# Supplementary material for: Prolonged continual consumption of oregano herb interferes with the action of steroid hormones and several drugs, and effects signaling across the brain–gut axis
Source: Royal Society of Chemistry journal article supplement (doi:10.1039/d0fo02988b), 2020-12-22
Supplement: d0fo02988b1.xlsx [file d0fo02988b1.xlsx]

## Sheet: TS2_Expression_Matrix
Name	Chromosome	Region	Identifier	2%OREG_1 Total counts	2%OREG_2 Total counts	2%OREG_3 Total counts	2%OREG_4 Total counts	CTRL_1 Total counts	CTRL_2 Total counts	CTRL_3 Total counts	CTRL_4 Total counts	2%OREG_1 RPKM	2%OREG_2 RPKM	2%OREG_3 RPKM	2%OREG_4 RPKM	CTRL_1 RPKM	CTRL_2 RPKM	CTRL_3 RPKM	CTRL_4 RPKM	2%OREG_1 TPM	2%OREG_2 TPM	2%OREG_3 TPM	2%OREG_4 TPM	CTRL_1 TPM	CTRL_2 TPM	CTRL_3 TPM	CTRL_4 TPM	2%OREG_1 CPM	2%OREG_2 CPM	2%OREG_3 CPM	2%OREG_4 CPM	CTRL_1 CPM	CTRL_2 CPM	CTRL_3 CPM	CTRL_4 CPM
ENSGALG00000045540	1	30..2665	ENSGALG00000045540	1350	2149	1531	1441	3039	1697	1887	1431	54.7524	83.7887	69.7722	59.5048	98.7968	82.6783	98.3653	58.0169	144.348	213.603	173.448	145.994	261.177	206.783	252.362	147.107	60.1312	85.8311	70.0171	61.7868	95.5265	83.1982	97.1233	62.5475
ENSGALG00000031626	1	complement(9912..14699)	ENSGALG00000031626	0	0	0	0	0	0	0	0	0	0	0	0	0	0	0	0	0	0	0	0	0	0	0	0	0	0	0	0	0	0	0	0
ENSGALG00000038274	1	complement(20935..25758)	ENSGALG00000038274	0	0	0	0	2	0	0	0	0	0	0	0	0.0843493	0	0	0	0	0	0	0	0.222984	0	0	0	0	0	0	0	0.0628671	0	0	0
GOLGB1	1	34200..67146	ENSGALG00000041494	3394	3239	2430	2884	4487	2731	2691	3449	10.6455	9.76658	8.56439	9.21014	11.2811	10.29	10.8484	10.8141	28.0654	24.898	21.2904	22.5969	29.8224	25.7358	27.8323	27.4201	151.174	129.366	111.131	123.659	141.042	133.892	138.505	150.752
HCLS1	1	70097..82102	ENSGALG00000039682	1645	1273	1606	1138	1997	1216	941	996	18.7715	13.965	20.5928	13.2219	18.2664	16.6689	13.8014	11.3615	49.4885	35.601	51.192	32.4395	48.2885	41.6897	35.4082	28.8081	73.2709	50.8436	73.4471	48.7948	62.7728	59.6164	48.433	43.5341
ENSGALG00000038044	1	complement(95033..98698)	ENSGALG00000038044	145	178	162	180	245	159	161	164	1.96391	2.31768	2.4655	2.48224	2.65988	2.58697	2.80272	2.22046	5.17759	5.90847	6.12905	6.09013	7.03159	6.47015	7.19055	5.63015	6.45853	7.10932	7.40873	7.71799	7.70122	7.79524	8.28662	7.16827
RABL2L	1	98751..102696	ENSGALG00000032458	67	81	70	75	91	61	54	91	1.84923	2.14922	2.17096	2.10764	2.01326	2.02249	1.91562	2.51075	4.87526	5.47902	5.39684	5.17104	5.32221	5.05836	4.91465	6.3662	2.98429	3.23514	3.20131	3.21583	2.86045	2.99063	2.77936	3.97751
ACR	1	complement(103810..125279)	ENSGALG00000034366	3	6	3	3	3	5	9	3	0.0247749	0.0476344	0.0278387	0.0252249	0.0198588	0.0496021	0.0955284	0.024766	0.0653157	0.121435	0.0692047	0.0618887	0.0524983	0.124058	0.245084	0.0627963	0.133625	0.23964	0.137199	0.128633	0.0943006	0.245133	0.463227	0.131127
ARSA	1	complement(106221..121695)	ENSGALG00000035824	488	612	535	591	968	602	543	621	2.46843	2.97599	3.04083	3.04373	3.92481	3.65795	3.53021	3.14006	6.50769	7.58671	7.55926	7.46773	10.3755	9.14873	9.05698	7.96187	21.7363	24.4433	24.4671	25.3407	30.4277	29.514	27.948	27.1433
ENSGALG00000033919	1	155624..364584	ENSGALG00000033919	51	27	24	24	63	27	35	27	0.825994	0.420387	0.436772	0.395764	0.81788	0.525304	0.728576	0.437135	2.17762	1.0717	1.08578	0.970998	2.16213	1.31381	1.86921	1.10839	2.27162	1.07838	1.09759	1.02907	1.98031	1.32372	1.80144	1.18014
ENSGALG00000039165	1	393740..397870	ENSGALG00000039165	3	4	7	6	4	3	6	5	0.111597	0.143045	0.292596	0.227249	0.119271	0.134058	0.286869	0.185929	0.294212	0.364665	0.72737	0.55755	0.315302	0.335288	0.735981	0.471439	0.133625	0.15976	0.320131	0.257266	0.125734	0.14708	0.308818	0.218545
ARF5	1	complement(456388..463442)	ENSGALG00000043476	422	417	383	361	530	405	381	391	21.1735	20.1138	21.5931	18.4419	21.3156	24.4104	24.57	19.6111	55.8211	51.2763	53.6788	45.2467	56.3494	61.0517	63.0357	49.7254	18.7966	16.655	17.5157	15.4789	16.6598	19.8558	19.6099	17.0902
GCC1	1	463906..468791	ENSGALG00000033149	690	843	754	784	1109	733	628	854	5.56599	6.53733	6.83443	6.43914	7.1708	7.10294	6.51109	6.88647	14.674	16.6657	16.9899	15.7983	18.9565	17.7648	16.7046	17.4612	30.7337	33.6694	34.4826	33.6161	34.8598	35.9365	32.323	37.3274
DENND6B	1	complement(471180..485317)	ENSGALG00000043771	306	349	258	262	418	250	209	314	4.55433	4.99353	4.3148	3.9703	4.9868	4.46975	3.99806	4.67173	12.0069	12.73	10.7262	9.74103	13.183	11.1791	10.2573	11.8456	13.6297	13.9391	11.7991	11.234	13.1392	12.2567	10.7572	13.7246
PPP6R2	1	503268..563210	ENSGALG00000029341	2213	2482	1804	2072	2934	1889	1587	2071	13.5222	14.5796	12.3862	12.8906	14.3704	13.8656	12.4636	12.65	35.6495	37.1679	30.7912	31.6268	37.9891	34.6785	31.9761	32.0751	98.5706	99.1311	82.5022	88.8426	92.226	92.6113	81.6824	90.5212
ENSGALG00000043178	1	complement(573471..635071)	ENSGALG00000043178	4813	4547	4326	3840	6899	3796	3889	4456	14.6769	13.3298	14.8232	11.9225	16.8635	13.9054	15.2425	13.5834	38.6937	33.9816	36.8493	29.2516	44.5798	34.7783	39.1056	34.4418	214.379	181.607	197.841	164.65	216.86	186.105	200.166	194.767
ENSGALG00000044050	1	631894..632887	ENSGALG00000044050	3	3	3	2	2	0	5	3	0.0901275	0.0866436	0.101273	0.0611765	0.0481624	0	0.193066	0.0900954	0.237609	0.220881	0.251757	0.150095	0.127321	0	0.495323	0.228444	0.133625	0.11982	0.137199	0.0857554	0.0628671	0	0.257348	0.131127
MIOX	1	644122..644826	ENSGALG00000041965	4	18	12	15	15	7	6	4	0.357203	1.54528	1.20413	1.36384	1.07371	0.750918	0.688662	0.357075	0.941718	3.93938	2.99337	3.34616	2.83844	1.87809	1.7668	0.905393	0.178166	0.71892	0.548795	0.643166	0.471503	0.343187	0.308818	0.174836
LMF2	1	complement(645080..651787)	ENSGALG00000041528	3318	3073	3036	2805	3981	2631	2637	3083	37.1084	33.0398	38.1535	31.9409	35.6886	35.3473	37.9058	34.4678	97.8314	84.2285	94.8466	78.3662	94.3456	88.4056	97.2497	87.396	147.789	122.736	138.845	120.272	125.137	128.989	135.726	134.755
ENSGALG00000034272	1	651832..654431	ENSGALG00000034272	13	26	15	13	22	12	12	18	0.564067	1.08453	0.731334	0.574313	0.76516	0.625473	0.669219	0.780737	1.48709	2.76479	1.81804	1.40906	2.02276	1.56434	1.71692	1.97962	0.579041	1.03844	0.685994	0.55741	0.691538	0.58832	0.617636	0.786761
ENSGALG00000013811	1	659230..661272	ENSGALG00000013811	72	111	90	100	91	88	76	62	2.02552	3.00197	2.84502	2.86433	2.05205	2.97391	2.74801	1.74358	5.34003	7.65296	7.07248	7.02757	5.42476	7.43792	7.0502	4.42099	3.207	4.43334	4.11596	4.28777	2.86045	4.31435	3.9117	2.70996
IRF5	1	664415..677898	ENSGALG00000039982	80	85	102	48	95	50	44	47	1.17039	1.19547	1.67679	0.714992	1.11406	0.878723	0.82736	0.687361	3.08559	3.04763	4.16837	1.75422	2.94509	2.19774	2.12264	1.74286	3.56333	3.3949	4.66476	2.05813	2.98619	2.45133	2.26467	2.05432
TNPO3	1	complement(680003..697566)	ENSGALG00000039420	1509	1778	1577	1599	2247	1500	1213	1664	15.6536	17.7311	18.382	16.8885	18.684	18.692	16.1728	17.2553	41.2686	45.2019	45.6962	41.4355	49.3925	46.7497	41.4923	43.7522	67.2133	71.0133	72.1208	68.5615	70.6312	73.54	62.4327	72.7317
SMO	1	704038..711778	ENSGALG00000036114	792	1008	848	848	1270	724	824	841	9.43592	11.5451	11.3525	10.2866	12.1284	10.3619	12.6179	10.0161	24.8766	29.4321	28.2215	25.238	32.0624	25.9156	32.3719	25.3967	35.2769	40.2595	38.7815	36.3603	39.9206	35.4953	42.411	36.7592
ENSGALG00000032868	1	740871..754138	ENSGALG00000032868	2444	2164	1836	1703	2588	2052	1667	2741	49.8728	42.4521	42.0991	35.3831	42.3321	50.3014	43.7218	55.9135	131.483	108.223	104.655	86.8116	111.908	125.807	112.171	141.773	108.86	86.4302	83.9657	73.0208	81.35	100.603	85.8	119.806
STRIP2	1	758416..772309	ENSGALG00000038520	2	4	5	2	7	5	3	5	0.0204419	0.0393035	0.0574248	0.0208133	0.0573499	0.0613906	0.0394106	0.0510866	0.0538925	0.100197	0.142753	0.0510649	0.151609	0.153541	0.10111	0.129534	0.0890832	0.15976	0.228665	0.0857554	0.220035	0.245133	0.154409	0.218545
SMKR1	1	779412..782468	ENSGALG00000041065	6	3	3	6	6	12	6	5	0.31856	0.153123	0.178977	0.324346	0.255348	0.765352	0.409441	0.265372	0.839841	0.390357	0.444924	0.795777	0.675032	1.91419	1.05045	0.672872	0.26725	0.11982	0.137199	0.257266	0.188601	0.58832	0.308818	0.218545
NRF1	1	805409..839551	ENSGALG00000040060	294	305	317	244	478	292	210	276	4.32939	4.31776	5.24537	3.65837	5.64222	5.16538	3.97465	4.06288	11.4139	11.0073	13.0396	8.97573	14.9156	12.9189	10.1972	10.3018	13.0952	12.1817	14.4973	10.4622	15.0252	14.3158	10.8086	12.0637
UBE2H	1	complement(856372..898286)	ENSGALG00000031975	1703	2124	2064	2269	3144	2030	1928	2255	17.0016	20.385	23.1539	23.0637	25.1595	24.3452	24.7391	22.5044	44.8226	51.9675	57.5587	56.5863	66.5109	60.8886	63.4696	57.0618	75.8543	84.8326	94.3928	97.2895	98.827	99.5241	99.2335	98.5637
ZC3HC1	1	complement(899544..908528)	ENSGALG00000008003	379	338	305	381	421	286	233	332	5.86502	5.02836	5.30356	6.00307	5.22222	5.31663	4.63432	5.13587	15.4624	12.8188	13.1842	14.7284	13.8053	13.2972	11.8896	13.0224	16.8813	13.4997	13.9485	16.3364	13.2335	14.0216	11.9924	14.5114
KLHDC10	1	916160..921717	ENSGALG00000008013	245	299	265	309	366	231	186	277	5.80237	6.80753	7.05216	7.45102	6.94805	6.57191	5.66177	6.55789	15.2972	17.3545	17.5311	18.2809	18.3677	16.4367	14.5256	16.6281	10.9127	11.9421	12.1192	13.2492	11.5047	11.3252	9.57336	12.1074
ENSGALG00000036140	1	complement(925136..930918)	ENSGALG00000036140	1	0	1	0	2	0	0	0	0.013136	0	0.0147605	0	0.0210589	0	0	0	0.0346313	0	0.0366933	0	0.0556707	0	0	0	0.0445416	0	0.0457329	0	0.0628671	0	0	0
ENSGALG00000045035	1	complement(931381..933117)	ENSGALG00000045035	0	1	1	1	0	1	0	1	0	0.0161615	0.0188903	0.0171167	0	0.0201949	0	0.0168054	0	0.0412006	0.0469599	0.0419955	0	0.0505087	0	0.0426113	0	0.03994	0.0457329	0.0428777	0	0.0490266	0	0.043709
TMEM209	1	complement(933552..945389)	ENSGALG00000008036	543	691	616	687	692	471	464	676	5.21075	6.37467	6.6423	6.71236	5.32291	5.42952	5.72293	6.48474	13.7375	16.251	16.5122	16.4686	14.0715	13.5795	14.6825	16.4426	24.1861	27.5985	28.1715	29.457	21.752	23.0916	23.8819	29.5473
ENSGALG00000023942	1	947930..951486	ENSGALG00000023942	0	0	2	0	1	0	1	0	0	0	0.0822369	0	0.029332	0	0.0470326	0	0	0	0.204434	0	0.0775413	0	0.120665	0	0	0	0.0914659	0	0.0314335	0	0.0514697	0
CPA2	1	952077..958465	ENSGALG00000008048	2	3	9	8	4	1	4	3	0.0422901	0.060983	0.21384	0.172233	0.0677971	0.0254009	0.10871	0.0634125	0.111492	0.155464	0.531589	0.42257	0.179227	0.063529	0.278902	0.160788	0.0890832	0.11982	0.411596	0.343022	0.125734	0.0490266	0.205879	0.131127
CPA5	1	960181..964481	ENSGALG00000027296	187	85	164	89	361	145	144	124	4.09344	1.78873	4.03392	1.9836	6.33426	3.81289	4.05144	2.7134	10.7918	4.56002	10.028	4.86672	16.7451	9.53626	10.3942	6.88004	8.32928	3.3949	7.5002	3.81612	11.3475	7.10886	7.41163	5.41991
CPA1	1	965365..969129	ENSGALG00000008087	3	0	1	0	2	1	0	2	0.0654249	0	0.0245052	0	0.0349618	0.0261976	0	0.043601	0.172484	0	0.0609181	0	0.0924242	0.0655217	0	0.110554	0.133625	0	0.0457329	0	0.0628671	0.0490266	0	0.0874179
CEP41	1	complement(970622..978922)	ENSGALG00000008103	89	121	110	125	181	101	106	113	1.52698	1.99575	2.12067	2.18359	2.48922	2.08163	2.33748	1.93806	4.02568	5.08779	5.27181	5.35739	6.58044	5.20628	5.99696	4.9141	3.9642	4.83274	5.03062	5.35971	5.68947	4.95169	5.45579	4.93911
MEST	1	980060..984213	ENSGALG00000008111	380	366	349	367	436	355	281	344	6.77442	6.27261	6.99119	6.66151	6.23042	7.60251	6.43865	6.13045	17.8599	15.9908	17.3795	16.3439	16.4706	19.0143	16.5188	15.5442	16.9258	14.618	15.9608	15.7361	13.705	17.4045	14.463	15.0359
COPG2	1	complement(984497..1001467)	ENSGALG00000008144	1633	1910	1445	1685	2154	1360	1300	1687	18.2494	20.5199	18.1455	19.1726	19.2953	18.2575	18.6727	18.8462	48.1122	52.3115	45.1082	47.0395	51.0085	45.6631	47.9059	47.786	72.7364	76.2854	66.0841	72.249	67.7078	66.6762	66.9106	73.737
ENSGALG00000008153	1	1016112..1018737	ENSGALG00000008153	130	123	99	91	149	92	83	99	4.00863	3.64617	3.43024	2.85701	3.68282	3.40785	3.2895	3.05164	10.5682	9.2952	8.52731	7.00961	9.73582	8.52322	8.43943	7.73767	5.79041	4.91262	4.52756	3.90187	4.6836	4.51045	4.27198	4.32719
FBXO18	1	complement(1020496..1042028)	ENSGALG00000008162	568	831	617	771	1056	567	530	666	5.45783	7.6763	6.66184	7.543	8.13351	6.54478	6.54557	6.39722	14.3889	19.5692	16.5608	18.5066	21.5015	16.3689	16.7931	16.2207	25.2996	33.1901	28.2172	33.0587	33.1938	27.7981	27.2789	29.1102
ANKRD16	1	1044881..1060889	ENSGALG00000008168	41	83	66	61	57	83	43	58	0.515613	1.00345	0.932656	0.781067	0.574589	1.25389	0.695038	0.729144	1.35935	2.55811	2.31851	1.91633	1.51897	3.13604	1.78316	1.8488	1.82621	3.31502	3.01837	2.61554	1.79171	4.06921	2.2132	2.53512
GDI2	1	1061920..1076763	ENSGALG00000008169	8895	10166	7697	8873	11304	7554	6512	8824	109.597	120.416	106.565	111.312	111.642	111.808	103.126	108.684	288.939	306.977	264.911	273.102	295.134	279.637	264.576	275.576	396.198	406.03	352.006	380.454	355.325	370.347	335.171	385.688
ENSGALG00000039639	1	complement(1093568..1098481)	ENSGALG00000039639	27	25	25	11	29	14	26	36	1.61234	1.4352	1.67753	0.668813	1.38814	1.0043	1.99557	2.14902	4.25073	3.65877	4.17021	1.64092	3.66966	2.5118	5.11976	5.44902	1.20262	0.9985	1.14332	0.471655	0.911573	0.686373	1.33821	1.57352
ASB13	1	1117558..1125832	ENSGALG00000008401	135	163	141	120	124	123	113	150	4.15841	4.82681	4.88034	3.76351	3.06167	4.55134	4.47376	4.61881	10.9631	12.305	12.1321	9.23369	8.09374	11.3832	11.4777	11.7114	6.01312	6.51022	6.44834	5.14533	3.89776	6.03028	5.81607	6.55634
CALML3	1	complement(1133309..1134331)	ENSGALG00000008424	0	0	0	0	1	1	2	0	0	0	0	0	0.0279987	0.0419601	0.0897896	0	0	0	0	0	0.0740167	0.104945	0.230361	0	0	0	0	0	0.0314335	0.0490266	0.102939	0
NET1	1	complement(1137276..1148688)	ENSGALG00000008437	5945	7551	5258	7537	8601	6275	6127	6320	56.4742	68.9576	56.125	72.8979	65.4922	71.6065	74.8077	60.0151	148.887	175.794	139.522	178.853	173.134	179.092	191.924	152.173	264.8	301.587	240.464	323.169	270.36	307.642	315.355	276.241
TUBAL3	1	1198475..1204984	ENSGALG00000008444	137	587	176	540	367	549	288	206	2.13137	8.7792	3.07672	8.55362	4.57664	10.2601	5.75878	3.20369	5.61908	22.3809	7.64848	20.9861	12.0987	25.661	14.7745	8.12321	6.1022	23.4448	8.049	23.154	11.5361	26.9156	14.8233	9.00404
UCN3	1	complement(1213840..1214346)	ENSGALG00000032978	45	61	75	86	87	31	35	34	2.59183	3.37756	4.85392	5.04326	4.01658	2.14485	2.59097	1.95758	6.83303	8.61044	12.0665	12.3735	10.6181	5.36438	6.6473	4.96359	2.00437	2.43634	3.42997	3.68748	2.73472	1.51983	1.80144	1.4861
SLC35B4	1	1341915..1354128	ENSGALG00000038187	354	387	331	310	538	284	278	372	7.08517	7.44624	7.4441	6.31723	8.63121	6.82819	7.15141	7.44278	18.6791	18.9828	18.5054	15.4992	22.8172	17.0777	18.3474	18.8718	15.7677	15.4568	15.1376	13.2921	16.9112	13.9236	14.3086	16.2597
LRGUK	1	complement(1375947..1410781)	ENSGALG00000037842	2	1	1	1	1	4	1	2	0.0320014	0.0153822	0.0179795	0.0162914	0.0128257	0.0768846	0.0205655	0.03199	0.0843676	0.039214	0.0446955	0.0399705	0.0339057	0.192293	0.0527621	0.0811133	0.0890832	0.03994	0.0457329	0.0428777	0.0314335	0.196107	0.0514697	0.0874179
EXOC4	1	complement(1421469..1841500)	ENSGALG00000008477	1525	1577	1467	1660	2156	1302	1428	1568	10.9013	10.8373	11.7836	12.0819	12.3538	11.1805	13.1201	11.2047	28.74	27.6276	29.2931	29.6428	32.6582	27.9631	33.6605	28.4105	67.9259	62.9854	67.0902	71.177	67.7707	63.8327	73.4987	68.5356
ENSGALG00000045957	1	1632719..1633541	ENSGALG00000045957	0	0	0	0	0	0	0	0	0	0	0	0	0	0	0	0	0	0	0	0	0	0	0	0	0	0	0	0	0	0	0	0
ENSGALG00000045303	1	1645800..1646634	ENSGALG00000045303	0	0	0	2	4	1	0	2	0	0	0	0.102171	0.160872	0.0602725	0	0.100312	0	0	0	0.250674	0.425278	0.150745	0	0.25435	0	0	0	0.0857554	0.125734	0.0490266	0	0.0874179
ENSGALG00000045493	1	1660111..1660939	ENSGALG00000045493	0	2	0	0	1	1	0	1	0	0.0964691	0	0	0.0402181	0.0602725	0	0.0501562	0	0.245929	0	0	0.10632	0.150745	0	0.127175	0	0.07988	0	0	0.0314335	0.0490266	0	0.043709
ENSGALG00000046002	1	1848453..1850658	ENSGALG00000046002	0	0	0	0	0	0	0	0	0	0	0	0	0	0	0	0	0	0	0	0	0	0	0	0	0	0	0	0	0	0	0	0
ENSGALG00000045694	1	1855523..1857716	ENSGALG00000045694	0	0	0	0	0	0	0	0	0	0	0	0	0	0	0	0	0	0	0	0	0	0	0	0	0	0	0	0	0	0	0	0
ENSGALG00000045599	1	1862581..1864781	ENSGALG00000045599	0	0	0	0	0	0	0	0	0	0	0	0	0	0	0	0	0	0	0	0	0	0	0	0	0	0	0	0	0	0	0	0
ENSGALG00000045725	1	1869646..1871841	ENSGALG00000045725	0	0	0	0	0	0	0	0	0	0	0	0	0	0	0	0	0	0	0	0	0	0	0	0	0	0	0	0	0	0	0	0
CHCHD3	1	2002525..2187486	ENSGALG00000006489	1940	2437	2145	2588	2888	2063	1827	2203	36.6196	44.2228	45.4964	49.7387	43.697	46.779	44.3252	41.5692	96.5428	112.738	113.1	122.033	115.516	116.997	113.719	105.402	86.4107	97.3338	98.0971	110.968	90.7801	101.142	94.0351	96.2908
PLXNA4	1	2317554..2737972	ENSGALG00000006473	86	65	57	73	84	36	46	92	0.435992	0.316791	0.324707	0.376809	0.341351	0.219241	0.299735	0.466244	1.14944	0.807597	0.807196	0.924492	0.902387	0.548335	0.768989	1.1822	3.83058	2.5961	2.60678	3.13007	2.64042	1.76496	2.36761	4.02122
PODXL	1	3092445..3133147	ENSGALG00000006409	2563	2344	1962	2486	3805	2319	1975	2382	14.8028	13.0146	12.733	14.6189	17.6154	16.0893	14.661	13.7525	39.0257	33.1783	31.6533	35.8671	46.5676	40.2402	37.6136	34.8706	114.16	93.6194	89.728	106.594	119.605	113.693	101.653	104.115
MKLN1	1	complement(3142583..3240472)	ENSGALG00000006356	740	828	767	787	905	646	665	801	8.79128	9.45649	10.2389	9.51948	8.6181	9.2192	10.1541	9.51258	23.1771	24.1075	25.4531	23.3558	22.7826	23.0577	26.051	24.1199	32.9608	33.0703	35.0772	33.7448	28.4474	31.6712	34.2273	35.0109
ENSGALG00000044853	1	3256248..3256647	ENSGALG00000044853	0	0	0	1	1	2	0	3	0	0	0	0.105432	0.0830033	0.248785	0	0.310542	0	0	0	0.258674	0.219425	0.622224	0	0.787403	0	0	0	0.0428777	0.0314335	0.0980533	0	0.131127
K123	1	3465887..3476005	ENSGALG00000041978	42	34	62	38	65	34	26	31	0.610784	0.475331	1.01314	0.562653	0.757695	0.593961	0.485973	0.450656	1.61025	1.21177	2.51857	1.38046	2.00302	1.48553	1.24679	1.14268	1.87075	1.35796	2.83544	1.62935	2.04318	1.66691	1.33821	1.35498
IL2RA	1	complement(3482204..3498520)	ENSGALG00000042471	85	66	118	74	141	58	76	46	2.30251	1.71873	3.59172	2.04096	3.06158	1.88735	2.64604	1.24562	6.07028	4.38156	8.92874	5.00744	8.0935	4.72036	6.78859	3.15838	3.78604	2.63604	5.39649	3.17295	4.43213	2.84355	3.9117	2.01061
RBM17	1	3516514..3529166	ENSGALG00000006332	1020	1459	1131	1417	1600	1087	985	1149	22.9825	31.6032	28.635	32.5076	28.8975	29.4216	28.5255	25.8799	60.5904	80.5664	71.1843	79.7568	76.3926	73.5852	73.184	65.6206	45.4324	58.2725	51.7239	60.7577	50.2937	53.292	50.6976	50.2216
PFKFB3	1	3543236..3579756	ENSGALG00000040369	624	852	585	731	1336	619	591	783	10.8851	14.2878	11.4667	12.9832	18.6808	12.9711	13.2506	13.6538	28.6971	36.424	28.5054	31.854	49.3841	32.4415	33.9951	34.6203	27.794	34.0289	26.7538	31.3436	41.9952	30.3475	30.4186	34.2241
PRKCQ	1	complement(3665779..3701334)	ENSGALG00000034970	215	169	207	164	301	116	176	125	2.37095	1.79164	2.56503	1.84139	2.66068	1.53668	2.49458	1.37797	6.25071	4.56743	6.37645	4.51782	7.03371	3.84332	6.39999	3.49395	9.57644	6.74986	9.46672	7.03195	9.4615	5.68709	9.05866	5.46362
SFMBT2	1	complement(3929632..4025430)	ENSGALG00000009279	45	28	27	12	31	27	20	21	0.478536	0.286246	0.322629	0.129928	0.264244	0.34491	0.273358	0.223237	1.2616	0.729728	0.802029	0.318774	0.69855	0.862639	0.701317	0.566035	2.00437	1.11832	1.23479	0.514533	0.97444	1.32372	1.02939	0.917888
ENSGALG00000045751	1	complement(4052963..4054360)	ENSGALG00000045751	0	0	0	0	0	0	0	0	0	0	0	0	0	0	0	0	0	0	0	0	0	0	0	0	0	0	0	0	0	0	0	0
ENSGALG00000045088	1	complement(4066304..4067697)	ENSGALG00000045088	0	0	0	0	0	0	0	0	0	0	0	0	0	0	0	0	0	0	0	0	0	0	0	0	0	0	0	0	0	0	0	0
ENSGALG00000046301	1	complement(4075238..4076636)	ENSGALG00000046301	0	0	0	0	0	0	0	0	0	0	0	0	0	0	0	0	0	0	0	0	0	0	0	0	0	0	0	0	0	0	0	0
ENSGALG00000046451	1	complement(4086634..4088722)	ENSGALG00000046451	0	0	0	0	0	0	0	0	0	0	0	0	0	0	0	0	0	0	0	0	0	0	0	0	0	0	0	0	0	0	0	0
ENSGALG00000046295	1	complement(4095374..4096807)	ENSGALG00000046295	0	0	0	0	0	0	0	0	0	0	0	0	0	0	0	0	0	0	0	0	0	0	0	0	0	0	0	0	0	0	0	0
ENSGALG00000045491	1	complement(4105277..4106674)	ENSGALG00000045491	0	0	0	0	0	0	0	0	0	0	0	0	0	0	0	0	0	0	0	0	0	0	0	0	0	0	0	0	0	0	0	0
ENSGALG00000029446	1	4120319..4150431	ENSGALG00000029446	30	24	36	92	135	33	68	78	0.635732	0.488926	0.857221	1.98499	2.29313	0.840054	1.85209	1.65232	1.67603	1.24642	2.13098	4.87014	6.06207	2.10102	4.75165	4.18958	1.33625	0.95856	1.64639	3.94475	4.24353	1.61788	3.49994	3.4093
ITIH5	1	complement(4154034..4199469)	ENSGALG00000006891	1169	1278	1131	1642	2061	976	1492	1066	10.0786	10.5925	10.9569	14.4138	14.2432	10.1083	16.5332	9.18733	26.571	27.0034	27.2379	35.3639	37.6529	25.2814	42.4169	23.2952	52.0691	51.0433	51.7239	70.4052	64.7845	47.85	76.7928	46.5937
ITIH2	1	4206624..4231854	ENSGALG00000006833	61	53	19	55	67	9	42	31	0.610027	0.509535	0.213506	0.560016	0.537077	0.108119	0.539845	0.309903	1.60826	1.29896	0.530759	1.37399	1.4198	0.270412	1.38501	0.785785	2.71704	2.11682	0.868926	2.35827	2.10605	0.44124	2.16173	1.35498
KIN	1	complement(4233538..4248355)	ENSGALG00000030702	371	526	424	494	635	424	419	447	4.78097	6.51639	6.13968	6.48168	6.55932	6.5637	6.93995	5.75831	12.6044	16.6123	15.2627	15.9027	17.34	16.4162	17.8049	14.6007	16.5249	21.0084	19.3908	21.1816	19.9603	20.7873	21.5658	19.5379
ATP5C1	1	4248371..4255204	ENSGALG00000006753	6071	6083	5593	6694	6596	4735	4790	5981	92.0941	88.7091	95.3353	103.389	80.2037	86.2843	93.3914	90.6965	242.794	226.147	236.996	253.663	212.024	215.802	239.602	229.968	270.412	242.955	255.784	287.023	207.336	232.141	246.54	261.423
TAF3	1	4257754..4370309	ENSGALG00000006731	853	1181	1042	1066	1941	1120	1007	1086	7.08439	9.42936	9.7243	9.01424	12.9218	11.1741	10.7494	9.0163	18.6771	24.0383	24.1738	22.1162	34.1596	27.947	27.5782	22.8616	37.994	47.1691	47.6537	45.7076	61.0125	54.9098	51.83	47.4679
GATA3	1	4402132..4591692	ENSGALG00000029270	113	130	153	105	212	149	107	125	1.90737	2.1095	2.90192	1.80453	2.86837	3.02122	2.32135	2.10917	5.02853	5.37775	7.21393	4.42737	7.58273	7.55625	5.95556	5.34797	5.0332	5.1922	6.99714	4.50216	6.66391	7.30497	5.50726	5.46362
CELF2	1	5528711..5974445	ENSGALG00000034590	189	177	178	134	253	128	184	126	2.62687	2.36499	2.77993	1.89627	2.81864	2.13711	3.28696	1.75062	6.92539	6.02908	6.91068	4.65245	7.45127	5.34503	8.4329	4.43884	8.41836	7.06938	8.14046	5.74561	7.95269	6.27541	9.47042	5.50733
USP6NL	1	complement(6033346..6143773)	ENSGALG00000035563	1231	1438	1055	1378	1781	1186	1120	1215	6.8275	7.66729	6.57497	7.78165	7.9179	7.90185	7.98403	6.73636	17.9998	19.5463	16.3448	19.0921	20.9316	19.763	20.4835	17.0806	54.8307	57.4337	48.2482	59.0855	55.9831	58.1456	57.646	53.1064
ECHDC3	1	6163731..6168880	ENSGALG00000006690	370	426	548	533	702	576	393	496	7.00226	7.75042	11.6534	10.2703	10.6492	13.0948	9.55936	9.38347	18.4605	19.7582	28.9695	25.1979	28.1519	32.7508	24.5251	23.7925	16.4804	17.0144	25.0616	22.8538	22.0663	28.2393	20.2276	21.6796
PROSER2	1	6195950..6208354	ENSGALG00000006700	328	304	186	248	512	318	308	283	6.84145	6.09575	4.35938	5.26677	8.56025	7.96786	8.25705	5.90073	18.0366	15.5399	10.8371	12.9219	22.6297	19.9281	21.184	14.9618	14.6096	12.1418	8.50632	10.6337	16.094	15.5905	15.8527	12.3696
UPF2	1	complement(6218145..6266504)	ENSGALG00000033772	1681	1808	1538	1622	2278	1484	1366	1742	12.5865	13.0141	12.9399	12.3654	13.6721	13.3479	13.1458	13.0386	33.1827	33.177	32.1676	30.3381	36.1431	33.3838	33.7265	33.0604	74.8744	72.2115	70.3372	69.5477	71.6056	72.7555	70.3076	76.141
DHTKD1	1	6275964..6292436	ENSGALG00000003674	288	351	329	394	495	282	261	321	3.03719	3.55849	3.89863	4.23052	4.18434	3.57247	3.53769	3.38399	8.00715	9.07168	9.6917	10.3795	11.0616	8.93495	9.07617	8.58039	12.828	14.0189	15.0461	16.8938	15.5596	13.8255	13.4336	14.0306
SEC61A2	1	6299537..6315134	ENSGALG00000036300	251	282	365	345	411	233	228	229	3.08482	3.33184	5.04064	4.31711	4.04893	3.43995	3.60156	2.81343	8.13272	8.49388	12.5306	10.5919	10.7036	8.60351	9.24003	7.13369	11.1799	11.2631	16.6925	14.7928	12.9192	11.4232	11.7351	10.0094
NUDT5	1	complement(6315849..6327450)	ENSGALG00000013967	518	429	476	602	550	418	421	403	10.1519	8.08262	10.4824	12.0124	8.64015	9.84085	10.6047	7.89526	26.7641	20.6051	26.0584	29.4722	22.8409	24.6125	27.207	20.0191	23.0725	17.1343	21.7689	25.8124	17.2884	20.4931	21.6687	17.6147
CDC123	1	6327502..6445602	ENSGALG00000014038	523	684	580	616	757	592	595	623	8.90512	11.1963	11.0969	10.6792	10.3318	12.1088	13.0213	10.604	23.4772	28.5427	27.5861	26.2011	27.3129	30.2847	33.407	26.8874	23.2953	27.319	26.5251	26.4127	23.7952	29.0238	30.6245	27.2307
CAMK1D	1	6522549..6602832	ENSGALG00000033051	98	82	113	77	97	62	58	75	3.21182	2.58355	4.16141	2.56941	2.54823	2.44094	2.44316	2.45715	8.46753	6.58627	10.3449	6.30399	6.73644	6.10492	6.26809	6.23029	4.36508	3.27508	5.16782	3.30158	3.04905	3.03965	2.98524	3.27817
CCDC3	1	complement(6627009..6665964)	ENSGALG00000030140	14	15	11	11	13	10	12	5	0.473169	0.48737	0.417752	0.378529	0.352188	0.406003	0.521279	0.168929	1.24745	1.24246	1.0385	0.928713	0.931034	1.01544	1.33737	0.428333	0.623582	0.5991	0.503062	0.471655	0.408636	0.490266	0.617636	0.218545
OPTN	1	6691790..6711192	ENSGALG00000013738	2284	2912	2516	2949	3477	2354	2283	2402	26.2169	32.1333	32.4514	34.465	31.9913	32.4588	33.6815	27.5615	69.1174	81.9177	80.6715	84.5591	84.5714	81.1812	86.4119	69.8845	101.733	116.305	115.064	126.446	109.294	115.409	117.505	104.989
MCM10	1	6714748..6729461	ENSGALG00000034198	98	126	116	88	122	83	87	80	1.00623	1.24372	1.33834	0.91997	1.0041	1.02374	1.14813	0.821122	2.6528	3.17062	3.32702	2.25713	2.6544	2.56044	2.94561	2.08202	4.36508	5.03244	5.30502	3.77324	3.83489	4.06921	4.47786	3.49672
PHYH	1	complement(6734021..6745789)	ENSGALG00000035636	7878	5440	6824	8552	6074	5784	5006	7628	111.349	73.918	108.38	123.072	68.816	98.2065	90.9417	107.777	293.558	188.44	269.424	301.953	181.92	245.62	233.317	273.278	350.899	217.274	312.082	366.69	190.927	283.57	257.657	333.412
SEPHS1	1	complement(6753307..6777163)	ENSGALG00000014575	1506	1596	1359	1493	1720	1041	1214	1254	17.8406	18.176	18.0901	18.0079	16.3326	14.8141	18.4843	14.8501	47.0345	46.3361	44.9707	44.182	43.1765	37.051	47.4227	37.6535	67.0797	63.7442	62.1511	64.0164	54.0657	51.0367	62.4842	54.811
BEND7	1	complement(6790345..6838577)	ENSGALG00000006682	2342	2757	2274	2363	3337	2209	1934	2528	20.0145	22.6503	21.8366	20.5608	22.8589	22.6774	21.2429	21.5963	52.7656	57.7425	54.2841	50.4454	60.4293	56.7175	54.5	54.7592	104.316	110.115	103.997	101.32	104.894	108.3	99.5424	110.496
ENSGALG00000043593	1	6850114..6866826	ENSGALG00000043593	770	994	841	914	1439	837	771	912	13.8711	17.2141	17.0236	16.7642	20.7789	18.1128	17.8515	16.4233	36.5693	43.8841	42.3194	41.1307	54.9305	45.3011	45.799	41.6425	34.297	39.7004	38.4614	39.1902	45.2329	41.0353	39.6831	39.8626
FRMD4A	1	complement(6872404..6904583)	ENSGALG00000034992	106	120	112	89	193	98	91	82	1.31214	1.42802	1.55786	1.12172	1.91502	1.45727	1.44782	1.01469	3.45929	3.64047	3.87273	2.7521	5.06251	3.64472	3.71448	2.57283	4.72141	4.7928	5.12209	3.81612	6.06667	4.80461	4.68374	3.58413
FAM107B	1	complement(7293529..7352456)	ENSGALG00000033226	226	270	300	238	392	182	187	181	3.5789	4.1104	5.33826	3.8374	4.97588	3.46221	3.80612	2.86527	9.43531	10.4787	13.2705	9.41496	13.1541	8.65917	9.76485	7.26512	10.0664	10.7838	13.7199	10.2049	12.3219	8.92285	9.62483	7.91132
ENSGALG00000035201	1	7436997..7447884	ENSGALG00000035201	516	618	474	650	731	502	509	515	7.04106	8.10692	7.26782	9.03067	7.99555	8.22872	8.92702	7.02491	18.5628	20.667	18.0672	22.1566	21.1368	20.5805	22.9028	17.8122	22.9835	24.6829	21.6774	27.8705	22.9779	24.6114	26.1981	22.5101
SUV39H2	1	7449344..7459103	ENSGALG00000013920	510	710	630	616	891	481	452	580	3.50086	4.68535	4.8594	4.3053	4.90258	3.96634	3.98789	3.97995	9.22957	11.9444	12.0801	10.563	12.9603	9.92004	10.2312	10.0915	22.7162	28.3574	28.8117	26.4127	28.0073	23.5818	23.2643	25.3512
DCLRE1C	1	complement(7459373..7469951)	ENSGALG00000013926	176	257	182	209	308	131	137	201	1.6264	2.28311	1.88984	1.96644	2.28144	1.45421	1.62718	1.85676	4.2878	5.82036	4.69798	4.82461	6.03114	3.63706	4.17463	4.70797	7.83932	10.2646	8.32339	8.96144	9.68153	6.42249	7.05135	8.7855
MEIG1	1	7470107..7475632	ENSGALG00000000451	1	1	0	1	2	0	0	1	0.0447873	0.043056	0	0.0456009	0.0718004	0	0	0.0447713	0.118076	0.109763	0	0.111881	0.18981	0	0	0.113521	0.0445416	0.03994	0	0.0428777	0.0628671	0	0	0.043709
TMEM243	1	7487583..7494099	ENSGALG00000006633	52	111	90	92	80	66	63	91	4.28946	8.8024	8.34217	7.7269	5.2897	6.54008	6.67943	7.50388	11.3086	22.44	20.738	18.9578	13.9837	16.3571	17.1365	19.0267	2.31616	4.43334	4.11596	3.94475	2.51468	3.23576	3.24259	3.97751
DMTF1	1	complement(7494480..7523025)	ENSGALG00000030844	727	1016	774	898	1248	721	676	743	5.67175	7.62	6.78517	7.13308	7.8044	6.75706	6.77843	5.79451	14.9528	19.4257	16.8674	17.5008	20.6315	16.8998	17.3905	14.6924	32.3817	40.579	35.3973	38.5042	39.2291	35.3482	34.7935	32.4758
KIAA1324L	1	7556518..7647412	ENSGALG00000030324	346	173	325	50	434	183	191	298	2.83731	1.36382	2.99468	0.417464	2.85274	1.80269	2.01309	2.44282	7.48019	3.47678	7.44455	1.02424	7.54143	4.50864	5.16471	6.19397	15.4114	6.90962	14.8632	2.14389	13.6422	8.97188	9.83071	13.0253
GRM3	1	complement(7655306..7725473)	ENSGALG00000006576	0	1	0	0	0	0	2	1	0	0.00973051	0	0	0	0	0.0260188	0.0101182	0	0.0248061	0	0	0	0	0.0667527	0.0256554	0	0.03994	0	0	0	0	0.102939	0.043709
ENSGALG00000046227	1	7851763..7857098	ENSGALG00000046227	0	0	0	0	0	0	0	0	0	0	0	0	0	0	0	0	0	0	0	0	0	0	0	0	0	0	0	0	0	0	0	0
SEMA3D	1	8310340..8452139	ENSGALG00000006563	139	206	186	163	375	179	268	141	1.49999	2.13708	2.25541	1.79094	3.24376	2.32043	3.71714	1.52103	3.95454	5.44807	5.60676	4.39402	8.57511	5.80352	9.53656	3.8567	6.19128	8.22764	8.50632	6.98907	11.7876	8.77577	13.7939	6.16296
SEMA3A	1	8824964..8995709	ENSGALG00000006560	164	251	175	171	219	133	183	155	1.47309	2.1674	1.76628	1.56387	1.57678	1.43508	2.11269	1.39175	3.88361	5.52536	4.39084	3.83691	4.16834	3.58922	5.42025	3.5289	7.30482	10.0249	8.00326	7.33209	6.88395	6.52054	9.41895	6.77489
SEMA3E	1	9507267..9637821	ENSGALG00000038225	1	1	1	0	0	0	0	0	0.0119092	0.0114488	0.0133819	0	0	0	0	0	0.031397	0.0291866	0.0332664	0	0	0	0	0	0.0445416	0.03994	0.0457329	0	0	0	0	0
ENSGALG00000037435	1	9732868..9752834	ENSGALG00000037435	21	8	5	7	13	4	9	23	0.211458	0.0774414	0.0565733	0.0717663	0.104928	0.0483843	0.116479	0.231514	0.557481	0.197422	0.140637	0.176077	0.277384	0.121012	0.298834	0.587022	0.935374	0.31952	0.228665	0.300144	0.408636	0.196107	0.463227	1.00531
ENSGALG00000039659	1	9891183..9921006	ENSGALG00000039659	29	28	12	16	45	11	28	40	0.238412	0.221292	0.110853	0.133927	0.296541	0.108633	0.295861	0.328726	0.628541	0.564142	0.275572	0.328586	0.783927	0.271698	0.759049	0.833512	1.29171	1.11832	0.548795	0.686043	1.41451	0.539293	1.44115	1.74836
ENSGALG00000040151	1	9982718..10003976	ENSGALG00000040151	6	8	7	4	21	6	6	2	0.154914	0.198568	0.203084	0.105152	0.434612	0.186093	0.199109	0.0516196	0.408411	0.50621	0.50485	0.257988	1.14893	0.46543	0.510827	0.130886	0.26725	0.31952	0.320131	0.171511	0.660104	0.29416	0.308818	0.0874179
ENSGALG00000034492	1	10052151..10057347	ENSGALG00000034492	1	0	0	0	0	0	0	1	0.0715718	0	0	0	0	0	0	0.0715463	0.18869	0	0	0	0	0	0	0.181411	0.0445416	0	0	0	0	0	0	0.043709
CACNA2D1	1	10220631..10584619	ENSGALG00000008486	633	921	866	866	1328	667	837	629	2.39498	3.34993	3.68174	3.33606	4.02752	3.03154	4.07027	2.37899	6.31404	8.54001	9.1525	8.18494	10.6471	7.58206	10.4425	6.03213	28.1948	36.7847	39.6047	37.1321	41.7437	32.7008	43.0801	27.4929
HGF	1	10650557..10710329	ENSGALG00000033974	23	14	27	15	29	13	20	15	0.212743	0.12449	0.280627	0.141266	0.215015	0.144448	0.23777	0.138696	0.56087	0.317364	0.697615	0.346593	0.568407	0.361272	0.610015	0.351675	1.02446	0.55916	1.23479	0.643166	0.911573	0.637346	1.02939	0.655634
SEMA3C	1	11044256..11159489	ENSGALG00000040444	283	343	354	339	566	274	330	292	3.5286	4.11139	4.95971	4.30361	5.65684	4.10399	5.28846	3.63951	9.30268	10.4812	12.3294	10.5588	14.9543	10.2643	13.5679	9.22828	12.6053	13.6994	16.1895	14.5355	17.7914	13.4333	16.985	12.763
CD36	1	complement(11182192..11218268)	ENSGALG00000008439	927	720	467	841	1247	661	1490	827	11.7134	8.74609	6.63066	10.8197	12.6302	10.0333	24.1985	10.4461	30.8808	22.2965	16.4833	26.546	33.3889	25.0939	62.0828	26.4869	41.2901	28.7568	21.3573	36.0602	39.1976	32.4066	76.6898	36.1473
GNAT3	1	11261662..11291903	ENSGALG00000008427	10	10	5	17	10	8	14	13	0.171369	0.164745	0.0962809	0.29662	0.137365	0.164688	0.308362	0.222701	0.451793	0.419985	0.239347	0.72775	0.363134	0.411895	0.791122	0.564675	0.445416	0.3994	0.228665	0.728921	0.314335	0.392213	0.720575	0.568216
GNAI1	1	complement(11370427..11403687)	ENSGALG00000008382	671	632	597	512	797	441	619	472	10.5971	9.59537	10.5944	8.23292	10.0894	8.36651	12.5648	7.45165	27.9379	24.4615	26.3369	20.1993	26.6721	20.9251	32.2358	18.8943	29.8874	25.2421	27.3026	21.9534	25.0525	21.6208	31.8597	20.6306
ENSGALG00000033870	1	11695658..11696044	ENSGALG00000033870	11	10	6	4	7	0	6	5	0.830011	0.725388	0.508721	0.307305	0.423381	0	0.581892	0.377143	2.18822	1.84924	1.26464	0.753966	1.11924	0	1.49288	0.956277	0.489958	0.3994	0.274398	0.171511	0.220035	0	0.308818	0.218545
ENSGALG00000038834	1	12120386..12302861	ENSGALG00000038834	20	16	15	8	33	10	14	18	0.365245	0.280901	0.30781	0.148752	0.48307	0.219378	0.328611	0.328603	0.96292	0.716102	0.765191	0.364959	1.27703	0.548678	0.843072	0.833199	0.890832	0.63904	0.685994	0.343022	1.03731	0.490266	0.720575	0.786761
ENSGALG00000008353	1	12373231..12420711	ENSGALG00000008353	49	81	54	59	122	58	107	54	0.380954	0.605398	0.471746	0.467032	0.760289	0.541683	1.0692	0.419677	1.00434	1.54335	1.17272	1.14585	2.00988	1.35478	2.74311	1.06413	2.18254	3.23514	2.46958	2.52979	3.83489	2.84355	5.50726	2.36028
PHTF2	1	complement(12441529..12504054)	ENSGALG00000008335	599	725	756	735	1055	561	576	448	3.92276	4.56438	5.56319	4.90084	5.53809	4.41334	4.84828	2.93284	10.3418	11.636	13.8296	12.0241	14.6403	11.038	12.4386	7.43645	26.6804	28.9565	34.5741	31.5151	33.1624	27.5039	29.6465	19.5816
TMEM60	1	12504428..12508654	ENSGALG00000008330	242	352	237	267	407	337	226	236	9.46013	13.2283	10.4104	10.627	12.7532	15.8253	11.3551	9.22229	24.9404	33.723	25.8794	26.0731	33.714	39.58	29.1322	23.3839	10.7791	14.0589	10.8387	11.4484	12.7935	16.522	11.6321	10.3153
RSBN1L	1	complement(12517000..12559907)	ENSGALG00000008328	428	456	342	382	665	361	398	418	4.61017	4.7219	4.13939	4.18943	5.74165	4.67111	5.51005	4.50085	12.1541	12.0376	10.2902	10.2787	15.1785	11.6827	14.1364	11.4123	19.0638	18.2126	15.6407	16.3793	20.9033	17.6986	20.4849	18.2703
ENSGALG00000042569	1	complement(12599372..12606519)	ENSGALG00000042569	68	67	40	54	86	41	37	61	5.29517	5.01562	3.5	4.28137	5.36799	3.83526	3.70316	4.74839	13.96	12.7864	8.70073	10.5043	14.1907	9.59221	9.5007	12.0399	3.02883	2.67598	1.82932	2.3154	2.70328	2.01009	1.90438	2.66625
GSAP	1	12676726..12723229	ENSGALG00000008312	272	290	378	323	525	275	341	323	3.30948	3.3921	5.16797	4.0014	5.12027	4.01942	5.33268	3.92861	8.72502	8.6475	12.8472	9.81734	13.5358	10.0528	13.6813	9.9613	12.1153	11.5826	17.287	13.8495	16.5026	13.4823	17.5512	14.118
ENSGALG00000046379	1	complement(12724257..12735670)	ENSGALG00000046379	26	20	15	17	14	9	8	5	0.589467	0.435909	0.382133	0.392422	0.254423	0.245115	0.233118	0.113319	1.55405	1.11127	0.949953	0.962799	0.672587	0.613045	0.59808	0.287329	1.15808	0.7988	0.685994	0.728921	0.44007	0.44124	0.411757	0.218545
ENSGALG00000008309	1	complement(12739743..12791062)	ENSGALG00000008309	4	4	16	7	7	6	6	8	0.0804444	0.0773348	0.36157	0.143335	0.112843	0.144953	0.155091	0.160831	0.212081	0.19715	0.898835	0.351669	0.29831	0.362536	0.397896	0.407801	0.178166	0.15976	0.731727	0.300144	0.220035	0.29416	0.308818	0.349672
FGL2	1	12776938..12782933	ENSGALG00000008306	2111	3387	4420	3659	7042	3263	3363	2426	19.7767	30.5042	46.5291	34.9017	52.8815	36.7217	40.4942	22.7196	52.1387	77.7646	115.668	85.6304	139.796	91.843	103.89	57.6075	94.0273	135.277	202.14	156.89	221.355	159.974	173.093	106.038
FAM185A	1	12796709..12835386	ENSGALG00000008301	440	531	447	634	632	412	405	670	10.7881	12.516	12.315	15.827	12.4208	12.1347	12.7628	16.4214	28.4413	31.907	30.6142	38.8311	32.8353	30.3495	32.7437	41.6378	19.5983	21.2081	20.4426	27.1845	19.866	20.199	20.8452	29.285
FBXL13	1	complement(12838227..12916687)	ENSGALG00000045817	4	5	1	2	2	0	0	3	0.0490366	0.0589264	0.0137752	0.0249637	0.0196532	0	0	0.0367644	0.129279	0.150221	0.034244	0.0612478	0.0519546	0	0	0.093219	0.178166	0.1997	0.0457329	0.0857554	0.0628671	0	0	0.131127
LRRC17	1	12869754..12885148	ENSGALG00000008298	353	570	438	480	628	336	474	311	5.31343	8.24811	7.40819	7.35631	7.57709	6.07547	9.1702	4.67957	14.0082	21.027	18.4162	18.0485	20.0306	15.1951	23.5267	11.8654	15.7232	22.7658	20.031	20.5813	19.7403	16.473	24.3966	13.5935
ENSGALG00000008288	1	12917065..12924669	ENSGALG00000008288	50	62	66	67	97	47	49	38	0.993242	1.18401	1.47322	1.35512	1.54454	1.12156	1.25107	0.754595	2.61855	3.01841	3.6623	3.32476	4.0831	2.80509	3.20969	1.91334	2.22708	2.47628	3.01837	2.87281	3.04905	2.30425	2.52201	1.66094
NAPEPLD	1	complement(12927118..12946956)	ENSGALG00000008285	9372	11859	9334	12815	12290	8548	7834	10420	113.135	137.624	126.611	157.508	118.922	123.957	121.549	125.742	298.267	350.845	314.745	386.443	314.378	310.024	311.841	318.828	417.444	473.648	426.871	549.478	386.318	419.08	403.213	455.447
PMPCB	1	12968095..12977041	ENSGALG00000008280	1290	1531	1280	1527	1857	1163	1257	1424	21.6866	24.7432	24.1796	26.1372	25.024	23.4867	27.1605	23.9308	57.174	63.0782	60.1086	64.1271	66.1528	58.7416	69.682	60.6785	57.4587	61.1481	58.5382	65.4743	58.3721	57.018	64.6974	62.2416
DNAJC2	1	complement(12976973..12994206)	ENSGALG00000008249	829	1898	1305	1710	2098	1342	1231	1353	12.1587	26.7612	21.507	25.5356	24.6649	23.6442	23.2054	19.8369	32.0547	68.2226	53.4646	62.6509	65.2034	59.1354	59.5349	50.2981	36.925	75.8061	59.6815	73.3209	65.9476	65.7938	63.3592	59.1382
PSMC2	1	12994324..13001483	ENSGALG00000008236	2963	3403	3130	3594	4214	2933	2787	3343	53.278	58.8244	63.2409	65.798	60.737	63.3532	64.41	60.0894	140.461	149.961	157.212	161.434	160.563	158.45	165.248	152.362	131.977	135.916	143.144	154.103	132.461	143.795	143.446	146.119
SLC26A5	1	complement(13005189..13038545)	ENSGALG00000008222	504	490	646	549	774	314	407	370	5.68022	5.30897	8.18097	6.29978	6.99227	4.25113	5.89562	4.16852	14.9752	13.5342	20.3372	15.4564	18.4846	10.6323	15.1256	10.5696	22.449	19.5706	29.5435	23.5399	24.3296	15.3944	20.9482	16.1723
RELN	1	complement(13046276..13318877)	ENSGALG00000008193	385	462	305	341	645	356	354	296	0.984716	1.13598	0.876572	0.88802	1.32237	1.09381	1.16373	0.756811	2.59608	2.89597	2.17909	2.17874	3.49578	2.73567	2.98563	1.91895	17.1485	18.4523	13.9485	14.6213	20.2746	17.4535	18.2203	12.9379
ORC5	1	complement(13347695..13416575)	ENSGALG00000008175	217	255	297	289	304	215	196	206	2.01165	2.27254	3.09375	2.72777	2.25896	2.39425	2.33533	1.90899	5.30344	5.7934	7.69082	6.69252	5.97172	5.98817	5.99143	4.8404	9.66553	10.1847	13.5827	12.3917	9.5558	10.5407	10.0881	9.00404
LHFPL3	1	13473708..13633870	ENSGALG00000043367	3	5	5	1	3	3	2	4	0.0878675	0.140785	0.164556	0.0298212	0.0704321	0.105553	0.07529	0.117115	0.231651	0.358904	0.409074	0.0731657	0.186193	0.263993	0.193161	0.296954	0.133625	0.1997	0.228665	0.0428777	0.0943006	0.14708	0.102939	0.174836
KMT2E	1	13764825..13809083	ENSGALG00000008167	2952	2837	2472	2535	4683	2392	2374	3017	22.4368	20.7292	21.1121	19.6174	28.5306	21.8397	23.1913	22.9227	59.1518	52.8452	52.4829	48.1308	75.4228	54.6223	59.4988	58.1223	131.487	113.31	113.052	108.695	147.203	117.272	122.189	131.87
SRPK2	1	complement(13820584..13864047)	ENSGALG00000008154	291	406	370	334	523	286	340	282	3.93954	5.28393	5.62848	4.6038	5.6754	4.65113	5.91604	3.81633	10.3861	13.4704	13.992	11.2953	15.0033	11.6327	15.178	9.67662	12.9616	16.2156	16.9212	14.3212	16.4397	14.0216	17.4997	12.3259
PUS7	1	13980518..13999714	ENSGALG00000008132	654	889	702	881	1069	764	628	761	7.28084	9.51447	8.7817	9.98615	9.53947	10.2173	8.98594	8.46903	19.195	24.2553	21.8306	24.5008	25.2183	25.5541	23.054	21.4739	29.1302	35.5067	32.1045	37.7753	33.6025	37.4564	32.323	33.2625
RINT1	1	14000109..14011966	ENSGALG00000008123	438	442	404	418	674	375	430	431	4.13253	4.00906	4.28312	4.01547	5.09734	4.25024	5.21447	4.06503	10.8949	10.2203	10.6475	9.85186	13.4752	10.6301	13.378	10.3072	19.5092	17.6535	18.4761	17.9229	21.1862	18.385	22.132	18.8386
EFCAB10	1	complement(14012404..14013602)	ENSGALG00000045949	6	6	5	4	13	6	9	8	0.45627	0.438633	0.427246	0.309706	0.792423	0.548103	0.879657	0.608144	1.2029	1.11821	1.0621	0.759856	2.09483	1.37084	2.25682	1.542	0.26725	0.23964	0.228665	0.171511	0.408636	0.29416	0.463227	0.349672
ATXN7L1	1	complement(14021170..14128960)	ENSGALG00000008115	548	603	488	474	768	529	449	532	4.94968	5.23592	4.95283	4.35906	5.56033	5.73974	5.21246	4.80345	13.0492	13.348	12.3123	10.6949	14.6991	14.3554	13.3729	12.1795	24.4088	24.0838	22.3177	20.324	24.141	25.9351	23.1099	23.2532
CDHR3	1	14151339..14182335	ENSGALG00000008109	27	39	48	32	53	42	106	35	0.211547	0.293756	0.422592	0.255277	0.33286	0.395305	1.06745	0.27413	0.557716	0.748874	1.05053	0.626316	0.879939	0.98868	2.73862	0.695078	1.20262	1.55766	2.19518	1.37209	1.66598	2.05912	5.45579	1.52981
SYPL1	1	complement(14192967..14199186)	ENSGALG00000029006	15	42	20	24	18	30	22	20	0.229811	0.618597	0.344308	0.374377	0.221052	0.552129	0.433214	0.306305	0.605867	1.57699	0.855921	0.918525	0.584367	1.38091	1.11144	0.776662	0.668124	1.67748	0.914659	1.02907	0.565804	1.4708	1.13233	0.874179
NAMPT	1	complement(14227437..14253838)	ENSGALG00000008098	1426	1375	898	1199	1350	952	806	1264	23.4334	21.7218	16.5817	20.061	17.7824	18.7928	17.0235	20.7638	61.779	55.3757	41.2207	49.2192	47.0092	47.0019	43.675	52.6483	63.5163	54.9175	41.0682	51.4104	42.4353	46.6734	41.4846	55.2481
PIK3CG	1	14409032..14442571	ENSGALG00000008081	970	628	644	630	1006	443	576	403	7.90767	4.9217	5.89929	5.2292	6.57381	4.33831	6.0353	3.28418	20.8475	12.5469	14.6652	12.8297	17.3783	10.8504	15.484	8.3273	43.2054	25.0823	29.452	27.013	31.6221	21.7188	29.6465	17.6147
PRKAR2B	1	14466581..14547811	ENSGALG00000008060	135	98	101	131	213	103	234	70	3.1588	2.20441	2.6555	3.12088	3.99493	2.89511	7.03726	1.63731	8.32775	5.61973	6.60136	7.65701	10.5609	7.24083	18.0545	4.15153	6.01312	3.91412	4.61903	5.61698	6.69534	5.04974	12.0439	3.05963
HBP1	1	14555740..14570086	ENSGALG00000008050	1274	1433	1223	1702	2305	1436	1334	1558	21.3684	23.1062	23.0498	29.0657	30.9897	28.9333	28.758	26.1226	56.3351	58.9048	57.3	71.3121	81.9235	72.3638	73.7806	66.2359	56.746	57.234	55.9314	72.9779	72.4543	70.4023	68.6606	68.0986
COG5	1	complement(14570254..14754461)	ENSGALG00000042764	1287	1702	1428	1897	2162	1498	1459	1369	8.67746	11.032	10.8188	13.0227	11.6846	12.1329	12.6436	9.22705	22.877	28.1239	26.8947	31.9508	30.889	30.3452	32.4378	23.3959	57.325	67.9779	65.3066	81.339	67.9593	73.4419	75.0943	59.8376
ENSGALG00000008032	1	14720135..14721436	ENSGALG00000008032	11	10	9	7	6	3	4	8	0.246708	0.215611	0.226815	0.159848	0.107866	0.0808263	0.115306	0.17936	0.650415	0.549658	0.563843	0.392184	0.285152	0.202151	0.295824	0.454783	0.489958	0.3994	0.411596	0.300144	0.188601	0.14708	0.205879	0.349672
DUS4L	1	14754169..14765791	ENSGALG00000023661	326	455	368	375	495	247	284	328	4.49039	6.025	5.69576	5.25916	5.4653	4.08699	5.02788	4.51633	11.8383	15.3596	14.1592	12.9032	14.4479	10.2218	12.8993	11.4515	14.5206	18.1727	16.8297	16.0791	15.5596	12.1096	14.6174	14.3365
BCAP29	1	14768856..14792300	ENSGALG00000008009	1731	2377	1911	2348	2642	1921	1800	2114	25.5807	33.7694	31.7332	35.329	31.2961	34.1022	34.1891	31.2295	67.4402	86.0886	78.8861	86.679	82.7336	85.2916	87.7143	79.185	77.1015	94.9374	87.3956	100.677	83.0474	94.1802	92.6454	92.4007
SLC26A4	1	14802883..14822828	ENSGALG00000007998	5	14	7	8	10	4	5	4	0.0234586	0.0631451	0.0369035	0.0382156	0.0376076	0.0225441	0.0301511	0.0187602	0.0618456	0.160976	0.0917393	0.0937612	0.0994183	0.0563841	0.0773545	0.047568	0.222708	0.55916	0.320131	0.343022	0.314335	0.196107	0.257348	0.174836
CBLL1	1	14822529..14828989	ENSGALG00000038981	843	971	729	742	1373	835	687	819	11.2302	12.4354	10.9126	10.0643	14.6614	13.3625	11.763	10.9066	29.6071	31.7017	27.1278	24.6926	38.7584	33.4204	30.1787	27.6547	37.5486	38.7817	33.3393	31.8153	43.1582	40.9373	35.3597	35.7976
SLC26A3	1	complement(14833201..14843801)	ENSGALG00000007959	12594	11562	10722	12123	14981	14648	10757	14324	155.174	136.951	148.446	152.084	147.958	216.807	170.351	176.426	409.095	349.131	369.024	373.134	391.137	542.246	437.047	447.343	560.957	461.786	490.348	519.807	470.906	718.142	553.659	626.087
DLD	1	14867128..14880879	ENSGALG00000007931	4992	5535	4287	5365	5323	3946	3757	5322	57.6405	61.4398	55.6217	63.0727	49.2666	54.7332	55.7564	61.429	151.962	156.629	138.271	154.747	130.24	136.891	143.047	155.758	222.352	221.068	196.057	230.039	167.321	193.459	193.372	232.619
LAMB1	1	complement(14882571..14913134)	ENSGALG00000007905	2714	4201	3470	3405	5696	3018	3441	2986	19.8379	29.5201	28.5005	25.3408	33.3732	26.4999	32.3274	21.8183	52.3	75.2557	70.8499	62.1732	88.2245	66.2779	82.9379	55.322	120.886	167.788	158.693	145.999	179.045	147.962	177.107	130.515
LAMB4	1	complement(14926773..14978515)	ENSGALG00000007917	9	5	14	8	8	6	8	5	0.0493821	0.026374	0.0863163	0.0446926	0.0351852	0.0395475	0.056418	0.0274247	0.13019	0.0672355	0.214575	0.109652	0.0930146	0.0989105	0.144744	0.0695377	0.400874	0.1997	0.640261	0.343022	0.251468	0.29416	0.411757	0.218545
ERGIC2	1	14978514..15001585	ENSGALG00000007183	4002	4887	3187	4289	4457	3043	2623	3371	35.0416	41.1365	31.3564	38.2367	31.2818	32.0073	29.5192	29.506	92.3825	104.87	77.9494	93.813	82.6957	80.052	75.7334	74.8148	178.255	195.187	145.751	183.903	140.099	149.188	135.005	147.343
LRRK2	1	complement(15008474..15072568)	ENSGALG00000007161	299	325	255	231	320	209	172	146	0.916372	0.957553	0.878169	0.720827	0.786127	0.769462	0.677531	0.4473	2.41589	2.4411	2.18306	1.76853	2.07819	1.92447	1.73825	1.13416	13.3179	12.9805	11.6619	9.90475	10.0587	10.2466	8.85278	6.38151
SLC2A13	1	15117535..15247833	ENSGALG00000035940	602	580	462	515	794	524	485	780	7.11132	6.58659	6.13244	6.19412	7.51825	7.43576	7.36369	9.21072	18.7481	16.7913	15.2448	15.1971	19.875	18.5973	18.892	23.3545	26.814	23.1652	21.1286	22.082	24.9582	25.69	24.9628	34.093
ENSGALG00000044979	1	complement(15262989..15270491)	ENSGALG00000044979	2	1	13	0	2	8	1	0	0.0533357	0.025637	0.389555	0	0.0427524	0.256282	0.0342758	0	0.140613	0.0653566	0.968403	0	0.113019	0.640976	0.0879368	0	0.0890832	0.03994	0.594528	0	0.0628671	0.392213	0.0514697	0
ABCD2	1	15281148..15323045	ENSGALG00000042554	1219	1301	339	309	522	451	384	884	16.1508	16.5709	5.04694	4.16838	5.54375	7.17807	6.53916	11.7081	42.5795	42.2444	12.5463	10.227	14.6553	17.9527	16.7766	29.6869	54.2962	51.9619	15.5035	13.2492	16.4083	22.111	19.7644	38.6387
KIF21A	1	15350861..15434281	ENSGALG00000007098	1950	2351	1723	1680	2594	1879	1899	2404	10.1883	11.8086	10.1156	8.93708	10.8638	11.7933	12.7524	12.5559	26.8602	30.1039	25.1465	21.9269	28.7192	29.4957	32.7172	31.8365	86.8561	93.8989	78.7978	72.0346	81.5386	92.1211	97.7409	105.076
ENSGALG00000043872	1	15439407..15482407	ENSGALG00000043872	3	6	2	1	1	1	4	1	0.0335262	0.0644604	0.0251148	0.0113784	0.00895788	0.0134247	0.0574543	0.0111714	0.0883874	0.164329	0.0624335	0.0279166	0.0236808	0.0335758	0.147403	0.028326	0.133625	0.23964	0.0914659	0.0428777	0.0314335	0.0490266	0.205879	0.043709
CPNE8	1	15507104..15601794	ENSGALG00000007025	97	122	93	85	160	84	117	107	1.32114	1.59741	1.4233	1.17873	1.74679	1.37435	2.04816	1.45682	3.48302	4.07229	3.53822	2.89199	4.61776	3.43732	5.25468	3.69389	4.32054	4.87268	4.25316	3.64461	5.02937	4.11824	6.02195	4.67686
ALG10	1	complement(15692075..15699046)	ENSGALG00000040272	255	323	295	276	386	235	239	246	3.40326	4.14416	4.42399	3.75044	4.12938	3.76758	4.09971	3.28198	8.97225	10.5647	10.9977	9.20162	10.9163	9.42294	10.5181	8.32171	11.3581	12.9006	13.4912	11.8342	12.1333	11.5213	12.3013	10.7524
TPRKB	1	15698711..15702692	ENSGALG00000013018	261	349	297	357	393	281	283	280	4.20151	5.40094	5.37228	5.85129	5.07107	5.4339	5.85533	4.50576	11.0767	13.7687	13.3551	14.356	13.4058	13.5905	15.0222	11.4247	11.6254	13.9391	13.5827	15.3073	12.3534	13.7765	14.5659	12.2385
GTSE1	1	15710309..15721324	ENSGALG00000004897	117	167	138	163	178	91	94	152	1.34669	1.8479	1.78484	1.91024	1.64227	1.25824	1.39062	1.74892	3.55037	4.71085	4.43696	4.68673	4.34146	3.14693	3.56773	4.43453	5.21137	6.66998	6.31114	6.98907	5.59517	4.46143	4.83815	6.64376
TRMU	1	15721903..15733539	ENSGALG00000031922	410	596	453	544	822	434	455	478	4.15425	5.80542	5.15755	5.6121	6.6761	5.28248	5.92543	4.84152	10.9521	14.7998	12.8213	13.7692	17.6488	13.2118	15.2021	12.2761	18.2621	23.8042	20.717	23.3255	25.8384	21.2776	23.4187	20.8929
CELSR1	1	complement(15740825..15899595)	ENSGALG00000043355	50	36	32	35	56	36	39	25	0.17151	0.118714	0.123341	0.122238	0.153975	0.148341	0.171943	0.0857245	0.452164	0.302638	0.306616	0.299908	0.407044	0.37101	0.44113	0.217361	2.22708	1.43784	1.46345	1.50072	1.76028	1.76496	2.00732	1.09272
ENSGALG00000038315	1	complement(15923203..15923583)	ENSGALG00000038315	30	19	29	14	27	36	27	28	2.29932	1.39994	2.49754	1.09251	1.65876	3.31451	2.65975	2.14526	6.06185	3.56888	6.20869	2.68044	4.38505	8.28979	6.82376	5.43949	1.33625	0.75886	1.32625	0.600288	0.848706	1.76496	1.38968	1.22385
ENSGALG00000035169	1	15963932..15972261	ENSGALG00000035169	88	58	59	65	60	55	45	69	7.93122	5.02533	5.97512	5.9647	4.33462	5.9547	5.21279	6.21658	20.9096	12.8111	14.8537	14.6343	11.4589	14.8931	13.3737	15.7626	3.91966	2.31652	2.69824	2.78705	1.88601	2.69647	2.31614	3.01592
ENSGALG00000034274	1	15993228..16013772	ENSGALG00000034274	528	469	365	354	587	401	374	526	10.9583	9.35751	8.51213	7.48048	9.76537	9.99753	9.97654	10.9129	28.8901	23.8552	21.1605	18.3532	25.8155	25.0044	25.5954	27.6705	23.518	18.7319	16.6925	15.1787	18.4515	19.6597	19.2497	22.9909
ENSGALG00000044947	1	16034418..16044142	ENSGALG00000044947	0	0	0	0	0	0	0	0	0	0	0	0	0	0	0	0	0	0	0	0	0	0	0	0	0	0	0	0	0	0	0	0
CERK	1	complement(16132582..16175969)	ENSGALG00000019397	2355	2673	2033	2251	2658	2286	1634	2331	15.6187	17.0424	15.1505	15.2001	14.1303	18.2125	13.9285	15.454	41.1766	43.4464	37.6631	37.2932	37.3545	45.5505	35.7345	39.1849	104.895	106.76	92.975	96.5177	83.5503	112.075	84.1015	101.886
TBC1D22A	1	16200283..16355412	ENSGALG00000043058	1360	1603	1245	1431	1816	1314	1216	1461	8.24108	9.33809	8.47719	8.82883	8.82071	9.56491	9.47063	8.84995	21.7265	23.8057	21.0736	21.6613	23.3182	23.9224	24.2975	22.4398	60.5766	64.0238	56.9375	61.358	57.0833	64.421	62.5871	63.8588
FAM19A5	1	17084630..17502308	ENSGALG00000023584	1	0	4	4	3	0	0	0	0.0437801	0	0.196777	0.178301	0.105279	0	0	0	0.11542	0	0.489171	0.437458	0.278312	0	0	0	0.0445416	0	0.182932	0.171511	0.0943006	0	0	0
ENSGALG00000044747	1	complement(17142166..17148629)	ENSGALG00000044747	3	1	3	28	2	13	2	2	0.241333	0.0773348	0.271178	2.29336	0.128964	1.25626	0.206788	0.160831	0.636243	0.19715	0.674127	5.6267	0.340926	3.14197	0.530528	0.407801	0.133625	0.03994	0.137199	1.20058	0.0628671	0.637346	0.102939	0.0874179
ENSGALG00000039992	1	17823677..17823940	ENSGALG00000039992	0	0	0	0	0	0	0	0	0	0	0	0	0	0	0	0	0	0	0	0	0	0	0	0	0	0	0	0	0	0	0	0
BRD1	1	complement(18747413..18806394)	ENSGALG00000029379	1171	1261	1135	1175	1819	1175	1224	1193	6.09749	6.31231	6.64091	6.22946	7.59223	7.34975	8.19173	6.20983	16.0752	16.092	16.5088	15.2838	20.0706	18.3821	21.0164	15.7455	52.1582	50.3643	51.9069	50.3813	57.1776	57.6063	62.9989	52.1448
ZBED4	1	18834835..18839285	ENSGALG00000032659	951	934	783	961	1157	768	713	960	6.23915	5.89075	5.77223	6.41928	6.08444	6.05266	6.01221	6.29595	16.4487	15.0173	14.3493	15.7496	16.0847	15.138	15.4247	15.9639	42.3591	37.304	35.8089	41.2055	36.3686	37.6525	36.6979	41.9606
ALG12	1	complement(18849407..18864906)	ENSGALG00000008539	1012	1198	1169	1034	1226	757	795	933	11.5211	13.1115	14.9543	11.9854	11.1879	10.3526	11.6327	10.618	30.374	33.4251	37.1753	29.406	29.576	25.8925	29.8445	26.9227	45.0761	47.8481	53.4618	44.3356	38.5375	37.1132	40.9184	40.7805
CRELD2	1	18865360..18876467	ENSGALG00000008551	1781	2006	1644	1733	1919	1443	1401	1492	30.6829	33.2233	31.8252	30.3983	26.5002	29.8634	31.0221	25.6949	80.8915	84.6964	79.115	74.5816	70.0554	74.69	79.5891	65.1514	79.3286	80.1196	75.1849	74.3071	60.321	70.7455	72.109	65.2138
PIM3	1	complement(19165830..19169549)	ENSGALG00000023576	551	519	546	544	953	651	525	696	8.18825	7.41457	9.11737	8.23108	11.3521	11.6215	10.0276	10.3394	21.5873	18.902	22.6651	20.1948	30.01	29.0659	25.7266	26.2163	24.5424	20.7289	24.9702	23.3255	29.9562	31.9163	27.0216	30.4214
IL17REL	1	complement(20036081..20070713)	ENSGALG00000008554	29	28	33	16	67	30	15	20	0.628218	0.583109	0.803274	0.352899	1.1634	0.780681	0.417642	0.433099	1.65622	1.48652	1.99687	0.86583	3.07554	1.95253	1.07149	1.09816	1.29171	1.11832	1.50919	0.686043	2.10605	1.4708	0.772045	0.874179
MLC1	1	complement(20087981..20104863)	ENSGALG00000040038	3	1	1	0	5	2	0	0	0.0417758	0.013387	0.0156474	0	0.0558105	0.033456	0	0	0.110137	0.0341276	0.0388981	0	0.147539	0.0836754	0	0	0.133625	0.03994	0.0457329	0	0.157168	0.0980533	0	0
ENSGALG00000033664	1	20105954..20124074	ENSGALG00000033664	2	2	2	1	5	0	1	2	0.0273805	0.0263221	0.0307665	0.0139389	0.0548686	0	0.0175959	0.0273707	0.0721851	0.0671031	0.0764832	0.0341989	0.145049	0	0.0451434	0.0694007	0.0890832	0.07988	0.0914659	0.0428777	0.157168	0	0.0514697	0.0874179
PANX2	1	20174067..20177667	ENSGALG00000000003	12	18	11	15	28	27	16	8	0.182603	0.263317	0.188086	0.2324	0.341529	0.49355	0.31293	0.121692	0.48141	0.671276	0.467568	0.570189	0.902857	1.2344	0.802842	0.30856	0.534499	0.71892	0.503062	0.643166	0.880139	1.32372	0.823515	0.349672
TRABD	1	20223866..20256165	ENSGALG00000030705	602	639	540	604	677	450	444	556	4.361	4.4501	4.39562	4.45497	3.93116	3.916	4.13402	4.02633	11.4972	11.3447	10.9272	10.9302	10.3923	9.79413	10.6061	10.2091	26.814	25.5217	24.6958	25.8981	21.2805	22.062	22.8525	24.3022
SELENOO	1	20290347..20303283	ENSGALG00000038467	1197	1296	1178	1514	1962	1246	1129	1352	6.85372	7.13372	7.57905	8.82625	9.00479	8.57019	8.30857	7.73845	18.0689	18.1861	18.8409	21.655	23.8048	21.4345	21.3161	19.6215	53.3163	51.7622	53.8734	64.9169	61.6726	61.0872	58.1093	59.0945
TUBGCP6	1	complement(20305696..20329063)	ENSGALG00000032156	758	1148	778	1060	1389	823	766	830	3.49016	5.08156	4.02525	4.96936	5.1265	4.55214	4.5332	3.82032	9.20135	12.9545	10.0065	12.1922	13.5523	11.3852	11.6302	9.68672	33.7625	45.8511	35.5802	45.4504	43.6612	40.3489	39.4258	36.2784
HDAC10	1	complement(20329726..20343807)	ENSGALG00000041251	741	1109	741	1138	1323	748	705	948	11.3586	16.3425	12.7633	17.761	16.2558	13.7737	13.8898	14.5265	29.9455	41.662	31.7285	43.5763	42.9735	34.4487	35.6352	36.8331	33.0053	44.2935	33.8881	48.7948	41.5866	36.6719	36.2861	41.4361
ENSGALG00000008635	1	complement(20345887..20349591)	ENSGALG00000008635	6	23	5	11	13	15	3	11	0.139497	0.514067	0.130623	0.26039	0.242269	0.418933	0.0896466	0.255653	0.367765	1.31051	0.324719	0.63886	0.640457	1.04777	0.229994	0.648228	0.26725	0.91862	0.228665	0.471655	0.408636	0.7354	0.154409	0.480799
MAPK12	1	complement(20367873..20396572)	ENSGALG00000019384	233	440	319	310	578	346	309	346	5.05115	9.16994	7.77075	6.8425	10.044	9.01054	8.6098	7.49818	13.3167	23.377	19.3175	16.7879	26.5519	22.5359	22.089	19.0122	10.3782	17.5736	14.5888	13.2921	18.1686	16.9632	15.9041	15.1233
MAPK11	1	complement(20405293..20435716)	ENSGALG00000040023	361	496	479	454	613	375	403	323	4.14374	5.47326	6.17814	5.3059	5.64012	5.17079	5.94553	3.70623	10.9244	13.953	15.3584	13.0179	14.9101	12.9324	15.2536	9.39746	16.0795	19.8102	21.9061	19.4665	19.2688	18.385	20.7423	14.118
PLXNB2	1	complement(20490162..20663084)	ENSGALG00000039861	7267	7159	5003	6748	8445	5403	5172	8111	36.7011	34.7581	28.3917	34.699	34.1874	32.7793	33.5724	40.949	96.7577	88.609	70.5796	85.1333	90.377	81.9828	86.1322	103.83	323.684	285.93	228.802	289.339	265.456	264.891	266.201	354.523
ZNF800	1	20872801..20886900	ENSGALG00000033997	121	199	152	153	244	123	96	146	0.68569	1.08411	0.967883	0.882779	1.10834	0.837312	0.699219	0.827066	1.80773	2.76374	2.40608	2.16588	2.92999	2.09417	1.79389	2.09709	5.38953	7.94806	6.95141	6.56029	7.66978	6.03028	4.94109	6.38151
GRM8	1	20929341..21246163	ENSGALG00000039403	0	1	1	1	16	6	3	0	0	0.00900337	0.0105236	0.00953552	0.120113	0.0675021	0.0361117	0	0	0.0229524	0.0261608	0.0233952	0.317527	0.168827	0.0926467	0	0	0.03994	0.0457329	0.0428777	0.502937	0.29416	0.154409	0
POT1	1	21741971..21804718	ENSGALG00000008740	336	391	340	287	448	330	225	251	2.21082	2.47327	2.5138	1.92272	2.36285	2.60837	1.90282	1.65095	5.82855	6.30512	6.24911	4.71734	6.24636	6.52368	4.8818	4.18612	14.966	15.6165	15.5492	12.3059	14.0822	16.1788	11.5807	10.9709
GPR37	1	21843141..21855468	ENSGALG00000040954	2	8	6	4	17	7	5	7	0.0301511	0.115942	0.101639	0.0613975	0.20543	0.126768	0.0968819	0.105491	0.0794894	0.295572	0.252667	0.150637	0.54307	0.317055	0.248557	0.267481	0.0890832	0.31952	0.274398	0.171511	0.53437	0.343187	0.257348	0.305963
ARL8BL	1	complement(22062046..22089723)	ENSGALG00000031527	167	170	240	216	237	226	239	155	4.53217	4.43525	7.31878	5.96846	5.15562	7.36781	8.33658	4.20501	11.9485	11.3068	18.1939	14.6435	13.6293	18.4273	21.388	10.6621	7.43845	6.7898	10.9759	9.26159	7.44975	11.08	12.3013	6.77489
SPAM1	1	complement(22096114..22105014)	ENSGALG00000008761	0	0	0	0	0	0	0	0	0	0	0	0	0	0	0	0	0	0	0	0	0	0	0	0	0	0	0	0	0	0	0	0
HYAL6	1	complement(22165912..22185499)	ENSGALG00000008776	4	12	3	6	17	4	6	1	0.0612187	0.176557	0.051592	0.0934961	0.208552	0.0735401	0.118025	0.0152992	0.161395	0.450097	0.128254	0.229391	0.551324	0.183928	0.302801	0.0387924	0.178166	0.47928	0.137199	0.257266	0.53437	0.196107	0.308818	0.043709
WASL	1	22209091..22259092	ENSGALG00000008797	3475	3642	3018	3186	4686	3052	2800	3635	17.2107	17.3406	16.7958	16.066	18.6033	18.1581	17.8239	17.9968	45.3739	44.2065	41.7531	39.4177	49.1791	45.4143	45.7283	45.6322	154.782	145.461	138.022	136.608	147.298	149.629	144.115	158.882
LMOD2	1	complement(22277626..22283778)	ENSGALG00000008805	0	0	0	0	0	0	0	0	0	0	0	0	0	0	0	0	0	0	0	0	0	0	0	0	0	0	0	0	0	0	0	0
ASB15	1	complement(22292930..22303384)	ENSGALG00000008814	1	1	1	1	1	2	0	2	0.0157504	0.0151416	0.0176982	0.0160365	0.0126251	0.037841	0	0.0314896	0.041524	0.0386006	0.0439964	0.0393453	0.0333754	0.0946425	0	0.0798445	0.0445416	0.03994	0.0457329	0.0428777	0.0314335	0.0980533	0	0.0874179
NDUFA5	1	22307520..22312663	ENSGALG00000008821	1754	1937	1695	1958	1897	1746	1446	1774	42.0173	44.6074	45.6253	47.7562	36.4257	50.2439	44.5212	42.4813	110.773	113.718	113.421	117.169	96.2941	125.663	114.222	107.715	78.126	77.3638	77.5173	83.9546	59.6294	85.6005	74.4252	77.5397
IQUB	1	22315243..22335010	ENSGALG00000008823	28	21	32	22	35	32	31	41	0.376965	0.271795	0.484094	0.301567	0.377705	0.517527	0.536419	0.551787	0.993819	0.692888	1.20342	0.739888	0.998492	1.29436	1.37622	1.3991	1.24716	0.83874	1.46345	0.94331	1.10017	1.56885	1.59556	1.79207
ATP6AP1	1	22343252..22397263	ENSGALG00000008836	4146	4944	4263	5296	5414	4096	3485	4130	52.9841	60.7398	61.2165	68.91	55.4596	62.8805	57.2425	52.7608	139.686	154.845	152.179	169.069	146.612	157.268	146.859	133.779	184.669	197.463	194.959	227.08	170.181	200.813	179.372	180.518
SLC13A1	1	22423984..22448101	ENSGALG00000008874	2399	1769	1327	1608	1737	1654	1304	2603	38.5335	27.3159	23.9506	26.2974	22.3641	31.9142	26.9207	41.7953	101.589	69.6366	59.5393	64.5201	59.121	79.8192	69.0667	105.975	106.855	70.6539	60.6876	68.9474	54.6001	81.0901	67.1165	113.774
CADPS2	1	22528298..22829235	ENSGALG00000008926	181	194	167	166	253	203	155	181	1.35212	1.39321	1.40181	1.26259	1.51495	1.82168	1.48822	1.35164	3.56469	3.55173	3.4848	3.09774	4.00489	4.55613	3.81813	3.42719	8.06203	7.74836	7.6374	7.1177	7.95269	9.95241	7.9778	7.91132
FEZF1	1	22837471..22839677	ENSGALG00000008941	0	0	0	0	0	1	2	0	0	0	0	0	0	0.0259842	0.055603	0	0	0	0	0	0	0.0649879	0.142653	0	0	0	0	0	0	0.0490266	0.102939	0
AASS	1	22867946..22895501	ENSGALG00000008953	94	132	105	154	171	102	127	73	0.757011	1.02194	0.95017	1.26274	1.10386	0.986767	1.31455	0.587682	1.99576	2.60525	2.36205	3.0981	2.91813	2.46796	3.37257	1.49012	4.18691	5.27208	4.80196	6.60317	5.37514	5.00072	6.53665	3.19075
PTPRZ1	1	complement(22901214..23034777)	ENSGALG00000040114	26	53	52	74	117	46	66	51	0.0923081	0.180893	0.207447	0.267495	0.332962	0.196184	0.301169	0.181001	0.243358	0.461151	0.515697	0.656294	0.88021	0.490668	0.772668	0.458943	1.15808	2.11682	2.37811	3.17295	3.67772	2.25523	3.397	2.22916
FAM3C	1	23210197..23238757	ENSGALG00000008975	2367	2923	2592	2765	3446	2150	2143	2596	38.6791	45.9183	47.5938	46.0035	45.1373	42.2043	45.0091	42.406	101.972	117.06	118.314	112.869	119.324	105.555	115.474	107.524	105.43	116.745	118.54	118.557	108.32	105.407	110.3	113.468
WNT16	1	complement(23246190..23256408)	ENSGALG00000028069	5	20	3	2	9	8	4	3	0.0958048	0.368406	0.0645916	0.0390181	0.13823	0.18414	0.0985093	0.0574624	0.252577	0.93918	0.16057	0.0957299	0.365421	0.460544	0.252732	0.145701	0.222708	0.7988	0.137199	0.0857554	0.282902	0.392213	0.205879	0.131127
ENSGALG00000032262	1	complement(23274409..23341146)	ENSGALG00000032262	76	107	79	85	178	75	82	66	1.4975	2.02683	1.74912	1.70526	2.81136	1.77523	2.07667	1.3	3.94797	5.16701	4.34816	4.18382	7.43204	4.43996	5.32783	3.29625	3.38516	4.27358	3.6129	3.64461	5.59517	3.677	4.22051	2.88479
ENSGALG00000009002	1	complement(23342831..23412785)	ENSGALG00000009002	79	125	92	91	205	80	77	79	1.1443	1.74061	1.4974	1.34206	2.38017	1.39201	1.43352	1.14389	3.01679	4.43734	3.72241	3.29271	6.29216	3.48149	3.67777	2.90042	3.51879	4.9925	4.20743	3.90187	6.44388	3.92213	3.96317	3.45301
ING3	1	complement(23427327..23445706)	ENSGALG00000009023	406	508	497	577	751	488	497	455	5.55824	6.68581	7.64549	8.04277	8.24126	8.02549	8.74516	6.22684	14.6536	17.0442	19.0061	19.7327	21.7864	20.0722	22.4363	15.7887	18.0839	20.2895	22.7293	24.7404	23.6066	23.925	25.5804	19.8876
TSPAN12	1	23467910..23513135	ENSGALG00000009029	471	657	547	655	959	540	558	543	5.4557	7.316	7.11958	7.72483	8.90411	7.51386	8.30737	6.28745	14.3832	18.6507	17.6987	18.9527	23.5387	18.7926	21.3131	15.9423	20.9791	26.2406	25.0159	28.0849	30.1448	26.4744	28.7201	23.734
KCND2_1	1	complement(23521476..23537732)	ENSGALG00000043515	5	7	5	9	18	8	7	5	0.175068	0.235621	0.196718	0.320846	0.505186	0.336486	0.315017	0.175005	0.461543	0.60067	0.489025	0.787189	1.3355	0.841569	0.808196	0.44374	0.222708	0.27958	0.228665	0.385899	0.565804	0.392213	0.360288	0.218545
KCND2_2	1	complement(23783751..23786181)	ENSGALG00000009066	3	15	6	12	14	9	11	4	0.0629791	0.302723	0.141535	0.256493	0.235584	0.226964	0.296803	0.0839422	0.166036	0.771734	0.351845	0.629299	0.622783	0.567651	0.761466	0.212842	0.133625	0.5991	0.274398	0.514533	0.44007	0.44124	0.566166	0.174836
ANKRD26	1	24294540..24342686	ENSGALG00000009104	230	577	424	484	490	327	357	383	0.75762	1.82717	1.56937	1.62326	1.29378	1.29393	1.51144	1.26115	1.99737	4.65801	3.90134	3.98262	3.42022	3.2362	3.8777	3.19775	10.2446	23.0454	19.3908	20.7528	15.4024	16.0317	18.3747	16.7405
LSM8	1	complement(24348924..24354638)	ENSGALG00000009110	179	240	245	222	276	185	166	202	8.16724	10.5272	12.561	10.3132	10.0942	10.1399	9.73488	9.21338	21.5319	26.8371	31.2258	25.3032	26.6849	25.3605	24.9754	23.3613	7.97295	9.5856	11.2046	9.51885	8.67566	9.06993	8.54397	8.82921
CTTNBP2	1	24474948..24550085	ENSGALG00000009134	487	625	624	528	999	459	580	580	2.73114	3.36956	3.93221	3.01486	4.49079	3.0922	4.18064	3.25153	7.20029	8.59006	9.77516	7.39689	11.8717	7.73377	10.7257	8.24452	21.6918	24.9625	28.5373	22.6394	31.4021	22.5032	29.8524	25.3512
CFTR	1	complement(24554513..24638605)	ENSGALG00000032986	3097	3446	3929	3802	5790	3798	3395	4154	18.1381	19.4019	25.8565	22.6715	27.1813	26.7205	25.5558	24.3199	47.8187	49.4614	64.2771	55.624	71.8559	66.8296	65.5651	61.6651	137.945	137.633	179.685	163.021	182	186.203	174.74	181.567
ASZ1	1	24658278..24693248	ENSGALG00000034574	0	0	0	0	0	0	0	0	0	0	0	0	0	0	0	0	0	0	0	0	0	0	0	0	0	0	0	0	0	0	0	0
WNT2	1	24699097..24712426	ENSGALG00000030173	2	4	10	5	13	5	7	9	0.0423207	0.0813696	0.237772	0.107724	0.2205	0.127096	0.19038	0.190375	0.111573	0.207436	0.591082	0.264298	0.582908	0.317875	0.488432	0.482712	0.0890832	0.15976	0.457329	0.214389	0.408636	0.245133	0.360288	0.393381
ST7	1	complement(24716503..24853831)	ENSGALG00000037206	498	540	424	500	535	448	414	481	6.97805	7.27407	6.67587	7.13334	6.00898	7.54089	7.45598	6.73744	18.3967	18.5438	16.5957	17.5015	15.8852	18.8602	19.1288	17.0833	22.1817	21.5676	19.3908	21.4389	16.8169	21.9639	21.3084	21.024
CAPZA2	1	complement(24865850..24895638)	ENSGALG00000043437	5419	6324	6133	6381	6830	5024	4787	5601	53.0835	59.554	67.5073	63.6425	53.6295	59.1194	60.2704	54.8468	139.948	151.822	167.818	156.145	141.773	147.861	154.627	139.068	241.371	252.581	280.48	273.603	214.691	246.31	246.385	244.814
MET	1	complement(24918557..25006337)	ENSGALG00000036883	316	389	327	387	499	301	359	365	1.43889	1.70282	1.67312	1.7942	1.82131	1.64645	2.10105	1.66142	3.79345	4.34102	4.15923	4.40202	4.81477	4.11786	5.39036	4.21266	14.0751	15.5367	14.9547	16.5937	15.6853	14.757	18.4776	15.9538
CAV1	1	complement(25060566..25074918)	ENSGALG00000043287	783	944	1090	961	1169	661	1176	733	37.9811	44.0207	59.4114	47.4622	45.453	38.5166	73.3184	35.5431	100.132	112.222	147.692	116.447	120.158	96.3321	188.103	90.1223	34.8761	37.7034	49.8489	41.2055	36.7458	32.4066	60.5283	32.0387
CAV2	1	complement(25079044..25090122)	ENSGALG00000033295	575	751	633	737	974	477	1070	498	3.60008	4.52025	4.45333	4.69818	4.88816	3.58759	8.61048	3.11687	9.49113	11.5235	11.0706	11.5269	12.9222	8.97276	22.0907	7.90307	25.6114	29.9949	28.9489	31.6009	30.6163	23.3857	55.0726	21.7671
TES	1	complement(25175213..25201500)	ENSGALG00000031934	2332	3232	2536	2960	3748	3018	2842	2713	24.5219	32.6721	29.9649	31.691	31.5914	38.1229	38.4105	28.5182	64.6489	83.2912	74.4904	77.7532	83.5141	95.3475	98.5447	72.3101	103.871	129.086	115.979	126.918	117.813	147.962	146.277	118.582
TFEC	1	25289169..25351175	ENSGALG00000040557	24	31	25	20	43	17	12	12	0.482334	0.598932	0.564565	0.409246	0.692704	0.410417	0.309969	0.241081	1.27161	1.52686	1.40346	1.00408	1.83121	1.02648	0.795244	0.61128	1.069	1.23814	1.14332	0.857554	1.35164	0.833453	0.617636	0.524507
MDFIC	1	complement(25768091..25813067)	ENSGALG00000026838	68	73	79	74	132	68	120	67	2.47284	2.55205	3.22813	2.73991	3.84772	2.97054	5.60878	2.4356	6.51932	6.50595	8.02488	6.72231	10.1717	7.4295	14.3897	6.17567	3.02883	2.91562	3.6129	3.17295	4.14923	3.33381	6.17636	2.9285
FOXP2	1	complement(25908850..26098946)	ENSGALG00000009424	232	318	267	279	417	239	268	326	1.77627	2.3406	2.29705	2.17492	2.55918	2.19816	2.63728	2.49508	4.68291	5.96692	5.71028	5.33613	6.76537	5.49773	6.76611	6.32648	10.3337	12.7009	12.2107	11.9629	13.1078	11.7174	13.7939	14.2491
PPP1R3A	1	26361986..26387951	ENSGALG00000009435	0	0	0	0	0	0	0	0	0	0	0	0	0	0	0	0	0	0	0	0	0	0	0	0	0	0	0	0	0	0	0	0
GPR85	1	26678474..26679586	ENSGALG00000009439	44	62	58	51	113	51	61	42	1.15441	1.56379	1.70991	1.36237	2.37645	1.60738	2.05701	1.10154	3.04345	3.98658	4.25069	3.34255	6.28231	4.02014	5.27739	2.79305	1.95983	2.47628	2.65251	2.18676	3.55199	2.50036	3.13965	1.83578
BMT2	1	26768477..26802391	ENSGALG00000009440	471	472	420	584	726	564	500	525	3.48463	3.35704	3.49158	4.39913	4.30541	5.0125	4.7545	3.88275	9.18676	8.55812	8.67979	10.7932	11.3817	12.5365	12.198	9.84503	20.9791	18.8517	19.2078	25.0406	22.8207	27.651	25.7348	22.9472
ENSGALG00000009443	1	26780685..26827520	ENSGALG00000009443	522	414	424	448	660	398	392	452	4.97652	3.79433	4.54212	4.34862	5.04361	4.55804	4.80332	4.30764	13.1199	9.67291	11.2913	10.6692	13.3332	11.3999	12.3232	10.9224	23.2507	16.5352	19.3908	19.2092	20.7461	19.5126	20.1761	19.7564
LSMEM1	1	complement(26908732..26912859)	ENSGALG00000009446	20	18	37	20	21	9	11	15	1.22437	1.05934	2.54521	1.24661	1.03049	0.661861	0.865519	0.917953	3.2279	2.70058	6.32718	3.05854	2.72419	1.65535	2.22054	2.32754	0.890832	0.71892	1.69212	0.857554	0.660104	0.44124	0.566166	0.655634
IFRD1	1	complement(26917109..26927702)	ENSGALG00000009448	3990	4192	3399	3674	4587	3187	3078	3264	53.4464	53.9816	51.1604	50.1076	49.2512	51.2824	52.9925	43.706	140.905	137.616	127.181	122.938	130.199	128.26	135.956	110.82	177.721	167.428	155.446	157.533	144.186	156.248	158.424	142.666
ZNF277	1	complement(26968441..27022185)	ENSGALG00000009454	195	271	235	300	328	254	295	250	3.80124	5.07854	5.14749	5.95429	5.12515	5.94791	7.39116	4.87165	10.0215	12.9468	12.7963	14.6087	13.5487	14.8761	18.9625	12.3524	8.68561	10.8237	10.7472	12.8633	10.3102	12.4528	15.1836	10.9272
DOCK4	1	27184787..27262852	ENSGALG00000009480	263	360	276	203	257	355	281	220	1.93206	2.54242	2.2783	1.51838	1.51335	3.13281	2.65321	1.6156	5.09363	6.4814	5.66368	3.7253	4.00066	7.83533	6.80697	4.09648	11.7144	14.3784	12.6223	8.70418	8.07842	17.4045	14.463	9.61597
ENSGALG00000009485	1	27299899..27307305	ENSGALG00000009485	29	33	29	40	36	19	30	53	2.49805	2.73272	2.80697	3.50817	2.48569	1.96606	3.32142	4.56377	6.58578	6.96655	6.97791	8.60722	6.57111	4.91722	8.52131	11.5718	1.29171	1.31802	1.32625	1.71511	1.13161	0.931506	1.54409	2.31657
LRRN3	1	complement(27489968..27492094)	ENSGALG00000009488	16	9	5	11	7	7	11	9	0.219662	0.118784	0.0771333	0.153761	0.0770327	0.115444	0.194101	0.123516	0.57911	0.302816	0.191747	0.377249	0.203642	0.288733	0.497978	0.313184	0.712666	0.35946	0.228665	0.471655	0.220035	0.343187	0.566166	0.393381
ENSGALG00000027876	1	27601853..27750489	ENSGALG00000027876	72	85	71	87	112	33	44	77	3.31101	3.75774	3.6688	4.07348	4.12847	1.82298	2.60065	3.53968	8.72906	9.57963	9.12035	9.9942	10.9139	4.55938	6.67212	8.97515	3.207	3.3949	3.24704	3.73036	3.52056	1.61788	2.26467	3.36559
DNAJB9	1	complement(28438278..28446016)	ENSGALG00000009492	1024	1248	878	968	960	895	788	1052	12.1751	14.2649	11.7302	11.7184	9.14929	12.7831	12.042	12.5036	32.0982	36.3655	29.1604	28.7508	24.1868	31.9713	30.8946	31.7039	45.6106	49.8451	40.1535	41.5056	30.1762	43.8789	40.5581	45.9818
THAP5	1	28446182..28454715	ENSGALG00000009494	300	341	370	348	465	246	279	297	3.22429	3.52327	4.4684	3.80812	4.00597	3.17605	3.85405	3.19091	8.50042	8.9819	11.1081	9.34313	10.5901	7.94349	9.8878	8.0908	13.3625	13.6195	16.9212	14.9214	14.6166	12.0606	14.36	12.9816
AVPR2	1	complement(28505731..28507926)	ENSGALG00000009497	9	17	9	18	21	7	13	11	0.236129	0.428781	0.26533	0.480837	0.44164	0.22062	0.43838	0.288499	0.622524	1.09309	0.65959	1.17972	1.16751	0.551784	1.12469	0.731514	0.400874	0.67898	0.411596	0.771799	0.660104	0.343187	0.669106	0.480799
PNPLA8	1	28527080..28561125	ENSGALG00000009505	1253	1485	1176	1586	2007	1455	1457	1536	11.1689	12.7252	11.7789	14.3939	14.34	15.5798	16.6924	13.6866	29.4453	32.4404	29.2813	35.3152	37.9088	38.9659	42.8253	34.7034	55.8106	59.3109	53.7819	68.0041	63.0871	71.3338	74.9913	67.137
NRCAM	1	28579093..28718391	ENSGALG00000009514	30	31	28	38	128	29	32	40	0.19279	0.191516	0.20219	0.248637	0.65935	0.223873	0.26431	0.256962	0.508267	0.488233	0.502628	0.610025	1.74304	0.55992	0.678104	0.651548	1.33625	1.23814	1.28052	1.62935	4.02349	1.42177	1.64703	1.74836
CNTN1	1	28757424..28995706	ENSGALG00000009523	274	355	207	357	378	218	450	232	1.4508	1.80703	1.23159	1.92461	1.60432	1.38661	3.06245	1.22798	3.82484	4.60666	3.06162	4.72199	4.24114	3.46798	7.85691	3.11363	12.2044	14.1787	9.46672	15.3073	11.8819	10.6878	23.1614	10.1405
PDZRN4	1	29041613..29287618	ENSGALG00000009530	5	5	7	9	9	7	17	11	0.052615	0.0505811	0.0827703	0.0964273	0.0759144	0.0884866	0.229926	0.115712	0.138713	0.128947	0.20576	0.236582	0.200685	0.22131	0.58989	0.293396	0.222708	0.1997	0.320131	0.385899	0.282902	0.343187	0.874985	0.480799
GXYLT1	1	complement(29464172..29495190)	ENSGALG00000009532	376	477	466	431	597	365	365	393	3.57994	4.36602	4.98553	4.17815	4.55623	4.17466	4.46664	3.74047	9.43806	11.1303	12.3936	10.251	12.0447	10.4411	11.4595	9.48426	16.7476	19.0514	21.3115	18.4803	18.7658	17.8947	18.7864	17.1776
YAF2	1	complement(29508386..29535325)	ENSGALG00000009540	445	438	403	378	516	344	322	438	5.173	4.89481	5.26411	4.47397	4.80811	4.80376	4.81104	5.08981	13.6379	12.4784	13.0862	10.9768	12.7106	12.0145	12.343	12.9056	19.821	17.4937	18.4304	16.2078	16.2197	16.8652	16.5732	19.1445
ENSGALG00000040505	1	complement(29549181..29550317)	ENSGALG00000040505	0	1	0	1	1	0	1	1	0	0.0519861	0	0.0550588	0.0433462	0	0.0695038	0.0540572	0	0.132529	0	0.135086	0.114589	0	0.178316	0.137066	0	0.03994	0	0.0428777	0.0314335	0	0.0514697	0.043709
ZCRB1	1	complement(29565648..29577484)	ENSGALG00000009544	529	571	563	562	801	516	578	533	9.77071	10.1388	11.6847	10.5688	11.8589	11.4488	13.7214	9.84108	25.7592	25.8469	29.0471	25.9303	31.3499	28.6341	35.2031	24.9529	23.5625	22.8057	25.7476	24.0973	25.1783	25.2978	29.7495	23.2969
PPHLN1	1	29577530..29714435	ENSGALG00000009547	470	465	477	447	643	375	409	417	4.06776	3.86892	4.63888	3.93897	4.46078	3.89878	4.54968	3.60777	10.7241	9.86306	11.5319	9.66418	11.7924	9.75107	11.6725	9.14778	20.9346	18.5721	21.8146	19.1663	20.2118	18.385	21.0511	18.2266
PRICKLE1	1	complement(29649659..29708429)	ENSGALG00000009556	252	397	348	244	533	302	409	273	2.46276	3.72985	3.82154	2.42789	4.17533	3.54543	5.13742	2.66704	6.49275	9.50853	9.50004	5.95678	11.0378	8.86732	13.1804	6.76249	11.2245	15.8562	15.9151	10.4622	16.7541	14.806	21.0511	11.9325
ADAMTS20	1	complement(29925304..30007946)	ENSGALG00000009572	11	36	11	25	33	7	24	12	0.0542959	0.170827	0.0610104	0.125641	0.130566	0.0415061	0.15226	0.0592108	0.143144	0.43549	0.151667	0.308258	0.345161	0.103809	0.390632	0.150134	0.489958	1.43784	0.503062	1.07194	1.03731	0.343187	1.23527	0.524507
PUS7L	1	complement(30059683..30069488)	ENSGALG00000009577	176	238	233	232	341	158	123	197	2.54301	3.30592	3.78294	3.41305	3.94941	2.74242	2.28424	2.84543	6.70432	8.4278	9.40408	8.37383	10.4406	6.85894	5.86035	7.21481	7.83932	9.50572	10.6558	9.94763	10.7188	7.74621	6.33077	8.61066
IRAK4	1	30069844..30081296	ENSGALG00000009586	569	1082	819	815	1359	568	641	687	6.40785	11.714	10.3638	9.34492	12.2677	7.68402	9.27807	7.73396	16.8935	29.8626	25.7637	22.9276	32.4305	19.2182	23.8035	19.6101	25.3442	43.2151	37.4553	34.9453	42.7182	27.8471	32.9921	30.0281
TWF1	1	complement(30082534..30100993)	ENSGALG00000009595	7589	8882	8251	9202	11059	6615	7080	9038	53.6713	60.3875	65.5694	66.261	62.6925	56.1988	64.3562	63.8962	141.497	153.946	163	162.57	165.732	140.557	165.11	162.014	338.026	354.747	377.342	394.561	347.624	324.311	364.405	395.042
TMEM117	1	30142719..30308483	ENSGALG00000009596	24	17	18	14	8	19	21	16	0.634811	0.432276	0.534987	0.377033	0.169616	0.603708	0.713925	0.423057	1.6736	1.102	1.32993	0.925042	0.448391	1.50991	1.83162	1.07269	1.069	0.67898	0.823193	0.600288	0.251468	0.931506	1.08086	0.699343
NELL2	1	complement(30342085..30485295)	ENSGALG00000009601	952	810	1092	990	1893	797	765	688	8.30584	6.79377	10.7055	8.79428	13.2385	8.35305	8.57843	6.0004	21.8973	17.3194	26.613	21.5766	34.997	20.8915	22.0085	15.2145	42.4036	32.3514	49.9404	42.4489	59.5037	39.0742	39.3743	30.0718
PRLL	1	30529790..30533660	ENSGALG00000009603	2	0	0	0	0	0	0	0	0.0476367	0	0	0	0	0	0	0	0.125588	0	0	0	0	0	0	0	0.0890832	0	0	0	0	0	0	0
DBX2	1	complement(30540025..30560231)	ENSGALG00000009604	4	0	1	0	3	1	4	0	0.0524025	0	0.0147207	0	0.0315033	0.0157374	0.0673523	0	0.138152	0	0.0365946	0	0.0832813	0.0393601	0.172796	0	0.178166	0	0.0457329	0	0.0943006	0.0490266	0.205879	0
ANO6	1	30560077..30668939	ENSGALG00000009638	239	283	183	264	311	163	219	218	1.15644	1.31641	0.994978	1.30061	1.20622	0.947442	1.36198	1.05445	3.0488	3.35593	2.47344	3.19102	3.18874	2.36961	3.49423	2.67365	10.6454	11.303	8.36913	11.3197	9.77583	7.99134	11.2719	9.52855
ARID2	1	30752198..30856043	ENSGALG00000033074	835	731	706	738	1195	712	644	809	4.268	3.59198	4.0549	3.84072	4.89608	4.37178	4.23081	4.13363	11.252	9.15707	10.0802	9.42312	12.9431	10.9341	10.8544	10.4812	37.1922	29.1961	32.2874	31.6438	37.5631	34.907	33.1465	35.3605
SCAF11	1	complement(30864013..30895009)	ENSGALG00000028849	3393	3907	3190	3704	4554	3384	2976	3535	14.5343	16.0891	15.3545	16.1547	15.6367	17.4132	16.3848	15.1371	38.3177	41.016	38.1702	39.6351	41.3367	43.5515	42.0363	38.3814	151.13	156.046	145.888	158.819	143.148	165.906	153.174	154.511
SLC38A1	1	complement(30936731..30961242)	ENSGALG00000009698	275	282	249	210	340	171	204	242	4.6125	4.54707	4.69289	3.58625	4.57114	3.4454	4.39778	4.05755	12.1603	11.5919	11.6661	8.79879	12.0842	8.61714	11.2828	10.2882	12.2489	11.2631	11.3875	9.00432	10.6874	8.38356	10.4998	10.5776
SLC38A2	1	complement(30985306..31000366)	ENSGALG00000008497	2195	2945	2316	2690	3667	2088	2230	2199	12.3572	15.9386	14.6508	15.419	16.5478	14.1207	16.1358	12.3753	32.5782	40.6324	36.4208	37.8302	43.7452	35.3167	41.3974	31.3786	97.7688	117.623	105.917	115.341	115.267	102.368	114.777	96.116
SLC38A4	1	complement(31101534..31122087)	ENSGALG00000009730	534	690	577	538	907	446	524	546	4.41117	5.4795	5.35582	4.52495	6.00569	4.42576	5.56345	4.50869	11.6295	13.9689	13.3141	11.1019	15.8765	11.0691	14.2734	11.4322	23.7852	27.5586	26.3879	23.0682	28.5102	21.8659	26.9701	23.8651
AMIGO2	1	complement(31248896..31258419)	ENSGALG00000009739	385	475	332	421	672	303	390	353	6.04436	7.16906	5.85686	6.72961	8.4567	5.71442	7.86962	5.53999	15.9352	18.2761	14.5597	16.5109	22.3559	14.2921	20.19	14.0471	17.1485	18.9715	15.1833	18.0515	21.1233	14.8551	20.0732	15.4293
RPAP3	1	complement(31426792..31441729)	ENSGALG00000009743	299	470	431	441	567	339	454	359	3.35944	5.0766	5.4414	5.0449	5.10648	4.57547	6.5562	4.03214	8.85673	12.9418	13.5269	12.3776	13.4994	11.4435	16.8203	10.2238	13.3179	18.7718	19.7109	18.9091	17.8228	16.62	23.3672	15.6915
ATP23	1	31441878..31449081	ENSGALG00000009747	621	676	671	735	821	700	510	702	16.0763	16.8236	19.5188	19.3731	17.0364	21.7686	16.9693	18.1667	42.3829	42.8885	48.5222	47.5314	45.0371	54.4446	43.5357	46.0631	27.6603	26.9994	30.6868	31.5151	25.8069	34.3187	26.2495	30.6837
LRIG3	1	complement(31721261..31765031)	ENSGALG00000009755	254	402	263	379	409	332	289	312	1.82016	2.76936	2.11772	2.76524	2.34931	2.85794	2.66178	2.23498	4.7986	7.05996	5.26447	6.78444	6.21058	7.14787	6.82897	5.66698	11.3136	16.0559	12.0278	16.2507	12.8563	16.2768	14.8747	13.6372
SLC16A7	1	32086287..32120482	ENSGALG00000009759	140	115	150	79	170	81	99	130	1.53865	1.21503	1.85242	0.884008	1.49762	1.06939	1.39845	1.42823	4.05644	3.09749	4.60497	2.16889	3.95907	2.6746	3.5878	3.6214	6.23582	4.5931	6.85994	3.38734	5.3437	3.97116	5.0955	5.68216
FAM19A2	1	complement(32729364..32758798)	ENSGALG00000019361	0	1	0	0	1	0	1	0	0	0.0663653	0	0	0.0553356	0	0.0887283	0	0	0.169186	0	0	0.146284	0	0.227638	0	0	0.03994	0	0	0.0314335	0	0.0514697	0
USP15	1	32905460..32969236	ENSGALG00000030024	1318	1538	1446	1585	2138	1282	1247	1353	8.19402	9.19215	10.1015	10.033	10.6545	9.57436	9.96433	8.40862	21.6025	23.4336	25.1116	24.6157	28.1659	23.946	25.5641	21.3207	58.7058	61.4277	66.1298	67.9612	67.2049	62.8522	64.1827	59.1382
MON2	1	32983622..33058180	ENSGALG00000009795	1545	1604	1470	1486	2325	1376	1402	1407	6.87744	6.86407	7.35281	6.73497	8.29591	7.35795	8.02133	6.26091	18.1315	17.4986	18.2785	16.5241	21.9308	18.4027	20.5792	15.8751	68.8168	64.0638	67.2274	63.7163	73.083	67.4607	72.1605	61.4985
PPM1H	1	complement(33089980..33218417)	ENSGALG00000009805	194	187	152	183	267	176	165	205	3.6954	3.42437	3.25343	3.54919	4.07675	4.02729	4.03965	3.90355	9.74245	8.72977	8.08776	8.70786	10.7772	10.0725	10.364	9.89775	8.64107	7.46878	6.95141	7.84662	8.39276	8.62869	8.4925	8.96034
AVPR1A	1	complement(33298676..33301273)	ENSGALG00000040567	5	9	8	4	20	18	6	12	0.116155	0.200997	0.208831	0.0946118	0.372425	0.502319	0.179151	0.278672	0.306227	0.512402	0.519136	0.232128	0.984534	1.25633	0.459622	0.706595	0.222708	0.35946	0.365863	0.171511	0.628671	0.88248	0.308818	0.524507
TMEM5	1	33395407..33407028	ENSGALG00000009815	198	290	233	291	415	297	279	250	2.70307	3.806	3.57425	4.04485	4.54132	4.87066	4.89549	3.41175	7.12628	9.70266	8.8853	9.92396	12.0053	12.1818	12.5597	8.65076	8.81924	11.5826	10.6558	12.4774	13.0449	14.5609	14.36	10.9272
SRGAP1	1	33440188..33580652	ENSGALG00000009825	338	301	309	296	478	245	237	305	1.55483	1.3311	1.59721	1.38636	1.76253	1.35385	1.40124	1.40252	4.0991	3.39339	3.97053	3.4014	4.65937	3.38606	3.59498	3.55621	15.0551	12.0219	14.1315	12.6918	15.0252	12.0115	12.1983	13.3312
C12orf66	1	complement(33594888..33606303)	ENSGALG00000027682	8041	8243	8483	9249	11008	7139	7192	8197	90.8699	89.5518	107.72	106.42	99.715	96.9142	104.462	92.5998	239.567	228.295	267.783	261.099	263.604	242.388	268.005	234.794	358.159	329.225	387.952	396.576	346.02	350.001	370.17	358.282
XPOT	1	33607081..33632184	ENSGALG00000009835	1924	2327	2070	2441	3019	1855	1952	2210	15.925	18.5161	19.2522	20.5712	20.0299	18.4441	20.766	18.2857	41.9841	47.2032	47.8595	50.471	52.9506	46.1298	53.2766	46.3648	85.698	92.9404	94.6672	104.665	94.8979	90.9444	100.469	96.5968
TBK1	1	33641818..33664801	ENSGALG00000009840	1660	1936	1762	1955	2739	1688	1609	1727	11.2495	12.6128	13.4174	13.4893	14.8785	13.7416	14.0146	11.6994	29.6579	32.1538	33.3546	33.0958	39.3325	34.3686	35.9554	29.6648	73.9391	77.3238	80.5814	83.8259	86.0965	82.757	82.8147	75.4854
RASSF3	1	33715725..33766463	ENSGALG00000009842	10951	13116	10461	12273	15044	10009	9969	11675	94.0816	108.326	100.986	107.354	103.599	103.296	110.079	100.266	248.034	276.156	251.043	263.392	273.872	258.348	282.413	254.232	487.775	523.853	478.412	526.238	472.886	490.708	513.101	510.302
GNS	1	complement(33772628..33793177)	ENSGALG00000009856	8843	9366	8585	8841	11559	7401	7425	8785	48.953	49.844	53.402	49.831	51.2912	49.2165	52.8295	48.6146	129.058	127.068	132.753	122.259	135.592	123.093	135.537	123.266	393.881	374.078	392.617	379.082	363.34	362.846	382.162	383.983
TBC1D30	1	33794056..33841926	ENSGALG00000009859	763	1062	856	922	1152	736	759	886	8.14052	10.8926	10.2622	10.0156	9.85195	9.43291	10.408	9.44945	21.4614	27.7686	25.5109	24.573	26.0444	23.5922	26.7025	23.9598	33.9852	42.4163	39.1474	39.5333	36.2114	36.0836	39.0655	38.7261
WIF1	1	complement(33881874..33923658)	ENSGALG00000039209	62	161	145	126	251	61	80	58	0.966105	2.41178	2.53886	1.99904	3.13508	1.14183	1.60222	0.903454	2.54701	6.14837	6.31139	4.9046	8.28782	2.85579	4.1106	2.29078	2.76158	6.43034	6.63127	5.40259	7.88982	2.99063	4.11757	2.53512
LEMD3	1	33937632..33977276	ENSGALG00000009873	497	565	411	428	720	494	398	529	6.04962	6.61149	5.62149	5.30437	7.02501	7.22336	6.22666	6.43684	15.949	16.8547	13.9746	13.0142	18.5711	18.066	15.9749	16.3211	22.1372	22.5661	18.7962	18.3517	22.6321	24.2192	20.4849	23.122
MSRB3	1	33986861..34070695	ENSGALG00000026661	1451	2371	2672	2236	3408	1791	2248	1771	10.4853	16.4712	21.6964	16.4514	19.7404	15.5471	20.879	12.7931	27.6431	41.99	53.9355	40.3632	52.1851	38.8842	53.5664	32.438	64.6299	94.6977	122.198	95.8746	107.126	87.8067	115.704	77.4086
HMGA2	1	34203987..34308540	ENSGALG00000009875	21	27	29	24	21	17	22	23	1.28022	1.58238	1.98656	1.48969	1.02619	1.24496	1.72381	1.40165	3.37514	4.03396	4.93843	3.65492	2.71281	3.11372	4.42254	3.554	0.935374	1.07838	1.32625	1.02907	0.660104	0.833453	1.13233	1.00531
LLPH	1	complement(34366644..34369315)	ENSGALG00000019358	475	688	587	636	708	526	482	531	16.5323	23.0201	22.957	22.538	19.7522	21.9921	21.5619	18.4748	43.5853	58.6854	57.0694	55.2965	52.2165	55.0034	55.3184	46.8444	21.1573	27.4787	26.8452	27.2702	22.2549	25.788	24.8084	23.2095
ENSGALG00000009879	1	complement(34369405..34377556)	ENSGALG00000009879	1642	1762	1823	1860	2423	1656	1639	1712	23.9743	24.7319	29.9086	27.6505	28.3575	29.0451	30.7575	24.9874	63.205	63.0492	74.3504	67.84	74.9652	72.6434	78.9103	63.3576	73.1373	70.3743	83.3711	79.7526	76.1635	81.1881	84.3588	74.8297
HELB	1	34415870..34428812	ENSGALG00000009885	728	1064	742	782	1116	653	623	677	6.83995	9.61041	7.83362	7.48077	8.40481	7.37012	7.52332	6.35851	18.0326	24.4999	19.4738	18.3539	22.2187	18.4331	19.3015	16.1225	32.4263	42.4962	33.9338	33.5304	35.0798	32.0144	32.0656	29.591
GRIP1	1	complement(34431194..34578266)	ENSGALG00000009895	17	12	10	16	31	23	19	8	0.144519	0.0980699	0.0955241	0.138489	0.211242	0.234879	0.207601	0.0679846	0.381005	0.25001	0.237465	0.339778	0.558433	0.587445	0.532613	0.17238	0.757207	0.47928	0.457329	0.686043	0.97444	1.12761	0.977924	0.349672
ENSGALG00000033879	1	34799500..34801222	ENSGALG00000033879	286	226	183	216	276	152	192	259	11.3165	8.59673	8.13644	8.70198	8.75382	7.22486	9.76444	10.2445	29.8345	21.9157	20.2265	21.3501	23.1414	18.0698	25.0513	25.9758	12.7389	9.02644	8.36913	9.26159	8.67566	7.45205	9.88218	11.3206
ENSGALG00000009899	1	34804698..34809101	ENSGALG00000009899	1045	1252	1104	1240	1521	1056	922	1080	24.9309	28.7147	29.5956	30.1204	29.0866	30.2639	28.2717	25.7567	65.727	73.2026	73.5723	73.8997	76.8925	75.6917	72.5328	65.3081	46.546	50.0049	50.4892	53.1684	47.8104	51.7721	47.455	47.2057
DYRK2	1	34899306..34909399	ENSGALG00000009901	1017	982	774	854	1412	840	797	1112	12.3638	11.4768	10.5732	10.5707	13.7596	12.2673	12.4534	13.5139	32.5954	29.2578	26.2842	25.9351	36.3746	30.6812	31.95	34.2655	45.2988	39.2211	35.3973	36.6176	44.3842	41.1824	41.0213	48.6044
IFNG	1	complement(35053221..35057370)	ENSGALG00000009903	6	0	7	2	1	2	2	2	0.132432	0	0.173611	0.044946	0.0176923	0.0530289	0.0567378	0.0441283	0.34914	0	0.431584	0.110274	0.046771	0.132628	0.145564	0.111891	0.26725	0	0.320131	0.0857554	0.0314335	0.0980533	0.102939	0.0874179
IL26	1	complement(35081112..35087712)	ENSGALG00000037779	0	0	0	0	0	0	0	1	0	0	0	0	0	0	0	0.0569023	0	0	0	0	0	0	0	0.14428	0	0	0	0	0	0	0	0.043709
IL22	1	complement(35101235..35103693)	ENSGALG00000009904	6	5	3	4	1	0	2	0	0.196201	0.157181	0.110232	0.133177	0.0262116	0	0.0840583	0	0.517259	0.400703	0.274029	0.326747	0.0692922	0	0.215657	0	0.26725	0.1997	0.137199	0.171511	0.0314335	0	0.102939	0
MDM1	1	complement(35112854..35137000)	ENSGALG00000009905	227	321	340	289	424	222	283	272	1.89825	2.58055	3.1948	2.46062	2.84208	2.23008	3.04169	2.27375	5.00449	6.57861	7.94203	6.03707	7.51325	5.57757	7.80364	5.76527	10.1109	12.8207	15.5492	12.3917	13.3278	10.8839	14.5659	11.8888
RAP1B	1	35216064..35249134	ENSGALG00000009927	3241	3441	3503	3832	4873	2870	3103	3301	19.4735	19.876	23.6507	23.4428	23.4696	20.7151	23.9634	19.827	51.3395	50.6701	58.7937	57.5164	62.0435	51.8098	61.4795	50.2729	144.359	137.434	160.202	164.307	153.176	140.706	159.71	144.283
NUP107	1	35250853..35276198	ENSGALG00000009934	895	1130	975	1221	1496	972	769	902	8.55768	10.387	10.4755	11.8869	11.4659	11.1645	9.45061	8.62154	22.5612	26.4797	26.0413	29.1641	30.3109	27.9231	24.2461	21.8606	39.8647	45.1322	44.5896	52.3537	47.0246	47.6539	39.5802	39.4255
SLC35E3	1	35276896..35282437	ENSGALG00000009940	3945	4073	3592	3628	4727	3363	2543	3427	36.641	36.3675	37.4881	34.3088	35.1923	37.5221	30.3575	31.8185	96.5991	92.7119	93.1924	84.1758	93.0335	93.8448	77.8841	80.6782	175.717	162.676	164.273	155.56	148.586	164.877	130.887	149.791
ENSGALG00000045785	1	complement(35294096..35298219)	ENSGALG00000045785	0	0	0	0	0	0	0	1	0	0	0	0	0	0	0	0.0623737	0	0	0	0	0	0	0	0.158154	0	0	0	0	0	0	0	0.043709
MDM2	1	35298405..35309601	ENSGALG00000009942	879	860	717	618	956	636	592	773	15.9428	14.9953	14.6128	11.4126	13.8988	13.8571	13.8006	14.0153	42.0312	38.2275	36.3262	28.0005	36.7425	34.6575	35.4063	35.5368	39.1521	34.3484	32.7905	26.4984	30.0505	31.1809	30.47	33.787
CPM	1	complement(35315781..35347355)	ENSGALG00000009945	1265	1405	971	1303	1790	1268	1292	1448	21.1689	22.6028	18.2584	22.2008	24.0106	25.4898	27.7888	24.2226	55.8089	57.6215	45.389	54.4693	63.4737	63.7514	71.2938	61.4183	56.3451	56.1157	44.4067	55.8697	56.266	62.1658	66.4988	63.2906
CPSF6	1	35386197..35411271	ENSGALG00000019355	1308	1251	1089	1069	1646	1055	1061	1195	17.4887	16.08	16.3612	14.5528	17.6409	16.945	18.2333	15.9721	46.1067	40.9929	40.6726	35.7049	46.6351	42.3805	46.7786	40.4986	58.2604	49.9649	49.8032	45.8363	51.7396	51.7231	54.6093	52.2322
LYZ	1	35425914..35429601	ENSGALG00000009963	660	683	653	360	477	292	151	124	33.0015	32.8314	36.6893	18.3278	19.1183	17.5393	9.70435	6.19807	87.0041	83.6973	91.2068	44.9668	50.5407	43.8668	24.8971	15.7157	29.3975	27.279	29.8636	15.436	14.9938	14.3158	7.77192	5.41991
YEATS4	1	35427329..35432184	ENSGALG00000029135	301	419	379	422	469	328	274	280	6.57412	8.79759	9.30138	9.38429	8.21081	8.60567	7.69168	6.11328	17.3318	22.4278	23.1225	23.0242	21.7059	21.5233	19.7335	15.5007	13.407	16.7349	17.3328	18.0944	14.7423	16.0807	14.1027	12.2385
FRS2	1	35449509..35495133	ENSGALG00000009966	246	198	195	182	222	162	196	263	2.85174	2.20657	2.54007	2.14815	2.06286	2.25595	2.92032	3.04772	7.51823	5.62523	6.31442	5.27043	5.45332	5.64226	7.49226	7.72774	10.9572	7.90812	8.91792	7.80374	6.97825	7.94232	10.0881	11.4955
CCT2	1	35503971..35515953	ENSGALG00000009975	3285	3842	2872	3937	3707	2737	2811	3622	47.6534	53.579	46.8145	58.149	43.1046	47.6951	52.4106	52.5233	125.632	136.589	116.377	142.667	113.95	119.288	134.463	133.177	146.319	153.449	131.345	168.81	116.524	134.186	144.681	158.314
LRRC10	1	complement(35517139..35518821)	ENSGALG00000009976	0	2	0	0	0	0	0	0	0	0.0333601	0	0	0	0	0	0	0	0.0850451	0	0	0	0	0	0	0	0.07988	0	0	0	0	0	0
CTSEAL	1	35522127..35529831	ENSGALG00000010018	5	5	1	0	3	0	3	5	0.106886	0.102754	0.0240209	0	0.0514062	0	0.0824276	0.106848	0.281792	0.261953	0.059714	0	0.135896	0	0.211473	0.270922	0.222708	0.1997	0.0457329	0	0.0943006	0	0.154409	0.218545
BEST3	1	complement(35534379..35550868)	ENSGALG00000010029	1	0	0	0	0	0	0	0	0.014528	0	0	0	0	0	0	0	0.0383012	0	0	0	0	0	0	0	0.0445416	0	0	0	0	0	0	0
ENSGALG00000009959	1	35565047..35594362	ENSGALG00000009959	355	484	434	570	695	344	400	450	4.84641	6.35208	6.65761	7.92291	7.60534	5.64144	7.01862	6.14114	12.7769	16.1934	16.5503	19.4387	20.1053	14.1096	18.0067	15.5714	15.8123	19.331	19.8481	24.4403	21.8463	16.8652	20.5879	19.669
MYRFL	1	35597032..35639634	ENSGALG00000019352	3497	3534	2724	3352	4426	2477	2673	3481	37.9476	36.8667	33.2149	37.0349	38.4984	32.289	37.281	37.7605	100.044	93.9845	82.5696	90.8642	101.773	80.7566	95.6467	95.7448	155.762	141.148	124.577	143.726	139.125	121.439	137.578	152.151
CNOT2	1	35724872..35814526	ENSGALG00000010042	1121	1305	1205	1304	1571	1105	1079	1159	11.9426	13.3654	14.4251	14.1446	13.4157	14.1415	14.7746	12.343	31.4851	34.0726	35.8595	34.7033	35.4653	35.3687	37.9051	31.2968	49.9311	52.1217	55.1082	55.9125	49.3821	54.1744	55.5358	50.6587
KCNMB4	1	35820990..35831958	ENSGALG00000010044	41	31	39	36	57	47	41	52	1.10042	0.79986	1.17618	0.983771	1.22628	1.51534	1.41435	1.39515	2.90111	2.03909	2.9239	2.41366	3.24177	3.78996	3.62861	3.53752	1.82621	1.23814	1.78358	1.5436	1.79171	2.30425	2.11026	2.27287
PTPRB	1	complement(35846167..35891845)	ENSGALG00000010049	706	591	423	365	770	435	391	617	3.2253	2.59557	2.17142	1.69776	2.81967	2.38723	2.29584	2.81771	8.50309	6.6169	5.39797	4.16542	7.45401	5.97061	5.89013	7.14452	31.4464	23.6045	19.345	15.6504	24.2038	21.3266	20.1246	26.9684
ENSGALG00000040855	1	complement(35908165..35944608)	ENSGALG00000040855	2038	2038	1962	1714	2298	2115	1380	1700	20.0108	19.2373	21.647	17.1352	18.0865	24.9466	17.4157	16.6861	52.756	49.0418	53.8127	42.0409	47.8129	62.3929	44.681	42.309	90.7758	81.3977	89.728	73.4924	72.2343	103.691	71.0282	74.3052
ENSGALG00000010148	1	complement(35942364..36065234)	ENSGALG00000010148	714	636	637	490	617	674	488	565	8.44119	7.22839	8.46218	5.8982	5.847	9.57206	7.41524	6.67727	22.2541	18.4274	21.0363	14.4711	15.457	23.9403	19.0243	16.9308	31.8027	25.4018	29.1319	21.0101	19.3945	33.044	25.1172	24.6956
TSPAN8	1	complement(36146151..36163273)	ENSGALG00000010152	13993	15381	11580	15052	16536	11435	9655	13076	374.532	395.768	348.276	410.195	354.773	367.666	332.147	349.863	987.404	1008.94	865.786	1006.4	937.868	919.554	852.143	887.105	623.271	614.317	529.587	645.395	519.785	560.62	496.94	571.538
LGR5	1	36248569..36332580	ENSGALG00000010163	367	375	382	360	718	378	467	425	3.9256	3.85611	4.59135	3.92067	6.15611	4.85704	6.42032	4.54437	10.3493	9.83042	11.4137	9.61928	16.2741	12.1477	16.4717	11.5226	16.3468	14.9775	17.47	15.436	22.5693	18.5321	24.0363	18.5763
ZFC3H1	1	complement(36351342..36388496)	ENSGALG00000010177	2062	2534	2262	2295	3416	2139	2081	2569	9.70553	11.4661	11.9636	10.9985	12.8882	12.0943	12.5893	12.0876	25.5874	29.2306	29.7405	26.9844	34.0708	30.2486	32.2987	30.6491	91.8448	101.208	103.448	98.4044	107.377	104.868	107.108	112.288
TMEM19	1	36408413..36421447	ENSGALG00000041783	471	477	453	517	669	415	327	549	8.36607	8.14513	9.04141	9.34995	9.52509	8.855	7.46532	9.74806	22.056	20.7644	22.4762	22.9399	25.1803	22.1469	19.1527	24.717	20.9791	19.0514	20.717	22.1678	21.029	20.3461	16.8306	23.9962
RAB21	1	36448219..36460374	ENSGALG00000010183	1354	1645	1482	1586	2032	1421	1356	1546	17.9395	20.9525	22.0636	21.395	21.5803	22.6165	23.0914	20.476	47.295	53.4143	54.8483	52.4921	57.049	56.5651	59.2425	51.9186	60.3093	65.7013	67.7762	68.0041	63.873	69.6669	69.7929	67.574
TBC1D15	1	36471480..36498543	ENSGALG00000010190	1125	1339	1207	1588	1944	1298	1278	1462	10.2757	11.7576	12.3881	14.7682	14.2331	14.2421	15.0034	13.3491	27.0906	29.9738	30.7958	36.2335	37.6261	35.6203	38.4922	33.8477	50.1093	53.4797	55.1996	68.0898	61.1068	63.6366	65.7782	63.9025
TPH2	1	36509695..36563986	ENSGALG00000010198	0	1	0	5	0	0	0	1	0	0.0129307	0	0.0684748	0	0	0	0.0134458	0	0.0329643	0	0.168001	0	0	0	0.034093	0	0.03994	0	0.214389	0	0	0	0.043709
TRHDE	1	36640691..36854570	ENSGALG00000010200	50	57	107	40	93	31	68	64	0.55749	0.610971	1.34057	0.454093	0.831174	0.415211	0.974486	0.713332	1.46975	1.55755	3.33254	1.11411	2.19727	1.03847	2.50011	1.80871	2.22708	2.27658	4.89342	1.71511	2.92332	1.51983	3.49994	2.79737
KCNC2	1	complement(37630176..37725697)	ENSGALG00000010204	64	48	47	55	69	41	31	71	0.934909	0.674077	0.77148	0.818032	0.807943	0.719471	0.582038	1.0368	2.46477	1.71843	1.91784	2.00702	2.13586	1.79944	1.49325	2.62888	2.85066	1.91712	2.14945	2.35827	2.16891	2.01009	1.59556	3.10334
CAPS2	1	complement(37737256..37770744)	ENSGALG00000010208	29	24	15	35	19	36	31	30	0.287746	0.22893	0.16724	0.353589	0.151115	0.429096	0.395343	0.297563	0.758606	0.583612	0.415746	0.867522	0.399484	1.07319	1.01428	0.754494	1.29171	0.95856	0.685994	1.50072	0.597237	1.76496	1.59556	1.31127
ENSGALG00000021897	1	complement(37771966..37779099)	ENSGALG00000021897	237	305	386	389	581	399	301	337	5.18405	6.41357	9.48737	8.66341	10.1868	10.4842	8.46228	7.36879	13.6671	16.3502	23.5848	21.2555	26.9297	26.2215	21.7105	18.6842	10.5564	12.1817	17.6529	16.6794	18.2629	19.5616	15.4924	14.7299
ENSGALG00000010222	1	37779368..37787633	ENSGALG00000010222	0	0	0	0	0	0	0	0	0	0	0	0	0	0	0	0	0	0	0	0	0	0	0	0	0	0	0	0	0	0	0	0
ENSGALG00000010223	1	37790882..37796392	ENSGALG00000010223	4	3	7	8	11	0	11	3	0.150911	0.108808	0.296754	0.307305	0.332657	0	0.533401	0.113143	0.397858	0.277386	0.737707	0.753966	0.879403	0	1.36847	0.286883	0.178166	0.11982	0.320131	0.343022	0.345769	0	0.566166	0.131127
GLIPR1L	1	37799941..37807895	ENSGALG00000010224	387	360	359	292	397	251	240	194	7.03668	6.29272	7.3348	5.40577	5.78615	5.4824	5.60878	3.52617	18.5513	16.0421	18.2337	13.2629	15.2961	13.7118	14.3897	8.9409	17.2376	14.3784	16.4181	12.5203	12.4791	12.3057	12.3527	8.47954
KRR1	1	complement(37811564..37817029)	ENSGALG00000010227	495	823	650	679	868	527	519	530	8.8897	14.2089	13.1169	12.4157	12.4952	11.3693	11.9798	9.51487	23.4365	36.2229	32.6077	30.4615	33.032	28.4352	30.7349	24.1257	22.0481	32.8706	29.7264	29.114	27.2843	25.837	26.7128	23.1657
PHLDA1	1	complement(37937947..37938426)	ENSGALG00000034788	27	30	15	16	40	24	29	23	1.81249	1.93604	1.13147	1.09358	2.15236	1.93537	2.50214	1.54343	4.77841	4.93555	2.81274	2.68308	5.68993	4.84047	6.41939	3.91348	1.20262	1.1982	0.685994	0.686043	1.25734	1.17664	1.49262	1.00531
NAP1L1	1	complement(37945237..37973521)	ENSGALG00000010238	4752	5118	5031	5107	6726	5680	3954	5304	68.0552	70.4635	80.9612	74.4679	77.2119	97.7178	72.7816	75.9336	179.419	179.633	201.263	182.705	204.115	244.398	186.726	192.536	211.662	204.413	230.082	218.977	211.422	278.471	203.511	231.832
BBS10	1	complement(38032888..38034822)	ENSGALG00000033769	99	144	157	172	243	183	125	149	1.6529	2.31129	2.94544	2.92388	3.25208	3.67032	2.68239	2.48682	4.35767	5.89218	7.32212	7.17367	8.59711	9.17967	6.88185	6.30553	4.40962	5.75136	7.18007	7.37497	7.63835	8.97188	6.43371	6.51263
OSBPL8	1	complement(38034647..38089440)	ENSGALG00000010246	2722	3221	3383	3157	4933	2967	2766	2975	11.9474	13.5911	16.6849	14.1084	17.3555	15.6438	15.604	13.0532	31.4977	34.6479	41.4774	34.6146	45.8807	39.126	40.0331	33.0974	121.242	128.647	154.715	135.365	155.062	145.462	142.365	130.034
ZDHHC17	1	38168139..38234137	ENSGALG00000010253	628	723	669	637	891	649	600	674	3.32398	3.67889	3.9789	3.43287	3.78024	4.12652	4.08179	3.56619	8.76325	9.37862	9.89122	8.42246	9.99334	10.3207	10.4721	9.04236	27.9721	28.8766	30.5953	27.3131	28.0073	31.8183	30.8818	29.4598
CSRP2	1	complement(38237620..38245641)	ENSGALG00000029921	1187	1168	1304	961	1508	927	1050	1043	32.577	30.8164	40.2138	26.8536	33.1745	30.5619	37.0382	28.6148	85.8851	78.5606	99.9684	65.8847	87.6992	76.4371	95.0238	72.555	52.8709	46.6499	59.6357	41.2055	47.4018	45.4477	54.0432	45.5884
E2F7	1	complement(38293246..38308943)	ENSGALG00000031340	62	59	65	57	77	45	60	68	0.653132	0.597503	0.769413	0.611367	0.650193	0.569458	0.812382	0.716083	1.7219	1.52322	1.9127	1.49998	1.71883	1.42425	2.08422	1.81569	2.76158	2.35646	2.97264	2.44403	2.42038	2.2062	3.08818	2.97221
NAV3	1	38668218..38924294	ENSGALG00000010311	490	467	472	410	678	383	453	376	1.43359	1.31348	1.5517	1.22132	1.59001	1.34607	1.70344	1.09967	3.77947	3.34847	3.8574	2.99649	4.20331	3.36659	4.37028	2.78829	21.8254	18.652	21.5859	17.5799	21.3119	18.7772	23.3158	16.4346
SYT1	1	39230582..39452545	ENSGALG00000041094	19	37	35	26	43	25	20	20	0.216222	0.404787	0.44756	0.301257	0.392244	0.341764	0.292534	0.227521	0.57004	1.03193	1.1126	0.739127	1.03693	0.85477	0.750513	0.576897	0.84629	1.47778	1.60065	1.11482	1.35164	1.22567	1.02939	0.874179
PAWR	1	complement(39481007..39549218)	ENSGALG00000010320	509	510	415	437	627	444	417	508	14.6582	14.1193	13.4292	12.8134	14.4735	15.3599	15.4348	14.6242	38.6446	35.9945	33.3839	31.4374	38.2618	38.4159	39.5989	37.0809	22.6717	20.3694	18.9792	18.7376	19.7088	21.7678	21.4629	22.2041
PPP1R12A	1	complement(39561955..39685625)	ENSGALG00000010325	3268	4849	4805	4398	6095	3771	4114	3861	19.3688	27.6281	32	26.5395	28.9558	26.8483	31.3389	22.8752	51.0632	70.4325	79.5495	65.1141	76.5468	67.1491	80.402	58.0019	145.562	193.669	219.747	188.576	191.587	184.879	211.746	168.76
RPS16	1	39750306..39753558	ENSGALG00000026490	7317	8701	8995	8607	10817	7182	7124	8738	213.666	244.259	295.149	255.901	253.193	251.935	267.378	255.07	563.302	622.691	733.716	627.848	669.334	630.103	685.976	646.751	325.911	347.518	411.368	369.049	340.017	352.109	366.67	381.929
OTOGL	1	39761108..39852435	ENSGALG00000010342	13	18	21	20	18	6	17	17	0.0448084	0.0596442	0.0813342	0.0701883	0.0497315	0.0248432	0.0753122	0.0585748	0.118132	0.152051	0.20219	0.172205	0.131469	0.0621343	0.193218	0.148521	0.579041	0.71892	0.960392	0.857554	0.565804	0.29416	0.874985	0.743052
PTPRQ	1	39870775..39980929	ENSGALG00000010935	1	1	5	0	2	0	1	0	0.0035229	0.00338672	0.0197928	0	0.00564771	0	0.00452793	0	0.00928766	0.00863379	0.0492034	0	0.0149301	0	0.0116167	0	0.0445416	0.03994	0.228665	0	0.0628671	0	0.0514697	0
MYF6	1	39998073..39999566	ENSGALG00000010936	1	1	0	0	2	1	0	0	0.0251302	0.0241588	0	0	0.0402873	0.0301881	0	0	0.0662525	0.0615882	0	0	0.106503	0.0755022	0	0	0.0445416	0.03994	0	0	0.0628671	0.0490266	0	0
MYF5	1	40002758..40003972	ENSGALG00000028091	0	0	0	0	0	0	0	0	0	0	0	0	0	0	0	0	0	0	0	0	0	0	0	0	0	0	0	0	0	0	0	0
LIN7A	1	complement(40029520..40056169)	ENSGALG00000010939	18	11	13	16	15	11	17	10	0.834323	0.490155	0.677084	0.755092	0.557308	0.612484	1.01277	0.463348	2.19958	1.24956	1.68318	1.8526	1.47329	1.53186	2.59832	1.17486	0.801749	0.43934	0.594528	0.686043	0.471503	0.539293	0.874985	0.43709
ACSS3	1	40117328..40202440	ENSGALG00000010940	238	224	319	198	344	145	218	187	3.25675	2.94669	4.90496	2.75862	3.77319	2.3835	3.83411	2.55797	8.58601	7.51203	12.1934	6.7682	9.97471	5.96128	9.83665	6.48593	10.6009	8.94656	14.5888	8.48979	10.8131	7.10886	11.2204	8.17357
PPFIA2	1	complement(40204801..40505268)	ENSGALG00000010958	148	183	174	127	187	85	129	161	0.800925	0.952052	1.05808	0.699765	0.811175	0.552573	0.897264	0.870966	2.11154	2.42707	2.63029	1.71686	2.1444	1.38202	2.30199	2.20841	6.59216	7.30902	7.95753	5.44547	5.87807	4.16727	6.63959	7.03714
CCDC59	1	complement(40702586..40708882)	ENSGALG00000028648	231	375	330	401	385	254	264	272	4.85288	7.57352	7.79002	8.57729	6.48322	6.41005	7.12839	5.71218	12.794	19.3072	19.3654	21.0442	17.1389	16.0319	18.2883	14.4837	10.2891	14.9775	15.0919	17.194	12.1019	12.4528	13.588	11.8888
METTL25	1	40708974..40744319	ENSGALG00000042269	105	137	137	136	163	82	124	142	1.18247	1.4832	1.73363	1.5594	1.4714	1.10931	1.79482	1.59858	3.11742	3.78113	4.30968	3.82595	3.88975	2.77445	4.60473	4.05332	4.67687	5.47178	6.26541	5.83137	5.12367	4.02019	6.38224	6.20667
TMTC2	1	40829223..41086008	ENSGALG00000010975	313	314	234	300	491	239	267	291	3.26896	3.15264	2.74611	3.1901	4.11045	2.99849	3.58407	3.03811	8.61818	8.03704	6.82662	7.82684	10.8663	7.4994	9.19515	7.70337	13.9415	12.5412	10.7015	12.8633	15.4339	11.7174	13.7424	12.7193
SLC6A15	1	complement(41630549..41654661)	ENSGALG00000010992	3	7	4	3	9	3	12	7	0.0368393	0.0826357	0.0551935	0.0375085	0.0885881	0.0442539	0.189396	0.0859278	0.0971221	0.210664	0.137207	0.0920263	0.234189	0.110682	0.485908	0.217877	0.133625	0.27958	0.182932	0.128633	0.282902	0.14708	0.617636	0.305963
TSPAN19	1	complement(41728240..41737904)	ENSGALG00000027103	0	2	0	2	5	0	1	0	0	0.0664438	0	0.070371	0.138503	0	0.0444166	0	0	0.169386	0	0.172654	0.366142	0	0.113954	0	0	0.07988	0	0.0857554	0.157168	0	0.0514697	0
LRRIQ1	1	41740334..41838759	ENSGALG00000044478	1	2	0	0	3	2	2	0	0.00635779	0.012224	0	0	0.0152887	0.0152748	0.0163432	0	0.0167615	0.0311628	0	0	0.0404167	0.0382032	0.0419294	0	0.0445416	0.07988	0	0	0.0943006	0.0980533	0.102939	0
ALX1	1	41853035..41872458	ENSGALG00000027213	0	0	0	0	0	0	0	0	0	0	0	0	0	0	0	0	0	0	0	0	0	0	0	0	0	0	0	0	0	0	0	0
RASSF9	1	complement(42129042..42155671)	ENSGALG00000027633	47	55	59	62	86	67	70	58	1.03739	1.16704	1.46329	1.39333	1.52154	1.77647	1.98582	1.27972	2.73493	2.97513	3.63763	3.41849	4.0223	4.44305	5.09475	3.24484	2.09346	2.1967	2.69824	2.65842	2.70328	3.28479	3.60288	2.53512
NTS	1	42173476..42186023	ENSGALG00000027192	2136	3799	3682	3661	3295	1983	2685	2554	43.3454	74.1122	83.9581	75.6414	53.5969	48.3397	70.0303	51.8093	114.274	188.935	208.713	185.584	141.687	120.9	179.667	131.367	95.1409	151.732	168.389	156.975	103.574	97.2198	138.196	111.633
MGAT4C_1	1	complement(42216971..42324128)	ENSGALG00000028360	0	0	1	0	0	1	0	0	0	0	0.0174628	0	0	0.0186688	0	0	0	0	0.043411	0	0	0.0466916	0	0	0	0	0.0457329	0	0	0.0490266	0	0
C12orf50	1	complement(42783312..42794501)	ENSGALG00000045093	86	101	114	94	190	102	135	105	2.03675	2.29953	3.03376	2.26665	3.60691	2.90188	4.10935	2.48584	5.36963	5.86222	7.54169	5.56119	9.53513	7.25777	10.5428	6.30306	3.83058	4.03394	5.21355	4.03051	5.97237	5.00072	6.94841	4.58944
C12orf29	1	42795854..42802617	ENSGALG00000011168	265	307	291	324	416	272	258	278	4.38185	4.8801	5.40682	5.45475	5.51375	5.40282	5.48317	4.59517	11.5522	12.4409	13.4409	13.3831	14.576	13.5128	14.0674	11.6514	11.8035	12.2616	13.3083	13.8924	13.0764	13.3352	13.2792	12.1511
CEP290	1	complement(42803231..42852341)	ENSGALG00000011177	118	312	266	215	311	206	243	243	0.422274	1.07336	1.06962	0.783374	0.892103	0.885563	1.11768	0.869288	1.11327	2.73633	2.659	1.92199	2.35834	2.21484	2.86748	2.20415	5.25591	12.4613	12.165	9.21871	9.77583	10.0995	12.5071	10.6213
ENSGALG00000033106	1	42864751..42878912	ENSGALG00000033106	358	349	321	351	477	306	311	419	8.18002	7.66613	8.24164	8.16576	8.73639	8.39911	9.13339	9.57041	21.5656	19.5433	20.4881	20.0345	23.0953	21.0066	23.4323	24.2666	15.9459	13.9391	14.6803	15.0501	14.9938	15.0022	16.0071	18.3141
ENSGALG00000011198	1	42883502..42889250	ENSGALG00000011198	564	618	574	556	826	515	470	611	12.5914	13.2636	14.3994	12.6383	14.7814	13.8115	13.4863	13.6358	33.1956	33.813	35.7957	31.0077	39.0758	34.5434	34.5999	34.5747	25.1215	24.6829	26.2507	23.84	25.9641	25.2487	24.1907	26.7062
KITLG	1	complement(42981399..43032887)	ENSGALG00000011206	209	217	227	188	366	224	271	272	3.95277	3.94542	4.82412	3.62019	5.54854	5.08913	6.58756	5.14244	10.421	10.0581	11.9924	8.88205	14.668	12.7282	16.9008	13.0391	9.30919	8.66698	10.3814	8.06101	11.5047	10.982	13.9483	11.8888
DUSP6	1	complement(43288467..43292808)	ENSGALG00000011207	299	367	332	340	543	298	328	342	3.48411	4.11118	4.34707	4.03384	5.07182	4.17136	4.91242	3.98375	9.18541	10.4807	10.8065	9.89693	13.4077	10.4328	12.6031	10.1011	13.3179	14.658	15.1833	14.5784	17.0684	14.6099	16.8821	14.9485
POC1B	1	complement(43326703..43370334)	ENSGALG00000035493	504	563	557	552	723	418	475	502	4.29707	4.61455	5.33623	4.7918	4.94109	4.28113	5.20518	4.27849	11.3287	11.7639	13.2654	11.7566	13.0621	10.7073	13.3542	10.8485	22.449	22.4862	25.4732	23.6685	22.7264	20.4931	24.4481	21.9419
ATP2B1	1	complement(43392905..43455189)	ENSGALG00000030550	13485	12024	8490	11086	13696	9507	8099	13939	67.3934	57.7689	47.6773	56.4105	54.8659	57.0755	52.0233	69.6375	177.674	147.271	118.522	138.402	145.042	142.749	133.469	176.572	600.643	480.239	388.273	475.342	430.514	466.096	416.853	609.259
EPYC	1	complement(43925156..43947733)	ENSGALG00000011269	5	22	7	14	20	14	13	17	0.0843481	0.356785	0.132691	0.240465	0.270444	0.283709	0.28187	0.286681	0.222373	0.909556	0.329859	0.589975	0.714939	0.709573	0.723155	0.726903	0.222708	0.87868	0.320131	0.600288	0.628671	0.686373	0.669106	0.743052
KERA	1	complement(43969658..43979925)	ENSGALG00000011270	3	1	0	0	1	1	0	1	0.0304709	0.00976435	0	0	0.00814155	0.0122013	0	0.0101534	0.0803326	0.0248923	0	0	0.0215228	0.030516	0	0.0257447	0.133625	0.03994	0	0	0.0314335	0.0490266	0	0.043709
LUM	1	complement(43987396..43999595)	ENSGALG00000011271	2094	4295	3022	3276	4025	2313	3304	2315	26.9848	53.2089	43.7597	42.9838	41.5768	35.8062	54.7246	29.8221	71.1419	135.646	108.783	105.46	109.911	89.5533	140.399	75.6164	93.2701	171.542	138.205	140.467	126.52	113.399	170.056	101.186
DCN	1	complement(44019260..44058954)	ENSGALG00000011274	5576	8691	8453	7538	10045	5786	9207	5400	62.6738	93.91	106.761	86.2656	90.5014	78.1235	133.009	60.6739	165.231	239.406	265.399	211.651	239.247	195.391	341.243	153.844	248.364	347.119	386.58	323.212	315.75	283.668	473.881	236.028
ENSGALG00000038077	1	44357761..44365326	ENSGALG00000038077	0	0	0	0	0	0	0	0	0	0	0	0	0	0	0	0	0	0	0	0	0	0	0	0	0	0	0	0	0	0	0	0
BTG1	1	complement(44398383..44401046)	ENSGALG00000011276	9235	9882	8173	9816	16803	8792	8271	9573	162.748	167.419	161.845	176.13	237.361	186.126	187.343	168.645	429.065	426.801	402.333	432.13	627.481	465.512	480.641	427.613	411.342	394.687	373.775	420.888	528.178	431.042	425.706	418.426
PLEKHG7	1	44602930..44615820	ENSGALG00000011277	2	1	2	3	2	1	0	2	0.0651088	0.031296	0.0731606	0.0994373	0.0521894	0.0391066	0	0.0650856	0.171651	0.0797831	0.181871	0.243967	0.137967	0.0978078	0	0.16503	0.0890832	0.03994	0.0914659	0.128633	0.0628671	0.0490266	0	0.0874179
EEA1	1	complement(44624066..44689535)	ENSGALG00000011280	981	1577	1130	1391	1793	1362	1303	1670	6.58086	10.1701	8.51784	9.50078	9.64132	10.9757	11.2346	11.1989	17.3496	25.9267	21.1747	23.3099	25.4875	27.4508	28.8231	28.3957	43.6953	62.9854	51.6782	59.6429	56.3603	66.7743	67.065	72.994
ENSGALG00000011285	1	44817183..44837191	ENSGALG00000011285	788	805	539	810	941	782	648	852	24.5316	24.0921	18.855	25.6745	23.4818	29.2446	25.9283	26.5145	64.6743	61.4181	46.8719	62.9919	62.0759	73.1425	66.5207	67.2298	35.0988	32.1517	24.65	34.731	29.579	38.3388	33.3524	37.24
UBE2N	1	complement(44841386..44860420)	ENSGALG00000030515	2145	2362	2015	2341	3065	1812	1770	1954	14.8043	15.6718	15.6269	16.4505	16.9563	15.023	15.7012	13.4812	39.0295	39.9522	38.8471	40.3609	44.8253	37.5735	40.2824	34.1827	95.5417	94.3383	92.1519	100.377	96.3438	88.8363	91.1013	85.4073
MRPL42	1	44870332..44877527	ENSGALG00000011293	385	567	483	512	557	422	344	423	16.3171	23.1018	23.0021	22.0938	18.9226	21.485	18.7388	17.9213	43.018	58.8935	57.1814	54.2067	50.0233	53.7352	48.0755	45.4408	17.1485	22.646	22.089	21.9534	17.5085	20.6892	17.7056	18.4889
SOCS2	1	44892184..44894286	ENSGALG00000011295	138	88	147	89	115	92	133	89	2.69912	1.65464	3.2307	1.77236	1.80295	2.16158	3.34344	1.74011	7.11587	4.21819	8.03127	4.34843	4.76622	5.40622	8.57782	4.4122	6.14674	3.51472	6.72274	3.81612	3.61486	4.51045	6.84547	3.8901
CRADD	1	44903758..44979576	ENSGALG00000011297	372	371	357	381	470	321	334	336	3.72272	3.56919	4.01442	3.88204	3.77014	3.85889	4.29599	3.36126	9.81446	9.09897	9.97952	9.5245	9.96664	9.6513	11.0216	8.52273	16.5695	14.8177	16.3267	16.3364	14.7738	15.7376	17.1909	14.6862
PLXNC1	1	45063944..45130477	ENSGALG00000011309	630	338	633	273	871	272	339	262	4.11286	2.12129	4.64349	1.81461	4.55789	2.13311	2.84448	1.70982	10.843	5.40781	11.5433	4.45211	12.0491	5.33502	7.2977	4.33538	28.0612	13.4997	28.9489	11.7056	27.3786	13.3352	17.4482	11.4517
CEP83	1	complement(45134394..45152813)	ENSGALG00000019336	80	131	126	117	177	99	107	92	1.08454	1.70729	1.9194	1.61496	1.92341	1.61225	1.86441	1.24678	2.85926	4.3524	4.77146	3.96226	5.08468	4.03232	4.78325	3.16131	3.56333	5.23214	5.76235	5.01669	5.56374	4.85364	5.50726	4.02122
ENSGALG00000011320	1	complement(45165477..45169947)	ENSGALG00000011320	1042	1205	548	1033	1306	982	986	1144	21.2188	23.5895	12.5392	21.4176	21.3176	24.0218	25.8066	23.2876	55.9406	60.137	31.1715	52.5477	56.3547	60.0798	66.2083	59.0475	46.4123	48.1277	25.0616	44.2927	41.0522	48.1442	50.7491	50.003
SNAPC3	1	45242011..45243420	ENSGALG00000011323	340	354	288	272	452	284	264	287	7.04145	7.04799	6.70213	5.73549	7.5035	7.06548	7.02728	5.94169	18.5639	17.9675	16.661	14.0719	19.8361	17.6712	18.0289	15.0656	15.1441	14.1388	13.1711	11.6627	14.208	13.9236	13.588	12.5445
NDUFA12	1	complement(45308443..45315930)	ENSGALG00000011325	1102	1236	1135	1382	1489	1105	969	1234	56.2585	60.6602	65.1088	71.8344	60.9317	67.7655	63.5814	62.9748	148.318	154.641	161.855	176.244	161.077	169.485	163.122	159.678	49.0848	49.3658	51.9069	59.257	46.8045	54.1744	49.8741	53.9369
NR2C1	1	complement(45324344..45368430)	ENSGALG00000011327	519	564	537	536	765	520	460	454	7.44375	7.77647	8.65438	7.82722	8.79485	8.95918	8.47974	6.50917	19.6245	19.8246	21.5141	19.2039	23.2498	22.4074	21.7553	16.5045	23.1171	22.5262	24.5586	22.9825	24.0467	25.4939	23.6761	19.8439
FGD6	1	complement(45374215..45438791)	ENSGALG00000011342	242	174	201	192	285	163	138	206	1.64266	1.13543	1.53308	1.32694	1.55067	1.32911	1.20396	1.3978	4.33065	2.89456	3.81112	3.25562	4.09931	3.32417	3.08883	3.54423	10.7791	6.94956	9.19232	8.23252	8.95856	7.99134	7.10282	9.00404
VEZT	1	45439075..45485296	ENSGALG00000011357	482	513	458	504	738	528	479	487	5.49591	5.62327	5.86807	5.85115	6.74515	7.23214	7.01986	5.55094	14.4893	14.3355	14.5876	14.3557	17.8313	18.088	18.0099	14.0749	21.4691	20.4892	20.9457	21.6104	23.198	25.8861	24.654	21.2863
METAP2	1	45535393..45550173	ENSGALG00000011377	1899	2333	1875	2451	2959	1882	1919	2096	28.6728	33.8641	31.8115	37.6797	35.8124	34.1354	37.241	31.6361	75.5922	86.33	79.0809	92.4463	94.6727	85.3747	95.544	80.2158	84.5845	93.18	85.7492	105.093	93.0118	92.2682	98.7703	91.614
USP44	1	complement(45554763..45566132)	ENSGALG00000011400	868	975	787	1014	1421	722	758	979	11.8167	12.7602	12.0389	14.055	15.5064	11.8073	13.2631	13.323	31.1531	32.5298	29.9278	34.4837	40.9924	29.5308	34.0272	33.7816	38.6621	38.9415	35.9918	43.478	44.6671	35.3972	39.014	42.7911
NTN4	1	complement(45599391..45634244)	ENSGALG00000011406	80	122	102	145	179	55	96	82	1.23997	1.81786	1.77647	2.28827	2.22391	1.02406	1.91246	1.27052	3.26902	4.63428	4.41617	5.61422	5.87906	2.56123	4.90654	3.2215	3.56333	4.87268	4.66476	6.21727	5.6266	2.69647	4.94109	3.58413
SNRPF	1	45665312..45666829	ENSGALG00000011409	985	1067	998	1234	1224	894	809	900	47.4642	49.428	54.0378	60.5429	47.2774	51.7496	50.1047	43.3528	125.133	126.007	134.334	148.541	124.981	129.429	128.547	109.925	43.8735	42.616	45.6415	52.9111	38.4747	43.8298	41.639	39.3381
AMDHD1	1	45669441..45677498	ENSGALG00000011414	25	27	34	19	55	30	20	11	0.438458	0.45523	0.670045	0.339281	0.773202	0.632047	0.450835	0.192853	1.15594	1.16052	1.66568	0.832419	2.04402	1.58079	1.15665	0.488994	1.11354	1.07838	1.55492	0.814677	1.72884	1.4708	1.02939	0.480799
HAL	1	complement(45679241..45691863)	ENSGALG00000011421	82	78	44	5	17	43	5	20	1.06898	0.977525	0.644532	0.0663655	0.177642	0.673384	0.0837769	0.260633	2.81822	2.49201	1.60225	0.162826	0.46961	1.68417	0.214935	0.660856	3.65241	3.11532	2.01225	0.214389	0.53437	2.10815	0.257348	0.874179
LTA4H	1	complement(45694933..45718500)	ENSGALG00000033709	8447	8937	7057	5798	9834	5653	5557	9208	33.8034	34.3818	31.7333	23.6241	31.545	27.1755	28.5824	36.8357	89.1183	87.6498	78.8865	57.9611	83.3915	67.9674	73.3299	93.3998	376.243	356.944	322.737	248.605	309.117	277.148	286.017	402.472
ELK3	1	45759156..45793336	ENSGALG00000043701	550	578	555	507	875	467	459	537	5.43694	5.49286	6.16484	5.10291	6.93334	5.5456	5.83183	5.30654	14.3338	14.003	15.3253	12.5199	18.3288	13.8699	14.9619	13.4552	24.4979	23.0853	25.3818	21.739	27.5043	22.8954	23.6246	23.4717
CDK17	1	complement(45800053..45837648)	ENSGALG00000011456	442	379	330	345	560	339	375	338	9.29228	7.65982	7.79563	7.38478	9.43692	8.5613	10.1328	7.10333	24.4979	19.5272	19.3793	18.1184	24.9472	21.4123	25.9964	18.0111	19.6874	15.1373	15.0919	14.7928	17.6028	16.62	19.3011	14.7736
ENSGALG00000011459	1	45924074..45955569	ENSGALG00000011459	1	1	2	1	4	0	1	0	0.0129267	0.012427	0.0290505	0.0131615	0.0414466	0	0.0166145	0	0.0340794	0.0316802	0.0722172	0.0322914	0.109567	0	0.0426254	0	0.0445416	0.03994	0.0914659	0.0428777	0.125734	0	0.0514697	0
ENSGALG00000030853	1	45981253..46014031	ENSGALG00000030853	8	8	12	20	20	5	17	7	0.0648378	0.0623314	0.109284	0.165039	0.12993	0.0486797	0.177087	0.0567128	0.170936	0.158902	0.271671	0.404919	0.34348	0.121751	0.454328	0.1438	0.356333	0.31952	0.548795	0.857554	0.628671	0.245133	0.874985	0.305963
NEDD1	1	46033709..46057310	ENSGALG00000031699	661	775	736	776	972	610	629	658	4.33365	4.88464	5.4221	5.18003	5.10812	4.80421	5.30033	4.31244	11.4251	12.4525	13.4789	12.7091	13.5037	12.0156	13.5983	10.9345	29.442	30.9535	33.6594	33.2731	30.5534	29.9063	32.3744	28.7605
TMPO	1	46669671..46691839	ENSGALG00000011504	1686	2289	2067	2177	2801	1612	1648	1675	16.3512	21.3411	22.5252	21.4965	21.7744	18.78	20.5423	16.2387	43.1078	54.405	55.9959	52.7412	57.5623	46.97	52.7025	41.1746	75.0971	91.4227	94.53	93.3448	88.0453	79.031	84.822	73.2125
SLC25A3	1	46695844..46704277	ENSGALG00000011514	11737	12346	11336	12658	14120	9170	8642	11208	185.162	187.241	200.952	203.32	178.555	173.782	175.231	176.754	488.157	477.335	499.551	498.84	472.024	434.639	449.565	448.174	522.785	493.099	518.428	542.746	443.842	449.574	444.801	489.89
IKBIP	1	complement(46712027..46717483)	ENSGALG00000026284	89	97	134	127	134	107	122	75	2.45181	2.5689	4.148	3.5622	2.95899	3.54095	4.31973	2.06539	6.46387	6.54892	10.3116	8.73978	7.82231	8.85613	11.0825	5.23697	3.9642	3.87418	6.12821	5.44547	4.21209	5.24585	6.2793	3.27817
APAF1	1	46718811..46744193	ENSGALG00000011531	1252	1204	1117	1142	1500	994	1120	1418	9.66685	8.93689	9.69106	8.9777	9.28356	9.2195	11.1147	10.9447	25.4854	22.7829	24.0912	22.0266	24.5418	23.0585	28.5155	27.7511	55.7661	48.0878	51.0837	48.9664	47.1503	48.7325	57.646	61.9793
ANKS1B	1	complement(46756368..47168639)	ENSGALG00000011549	45	48	60	59	71	38	69	46	0.22929	0.235121	0.343527	0.306085	0.289983	0.232592	0.451878	0.234301	0.604492	0.599397	0.85398	0.750973	0.766592	0.581727	1.15932	0.59409	2.00437	1.91712	2.74398	2.52979	2.23178	1.86301	3.55141	2.01061
ACTR6	1	47183349..47267032	ENSGALG00000040976	1275	1516	1241	1401	1501	1079	1061	1318	15.7096	17.9569	17.1816	17.5756	14.8244	15.9704	16.8023	16.2336	41.4162	45.7778	42.712	43.1214	39.1894	39.9429	43.1074	41.1616	56.7905	60.549	56.7546	60.0717	47.1817	52.8998	54.6093	57.6084
UHRF1BP1L	1	complement(47186191..47253542)	ENSGALG00000011557	1006	902	1064	1038	1308	764	913	945	4.83246	4.16539	5.74314	5.07675	5.0364	4.40863	5.63691	4.53782	12.7401	10.6189	14.277	12.4557	13.3141	11.0262	14.4618	11.506	44.8089	36.0259	48.6598	44.5071	41.1151	37.4564	46.9918	41.305
SCYL2	1	47268108..47299064	ENSGALG00000011569	1302	1275	1087	1104	1367	970	1113	1282	8.93329	8.40988	8.38045	7.71237	7.51816	7.99489	9.81513	8.79294	23.5515	21.4394	20.8331	18.9221	19.8748	19.9957	25.1813	22.2952	57.9932	50.9235	49.7117	47.337	42.9696	47.5558	57.2858	56.0349
SLC17A8	1	47308619..47334316	ENSGALG00000041122	0	0	1	0	0	0	1	0	0	0	0.0176033	0	0	0	0.0201352	0	0	0	0.0437604	0	0	0	0.0516582	0	0	0	0.0457329	0	0	0	0.0514697	0
NR1H4	1	47358279..47391069	ENSGALG00000011594	1106	1328	1757	1137	1745	1383	1199	1186	17.6004	20.3162	31.4178	18.4223	22.2589	26.438	24.5237	18.8667	46.401	51.7923	78.1021	45.1988	58.8431	66.1229	62.917	47.8381	49.263	53.0403	80.3528	48.752	54.8515	67.8039	61.7121	51.8388
GAS2L3	1	47393195..47407557	ENSGALG00000028373	126	130	126	97	170	112	98	120	1.2749	1.26453	1.43256	0.9993	1.37879	1.36133	1.27448	1.21376	3.36111	3.22367	3.56124	2.45176	3.64493	3.40477	3.26975	3.07758	5.61224	5.1922	5.76235	4.15914	5.3437	5.49098	5.04403	5.24507
ANO4	1	47513533..47631233	ENSGALG00000011614	3	1	10	7	7	9	1	2	0.0303233	0.00971704	0.113577	0.0720396	0.0567146	0.109279	0.0129914	0.0202083	0.0799433	0.0247717	0.282344	0.176747	0.149929	0.273313	0.0333302	0.0512398	0.133625	0.03994	0.457329	0.300144	0.220035	0.44124	0.0514697	0.0874179
SLC5A8	1	complement(47637919..47660352)	ENSGALG00000011633	14	7	1	3	27	20	9	16	0.224133	0.107734	0.0179893	0.0489009	0.346484	0.384634	0.185191	0.256061	0.590897	0.274648	0.04472	0.119977	0.915957	0.961991	0.475119	0.649262	0.623582	0.27958	0.0457329	0.128633	0.848706	0.980533	0.463227	0.699343
UTP20	1	47672512..47732097	ENSGALG00000011643	1132	1254	911	1154	1514	921	903	989	3.93241	4.18783	3.55606	4.08166	4.21581	3.84337	4.03182	3.43443	10.3673	10.6761	8.84007	10.0143	11.1448	9.6125	10.3439	8.70827	50.4211	50.0848	41.6627	49.4809	47.5904	45.1535	46.4771	43.2282
ARL1	1	complement(47732183..47737782)	ENSGALG00000011651	2355	2782	2382	2609	3351	2095	2143	2516	43.4422	49.3353	49.3742	49.002	49.5494	46.4243	50.8093	46.3956	114.53	125.771	122.74	120.225	130.987	116.11	130.355	117.64	104.895	111.113	108.936	111.868	105.334	102.711	110.3	109.972
ENSGALG00000011662	1	complement(47737682..47784522)	ENSGALG00000011662	1542	1749	1474	1887	2725	1436	1438	1638	5.69836	6.21347	6.12069	7.09995	8.07187	6.3747	6.83005	6.05096	15.023	15.84	15.2155	17.4196	21.3386	15.9435	17.5229	15.3427	68.6831	69.8551	67.4103	80.9103	85.6564	70.4023	74.0134	71.5953
CNOT4	1	47800013..47869940	ENSGALG00000011682	484	509	429	437	642	373	428	503	5.6875	5.75006	5.66462	5.22848	6.04719	5.26532	6.46427	5.90866	14.9943	14.6587	14.0818	12.828	15.9862	13.1689	16.5845	14.9819	21.5581	20.3295	19.6194	18.7376	20.1803	18.2869	22.029	21.9856
ENSGALG00000011717	1	47884753..47909098	ENSGALG00000011717	2988	2828	2416	2403	4806	2531	1755	2587	41.4703	37.7324	37.6783	33.9569	53.4666	42.1977	31.3064	35.892	109.331	96.1916	93.6651	83.3126	141.343	105.539	80.3186	91.0072	133.09	112.95	110.491	103.035	151.07	124.086	90.3293	113.075
STRA8	1	complement(47914186..47925075)	ENSGALG00000011722	7	9	5	1	24	18	6	17	0.258092	0.319006	0.20715	0.0375401	0.709301	0.797241	0.284334	0.626572	0.680427	0.813244	0.514958	0.0921038	1.87509	1.99395	0.729476	1.58872	0.311791	0.35946	0.228665	0.0428777	0.754405	0.88248	0.308818	0.743052
WDR91	1	47929076..47944077	ENSGALG00000011724	1032	1107	842	1062	1576	941	853	1074	10.0721	10.3865	9.23401	10.5532	12.3293	11.0324	10.7001	10.4783	26.5538	26.4783	22.955	25.892	32.5935	27.5927	27.4519	26.5685	45.9669	44.2136	38.5071	45.5361	49.5393	46.1341	43.9036	46.9434
AGBL3	1	complement(47965222..47968879)	ENSGALG00000011727	2	1	0	0	0	0	1	0	0.0483065	0.0232196	0	0	0	0	0.0310439	0	0.127354	0.0591939	0	0	0	0	0.079645	0	0.0890832	0.03994	0	0	0	0	0.0514697	0
PDE6H	1	complement(47994367..48000190)	ENSGALG00000025735	1	2	0	0	0	1	1	2	0.0555158	0.10674	0	0	0	0.0666894	0.0713537	0.110992	0.14636	0.272112	0	0	0	0.166794	0.183062	0.281429	0.0445416	0.07988	0	0	0	0.0490266	0.0514697	0.0874179
ARHGDIB	1	48011198..48019515	ENSGALG00000011738	1555	1391	1629	1266	2037	1252	1250	1223	29.4475	25.3235	34.6638	24.4101	30.9208	28.4815	30.4248	23.1521	77.6345	64.5574	86.1715	59.8897	81.7415	71.2338	78.0568	58.7039	69.2622	55.5565	74.4989	54.2832	64.0301	61.3814	64.3371	53.4561
ENSGALG00000011739	1	48020010..48038612	ENSGALG00000011739	0	0	0	0	0	0	0	0	0	0	0	0	0	0	0	0	0	0	0	0	0	0	0	0	0	0	0	0	0	0	0	0
MGP	1	48052894..48058138	ENSGALG00000011740	8073	9304	8034	9016	6336	8234	5908	7720	344.149	381.294	384.841	391.331	216.506	421.66	323.707	328.984	907.304	972.037	956.683	960.121	572.349	1054.6	830.491	834.164	359.584	371.602	367.418	386.585	199.163	403.685	304.083	337.433
OC3	1	48061738..48067659	ENSGALG00000028560	667	780	686	582	775	515	1134	531	20.0797	22.5738	23.2056	17.8391	18.7014	18.6242	43.8777	15.9798	52.9374	57.5475	57.6872	43.7677	49.4386	46.5802	112.571	40.518	29.7092	31.1532	31.3728	24.9548	24.361	25.2487	58.3666	23.2095
ART4	1	48069970..48074563	ENSGALG00000011742	2	3	4	3	29	2	21	2	0.019744	0.0284711	0.0443712	0.0301539	0.22948	0.0237178	0.266455	0.0197369	0.0520524	0.0725816	0.110303	0.0739819	0.606647	0.0593195	0.683606	0.0500445	0.0890832	0.11982	0.182932	0.128633	0.911573	0.0980533	1.08086	0.0874179
SMCO3	1	48076790..48077467	ENSGALG00000011743	0	0	0	0	0	1	0	0	0	0	0	0	0	0.0517384	0	0	0	0	0	0	0	0.129401	0	0	0	0	0	0	0	0.0490266	0	0
ENSGALG00000011745	1	48081434..48091448	ENSGALG00000011745	1731	1830	1568	1672	2463	1435	1370	1822	12.1188	12.3166	12.3352	11.9184	13.8219	12.0685	12.3277	12.7513	31.9496	31.3989	30.6643	29.2414	36.5393	30.1841	31.6275	32.332	77.1015	73.0902	71.7092	71.6915	77.4208	70.3532	70.5135	79.6377
ENSGALG00000039794	1	complement(48091388..48092200)	ENSGALG00000039794	0	0	0	0	0	0	0	0	0	0	0	0	0	0	0	0	0	0	0	0	0	0	0	0	0	0	0	0	0	0	0	0
ENSGALG00000011747	1	48093690..48094445	ENSGALG00000011747	106	149	105	118	102	71	55	70	4.09436	5.53281	4.55729	4.64067	3.15808	3.29442	2.73051	2.70286	10.7943	14.1048	11.3291	11.3858	8.34862	8.23953	7.00529	6.85332	4.72141	5.95106	4.80196	5.05957	3.20622	3.48089	2.83083	3.05963
HIST1H2B7	1	complement(48095494..48095874)	ENSGALG00000039722	10	100	80	121	122	57	77	13	0.766438	7.36811	6.88977	9.44237	7.49514	5.24798	7.58522	0.996015	2.02062	18.7836	17.1274	23.1666	19.8139	13.1255	19.4604	2.52548	0.445416	3.994	3.65863	5.1882	3.83489	2.79452	3.96317	0.568216
ENSGALG00000033191	1	complement(48099109..48099504)	ENSGALG00000033191	1	0	0	0	0	0	0	3	0.0737407	0	0	0	0	0	0	0.221143	0.194408	0	0	0	0	0	0	0.560726	0.0445416	0	0	0	0	0	0	0.131127
ENSGALG00000032272	1	48099163..48099621	ENSGALG00000032272	459	589	415	630	656	608	631	619	29.2013	36.0233	29.6671	40.8083	33.4531	46.4658	51.5964	39.3664	76.9854	91.8346	73.75	100.122	88.4356	116.214	132.374	99.8166	20.4446	23.5247	18.9792	27.013	20.6204	29.8082	32.4774	27.0558
ENSGALG00000043062	1	complement(48100497..48100907)	ENSGALG00000043062	427	401	408	387	582	385	384	398	30.3381	27.3895	32.573	27.9956	33.1456	32.8595	35.0664	28.2676	79.9824	69.8242	80.9739	68.6866	87.6228	82.1835	89.9652	71.6747	19.0193	16.0159	18.659	16.5937	18.2943	18.8753	19.7644	17.3962
ENSGALG00000040303	1	48101741..48102151	ENSGALG00000040303	0	0	0	0	0	0	0	0	0	0	0	0	0	0	0	0	0	0	0	0	0	0	0	0	0	0	0	0	0	0	0	0
HIST1H46L2	1	complement(48102824..48103259)	ENSGALG00000035445	0	0	0	3	3	4	0	1	0	0	0	0.204576	0.161057	0.321822	0	0.0669516	0	0	0	0.501923	0.425766	0.804895	0	0.169761	0	0	0	0.128633	0.0943006	0.196107	0	0.043709
ENSGALG00000036483	1	48102939..48103334	ENSGALG00000036483	122	106	97	154	33	39	17	186	8.99636	7.51436	8.03741	11.5624	1.95058	3.45471	1.61122	13.7109	23.7177	19.1564	19.9804	28.368	5.1565	8.64043	4.1337	34.765	5.43408	4.23364	4.43609	6.60317	1.03731	1.91204	0.874985	8.12987
ENSGALG00000030658	1	48110522..48111180	ENSGALG00000030658	0	0	0	0	0	0	0	0	0	0	0	0	0	0	0	0	0	0	0	0	0	0	0	0	0	0	0	0	0	0	0	0
H2A-VII_1	1	complement(48110553..48110996)	ENSGALG00000031571	3	10	5	2	2	0	0	2	0.197306	0.632264	0.36951	0.133927	0.105437	0	0	0.131491	0.520172	1.61184	0.918573	0.328586	0.27873	0	0	0.333405	0.133625	0.3994	0.228665	0.0857554	0.0628671	0	0	0.0874179
HIST1H2B8	1	48111297..48111790	ENSGALG00000030567	87	124	114	140	143	71	98	94	5.14274	7.04654	7.57212	8.426	6.77569	5.04166	7.44563	5.55454	13.5582	17.9638	18.8237	20.673	17.912	12.6095	19.1022	14.084	3.87512	4.95256	5.21355	6.00288	4.495	3.48089	5.04403	4.10864
HIST2H3L	1	48112892..48113390	ENSGALG00000038969	151	210	200	194	284	173	165	199	8.83647	11.8141	13.1513	11.559	13.3218	12.1615	12.4104	11.6413	23.2962	30.1177	32.6931	28.3598	35.2171	30.4167	31.8397	29.5174	6.72578	8.3874	9.14659	8.31828	8.92713	8.48161	8.4925	8.69808
ENSGALG00000038516	1	complement(48119159..48119554)	ENSGALG00000038516	0	12	0	0	0	0	0	0	0	0.850682	0	0	0	0	0	0	0	2.16865	0	0	0	0	0	0	0	0.47928	0	0	0	0	0	0
HIST2H4B_1	1	48119243..48119554	ENSGALG00000032198	0	0	0	0	0	0	0	8	0	0	0	0	0	0	0	0.748485	0	0	0	0	0	0	0	1.89784	0	0	0	0	0	0	0	0.349672
ENSGALG00000036908	1	complement(48119794..48120174)	ENSGALG00000036908	0	2	5	0	6	3	4	0	0	0.147362	0.430611	0	0.368613	0.27621	0.394037	0	0	0.375672	1.07046	0	0.974456	0.690816	1.01093	0	0	0.07988	0.228665	0	0.188601	0.14708	0.205879	0
HIST1H46	1	complement(48120560..48121074)	ENSGALG00000037322	577	807	617	907	600	708	454	770	32.7168	43.9894	39.3113	52.3625	27.2702	48.2246	33.0865	43.6446	86.2536	112.142	97.7248	128.47	72.0908	120.612	84.8855	110.665	25.7005	32.2316	28.2172	38.8901	18.8601	34.7109	23.3672	33.6559
ENSGALG00000043525	1	48120731..48121126	ENSGALG00000043525	0	6	0	0	0	0	0	0	0	0.425341	0	0	0	0	0	0	0	1.08433	0	0	0	0	0	0	0	0.23964	0	0	0	0	0	0
H2AFJ	1	complement(48125079..48125942)	ENSGALG00000038343	73	90	89	124	109	88	60	117	2.46724	2.92422	3.37999	4.26706	2.95296	3.57282	2.60639	3.95293	6.50456	7.45474	8.40239	10.4691	7.80637	8.93583	6.68686	10.023	3.25154	3.5946	4.07023	5.31684	3.42626	4.31435	3.08818	5.11395
ENSGALG00000037934	1	48126213..48126593	ENSGALG00000037934	15	3	3	13	9	0	67	19	1.14966	0.221043	0.258366	1.01447	0.55292	0	6.60012	1.45571	3.03092	0.563508	0.642278	2.48898	1.46168	0	16.933	3.69108	0.668124	0.11982	0.137199	0.55741	0.282902	0	3.44847	0.83047
HIST1H110	1	complement(48127672..48128582)	ENSGALG00000031159	173	205	171	139	199	152	180	173	5.54536	6.31709	6.1591	4.53646	5.11304	5.85285	7.41577	5.54339	14.6196	16.1042	15.311	11.1301	13.5167	14.6383	19.0256	14.0557	7.7057	8.1877	7.82033	5.96	6.25527	7.45205	9.26454	7.56165
ENSGALG00000034321	1	complement(48140149..48140520)	ENSGALG00000034321	29	17	29	110	259	44	160	51	2.27645	1.28288	2.55797	8.79165	16.2968	4.14908	16.1428	4.00198	6.00155	3.27047	6.3589	21.5701	43.0817	10.3771	41.4154	10.1473	1.29171	0.67898	1.32625	4.71655	8.14129	2.15717	8.23515	2.22916
HIST1H4I	1	48140209..48140520	ENSGALG00000041398	0	0	0	0	0	0	0	0	0	0	0	0	0	0	0	0	0	0	0	0	0	0	0	0	0	0	0	0	0	0	0	0
ENSGALG00000035244	1	48141763..48142963	ENSGALG00000035244	21	17	24	27	30	20	17	20	0.510597	0.397363	0.655704	0.668408	0.584686	0.584157	0.531261	0.48611	1.34612	1.013	1.63003	1.63992	1.54566	1.46101	1.36298	1.23257	0.935374	0.67898	1.09759	1.1577	0.943006	0.980533	0.874985	0.874179
ENSGALG00000037930	1	complement(48145393..48145803)	ENSGALG00000037930	1	0	1	0	0	3	0	0	0.0710494	0	0.0798358	0	0	0.256048	0	0	0.187313	0	0.198465	0	0	0.640391	0	0	0.0445416	0	0.0457329	0	0	0.14708	0	0
HIST2H4B_2	1	complement(48146441..48147882)	ENSGALG00000032933	165	182	177	264	204	161	120	203	3.34134	3.54313	4.02761	5.44326	3.31138	3.91654	3.12333	4.1094	8.80901	9.03254	10.0123	13.3549	8.75389	9.7955	8.01311	10.4197	7.34936	7.26908	8.09473	11.3197	6.41244	7.89329	6.17636	8.87292
ENSGALG00000042650	1	48147541..48147930	ENSGALG00000042650	0	0	2	0	8	0	64	0	0	0	0.168269	0	0.480142	0	6.15911	0	0	0	0.418304	0	1.26929	0	15.8016	0	0	0	0.0914659	0	0.251468	0	3.29406	0
HIST1H103	1	complement(48153696..48154408)	ENSGALG00000037167	8	15	5	1	5	2	5	1	0.327644	0.590586	0.230102	0.0416995	0.164144	0.0983972	0.263198	0.040941	0.863792	1.50559	0.572015	0.102309	0.433927	0.246097	0.675251	0.103809	0.356333	0.5991	0.228665	0.0428777	0.157168	0.0980533	0.257348	0.043709
HIST4H4	1	48160103..48160539	ENSGALG00000042491	198	287	144	251	72	190	50	314	13.2308	18.4366	10.8124	17.0771	3.85652	15.2516	4.29429	20.9747	34.8813	47.0007	26.8787	41.8982	10.195	38.145	11.0173	53.183	8.81924	11.4628	6.58554	10.7623	2.26321	9.31506	2.57348	13.7246
ENSGALG00000039351	1	48161388..48162158	ENSGALG00000039351	84	45	61	66	13	50	27	76	3.18147	1.63847	2.59606	2.54513	0.39467	2.27488	1.31435	2.87744	8.38752	4.17697	6.4536	6.24442	1.04334	5.6896	3.37205	7.29599	3.74149	1.7973	2.78971	2.82993	0.408636	2.45133	1.38968	3.32188
H2A-VII_2	1	complement(48161484..48161873)	ENSGALG00000029941	0	0	0	12	0	0	0	0	0	0	0	0.914823	0	0	0	0	0	0	0	2.2445	0	0	0	0	0	0	0	0.514533	0	0	0	0
HIST2H3C	1	complement(48162556..48163154)	ENSGALG00000030424	4	9	5	9	4	2	6	4	0.195	0.421791	0.273894	0.446721	0.156307	0.117124	0.375947	0.194931	0.514093	1.07527	0.680879	1.09602	0.413209	0.292934	0.964516	0.494263	0.178166	0.35946	0.228665	0.385899	0.125734	0.0980533	0.308818	0.174836
ENSGALG00000046198	1	complement(48163227..48163920)	ENSGALG00000046198	0	0	0	2	0	0	0	0	0	0	0	0.0856823	0	0	0	0	0	0	0	0.21022	0	0	0	0	0	0	0	0.0857554	0	0	0	0
H2A-VII_3	1	48164309..48164698	ENSGALG00000035715	0	0	0	0	0	0	3	0	0	0	0	0	0	0	0.288708	0	0	0	0	0	0	0	0.740699	0	0	0	0	0	0	0	0.154409	0
HIST1H4B	1	complement(48165722..48166033)	ENSGALG00000025786	0	0	0	0	0	0	17	0	0	0	0	0	0	0	2.04502	0	0	0	0	0	0	0	5.24662	0	0	0	0	0	0	0	0.874985	0
HIST1H101	1	48175690..48176349	ENSGALG00000031874	665	1023	652	712	1073	702	662	804	29.4225	43.5124	32.4148	32.0743	38.054	37.3109	37.6458	35.5598	77.5687	110.926	80.5806	78.6935	100.599	93.3167	96.5826	90.1648	29.6202	40.8586	29.8179	30.5289	33.7282	34.4167	34.0729	35.142
ENSGALG00000040174	1	48176561..48177760	ENSGALG00000040174	89	152	87	97	85	125	93	96	5.38078	8.83441	5.91033	5.97097	4.11923	9.07832	7.22667	5.80192	14.1857	22.5216	14.6926	14.6496	10.8895	22.7054	18.5405	14.7112	3.9642	6.07088	3.97876	4.15914	2.67185	6.12833	4.78668	4.19606
H2A-VII_4	1	complement(48177359..48177748)	ENSGALG00000028372	9	15	23	57	17	0	8	57	0.673876	1.07971	1.9351	4.34541	1.0203	0	0.769888	4.26636	1.77659	2.75252	4.8105	10.6614	2.69725	0	1.9752	10.8177	0.400874	0.5991	1.05186	2.44403	0.53437	0	0.411757	2.49141
ENSGALG00000027571	1	48178033..48179113	ENSGALG00000027571	314	344	206	262	214	275	185	208	8.48216	8.93334	6.2529	7.20603	4.63375	8.92379	6.42315	5.61675	22.3621	22.7738	15.5442	17.6798	12.2497	22.3189	16.479	14.2417	13.9861	13.7394	9.42098	11.234	6.72678	13.4823	9.52189	9.09146
H2A-VII_5	1	complement(48183617..48184006)	ENSGALG00000027113	0	0	0	0	0	0	0	0	0	0	0	0	0	0	0	0	0	0	0	0	0	0	0	0	0	0	0	0	0	0	0	0
ENSGALG00000042263	1	48184357..48184737	ENSGALG00000042263	15	23	15	36	5	16	15	26	1.14966	1.69467	1.29183	2.8093	0.307178	1.47312	1.47764	1.99203	3.03092	4.32023	3.21139	6.89255	0.812047	3.68435	3.79098	5.05095	0.668124	0.91862	0.685994	1.5436	0.157168	0.784426	0.772045	1.13643
ENSGALG00000033587	1	48193459..48195214	ENSGALG00000033587	4	6	2	0	11	1	0	0	0.226367	0.326425	0.12718	0	0.498985	0.0679818	0	0	0.596786	0.832157	0.31616	0	1.3191	0.170026	0	0	0.178166	0.23964	0.0914659	0	0.345769	0.0490266	0	0
H2A-VII_6	1	complement(48193601..48194213)	ENSGALG00000032645	103	70	59	38	74	44	30	77	4.90658	3.20567	3.15814	1.84308	2.82563	2.51788	1.83681	3.66672	12.9356	8.17224	7.85088	4.52195	7.46977	6.29736	4.71244	9.29726	4.58778	2.7958	2.69824	1.62935	2.32608	2.15717	1.54409	3.36559
HIST1H3H	1	48196308..48197130	ENSGALG00000027064	12	24	23	19	27	16	25	31	0.425778	0.81864	0.916996	0.686395	0.767907	0.681966	1.1401	1.09954	1.12251	2.08696	2.27958	1.68406	2.03002	1.70564	2.92499	2.78796	0.534499	0.95856	1.05186	0.814677	0.848706	0.784426	1.28674	1.35498
ENSGALG00000040004	1	complement(48197196..48197722)	ENSGALG00000040004	157	194	289	186	266	236	157	272	8.69944	10.3341	17.994	10.4936	11.8145	15.7088	11.1813	15.0663	22.9349	26.3448	44.7316	25.7457	31.2325	39.2887	28.6863	38.2017	6.99303	7.74836	13.2168	7.97526	8.36132	11.5703	8.08074	11.8888
HIST1H2B5	1	complement(48199091..48199471)	ENSGALG00000027594	222	266	143	235	182	144	124	234	17.0149	19.5992	12.3155	18.3385	11.1813	13.2581	12.2152	17.9283	44.8577	49.9644	30.6153	44.9931	29.5585	33.1592	31.3387	45.4586	9.88824	10.624	6.53981	10.0763	5.7209	7.05984	6.38224	10.2279
H2A-VII_7	1	48199800..48200189	ENSGALG00000027315	0	4	0	0	0	3	0	0	0	0.287923	0	0	0	0.269836	0	0	0	0.734005	0	0	0	0.674874	0	0	0	0.15976	0	0	0	0.14708	0	0
HIST1H111R	1	complement(48200667..48201409)	ENSGALG00000011783	3	3	1	4	5	2	2	4	0.117906	0.113348	0.0441622	0.160063	0.157516	0.0944243	0.101028	0.157152	0.310843	0.288959	0.109784	0.392712	0.416406	0.23616	0.259195	0.39847	0.133625	0.11982	0.0457329	0.171511	0.157168	0.0980533	0.102939	0.174836
APOLD1	1	48216410..48217150	ENSGALG00000011784	16	15	11	17	37	18	19	29	0.630528	0.56827	0.487095	0.682105	1.16877	0.852112	0.96236	1.14242	1.6623	1.44869	1.21088	1.67353	3.08972	2.13118	2.469	2.89671	0.712666	0.5991	0.503062	0.728921	1.16304	0.88248	0.977924	1.26756
DDX47	1	48224634..48233521	ENSGALG00000011794	783	912	739	957	946	682	536	756	9.16785	10.2655	9.72272	11.4087	8.8785	9.59247	8.06623	8.84857	24.1698	26.1699	24.1699	27.991	23.471	23.9913	20.6944	22.4362	34.8761	36.4253	33.7966	41.034	29.7361	33.4362	27.5877	33.044
ENSGALG00000011796	1	48250644..48251708	ENSGALG00000011796	2102	3126	1160	2549	2910	1944	1103	2711	57.6349	82.3988	35.7395	71.1608	63.957	64.0308	38.8712	74.3066	151.947	210.06	88.8455	174.591	169.075	160.145	99.7266	188.41	93.6264	124.852	53.0502	109.295	91.4716	95.3078	56.7711	118.495
HEBP1	1	complement(48267769..48274299)	ENSGALG00000011798	2174	2739	1635	2785	2298	1966	2560	3089	22.3613	27.0837	18.897	29.1662	18.9465	24.2918	33.8436	31.7614	58.9526	69.0447	46.9763	71.5587	50.0865	60.7553	86.8279	80.5337	96.8334	109.396	74.7733	119.414	72.2343	96.3864	131.762	135.017
ENSGALG00000011799	1	complement(48276513..48283640)	ENSGALG00000011799	80	110	93	129	168	67	54	66	1.18164	1.56195	1.54353	1.94001	1.98906	1.1888	1.02515	0.974507	3.11524	3.98189	3.8371	4.75977	5.25822	2.97327	2.6301	2.47094	3.56333	4.3934	4.25316	5.53123	5.28083	3.28479	2.77936	2.88479
FAM234B	1	48289208..48311026	ENSGALG00000011800	403	602	435	501	765	400	432	416	2.91579	4.18723	3.53653	3.69069	4.43665	3.47657	4.01731	3.00877	7.6871	10.6745	8.79154	9.05502	11.7286	8.6951	10.3066	7.62899	17.9503	24.0439	19.8938	21.4817	24.0467	19.6107	22.2349	18.1829
GSG1	1	complement(48311863..48318536)	ENSGALG00000011802	0	0	0	0	3	0	0	0	0	0	0	0	0.0740726	0	0	0	0	0	0	0	0.195816	0	0	0	0	0	0	0	0.0943006	0	0	0
EMP1	1	48351489..48365693	ENSGALG00000011803	1827	2856	989	2360	2682	1433	991	1671	24.7338	37.1697	15.0448	32.5299	29.104	23.3044	17.2435	22.6138	65.2074	94.7571	37.4001	79.8113	76.9387	58.2857	44.2393	57.3391	81.3775	114.069	45.2299	101.191	84.3048	70.2552	51.0065	73.0377
ENSGALG00000011809	1	complement(48493791..48517851)	ENSGALG00000011809	5	1	1	1	1	0	3	0	0.0527862	0.0101491	0.0118628	0.010749	0.00846238	0	0.0407072	0	0.139164	0.0258733	0.02949	0.0263724	0.0223709	0	0.104437	0	0.222708	0.03994	0.0457329	0.0428777	0.0314335	0	0.154409	0
ENSGALG00000041348	1	complement(48520716..48659867)	ENSGALG00000041348	1	0	0	0	2	0	0	0	0.0156491	0	0	0	0.0250878	0	0	0	0.0412569	0	0	0	0.0663215	0	0	0	0.0445416	0	0	0	0.0628671	0	0	0
ATF7IP	1	48864006..48924443	ENSGALG00000011814	1164	1165	962	1015	1662	1026	953	1202	6.18343	5.94951	5.74234	5.48986	7.07701	6.54733	6.50683	6.38302	16.3018	15.1671	14.275	13.4692	18.7086	16.3752	16.6937	16.1847	51.8464	46.5301	43.9951	43.5209	52.2425	50.3013	49.0506	52.5382
PLBD1	1	complement(48929924..48958286)	ENSGALG00000029583	1197	1071	1110	1058	1199	1147	857	1067	22.4929	19.3473	23.4375	20.2421	18.0598	25.8914	20.6982	20.0429	59.2996	49.3222	58.2638	49.6635	47.7424	64.7558	53.1025	50.8204	53.3163	42.7757	50.7636	45.3646	37.6888	56.2336	44.1095	46.6375
GUCY2C	1	complement(48969433..49014451)	ENSGALG00000011838	12961	15366	15287	19014	23619	14758	13473	17076	117.576	134.005	155.826	175.62	171.745	160.823	157.089	154.851	309.975	341.62	387.372	430.879	454.022	402.228	403.022	392.636	577.304	613.718	699.119	815.277	742.429	723.535	693.451	746.374
TTC26	1	49026548..49071853	ENSGALG00000011847	80	96	115	102	177	134	105	122	1.18224	1.36385	1.90964	1.53474	2.09667	2.37881	1.99437	1.80227	3.11682	3.47687	4.7472	3.76544	5.54271	5.94955	5.11667	4.56981	3.56333	3.83424	5.25929	4.37353	5.56374	6.56957	5.40432	5.33249
UBN2	1	49084168..49132365	ENSGALG00000011854	1123	1208	968	997	1505	890	902	1201	7.01606	7.25537	6.79558	6.34201	7.5369	6.6795	7.24303	7.5007	18.4969	18.4962	16.8933	15.56	19.9243	16.7058	18.5824	19.0186	50.0202	48.2475	44.2695	42.7491	47.3075	43.6337	46.4256	52.4945
FMC1	1	49141973..49142442	ENSGALG00000011856	216	210	225	223	227	193	156	231	16.6865	15.5958	19.5313	17.5402	14.0565	17.9105	15.4894	17.8389	43.9917	39.7586	48.5532	43.0344	37.1595	44.7952	39.7391	45.2319	9.62099	8.3874	10.2899	9.56173	7.13541	9.46214	8.02927	10.0968
LUC7L2	1	49145298..49176552	ENSGALG00000036238	2090	2453	2357	2694	2813	1927	1855	2054	27.0887	30.5645	34.3272	35.5514	29.2249	30.0029	30.9019	26.6126	71.4157	77.9184	85.3346	87.2246	77.2582	75.0389	79.2807	67.4783	93.0919	97.9728	107.793	115.513	88.4225	94.4744	95.4763	89.7782
GBE	1	complement(49180327..49185207)	ENSGALG00000011859	35	30	72	55	14	40	42	50	0.727953	0.59984	1.68269	1.16471	0.233403	0.999391	1.12275	1.03956	1.91915	1.52918	4.18304	2.85758	0.617017	2.49953	2.88049	2.63589	1.55896	1.1982	3.29277	2.35827	0.44007	1.96107	2.16173	2.18545
ENSGALG00000028016	1	complement(49189519..49197004)	ENSGALG00000028016	4574	5306	7291	8300	1398	4246	4994	5177	28.0779	31.3123	50.2914	51.8759	6.8789	31.3104	39.4019	31.7682	74.0238	79.8248	125.02	127.276	18.1849	78.3092	101.088	80.5508	203.733	211.922	333.439	355.885	43.9441	208.167	257.04	226.281
ENSGALG00000019325	1	49197217..49205179	ENSGALG00000019325	2065	2625	4182	4320	254	2086	2207	2265	63.4077	77.4872	144.292	135.059	6.2517	76.9443	87.1012	69.5241	167.166	197.539	358.699	331.364	16.5268	192.442	223.464	176.284	91.9784	104.843	191.255	185.232	7.98412	102.27	113.594	99.0008
POLDIP3	1	49207530..49221469	ENSGALG00000011863	2180	2462	2248	2498	2885	1941	2028	2160	20.1388	21.8648	23.3352	23.4957	21.3632	21.5399	24.0794	19.947	53.0934	55.74	58.0094	57.6462	56.4752	53.8725	61.7772	50.5771	97.1007	98.3323	102.808	107.109	90.6858	95.1607	104.381	94.4113
RRP7A	1	49224852..49228486	ENSGALG00000011866	524	689	584	721	806	535	488	526	11.8524	14.9822	14.8432	16.6046	14.6135	14.5368	14.1872	11.8934	31.2474	38.1941	36.8989	40.7391	38.6318	36.3575	36.3981	30.1567	23.3398	27.5187	26.708	30.9148	25.3354	26.2293	25.1172	22.9909
SERHL2	1	complement(49229293..49237511)	ENSGALG00000011867	913	1065	923	1113	1306	888	786	1033	15.9359	17.8704	18.1028	19.7797	18.2722	18.6191	17.6331	18.024	42.013	45.5572	45.0021	48.5291	48.304	46.5675	45.2388	45.7014	40.6665	42.5361	42.2115	47.7229	41.0522	43.5357	40.4552	45.1514
SOCS1L	1	49252363..49262777	ENSGALG00000023193	214	275	209	182	376	200	182	160	3.52856	4.35909	3.87229	3.05544	4.96951	3.96145	3.85705	2.63724	9.30259	11.1127	9.62619	7.49645	13.1373	9.9078	9.8955	6.68692	9.5319	10.9835	9.55818	7.80374	11.819	9.80533	9.36748	6.99343
TCF20	1	49309337..49424563	ENSGALG00000011878	1363	1517	1218	1345	2205	1374	1116	1509	6.59509	7.0565	6.62231	6.62622	8.55216	7.98642	6.94048	7.29893	17.3871	17.9892	16.4625	16.2573	22.6083	19.9745	17.8062	18.507	60.7102	60.589	55.7027	57.6705	69.311	67.3626	57.4402	65.9568
CYP2D6	1	49442475..49451655	ENSGALG00000011894	27062	33811	25652	24895	41131	34724	17468	26812	281.226	337.779	299.54	263.406	342.616	433.477	233.313	278.529	741.416	861.103	744.632	646.262	905.731	1084.15	598.579	706.233	1205.38	1350.41	1173.14	1067.44	1292.89	1702.4	899.072	1171.92
NDUFA6	1	49452440..49454008	ENSGALG00000035223	1250	1306	1189	1574	1526	1189	909	1355	68.1001	68.4006	72.7875	87.3093	66.6399	77.8143	63.6504	73.7942	179.537	174.374	180.944	214.211	176.168	194.618	163.299	187.111	55.677	52.1616	54.3765	67.4895	47.9676	58.2927	46.7859	59.2256
SMDT1	1	complement(49454792..49456765)	ENSGALG00000011897	1949	2380	1548	2221	2401	1885	1693	2344	35.4379	41.6019	31.6275	41.1172	34.9938	41.1726	39.5652	42.6049	93.4275	106.056	78.6235	100.88	92.5087	102.975	101.507	108.028	86.8116	95.0572	70.7946	95.2314	75.4719	92.4152	87.1382	102.454
PHETA2	1	complement(49460280..49461035)	ENSGALG00000011898	372	486	361	449	641	308	329	390	14.3689	18.0466	15.6684	17.6581	19.8464	14.2913	16.3334	15.0588	37.8817	46.0064	38.9504	43.3239	52.4653	35.7433	41.9043	38.1828	16.5695	19.4108	16.5096	19.2521	20.1489	15.1002	16.9335	17.0465
NAGA	1	49462139..49466445	ENSGALG00000011900	1149	1536	1298	1592	2285	1346	1104	1545	13.6614	17.5568	17.3415	19.2724	21.7772	19.2247	16.8711	18.3632	36.0164	44.7576	43.1095	47.2843	57.5697	48.082	43.2838	46.5613	51.1783	61.3478	59.3613	68.2613	71.8256	65.9899	56.8225	67.5303
WBP2NL	1	complement(49466983..49474798)	ENSGALG00000011908	2832	2931	2716	3015	4285	2725	2546	2980	23.5876	23.4685	25.4189	25.568	28.6077	27.2645	27.2552	24.8114	62.1856	59.8284	63.1895	62.7304	75.6267	68.19	69.9248	62.9114	126.142	117.064	124.211	129.276	134.693	133.598	131.042	130.253
SEPT3	1	complement(49477085..49488049)	ENSGALG00000011913	0	1	0	0	5	1	1	3	0	0.0192278	0	0	0.0801608	0.0240264	0.0257069	0.0599813	0	0.0490175	0	0	0.211911	0.0600915	0.0659526	0.152087	0	0.03994	0	0	0.157168	0.0490266	0.0514697	0.131127
ENSGALG00000031189	1	complement(49491922..49492128)	ENSGALG00000031189	0	0	0	0	0	0	0	0	0	0	0	0	0	0	0	0	0	0	0	0	0	0	0	0	0	0	0	0	0	0	0	0
CENPM	1	49496089..49502094	ENSGALG00000011914	73	83	107	101	128	79	79	60	1.14978	1.25675	1.89371	1.61969	1.61601	1.49472	1.59926	0.944689	3.03125	3.20385	4.70761	3.97388	4.27205	3.73838	4.10301	2.39534	3.25154	3.31502	4.89342	4.33065	4.02349	3.87311	4.0661	2.62254
TNFRSF13C	1	49510784..49512391	ENSGALG00000019322	0	1	5	2	0	0	2	2	0	0.0377319	0.220514	0.0799241	0	0	0.100893	0.0784702	0	0.0961902	0.548181	0.196092	0	0	0.258846	0.198967	0	0.03994	0.228665	0.0857554	0	0	0.102939	0.0874179
ENSGALG00000045762	1	49521584..49526650	ENSGALG00000045762	0	3	0	0	1	1	2	0	0	0.128185	0	0	0.035627	0.0533921	0.114253	0	0	0.326783	0	0	0.0941826	0.133537	0.293123	0	0	0.11982	0	0	0.0314335	0.0490266	0.102939	0
SREBF2	1	complement(49527794..49546551)	ENSGALG00000041687	10763	8532	7011	8266	10896	8099	6993	10794	75.5695	57.5895	55.3134	59.0918	61.3229	68.3101	63.1069	75.7602	199.229	146.813	137.505	144.98	162.112	170.847	161.905	192.096	479.401	340.768	320.634	354.427	342.5	397.067	359.927	471.794
CCDC134	1	complement(49545405..49549775)	ENSGALG00000011918	474	507	387	552	619	495	355	527	13.6638	14.0501	12.5355	16.2013	14.303	17.1411	13.1529	15.1862	36.0228	35.8181	31.1622	39.7496	37.8109	42.8708	33.7446	38.5058	21.1127	20.2496	17.6986	23.6685	19.4574	24.2682	18.2717	23.0346
MEI1	1	complement(49551210..49586894)	ENSGALG00000031186	58	85	64	54	109	96	64	68	0.451286	0.635802	0.559553	0.427795	0.679818	0.897295	0.640035	0.528905	1.18976	1.62085	1.391	1.04959	1.79715	2.24418	1.64205	1.34108	2.58341	3.3949	2.92691	2.3154	3.42626	4.70656	3.29406	2.97221
SNU13	1	49587218..49590797	ENSGALG00000011931	2596	2582	2256	2671	3391	2178	1973	2660	33.5131	32.0439	32.7255	35.1077	35.0897	33.776	32.7368	34.3271	88.3529	81.6897	81.353	86.1358	92.7623	84.4756	83.9884	87.039	115.63	103.125	103.173	114.526	106.591	106.78	101.55	116.266
XRCC6	1	complement(49591963..49606037)	ENSGALG00000011932	875	885	667	961	1115	729	682	888	11.2809	10.9687	9.66267	12.6147	11.5226	11.2902	11.301	11.4444	29.7405	27.9627	24.0206	30.9498	30.4609	28.2374	28.9935	29.0181	38.9739	35.3469	30.5039	41.2055	35.0484	35.7404	35.1023	38.8136
DESI1	1	49605385..49616465	ENSGALG00000011934	2448	2365	1986	2122	2673	1968	1564	2398	66.9333	62.1643	61.0165	59.0738	58.5831	64.6392	54.9627	65.5429	176.461	158.476	151.682	144.936	154.869	161.666	141.01	166.189	109.038	94.4581	90.8256	90.9865	84.0219	96.4844	80.4986	104.814
PMM1	1	49620066..49625819	ENSGALG00000038599	861	674	537	569	721	602	471	705	20.6085	15.5089	14.4429	13.8667	13.8331	17.3093	14.4898	16.8685	54.3315	39.537	35.9039	34.0216	36.5689	43.2915	37.1746	42.7715	38.3503	26.9196	24.5586	24.3974	22.6636	29.514	24.2422	30.8148
CSDC2	1	complement(49627010..49631391)	ENSGALG00000030101	2	2	4	6	6	4	3	4	0.0368238	0.0354004	0.0827554	0.112478	0.0885509	0.0884707	0.0709938	0.0736214	0.0970813	0.0902465	0.205723	0.275963	0.234091	0.22127	0.182139	0.186673	0.0890832	0.07988	0.182932	0.257266	0.188601	0.196107	0.154409	0.174836
POLR3H	1	49635292..49641645	ENSGALG00000011947	623	604	558	684	812	542	426	496	12.1283	11.3039	12.2063	13.5577	12.671	12.6751	10.6591	9.65246	31.9746	28.817	30.3438	33.2635	33.4966	31.7011	27.3466	24.4746	27.7494	24.1238	25.519	29.3284	25.524	26.5724	21.9261	21.6796
ACO2	1	complement(49642668..49663097)	ENSGALG00000011950	13321	11822	9703	12038	13072	9279	8201	12795	132.943	113.422	108.811	122.321	104.571	111.242	105.195	127.648	350.486	289.148	270.495	300.111	276.442	278.223	269.884	323.661	593.339	472.171	443.747	516.162	410.899	454.918	422.103	559.256
PHF5A	1	49663357..49669387	ENSGALG00000011953	1623	1679	1369	1660	1737	1208	1219	1427	47.9694	47.7062	45.4659	49.9542	41.1517	42.8896	46.3073	42.1614	126.465	121.618	113.025	122.561	108.787	107.269	118.804	106.903	72.291	67.0593	62.6084	71.177	54.6001	59.2242	62.7415	62.3727
TOB2	1	49674134..49680930	ENSGALG00000011957	3807	4171	2878	3461	4601	3279	2660	4054	27.9883	29.479	23.775	25.9068	27.1136	28.9584	25.1348	29.7935	73.7874	75.151	59.1028	63.5616	71.6769	72.4266	64.4848	75.5439	169.57	166.59	131.619	148.4	144.626	160.758	136.909	177.196
TEF	1	complement(49698484..49713034)	ENSGALG00000011958	815	690	710	594	966	590	719	806	20.0329	16.3047	19.6102	14.8659	19.0329	17.4212	22.7151	19.8046	52.8141	41.5658	48.7493	36.4731	50.3149	43.5714	58.277	50.2162	36.3014	27.5586	32.4704	25.4694	30.3648	28.9257	37.0067	35.2294
ZC3H7B	1	complement(49724080..49760506)	ENSGALG00000011965	1615	1385	1239	1167	1904	1121	1099	1601	15.0527	12.41	12.9763	11.0747	14.225	12.5513	13.1656	14.9169	39.6845	31.6368	32.258	27.1715	37.6047	31.3914	33.7771	37.823	71.9347	55.3169	56.6631	50.0383	59.8495	54.9589	56.5652	69.978
RANGAP1	1	49768544..49787684	ENSGALG00000011966	1838	2672	2087	2011	2604	1571	1657	2207	20.3844	28.4883	26.0083	22.7082	23.1491	20.9299	23.6197	24.468	53.7407	72.6255	64.6544	55.7139	61.1965	52.3469	60.5978	62.0407	81.8675	106.72	95.4446	86.2271	81.8529	77.0209	85.2853	96.4657
CHADL	1	49788795..49792401	ENSGALG00000011970	181	21	16	120	96	78	22	53	1.96412	0.219072	0.195095	1.32583	0.83503	1.01677	0.30684	0.574923	5.17814	0.558482	0.48499	3.2529	2.20746	2.543	0.787216	1.45776	8.06203	0.83874	0.731727	5.14533	3.01762	3.82408	1.13233	2.31657
L3MBTL2	1	complement(49793237..49807832)	ENSGALG00000011976	547	663	581	627	906	628	513	591	5.52894	6.44239	6.59885	6.45269	7.34049	7.62526	6.66457	5.97156	14.5763	16.4236	16.4042	15.8315	19.4051	19.0712	17.0984	15.1414	24.3643	26.4802	26.5708	26.8843	28.4788	30.7887	26.4039	25.832
EP300	1	complement(49814540..49870572)	ENSGALG00000011992	2993	2478	1903	1900	3784	2034	2003	2763	11.8798	9.45544	8.48746	7.67845	12.0391	9.69823	10.2184	10.963	31.3195	24.1048	21.0991	18.8389	31.8263	24.2558	26.2159	27.7975	133.313	98.9713	87.0298	81.4677	118.945	99.7202	103.094	120.768
ENSGALG00000041607	1	49815089..49815640	ENSGALG00000041607	0	0	0	36	0	45	0	0	0	0	0	1.93903	0	2.85967	0	0	0	0	0	4.75736	0	7.1522	0	0	0	0	0	1.5436	0	2.2062	0	0
RBX1	1	complement(49895082..49906115)	ENSGALG00000011993	985	1011	933	1081	1161	864	702	948	51.5471	50.8626	54.8639	57.5986	48.7015	54.3153	47.2177	49.5931	135.897	129.664	136.387	141.317	128.746	135.846	121.14	125.747	43.8735	40.3793	42.6688	46.3508	36.4943	42.359	36.1317	41.4361
XPNPEP3	1	complement(49925280..49940335)	ENSGALG00000012003	605	673	608	729	997	633	557	647	8.95428	9.57567	10.1115	10.9855	11.828	11.2543	10.5957	9.57249	23.6068	24.4113	25.1364	26.9527	31.2683	28.1477	27.184	24.2718	26.9477	26.8796	27.8056	31.2579	31.3392	31.0339	28.6686	28.2797
ST13	1	49940630..49960414	ENSGALG00000012007	2547	3513	3017	2731	3292	2223	2489	2920	26.2256	34.7739	34.9067	28.631	27.1705	27.4964	32.9398	30.0555	69.1403	88.6493	86.7753	70.2454	71.8273	68.77	84.5091	76.2082	113.447	140.309	137.976	117.099	103.479	108.986	128.108	127.63
SLC25A17	1	49965709..49979823	ENSGALG00000012013	1542	1576	1312	1182	1425	1138	1042	1325	26.4406	25.979	25.2789	20.6359	19.586	23.4407	22.9644	22.7117	69.7073	66.2285	62.8414	50.6297	51.7769	58.6264	58.9166	57.5872	68.6831	62.9454	60.0016	50.6815	44.7928	55.7923	53.6314	57.9144
MKL1	1	50007129..50093845	ENSGALG00000012024	1585	1270	1082	978	1885	1076	1051	1428	13.323	10.2625	10.2197	8.37008	12.7007	10.8649	11.3547	11.999	35.1243	26.1624	25.4053	20.5358	33.5751	27.1737	29.1312	30.4245	70.5984	50.7238	49.483	41.9344	59.2522	52.7527	54.0946	62.4164
SGSM3	1	complement(50098087..50115325)	ENSGALG00000012033	357	399	363	319	532	264	257	316	4.68323	5.03187	5.35083	4.26075	5.59411	4.16027	4.33322	4.1439	12.3467	12.8278	13.3017	10.4537	14.7884	10.4051	11.1171	10.5072	15.9014	15.9361	16.6011	13.678	16.7226	12.943	13.2277	13.812
ADSL	1	complement(50125302..50140927)	ENSGALG00000012034	1716	1654	1612	1723	2428	1566	1306	1661	32.4964	30.1115	34.3021	33.2217	36.8561	35.6246	31.7878	31.4436	85.6725	76.7635	85.2722	81.5086	97.4317	89.0991	81.5537	79.7279	76.4334	66.0608	73.7215	73.8783	76.3206	76.7757	67.2194	72.6006
ENSGALG00000012050	1	complement(50154486..50243306)	ENSGALG00000012050	1066	528	460	466	646	365	459	862	5.68247	2.70578	2.75534	2.52921	2.76029	2.33729	3.1448	4.59338	14.9811	6.89788	6.84956	6.20535	7.29704	5.8457	8.06818	11.6469	47.4813	21.0883	21.0371	19.981	20.3061	17.8947	23.6246	37.6771
FAM83F	1	complement(50300711..50313130)	ENSGALG00000045936	950	1177	889	903	1059	818	804	1402	17.0926	20.3582	17.9731	16.5421	15.2729	17.6798	18.5926	25.216	45.0623	51.8993	44.6797	40.5856	40.3751	44.2182	47.7004	63.9373	42.3145	47.0094	40.6566	38.7186	33.2881	40.1038	41.3816	61.28
ENSGALG00000012056	1	complement(50333673..50345718)	ENSGALG00000012056	352	367	406	353	492	308	268	224	5.28748	5.2997	6.85282	5.39882	5.92398	5.55772	5.17417	3.36356	13.9398	13.5106	17.0356	13.2459	15.6605	13.9002	13.2747	8.52858	15.6786	14.658	18.5676	15.1358	15.4653	15.1002	13.7939	9.79081
CACNA1I	1	complement(50445737..50593849)	ENSGALG00000035051	6	4	0	4	12	13	8	3	0.0269633	0.0172807	0	0.0183021	0.0432261	0.0701788	0.0462075	0.0134769	0.0710854	0.0440539	0	0.0449038	0.114271	0.175521	0.118548	0.0341717	0.26725	0.15976	0	0.171511	0.377202	0.637346	0.411757	0.131127
ENSGALG00000032429	1	50605144..50605362	ENSGALG00000032429	0	0	0	0	3	0	0	0	0	0	0	0	0.320643	0	0	0	0	0	0	0	0.847644	0	0	0	0	0	0	0	0.0943006	0	0	0
RPS19BP1	1	50625401..50627545	ENSGALG00000029810	672	769	556	790	858	583	556	685	20.3561	22.3939	18.9251	24.3652	20.8331	21.2146	21.6471	20.7425	53.6662	57.0891	47.0462	59.7796	55.074	53.0588	55.537	52.5943	29.932	30.7139	25.4275	33.8734	26.97	28.5825	28.6171	29.9406
ATF4	1	complement(50633582..50636513)	ENSGALG00000012135	10109	12083	10840	10458	15615	10480	9212	11219	203.303	233.609	244.964	214.142	251.721	253.185	238.117	225.546	535.982	595.541	608.961	525.393	665.444	633.229	610.903	571.89	450.271	482.595	495.745	448.415	490.835	513.799	474.139	490.371
MIEF1	1	complement(50648770..50653831)	ENSGALG00000012144	170	145	119	147	210	123	95	144	3.55858	2.91793	2.79906	3.13302	3.52363	3.09295	2.55595	3.01325	9.38174	7.43871	6.95824	7.6868	9.31496	7.73565	6.55744	7.64035	7.57207	5.7913	5.44222	6.30302	6.60104	6.03028	4.88962	6.29409
ENSGALG00000028989	1	complement(50654764..50654976)	ENSGALG00000028989	11	1	3	1	2	2	2	2	1.50805	0.131796	0.462148	0.139586	0.219783	0.329377	0.352414	0.274093	3.97577	0.335988	1.14886	0.34247	0.581014	0.82379	0.904139	0.694985	0.489958	0.03994	0.137199	0.0428777	0.0628671	0.0980533	0.102939	0.0874179
MGAT3	1	complement(50662884..50679863)	ENSGALG00000036743	5821	5884	3937	6384	9985	6270	4280	4792	26.3782	25.6329	20.047	29.4549	36.2691	34.1314	24.9282	21.7074	69.5426	65.3463	49.8353	72.267	95.8801	85.3646	63.9548	55.041	259.277	235.007	180.051	273.731	313.864	307.397	220.29	209.453
TAB1	1	complement(50694466..50702940)	ENSGALG00000012150	424	530	461	553	719	437	404	474	6.05741	7.27908	7.40048	8.04387	8.23366	7.49968	7.41827	6.76932	15.9696	18.5566	18.397	19.7354	21.7663	18.7571	19.032	17.1642	18.8856	21.1682	21.0829	23.7114	22.6007	21.4246	20.7937	20.718
SYNGR1	1	complement(50711697..50722039)	ENSGALG00000027665	179	148	167	144	221	135	154	172	5.47907	4.35507	5.74391	4.48781	5.42236	4.96396	6.05863	5.26293	14.4449	11.1024	14.2789	11.0107	14.3344	12.4151	15.5438	13.3446	7.97295	5.91112	7.6374	6.17439	6.94681	6.6186	7.92633	7.51794
RPL3	1	50725888..50731685	ENSGALG00000012172	23845	22924	25977	27931	34038	22080	21656	24067	443.224	409.634	542.566	528.605	507.145	493.021	517.374	447.191	1168.5	1044.28	1348.78	1296.92	1340.68	1233.07	1327.35	1133.89	1062.09	915.585	1188	1197.62	1069.93	1082.51	1114.63	1051.94
PDGFB	1	50759960..50771537	ENSGALG00000012178	109	127	114	87	149	86	78	99	2.89885	3.247	3.40676	2.3558	3.17635	2.74751	2.66621	2.63197	7.64245	8.27761	8.46895	5.77989	8.39692	6.87167	6.84033	6.67356	4.85503	5.07238	5.21355	3.73036	4.6836	4.21629	4.01463	4.32719
CBX7	1	50786846..50795719	ENSGALG00000041236	62	57	42	46	61	59	46	65	4.1054	3.62842	3.125	3.10127	3.23769	4.69306	3.91491	4.30251	10.8234	9.24996	7.76851	7.6089	8.55909	11.7376	10.0439	10.9094	2.76158	2.27658	1.92078	1.97237	1.91745	2.89257	2.36761	2.84108
CBX6	1	50804456..50812317	ENSGALG00000036867	150	160	169	165	271	167	154	178	3.13993	3.21979	3.97514	3.51666	4.54716	4.19938	4.14332	3.72472	8.278	8.20823	9.88187	8.62804	12.0207	10.5029	10.63	9.44432	6.68124	6.3904	7.72887	7.07482	8.51849	8.18745	7.92633	7.78019
NPTXR	1	50821123..50825285	ENSGALG00000041604	16	30	12	22	36	17	16	19	0.538894	0.971367	0.454153	0.754439	0.971915	0.687816	0.692633	0.639708	1.42072	2.47631	1.12899	1.851	2.56933	1.72027	1.77699	1.62203	0.712666	1.1982	0.548795	0.94331	1.13161	0.833453	0.823515	0.83047
DNAL4	1	50829383..50833632	ENSGALG00000043451	296	466	392	438	576	365	318	365	5.90812	8.94176	8.79187	8.90124	9.21558	8.75167	8.15803	7.28276	15.576	22.7953	21.8559	21.839	24.3621	21.8884	20.9299	18.466	13.1843	18.612	17.9273	18.7804	18.1057	17.8947	16.3674	15.9538
ENSGALG00000034504	1	50835752..50841816	ENSGALG00000034504	4	7	8	8	4	9	2	3	0.064462	0.108448	0.144868	0.131266	0.051671	0.174232	0.0414261	0.0483293	0.169946	0.276467	0.360129	0.322058	0.136596	0.435763	0.106281	0.122543	0.178166	0.27958	0.365863	0.343022	0.125734	0.44124	0.102939	0.131127
SUN2	1	50843549..50848761	ENSGALG00000028230	516	474	528	398	891	459	419	338	7.18544	6.34543	8.26181	5.64294	9.94544	7.67815	7.49925	4.70507	18.9435	16.1765	20.5382	13.8448	26.2915	19.2035	19.2398	11.9301	22.9835	18.9316	24.147	17.0653	28.0073	22.5032	21.5658	14.7736
GTPBP1	1	complement(50851186..50868402)	ENSGALG00000030783	3010	3070	2389	2875	4627	2649	2428	2946	20.8136	20.4079	18.5624	20.2413	25.6462	22.0041	21.5789	20.3638	54.8724	52.0261	46.1447	49.6614	67.7976	55.0335	55.3621	51.6341	134.07	122.616	109.256	123.273	145.443	129.872	124.968	128.767
JOSD1	1	50869595..50876857	ENSGALG00000041766	112	109	124	138	227	98	114	124	5.34403	4.99984	6.64829	6.70422	8.68199	5.61716	6.99126	5.9145	14.0888	12.7461	16.5271	16.4487	22.9515	14.0488	17.9365	14.9967	4.98866	4.35346	5.67088	5.91712	7.13541	4.80461	5.86754	5.41991
TOMM22	1	complement(50879538..50881332)	ENSGALG00000019316	1913	2647	1911	2500	3106	1886	1746	2238	50.0556	66.5842	56.187	66.6034	65.1451	59.2816	58.7195	58.5387	131.965	169.744	139.676	163.41	172.216	148.267	150.649	148.43	85.2081	105.721	87.3956	107.194	97.6326	92.4643	89.8661	97.8206
CBY1	1	complement(50881482..50883895)	ENSGALG00000012218	155	214	245	205	259	175	204	164	3.88515	5.15667	6.90049	5.23177	5.20378	5.26932	6.57214	4.10928	10.2427	13.1459	17.1541	12.836	13.7566	13.1789	16.8612	10.4194	6.90395	8.54716	11.2046	8.78993	8.14129	8.57966	10.4998	7.16827
DMC1	1	50896431..50910979	ENSGALG00000012236	15	31	18	23	19	15	21	22	0.275311	0.546982	0.371229	0.429812	0.27953	0.330722	0.495395	0.403645	0.725821	1.39442	0.922846	1.05453	0.738958	0.827155	1.27097	1.02348	0.668124	1.23814	0.823193	0.986187	0.597237	0.7354	1.08086	0.961597
DDX17	1	50911713..50928816	ENSGALG00000037360	4018	4484	3511	3705	6161	3349	2934	4125	50.0131	53.6561	49.1069	46.9549	61.4707	50.076	46.9391	51.3267	131.853	136.786	122.076	115.203	162.502	125.243	120.425	130.143	178.968	179.091	160.568	158.862	193.662	164.19	151.012	180.299
ENSGALG00000044020	1	50925862..50926153	ENSGALG00000044020	59	74	55	51	66	74	42	51	6.67782	8.05181	6.99492	5.87721	5.98782	10.0613	6.10987	5.77029	17.6052	20.5265	17.3888	14.4196	15.8293	25.1639	15.6753	14.631	2.62795	2.95556	2.51531	2.18676	2.07461	3.62797	2.16173	2.22916
KDELR3	1	complement(50931515..50936669)	ENSGALG00000032313	750	830	625	602	914	411	514	614	12.4863	13.284	11.692	10.2044	12.1972	8.21968	10.9986	10.2185	32.9185	33.8651	29.0655	25.0363	32.2443	20.5579	28.2175	25.9098	33.4062	33.1502	28.5831	25.8124	28.7303	20.15	26.4554	26.8373
KCNJ4	1	50948357..50950627	ENSGALG00000012254	22	35	10	8	49	12	15	20	0.485585	0.742659	0.248016	0.179784	0.866924	0.318173	0.425533	0.441283	1.28018	1.89327	0.616548	0.441096	2.29178	0.79577	1.09173	1.11891	0.979915	1.3979	0.457329	0.343022	1.54024	0.58832	0.772045	0.874179
CSNK1E	1	50962355..50982806	ENSGALG00000032257	2848	2972	1975	2253	3462	2291	1836	2665	53.2088	53.3791	41.4618	42.8571	51.8457	51.4172	44.0876	49.7721	140.278	136.08	103.071	105.149	137.058	128.597	113.109	126.201	126.854	118.702	90.3225	96.6035	108.823	112.32	94.4983	116.484
TMEM184B	1	50984686..51010077	ENSGALG00000012272	3775	3827	2766	3266	4332	3526	2552	4198	31.0521	30.263	25.566	27.3532	28.5631	34.8415	26.9808	34.5193	81.8648	77.1496	63.5551	67.1105	75.5086	87.1405	69.2209	87.5264	168.145	152.85	126.497	140.039	136.17	172.868	131.351	183.49
MAFF	1	complement(51010583..51013540)	ENSGALG00000012277	460	628	428	569	546	370	400	476	7.44188	9.76706	7.78048	9.3725	7.08044	7.19063	8.31735	7.69799	19.6196	24.8992	19.3416	22.9952	18.7177	17.9842	21.3387	19.5189	20.4891	25.0823	19.5737	24.3974	17.1627	18.1399	20.5879	20.8055
PLA2G6	1	51014060..51031978	ENSGALG00000012281	339	407	336	317	443	317	280	331	4.14021	4.77855	4.61104	3.94185	4.33679	4.65074	4.39522	4.04107	10.9151	12.182	11.4627	9.67124	11.4646	11.6318	11.2762	10.2464	15.0996	16.2556	15.3663	13.5922	13.9251	15.5414	14.4115	14.4677
BAIAP2L2	1	51034057..51041742	ENSGALG00000012285	1829	1967	1637	1843	2440	1854	1306	2298	33.1323	34.2547	33.3214	33.9923	35.4299	40.3448	30.4075	41.6133	87.3489	87.3259	82.8343	83.3994	93.6615	100.905	78.0123	105.514	81.4666	78.562	74.8648	79.0236	76.6978	90.8954	67.2194	100.443
SLC16A8	1	51043333..51051000	ENSGALG00000036897	11	9	3	11	17	14	17	20	0.131807	0.103674	0.0403929	0.134202	0.163282	0.201519	0.261816	0.239564	0.347493	0.264296	0.100414	0.329261	0.431648	0.504009	0.671705	0.607434	0.489958	0.35946	0.137199	0.471655	0.53437	0.686373	0.874985	0.874179
PICK1	1	complement(51055004..51064269)	ENSGALG00000041823	369	413	378	397	494	347	320	387	8.07137	8.68461	9.29074	8.84158	8.66145	9.11781	8.99645	8.46208	21.2791	22.1397	23.096	21.6926	22.8972	22.8042	23.0809	21.4563	16.4359	16.4952	17.287	17.0225	15.5282	17.0122	16.4703	16.9154
SOX10	1	51089596..51098755	ENSGALG00000012290	83	99	99	111	245	89	106	110	0.728497	0.835341	0.976387	0.991952	1.72369	0.938382	1.19579	0.965133	1.92059	2.12954	2.42722	2.43373	4.55669	2.34695	3.06788	2.44717	3.69695	3.95406	4.52756	4.75943	7.70122	4.36337	5.45579	4.80799
POLR2F	1	complement(51101687..51105270)	ENSGALG00000012291	1093	1489	1264	1480	1508	1326	935	1299	61.9748	81.165	80.534	85.4427	68.5392	90.3189	68.1407	73.6291	163.389	206.915	200.201	209.632	181.188	225.893	174.819	186.692	48.684	59.4707	57.8064	63.459	47.4018	65.0093	48.1241	56.7779
C22orf23	1	51105368..51109027	ENSGALG00000012293	22	16	10	14	12	17	15	13	0.66642	0.465934	0.340379	0.431789	0.291373	0.618606	0.584005	0.393653	1.75693	1.18781	0.846155	1.05938	0.770265	1.54717	1.4983	0.998139	0.979915	0.63904	0.457329	0.600288	0.377202	0.833453	0.772045	0.568216
MICALL1	1	complement(51109677..51127827)	ENSGALG00000012265	1563	1902	1640	1464	2582	1284	1360	1484	9.25794	10.8304	10.9153	8.82907	12.259	9.13609	10.3537	8.78688	24.4074	27.61	27.1346	21.6619	32.4075	22.8499	26.563	22.2798	69.6185	75.9659	75.002	62.773	81.1614	62.9502	69.9988	64.8641
EIF3L	1	complement(51131447..51141068)	ENSGALG00000012296	4929	5053	5087	5237	9510	5806	4414	5068	73.6608	72.5949	85.4234	79.6854	113.92	104.231	84.7833	75.7111	194.197	185.067	212.356	195.506	301.156	260.686	217.517	191.972	219.546	201.817	232.643	224.551	298.933	284.649	227.187	221.517
ENSGALG00000012299	1	51142127..51145354	ENSGALG00000012299	390	412	335	407	484	325	281	352	21.0898	21.4183	20.3559	22.4089	20.9796	21.1121	19.5306	19.0281	55.6006	54.6018	50.6032	54.9798	55.461	52.8026	50.1069	48.2474	17.3712	16.4553	15.3205	17.4512	15.2138	15.9337	14.463	15.3856
GALR3	1	complement(51151372..51153206)	ENSGALG00000012307	2	4	0	0	0	0	0	0	0.047175	0.0907028	0	0	0	0	0	0	0.124371	0.231229	0	0	0	0	0	0	0.0890832	0.15976	0	0	0	0	0	0
ENSGALG00000019312	1	51155785..51156504	ENSGALG00000019312	0	3	0	0	0	0	0	2	0	0.116969	0	0	0	0	0	0.0810858	0	0.29819	0	0	0	0	0	0.2056	0	0.11982	0	0	0	0	0	0.0874179
GCAT	1	complement(51158258..51162538)	ENSGALG00000012312	231	182	138	155	186	103	203	194	4.52415	3.42669	3.03697	3.09083	2.91998	2.42327	5.11	3.79815	11.9273	8.73569	7.54968	7.58327	7.71918	6.06074	13.11	9.6305	10.2891	7.26908	6.31114	6.64605	5.84664	5.04974	10.4483	8.47954
H1F0	1	complement(51163992..51164879)	ENSGALG00000044240	17	16	11	21	39	21	44	5	0.559034	0.505811	0.406461	0.703116	1.02801	0.829562	1.8597	0.164363	1.47382	1.28947	1.01043	1.72508	2.71761	2.07478	4.77117	0.416756	0.757207	0.63904	0.503062	0.900432	1.22591	1.02956	2.26467	0.218545
ENSGALG00000045591	1	complement(51169168..51170027)	ENSGALG00000045591	291	269	301	271	289	253	274	292	20.2323	17.9798	23.5156	19.1841	16.1062	21.1307	24.4852	20.2946	53.3399	45.836	58.458	47.0677	42.5779	52.8491	62.8183	51.4587	12.9616	10.7439	13.7656	11.6199	9.08429	12.4037	14.1027	12.763
ENSGALG00000034518	1	complement(51172152..51174975)	ENSGALG00000034518	1506	1169	1341	1245	1637	1181	1166	1249	33.8546	25.2631	33.8734	28.4958	29.4974	31.8921	33.6893	28.0673	89.2533	64.4034	84.2067	69.9138	77.9786	79.764	86.432	71.1669	67.0797	46.6899	61.3279	53.3828	51.4567	57.9005	60.0136	54.5925
ENSGALG00000012410	1	complement(51185912..51189759)	ENSGALG00000012410	528	578	483	607	641	429	425	511	14.5318	15.293	14.9373	17.0096	14.1412	14.1835	15.034	14.059	38.3113	38.9867	37.1329	41.7326	37.3834	35.4738	38.5708	35.6476	23.518	23.0853	22.089	26.0268	20.1489	21.0324	21.8746	22.3353
ENSGALG00000012416	1	51190391..51196500	ENSGALG00000012416	2763	2927	2251	3046	3686	2635	2381	2846	43.6361	44.4393	39.9465	48.9794	46.662	49.9903	48.3309	44.9309	115.041	113.289	99.3037	120.17	123.354	125.029	123.996	113.926	123.068	116.904	102.945	130.606	115.864	129.185	122.549	124.396
ENSGALG00000012419	1	51197788..51199334	ENSGALG00000012419	220	140	75	158	205	147	168	184	4.15274	2.5405	1.59078	3.0366	3.10176	3.33326	4.07588	3.47196	10.9482	6.47651	3.95456	7.45022	8.19973	8.33668	10.4569	8.80344	9.79915	5.5916	3.42997	6.77468	6.44388	7.20692	8.64691	8.04245
LGALS1	1	complement(51200887..51204052)	ENSGALG00000012420	422	386	519	498	837	441	661	417	23.2071	20.4068	32.071	27.884	36.8957	29.1331	46.7207	22.9239	61.1824	52.0231	79.7259	68.4128	97.5365	72.8635	119.865	58.1255	18.7966	15.4168	23.7354	21.3531	26.3099	21.6208	34.0215	18.2266
PDXP	1	complement(51216088..51219459)	ENSGALG00000023131	222	245	237	244	307	160	181	212	3.05499	3.24117	3.66474	3.41873	3.3864	2.64495	3.20137	2.91634	8.05408	8.26274	9.11024	8.38778	8.95219	6.61516	8.21331	7.39461	9.88824	9.7853	10.8387	10.4622	9.6501	7.84426	9.31601	9.2663
ENSGALG00000012422	1	complement(51220223..51226301)	ENSGALG00000012422	366	275	326	286	488	275	244	172	4.97564	3.59401	4.97993	3.9587	5.31778	4.49098	4.26342	2.33745	13.1176	9.16225	12.3797	9.71257	14.0579	11.2322	10.9381	5.92678	16.3022	10.9835	14.9089	12.263	15.3396	13.4823	12.5586	7.51794
GGA1	1	complement(51230967..51239478)	ENSGALG00000039658	1867	1683	1411	1522	1846	1324	1314	1833	26.5946	23.0469	22.5846	22.074	21.0777	22.6557	24.0571	26.1009	70.1131	58.7535	56.1436	54.1581	55.7204	56.6631	61.7201	66.181	83.1592	67.219	64.5292	65.2599	58.0263	64.9113	67.6312	80.1185
LGALS2	1	51250968..51253146	ENSGALG00000003213	24826	23680	22408	23226	19141	15255	17131	24260	898.329	823.739	911.107	855.7	555.183	663.103	796.731	877.536	2368.33	2099.96	2264.94	2099.44	1467.67	1658.46	2044.06	2225.06	1105.79	945.779	1024.78	995.878	601.669	747.902	881.727	1060.38
CDC42EP1	1	complement(51255996..51257906)	ENSGALG00000038556	125	192	172	168	232	170	157	147	4.47324	6.6053	6.91636	6.12124	6.65491	7.30805	7.22124	5.25865	11.7931	16.8389	17.1935	15.0183	17.5928	18.2778	18.5265	13.3337	5.5677	7.66848	7.86606	7.20346	7.29258	8.33453	8.08074	6.42522
CARD10	1	51268021..51286421	ENSGALG00000042365	356	346	339	371	553	291	294	380	3.01149	2.81376	3.22232	3.19539	3.74972	2.95709	3.19653	3.21337	7.9394	7.17313	8.01043	7.83981	9.91267	7.39585	8.2009	8.14775	15.8568	13.8192	15.5035	15.9076	17.3827	14.2668	15.1321	16.6094
MFNG	1	51290595..51300967	ENSGALG00000012442	43	20	35	32	58	27	22	27	1.2839	0.57408	1.17427	0.972818	1.38814	0.968428	0.844279	0.805884	3.38484	1.46351	2.91915	2.38679	3.66966	2.42209	2.16605	2.04338	1.91529	0.7988	1.60065	1.37209	1.82315	1.32372	1.13233	1.18014
ELFN2	1	51367779..51370205	ENSGALG00000012446	0	2	2	5	6	1	1	1	0	0.0231335	0.0270396	0.0612521	0.0578664	0.0144535	0.0154644	0.0120276	0	0.0589744	0.0672182	0.150281	0.152974	0.036149	0.0396748	0.0304969	0	0.07988	0.0914659	0.214389	0.188601	0.0490266	0.0514697	0.043709
CYTH4	1	complement(51420095..51439366)	ENSGALG00000012454	598	525	595	529	788	517	385	369	7.11009	6.00084	7.94929	6.40395	7.51004	7.38422	5.88349	4.38577	18.7448	15.298	19.7613	15.7119	19.8534	18.4684	15.0944	11.1205	26.6359	20.9685	27.2111	22.6823	24.7696	25.3468	19.8158	16.1286
RAC2	1	51448385..51457486	ENSGALG00000012456	1688	1279	1852	1281	2157	1324	1045	1084	48.8038	35.5493	60.1671	37.7093	49.9889	45.9842	38.8327	31.3296	128.665	90.626	149.571	92.5189	132.149	115.009	99.6276	79.4388	75.1862	51.0833	84.6974	54.9264	67.8021	64.9113	53.7858	47.3805
SSTR3	1	51460659..51465064	ENSGALG00000012457	9	7	4	1	3	1	8	5	0.199705	0.149322	0.0997341	0.0225925	0.0533593	0.0266555	0.228158	0.110908	0.526496	0.380667	0.247931	0.0554302	0.141059	0.0666669	0.585355	0.281215	0.400874	0.27958	0.182932	0.0428777	0.0943006	0.0490266	0.411757	0.218545
ENSGALG00000027067	1	51475822..51477420	ENSGALG00000027067	73	106	88	63	95	45	55	61	2.73294	3.81498	3.70193	2.40141	2.85085	2.02377	2.64649	2.28288	7.20505	9.72557	9.20269	5.89181	7.53642	5.06155	6.78974	5.78842	3.25154	4.23364	4.0245	2.7013	2.98619	2.2062	2.83083	2.66625
IL2RB	1	51492000..51505358	ENSGALG00000012472	1139	770	774	712	1065	722	594	566	10.2687	6.67361	7.84097	6.53566	7.69632	7.81931	6.883	5.10097	27.0721	17.0131	19.492	16.0351	20.3458	19.5565	17.6588	12.9339	50.7329	30.7538	35.3973	30.5289	33.4767	35.3972	30.573	24.7393
TMPRSS6	1	51508827..51526284	ENSGALG00000012483	11	6	2	7	9	6	2	8	0.135877	0.07125	0.0277602	0.0880382	0.0891127	0.089032	0.031753	0.0987848	0.358223	0.181638	0.0690096	0.216	0.235576	0.222674	0.0814643	0.250477	0.489958	0.23964	0.0914659	0.300144	0.282902	0.29416	0.102939	0.349672
KCTD17	1	complement(51527734..51536411)	ENSGALG00000042419	219	202	213	141	217	226	186	216	5.13662	4.55474	5.61371	3.36721	4.07976	6.36768	5.6072	5.06445	13.542	11.6114	13.9552	8.26138	10.7852	15.9259	14.3856	12.8413	9.75461	8.06788	9.74111	6.04576	6.82108	11.08	9.57336	9.44113
MPST	1	complement(51543105..51545997)	ENSGALG00000040840	1951	2409	2316	1982	2976	1849	1662	2207	32.6299	38.7324	43.5245	33.7505	39.8964	37.148	35.7264	36.8982	86.0244	98.7407	108.198	82.806	105.469	92.9092	91.6583	93.5584	86.9007	96.2155	105.917	84.9836	93.5462	90.6503	85.5426	96.4657
TST	1	51546120..51553306	ENSGALG00000012488	3789	4417	4418	4460	6188	4519	2817	4295	98.5252	110.415	129.088	118.08	128.978	141.158	94.1476	111.643	259.749	281.482	320.902	289.706	340.963	353.044	241.542	283.079	168.768	176.415	202.048	191.235	194.511	221.551	144.99	187.73
ENSGALG00000012490	1	51553940..51558937	ENSGALG00000012490	8	11	14	3	22	15	6	11	0.19764	0.26125	0.388642	0.0754613	0.435662	0.44516	0.190518	0.271658	0.521052	0.666007	0.966134	0.185143	1.15171	1.11337	0.488786	0.688811	0.356333	0.43934	0.640261	0.128633	0.691538	0.7354	0.308818	0.480799
ENSGALG00000025881	1	complement(51576859..51607306)	ENSGALG00000025881	158	145	321	136	420	178	244	145	0.873662	0.770785	1.99447	0.765673	1.86156	1.18235	1.73411	0.801492	2.30329	1.96497	4.9581	1.87856	4.92118	2.95713	4.44896	2.03225	7.03757	5.7913	14.6803	5.83137	13.2021	8.72674	12.5586	6.3378
NCF4	1	complement(51610637..51620775)	ENSGALG00000038141	50	36	61	43	73	40	37	19	0.744931	0.515618	1.02121	0.652278	0.871789	0.71589	0.708513	0.282973	1.96391	1.31447	2.53864	1.60035	2.30464	1.79048	1.81774	0.717501	2.22708	1.43784	2.78971	1.84374	2.29465	1.96107	1.90438	0.83047
PVALB	1	51645215..51653703	ENSGALG00000012522	3	1	2	1	0	1	3	1	0.0516228	0.0165424	0.0386712	0.0175202	0	0.020671	0.0663501	0.0172015	0.136097	0.0421718	0.0961335	0.0429854	0	0.0516992	0.170225	0.0436157	0.133625	0.03994	0.0914659	0.0428777	0	0.0490266	0.154409	0.043709
IFT27	1	51663627..51670724	ENSGALG00000042990	68	61	68	74	74	30	55	58	2.27978	1.96604	2.56171	2.526	1.98865	1.20822	2.36999	1.94383	6.01034	5.01205	6.36821	6.19749	5.25714	3.02182	6.08036	4.92873	3.02883	2.43634	3.10984	3.17295	2.32608	1.4708	2.83083	2.53512
CACNG2	1	51688915..51735455	ENSGALG00000031977	3	6	2	2	3	3	1	2	0.0901275	0.173287	0.0675155	0.0611765	0.0722436	0.108267	0.0386132	0.0600636	0.237609	0.441762	0.167838	0.150095	0.190981	0.270783	0.0990646	0.152296	0.133625	0.23964	0.0914659	0.0857554	0.0943006	0.14708	0.0514697	0.0874179
EIF3D	1	51754103..51761464	ENSGALG00000012529	4021	4456	4327	5244	7310	4206	4253	4403	63.4694	67.6168	76.7458	84.2775	92.4891	79.7517	86.2831	69.4743	167.329	172.376	190.784	206.773	244.502	199.464	221.365	176.158	179.102	177.973	197.886	224.851	229.779	206.206	218.901	192.451
FOXRED2	1	51761996..51770041	ENSGALG00000012530	91	77	58	77	149	76	78	64	1.30069	1.05804	0.931535	1.12058	1.70711	1.30493	1.43294	0.914448	3.42911	2.69728	2.31572	2.74932	4.51288	3.26371	3.6763	2.31866	4.05329	3.07538	2.65251	3.30158	4.6836	3.72603	4.01463	2.79737
TXN2	1	51772260..51785102	ENSGALG00000012532	1691	2069	1874	1826	2425	1999	1644	1772	45.595	53.6307	56.7781	50.1294	52.4117	64.7481	56.9739	47.762	120.205	136.721	141.146	122.991	138.554	161.939	146.17	121.104	75.3198	82.6359	85.7035	78.2947	76.2263	98.0043	84.6162	77.4523
MYH9	1	51802991..51870983	ENSGALG00000043092	64972	67620	49493	57335	77404	55258	48669	63945	270.845	270.987	231.833	243.351	258.643	276.713	260.763	266.469	714.047	690.829	576.318	597.055	683.741	692.075	669.005	675.652	2893.96	2700.74	2263.46	2458.39	2433.08	2709.11	2504.98	2794.97
RBFOX2	1	51964351..52040063	ENSGALG00000012540	348	302	309	242	410	293	274	322	7.20713	6.01269	7.19083	5.1029	6.80627	7.28939	7.29346	6.66629	19.0007	15.3282	17.8758	12.5198	17.9929	18.2312	18.7118	16.9029	15.5005	12.0619	14.1315	10.3764	12.8878	14.3648	14.1027	14.0743
MB	1	52054483..52058197	ENSGALG00000012541	3	2	0	0	2	0	3	2	0.109368	0.0700937	0	0	0.0584443	0	0.140569	0.0728861	0.288335	0.17869	0	0	0.154502	0	0.36064	0.184809	0.133625	0.07988	0	0	0.0628671	0	0.154409	0.0874179
RASD2	1	complement(52085845..52093273)	ENSGALG00000012542	41	85	82	104	90	50	60	54	0.533535	1.06335	1.19903	1.37794	0.938781	0.781609	1.00353	0.702455	1.4066	2.71081	2.9807	3.38075	2.48174	1.95485	2.57462	1.78113	1.82621	3.3949	3.7501	4.45928	2.82902	2.45133	3.08818	2.36028
MCM5	1	complement(52144221..52165309)	ENSGALG00000012546	945	922	674	735	899	609	573	672	10.4094	9.76343	8.34238	8.24324	7.9377	8.05842	8.11236	7.39958	27.4429	24.89	20.7385	20.2246	20.9839	20.1546	20.8128	18.7622	42.0918	36.8247	30.824	31.5151	28.2588	29.8572	29.4921	29.3724
HMOX1	1	complement(52153748..52159902)	ENSGALG00000012550	2076	1859	1244	2020	2731	1348	915	1559	38.0313	32.7395	25.6078	37.6776	40.1031	29.665	21.5444	28.5499	100.265	83.4631	63.6589	92.4412	106.016	74.1938	55.2736	72.3907	92.4684	74.2485	56.8918	86.613	85.845	66.0879	47.0948	68.1423
TOM1	1	complement(52167132..52187809)	ENSGALG00000012552	1491	2056	1196	2064	2222	1825	1350	1960	13.1419	17.4214	11.8454	18.5229	15.6988	19.3234	15.2938	17.2696	34.6469	44.4125	29.4467	45.4455	41.501	48.329	39.2371	43.7884	66.4115	82.1166	54.6966	88.4996	69.8453	89.4736	69.4841	85.6696
ENSGALG00000044768	1	complement(52189765..52194504)	ENSGALG00000044768	54	125	91	84	132	95	73	82	2.66814	5.9375	5.05235	4.22583	5.22795	5.63869	4.63594	4.05018	7.0342	15.1365	12.5597	10.368	13.8205	14.1027	11.8938	10.2695	2.40525	4.9925	4.1617	3.60173	4.14923	4.65753	3.75729	3.58413
ENSGALG00000012556	1	complement(52195547..52202256)	ENSGALG00000012556	129	181	167	146	255	145	137	123	2.04727	2.76148	2.97809	2.35915	3.2439	2.76435	2.79451	1.95135	5.39735	7.03987	7.4033	5.78812	8.57548	6.91379	7.16948	4.9478	5.74587	7.22914	7.6374	6.26015	8.01555	7.10886	7.05135	5.3762
ISX	1	complement(52290943..52316261)	ENSGALG00000012557	572	715	555	680	775	682	488	602	18.1951	21.8648	19.8376	22.0235	19.7608	26.0606	19.9517	19.1426	47.9691	55.74	49.3148	54.0342	52.239	65.179	51.1873	48.5376	25.4778	28.5571	25.3818	29.1568	24.361	33.4362	25.1172	26.3128
ENSGALG00000045417	1	52551375..52552469	ENSGALG00000045417	1	0	0	0	0	0	0	0	0.0266679	0	0	0	0	0	0	0	0.0703063	0	0	0	0	0	0	0	0.0445416	0	0	0	0	0	0	0
LARGE1	1	52729204..53004111	ENSGALG00000012559	241	297	206	222	353	268	223	316	2.88423	3.41702	2.77024	2.7051	3.38633	3.8529	3.43018	3.78046	7.60389	8.71104	6.88659	6.63691	8.95202	9.63631	8.80035	9.58566	10.7345	11.8622	9.42098	9.51885	11.096	13.1391	11.4777	13.812
ENSGALG00000033589	1	53072029..53138810	ENSGALG00000033589	5	5	0	5	2	0	3	8	0.109041	0.104826	0	0.111022	0.0349618	0	0.0840897	0.174404	0.287474	0.267235	0	0.272391	0.0924242	0	0.215737	0.442216	0.222708	0.1997	0	0.214389	0.0628671	0	0.154409	0.349672
TIMP3	1	complement(53145365..53177923)	ENSGALG00000028627	1285	1324	1055	1263	2137	1210	953	1256	38.4464	38.082	35.4685	38.4746	51.2507	43.4889	36.6476	37.5653	101.359	97.0827	88.1717	94.3966	135.485	108.768	94.0217	95.2499	57.236	52.8806	48.2482	54.1546	67.1735	59.3222	49.0506	54.8984
ENSGALG00000037302	1	53250376..53269985	ENSGALG00000037302	6	4	3	4	7	3	2	2	0.297973	0.190969	0.167411	0.202257	0.278654	0.178973	0.12766	0.0992888	0.785566	0.48684	0.41617	0.496233	0.736643	0.44762	0.32752	0.251755	0.26725	0.15976	0.137199	0.171511	0.220035	0.14708	0.102939	0.0874179
FBXO7	1	complement(53278103..53291713)	ENSGALG00000012569	962	1175	993	1046	1660	963	923	1082	9.18628	10.7865	10.6549	10.1699	12.7062	11.0467	11.3283	10.3285	24.2184	27.4982	26.4874	24.9515	33.5897	27.6283	29.0636	26.1887	42.849	46.9295	45.4128	44.8501	52.1797	47.2127	47.5065	47.2931
ENSGALG00000045260	1	53297931..53316570	ENSGALG00000045260	0	0	0	0	0	0	0	0	0	0	0	0	0	0	0	0	0	0	0	0	0	0	0	0	0	0	0	0	0	0	0	0
ENSGALG00000039479	1	53322790..53335591	ENSGALG00000039479	0	0	0	2	1	0	0	0	0	0	0	0.0424436	0.0167073	0	0	0	0	0	0	0.104134	0.044167	0	0	0	0	0	0	0.0857554	0.0314335	0	0	0
ENSGALG00000012611	1	53336921..53349590	ENSGALG00000012611	4545	4689	3355	5204	5733	3980	3573	4780	52.2314	51.8032	43.3239	60.891	52.8107	54.9441	52.7753	54.9124	137.701	132.062	107.7	149.395	139.609	137.418	135.398	139.235	202.442	187.279	153.434	223.136	180.208	195.126	183.901	208.929
ENSGALG00000019304	1	complement(53368976..53369485)	ENSGALG00000019304	3	1	2	4	3	0	1	1	0.183656	0.0588522	0.137579	0.249323	0.147213	0	0.0786835	0.0611969	0.484185	0.150032	0.34201	0.611708	0.38917	0	0.201868	0.15517	0.133625	0.03994	0.0914659	0.171511	0.0943006	0	0.0514697	0.043709
ENSGALG00000012619	1	53375666..53392366	ENSGALG00000012619	1244	1266	858	1044	1455	966	861	1297	13.9395	13.6377	10.8032	11.911	13.0687	13.003	12.4003	14.5282	36.7498	34.7667	26.8559	29.2233	34.5481	32.5214	31.8137	36.8375	55.4098	50.564	39.2389	44.7643	45.7358	47.3597	44.3154	56.6905
PWP1	1	complement(53393745..53408107)	ENSGALG00000012631	1945	2092	1640	2266	2380	1799	1324	1828	19.9007	20.5773	18.8551	23.6062	19.5195	22.1116	17.4115	18.6969	52.4656	52.4579	46.8723	57.9173	51.6011	55.3023	44.6703	47.4075	86.6334	83.5545	75.002	97.1609	74.8118	88.1989	68.1459	79.9
BTBD11	1	complement(53427816..53497435)	ENSGALG00000039595	385	339	355	360	603	357	276	279	5.16185	4.36941	5.34823	4.91434	6.48043	5.7498	4.75613	3.73933	13.6085	11.139	13.2953	12.0572	17.1315	14.3806	12.2021	9.48137	17.1485	13.5397	16.2352	15.436	18.9544	17.5025	14.2056	12.1948
ENSGALG00000038647	1	complement(53594487..53595476)	ENSGALG00000038647	38	25	27	28	35	14	20	23	1.37503	0.869657	1.09782	1.03159	1.01517	0.608551	0.930162	0.831959	3.62509	2.21702	2.72908	2.53097	2.68368	1.52202	2.38639	2.1095	1.69258	0.9985	1.23479	1.20058	1.10017	0.686373	1.02939	1.00531
CRY1	1	complement(53642388..53676704)	ENSGALG00000012638	2976	3873	2369	5175	6361	3286	2594	2637	43.4515	54.3624	38.8664	76.9309	74.4458	57.6342	48.6791	38.4882	114.554	138.587	96.6189	188.748	196.803	144.146	124.889	97.5899	132.556	154.688	108.341	221.892	199.949	161.102	133.512	115.261
MTERF2	1	53679123..53683274	ENSGALG00000012639	193	209	185	175	322	176	139	168	4.36888	4.54818	4.70567	4.03338	5.84266	4.78592	4.04415	3.80161	11.518	11.5947	11.6979	9.8958	15.4455	11.9699	10.3755	9.63928	8.59653	8.34746	8.46059	7.5036	10.1216	8.62869	7.15429	7.3431
TMEM263	1	complement(53686093..53698882)	ENSGALG00000012640	2066	2385	1953	2205	2586	1735	1598	2063	20.6397	22.9056	21.9237	22.4285	20.7083	20.8216	20.5187	20.6024	54.4139	58.3933	54.5005	55.0278	54.7439	52.0759	52.6421	52.2391	92.0229	95.2569	89.3164	94.5454	81.2871	85.0612	82.2485	90.1716
RIC8B	1	complement(53725544..53757828)	ENSGALG00000029484	4204	3970	3814	3613	4419	3390	3591	4437	72.5545	65.8675	73.9639	63.4875	61.132	70.2816	79.6558	76.5485	191.281	167.917	183.868	155.765	161.607	175.778	204.362	194.095	187.253	158.562	174.425	154.917	138.905	166.2	184.828	193.937
RFX4	1	complement(53763373..53853263)	ENSGALG00000012647	35	26	9	22	43	31	24	16	0.447677	0.319705	0.129353	0.286508	0.440867	0.476319	0.394555	0.204579	1.18024	0.815025	0.321561	0.702942	1.16546	1.1913	1.01226	0.518727	1.55896	1.03844	0.411596	0.94331	1.35164	1.51983	1.23527	0.699343
POLR3B	1	complement(53861738..53929245)	ENSGALG00000012655	561	668	582	574	792	538	566	546	4.24733	4.86192	4.95123	4.42469	4.8064	4.893	5.50769	4.13229	11.1975	12.3945	12.3084	10.8559	12.7061	12.2377	14.1303	10.4777	24.9878	26.6799	26.6166	24.6118	24.8954	26.3763	29.1318	23.8651
TCP11L2	1	complement(53931857..53948202)	ENSGALG00000012658	1430	1874	1712	2389	3427	1994	2092	2309	9.79542	12.3406	13.1773	16.6618	18.8167	16.4079	18.4183	15.8109	25.8243	31.4599	32.7578	40.8793	49.7433	41.037	47.2532	40.0898	63.6945	74.8476	78.2948	102.435	107.723	97.7591	107.675	100.924
CKAP4	1	53949473..53959022	ENSGALG00000012659	634	749	759	662	962	478	757	605	12.3424	14.0175	16.6031	13.1216	15.0117	11.1784	18.9412	11.7737	32.5392	35.735	41.2741	32.1936	39.6844	27.9578	48.5948	29.8531	28.2394	29.9151	34.7113	28.385	30.2391	23.4347	38.9625	26.4439
NUAK1	1	53983409..54028357	ENSGALG00000012662	101	98	90	69	137	64	125	89	1.45431	1.35656	1.45618	1.01158	1.58124	1.10702	2.31337	1.28106	3.83409	3.45829	3.61994	2.4819	4.18012	2.76871	5.93509	3.24823	4.4987	3.91412	4.11596	2.95856	4.30639	3.13771	6.43371	3.8901
C12orf75	1	complement(54229629..54246246)	ENSGALG00000026311	91	109	90	134	195	104	235	74	2.12926	2.45185	2.36629	3.19235	3.65733	2.92322	7.06733	1.73087	5.61352	6.25051	5.8824	7.83236	9.66843	7.31113	18.1317	4.38876	4.05329	4.35346	4.11596	5.74561	6.12954	5.09877	12.0954	3.23446
APPL2	1	54262171..54293903	ENSGALG00000027122	868	1216	926	963	1551	899	792	1057	12.8208	17.2667	15.3689	14.4824	18.3633	15.9513	15.0356	15.6069	33.8004	44.018	38.206	35.5322	48.5446	39.895	38.5748	39.5725	38.6621	48.567	42.3487	41.2912	48.7534	44.075	40.764	46.2004
WASHC4	1	complement(54298419..54334354)	ENSGALG00000028254	1008	913	699	902	1083	661	740	902	8.3385	7.26068	6.49744	7.59718	7.18122	6.56855	7.86791	7.45898	21.9834	18.5097	16.1521	18.6395	18.9841	16.4283	20.1856	18.9128	44.8979	36.4652	31.9673	38.6757	34.0425	32.4066	38.0876	39.4255
ALDH1L2	1	54341803..54369311	ENSGALG00000012691	182	229	219	196	217	161	175	140	1.83834	2.22366	2.48563	2.01571	1.75694	1.95353	2.27192	1.4136	4.84654	5.6688	6.17907	4.9455	4.64459	4.88589	5.82874	3.5843	8.10657	9.14626	10.0155	8.40403	6.82108	7.89329	9.00719	6.11925
C12orf45	1	complement(54370469..54374950)	ENSGALG00000012694	473	576	491	564	698	418	463	478	8.8032	10.3058	10.2683	10.6875	10.413	9.34535	11.0754	8.89309	23.2085	26.2726	25.5262	26.2216	27.5276	23.3733	28.4147	22.5491	21.0682	23.0054	22.4549	24.183	21.9406	20.4931	23.8305	20.8929
SLC41A2	1	54375641..54424697	ENSGALG00000012697	1931	2034	1736	1766	2269	1647	1523	1974	14.5367	14.7202	14.6849	13.536	13.6918	14.8942	14.7361	14.8551	38.324	37.5262	36.5054	33.2104	36.1952	37.2512	37.8064	37.6662	86.0098	81.238	79.3924	75.722	71.3227	80.7469	78.3883	86.2815
ENSGALG00000037187	1	54434097..54434375	ENSGALG00000037187	5	15	14	20	20	6	44	8	0.523321	1.50928	1.64651	2.13131	1.67792	0.754379	5.91903	0.837015	1.37967	3.84761	4.09308	5.22912	4.4357	1.88674	15.1857	2.12232	0.222708	0.5991	0.640261	0.857554	0.628671	0.29416	2.26467	0.349672
CHST11	1	complement(54437824..54592561)	ENSGALG00000030607	162	204	242	164	303	148	782	189	3.55151	4.29939	5.96143	3.66067	5.32455	3.89762	22.0346	4.14195	9.36309	10.9605	14.8197	8.98136	14.0758	9.74818	56.5311	10.5023	7.21574	8.14776	11.0674	7.03195	9.52436	7.25594	40.2493	8.26099
TXNRD1	1	complement(54632776..54671332)	ENSGALG00000035345	3189	3757	3745	3699	4333	2904	2638	3571	28.1423	31.8732	37.136	33.236	30.6504	30.7852	29.9213	31.5022	74.1936	81.2546	92.317	81.5437	81.0267	76.9956	76.7649	79.8763	142.043	150.055	171.27	158.605	136.202	142.373	135.777	156.085
NFYB	1	54682343..54696856	ENSGALG00000041193	850	929	840	915	1189	829	759	827	13.9995	14.7092	15.5457	15.3438	15.697	16.4017	16.067	13.6158	36.9079	37.4982	38.6454	37.6457	41.4963	41.0215	41.2209	34.524	37.8604	37.1043	38.4157	39.2331	37.3745	40.6431	39.0655	36.1473
HCFC2	1	complement(54701770..54724511)	ENSGALG00000029616	941	1145	1042	923	1589	970	932	1169	6.6357	7.76214	8.25662	6.627	8.9818	8.21692	8.4472	8.24056	17.4942	19.7881	20.5253	16.2592	23.744	20.551	21.6718	20.8946	41.9136	45.7313	47.6537	39.5761	49.9479	47.5558	47.9697	51.0958
GLT8D2	1	54727513..54743775	ENSGALG00000034078	45	49	61	32	45	15	122	21	0.597843	0.62582	0.91063	0.432855	0.479214	0.23939	2.08322	0.278894	1.57614	1.59541	2.26375	1.062	1.26684	0.598728	5.34462	0.707158	2.00437	1.95706	2.78971	1.37209	1.41451	0.7354	6.2793	0.917888
TDG	1	complement(54743480..54753986)	ENSGALG00000031457	1040	1130	976	1046	1131	789	813	980	9.49933	9.92241	10.0172	9.72769	8.28065	8.65719	9.54444	8.9481	25.0437	25.2953	24.902	23.8667	21.8905	21.6521	24.4868	22.6886	46.3233	45.1322	44.6353	44.8501	35.5513	38.682	41.8448	42.8348
C1H12ORF73	1	54754183..54755465	ENSGALG00000030933	403	551	464	524	629	512	365	498	11.3482	14.9161	14.6818	15.0236	14.1977	17.3194	13.2104	14.0184	29.9182	38.0256	36.4977	36.86	37.5325	43.3169	33.8921	35.5448	17.9503	22.0069	21.2201	22.4679	19.7717	25.1016	18.7864	21.7671
HSP90B1	1	complement(54759459..54769305)	ENSGALG00000033789	15267	18840	16645	18625	17346	12445	12807	13255	163.183	193.589	199.914	202.692	148.615	159.793	175.942	141.627	430.211	493.519	496.97	497.3	392.875	399.65	451.39	359.107	680.017	752.47	761.225	798.597	545.246	610.137	659.172	579.362
NT5DC3	1	54798750..54818100	ENSGALG00000029746	136	164	97	129	156	87	127	130	2.38378	2.76344	1.91045	2.30216	2.19177	1.83184	2.86109	2.2778	6.28453	7.04486	4.74923	5.64829	5.7941	4.58153	7.3403	5.77555	6.05766	6.55016	4.43609	5.53123	4.90363	4.26532	6.53665	5.68216
ENSGALG00000039245	1	complement(54826433..54835321)	ENSGALG00000039245	10	17	10	7	13	12	14	11	0.148834	0.243238	0.16724	0.106077	0.155092	0.214548	0.267813	0.163659	0.392382	0.620088	0.415746	0.260257	0.409997	0.536597	0.687091	0.414972	0.445416	0.67898	0.457329	0.300144	0.408636	0.58832	0.720575	0.480799
ENSGALG00000041360	1	complement(54838907..54845451)	ENSGALG00000041360	2	2	3	4	3	1	3	2	0.0678311	0.0652091	0.114329	0.138127	0.0815573	0.0407417	0.130774	0.067807	0.178828	0.166238	0.284214	0.338891	0.215603	0.101897	0.335508	0.17193	0.0890832	0.07988	0.137199	0.171511	0.0943006	0.0490266	0.154409	0.0874179
ENSGALG00000029824	1	complement(54863006..54871746)	ENSGALG00000029824	1	0	1	0	2	3	2	3	0.0308031	0	0.0346124	0	0.0493817	0.111008	0.0791815	0.0923763	0.0812083	0	0.0860436	0	0.130544	0.277638	0.203145	0.234227	0.0445416	0	0.0457329	0	0.0628671	0.14708	0.102939	0.131127
ASCL1	1	complement(55116728..55118741)	ENSGALG00000037082	101	133	85	96	153	83	97	94	1.5531	1.96611	1.4687	1.50303	1.88587	1.53319	1.91712	1.44494	4.09454	5.01222	3.65108	3.68764	4.98543	3.83459	4.91849	3.66377	4.4987	5.31202	3.8873	4.11626	4.80933	4.06921	4.99256	4.10864
PAH	1	55129804..55165880	ENSGALG00000012754	9	7	2	7	40	17	10	10	0.161432	0.120705	0.0403102	0.127839	0.575109	0.3663	0.230541	0.179305	0.425595	0.307714	0.100208	0.313651	1.52034	0.916137	0.591467	0.454643	0.400874	0.27958	0.0914659	0.300144	1.25734	0.833453	0.514697	0.43709
ENSGALG00000019300	1	55173105..55201560	ENSGALG00000019300	0	0	0	0	0	0	0	0	0	0	0	0	0	0	0	0	0	0	0	0	0	0	0	0	0	0	0	0	0	0	0	0
IGF-I	1	55335204..55383631	ENSGALG00000012755	29	8	14	10	15	11	14	27	1.06253	0.281782	0.576381	0.373046	0.440532	0.484147	0.659283	0.988901	2.80123	0.718349	1.43284	0.91526	1.16458	1.21088	1.69143	2.50744	1.29171	0.31952	0.640261	0.428777	0.471503	0.539293	0.720575	1.18014
PARPBP	1	complement(55424000..55472057)	ENSGALG00000012756	40	68	61	64	79	44	47	56	0.29114	0.475805	0.498894	0.474285	0.460904	0.384711	0.439683	0.40745	0.767552	1.21297	1.24021	1.16365	1.21843	0.962183	1.12803	1.03312	1.78166	2.71592	2.78971	2.74417	2.48325	2.15717	2.41907	2.4477
PMCH	1	55426369..55427757	ENSGALG00000012757	0	3	2	6	2	3	0	6	0	0.108949	0.0848966	0.230777	0.0605613	0.13614	0	0.226579	0	0.277744	0.211046	0.566206	0.160098	0.340493	0	0.574509	0	0.11982	0.0914659	0.257266	0.0628671	0.14708	0	0.262254
NUP37	1	55472091..55496235	ENSGALG00000012759	427	538	481	586	553	420	382	438	8.46501	10.2532	10.7147	11.8281	8.78754	10.002	9.73336	8.67998	22.3169	26.1386	26.636	29.02	23.2305	25.0157	24.9716	22.0088	19.0193	21.4877	21.9975	25.1263	17.3827	20.5912	19.6614	19.1445
ENSGALG00000012760	1	55504144..55518514	ENSGALG00000012760	437	607	537	501	684	414	440	496	8.87411	11.8498	12.2534	10.3586	11.1338	10.0991	11.4841	10.0686	23.3954	30.2088	30.4609	25.4145	29.4329	25.2585	29.4631	25.5298	19.4647	24.2436	24.5586	21.4817	21.5005	20.297	22.6467	21.6796
DRAM1	1	complement(55547853..55561586)	ENSGALG00000012761	222	237	180	278	321	195	226	241	8.57499	8.80051	7.81251	10.9331	9.93866	9.04806	11.2199	9.30557	22.6068	22.4352	19.4213	26.8241	26.2736	22.6297	28.7854	23.595	9.88824	9.46578	8.23193	11.92	10.0902	9.5602	11.6321	10.5339
GNPTAB	1	55573823..55614936	ENSGALG00000012763	5133	6020	4106	6831	8018	5934	5627	6691	26.6566	30.0545	23.9602	36.1191	33.3766	37.0188	37.5588	34.7353	70.2768	76.6182	59.5632	88.6174	88.2336	92.586	96.3593	88.074	228.632	240.439	187.779	292.898	252.034	290.924	289.62	292.457
SYCP3	1	55616634..55625686	ENSGALG00000012766	31	37	45	47	51	38	33	38	1.26254	1.44865	2.05936	1.94894	1.66493	1.85912	1.72742	1.54708	3.32852	3.69306	5.11941	4.78169	4.40136	4.64976	4.4318	3.92274	1.38079	1.47778	2.05798	2.01525	1.60311	1.86301	1.6985	1.66094
CHPT1	1	complement(55625668..55645260)	ENSGALG00000012769	523	754	606	552	880	478	633	486	4.54532	6.29961	5.91797	4.8845	6.13039	4.99035	7.07077	4.22226	11.9832	16.0596	14.7116	11.984	16.2061	12.4811	18.1405	10.7059	23.2953	30.1148	27.7142	23.6685	27.6615	23.4347	32.5803	21.2426
MYBPC1	1	complement(55652011..55723269)	ENSGALG00000012783	1	6	9	7	7	0	3	4	0.00761839	0.0439434	0.0770448	0.0542975	0.0427468	0	0.0293755	0.0304627	0.0200849	0.112025	0.191527	0.133218	0.113004	0	0.0753646	0.0772407	0.0445416	0.23964	0.411596	0.300144	0.220035	0	0.154409	0.174836
SPIC	1	complement(55757636..55763936)	ENSGALG00000027209	12	13	13	10	25	8	10	8	0.463513	0.482728	0.564236	0.393277	0.774039	0.371202	0.496456	0.308898	1.22199	1.23062	1.40265	0.964897	2.04623	0.928398	1.27369	0.783237	0.534499	0.51922	0.594528	0.428777	0.785838	0.392213	0.514697	0.349672
PARP12	1	55786716..55800554	ENSGALG00000046187	1306	1195	976	1223	1499	1142	972	1365	18.2386	16.0434	15.3156	17.3897	16.78	19.1582	17.4468	19.0558	48.0837	40.8994	38.0735	42.6653	44.3592	47.9157	44.7607	48.3174	58.1713	47.7283	44.6353	52.4394	47.1189	55.9884	50.0285	59.6627
TBXAS1	1	complement(55806774..56041222)	ENSGALG00000012791	131	122	154	128	203	87	134	149	2.23968	2.00518	2.95851	2.22814	2.78197	1.78679	2.94455	2.54651	5.90462	5.11182	7.35461	5.46669	7.35435	4.46887	7.55443	6.45689	5.83495	4.87268	7.04287	5.48835	6.38101	4.26532	6.89694	6.51263
HIPK2	1	56075644..56198466	ENSGALG00000012792	5761	5077	4086	4329	6760	4524	4252	5857	46.4592	39.3604	37.0262	35.5451	43.6981	43.8265	44.0724	47.2165	122.484	100.342	92.0442	87.2091	115.519	109.612	113.071	119.721	256.604	202.775	186.865	185.618	212.491	221.797	218.849	256.003
KIAA1549	1	56292882..56362827	ENSGALG00000012796	346	333	247	235	446	211	294	277	1.80777	1.6726	1.45012	1.25013	1.86786	1.32431	1.97431	1.44675	4.76596	4.26397	3.60487	3.06716	4.93784	3.31218	5.06522	3.66835	15.4114	13.3	11.296	10.0763	14.0194	10.3446	15.1321	12.1074
TMEM213	1	complement(56374719..56374886)	ENSGALG00000026974	1	0	1	0	1	2	0	0	0.173817	0	0.195313	0	0.139327	0.417603	0	0	0.458247	0	0.485532	0	0.368321	1.04445	0	0	0.0445416	0	0.0457329	0	0.0314335	0.0980533	0	0
ATP6V0A4	1	56383284..56408305	ENSGALG00000040666	3	5	3	3	6	4	6	4	0.0271893	0.0435638	0.0305517	0.0276832	0.0435883	0.0435489	0.0698921	0.0362395	0.071681	0.111058	0.0759491	0.0679201	0.115229	0.108918	0.179313	0.0918881	0.133625	0.1997	0.137199	0.128633	0.188601	0.196107	0.308818	0.174836
SVOPL	1	56415234..56432260	ENSGALG00000012812	1	0	0	0	0	0	3	1	0.0188639	0	0	0	0	0	0.0727365	0.0188572	0.0497322	0	0	0	0	0	0.18661	0.0478139	0.0445416	0	0	0	0	0	0.154409	0.043709
TRIM24	1	complement(56435003..56493091)	ENSGALG00000012823	311	367	359	274	573	296	305	302	2.18098	2.47421	2.82894	1.95641	3.22098	2.49358	2.74911	2.11711	5.74987	6.30752	7.03251	4.80001	8.51491	6.23659	7.053	5.36811	13.8524	14.658	16.4181	11.7485	18.0114	14.5119	15.6983	13.2001
AKR1D1	1	56606803..56640860	ENSGALG00000012834	412	142	78	257	318	63	165	298	9.10056	3.01535	1.93599	5.77993	5.63041	1.67167	4.68441	6.5801	23.9924	7.68706	4.81271	14.1809	14.8844	4.18095	12.0181	16.6844	18.3511	5.67148	3.56717	11.0196	9.99587	3.08868	8.4925	13.0253
ENSGALG00000034511	1	complement(56680591..56689353)	ENSGALG00000034511	653	611	516	644	583	420	360	537	14.874	13.3793	13.2069	14.9355	10.6445	11.4922	10.5394	12.2274	39.2133	34.108	32.8313	36.6438	28.1395	28.7427	27.0395	31.0035	29.0857	24.4033	23.5982	27.6132	18.3258	20.5912	18.5291	23.4717
ENSGALG00000012847	1	complement(56693093..56705912)	ENSGALG00000012847	26	37	20	15	25	34	13	15	0.532796	0.7289	0.460527	0.312966	0.410648	0.836963	0.342398	0.307273	1.40465	1.85819	1.14483	0.767855	1.08558	2.09329	0.878443	0.779114	1.15808	1.47778	0.914659	0.643166	0.785838	1.66691	0.669106	0.655634
KDM7A	1	complement(56754302..56787545)	ENSGALG00000035108	412	334	307	346	448	291	372	456	9.8292	7.66031	8.22994	8.40457	8.56725	8.33977	11.4068	10.875	25.9134	19.5285	20.459	20.6204	22.6481	20.8582	29.2649	27.5745	18.3511	13.34	14.04	14.8357	14.0822	14.2668	19.1467	19.9313
SLC37A3	1	complement(56807019..56827366)	ENSGALG00000012849	1471	1746	1286	1469	2082	1315	1186	1696	12.9695	14.7991	12.7406	13.1872	14.7141	13.9277	13.4399	14.948	34.1925	37.7275	31.6721	32.3545	38.8979	34.8338	34.481	37.9019	65.5207	69.7352	58.8125	62.9874	65.4446	64.47	61.043	74.1304
RAB19	1	56827540..56831694	ENSGALG00000012850	307	384	289	287	381	301	216	288	6.70015	8.05669	7.08731	6.37744	6.66521	7.89138	6.05899	6.28324	17.6641	20.539	17.6185	15.6469	17.62	19.7368	15.5447	15.9317	13.6743	15.337	13.2168	12.3059	11.9762	14.757	11.1175	12.5882
MKRN1	1	complement(56836124..56858052)	ENSGALG00000012852	5367	6754	5438	6580	8518	6271	4990	6432	54.8944	66.4104	62.4989	68.5236	69.8355	77.0501	65.5989	65.7639	144.722	169.301	155.367	168.121	184.615	192.707	168.298	166.75	239.055	269.755	248.696	282.135	267.751	307.446	256.834	281.136
ENSGALG00000037671	1	56862364..56885474	ENSGALG00000037671	6	1	2	2	4	8	4	6	0.0763433	0.012232	0.0285948	0.02591	0.0407964	0.122278	0.0654153	0.0763161	0.201269	0.0311832	0.0710844	0.0635697	0.107848	0.305825	0.167827	0.193506	0.26725	0.03994	0.0914659	0.0857554	0.125734	0.392213	0.205879	0.262254
DENND2A	1	complement(56889138..56945866)	ENSGALG00000012857	333	407	316	356	533	241	397	255	2.79426	3.28319	2.97953	3.04152	3.58503	2.42929	4.28167	2.13899	7.36671	8.36987	7.40687	7.46231	9.47729	6.0758	10.9849	5.42358	14.8324	16.2556	14.4516	15.2645	16.7541	11.8154	20.4335	11.1458
ADCK2	1	56947561..56957857	ENSGALG00000012863	140	240	141	202	257	136	175	147	2.17341	3.58182	2.45963	3.19288	3.19808	2.53625	3.49182	2.28127	5.72991	9.13116	6.11445	7.83367	8.45435	6.34331	8.95848	5.78433	6.23582	9.5856	6.44834	8.6613	8.07842	6.66762	9.00719	6.42522
NDUFB2	1	56974471..56975259	ENSGALG00000032595	2001	2855	2053	2707	2189	2418	1943	2861	82.5308	113.202	95.147	113.678	72.3698	119.802	103.001	117.959	217.582	288.587	236.528	278.906	191.315	299.633	264.256	299.095	89.1277	114.029	93.8897	116.07	68.808	118.546	100.006	125.051
BRAF	1	complement(56983387..57058584)	ENSGALG00000012865	326	259	203	220	267	219	202	255	3.26238	2.4917	2.28271	2.2416	2.14176	2.6327	2.59818	2.55095	8.60084	6.35211	5.67463	5.49971	5.6619	6.58453	6.66578	6.46815	14.5206	10.3445	9.28378	9.4331	8.39276	10.7368	10.3969	11.1458
MRPS33	1	complement(57070626..57075823)	ENSGALG00000028879	624	792	738	817	926	594	574	732	18.824	22.9684	25.0162	25.0938	22.3914	21.5255	22.2556	22.0741	49.627	58.5536	62.1882	61.5672	59.1932	53.8365	57.0981	55.9707	27.794	31.6325	33.7509	35.0311	29.1075	29.1218	29.5436	31.995
ENSGALG00000045120	1	complement(57076215..57077351)	ENSGALG00000045120	0	1	0	1	3	0	0	0	0	0.02469	0	0.0261493	0.0617597	0	0	0	0	0.0629424	0	0.0641567	0.163266	0	0	0	0	0.03994	0	0.0428777	0.0943006	0	0	0
TMEM178B	1	57091544..57302451	ENSGALG00000028444	31	20	24	35	22	13	22	22	0.64247	0.398474	0.558907	0.738546	0.365474	0.323649	0.586022	0.455784	1.69379	1.01583	1.3894	1.81201	0.966157	0.809465	1.50348	1.15568	1.38079	0.7988	1.09759	1.50072	0.691538	0.637346	1.13233	0.961597
ENSGALG00000046291	1	complement(57227117..57228229)	ENSGALG00000046291	1	1	0	0	3	2	0	2	0.0262366	0.0252224	0	0	0.0630915	0.0630344	0	0.0524544	0.0691693	0.0642996	0	0	0.166787	0.157652	0	0.133002	0.0445416	0.03994	0	0	0.0943006	0.0980533	0	0.0874179
ENSGALG00000045859	1	complement(57323243..57324379)	ENSGALG00000045859	1	2	1	0	0	2	0	2	0.0256828	0.04938	0.0288589	0	0	0.0617038	0	0.0513472	0.0677093	0.125885	0.0717408	0	0	0.154325	0	0.130195	0.0445416	0.07988	0.0457329	0	0	0.0980533	0	0.0874179
AGK	1	57332274..57363591	ENSGALG00000012870	480	529	408	493	662	414	427	478	7.66355	8.11939	7.31958	8.01408	8.47206	7.94016	8.76227	7.6289	20.2039	20.6988	18.1959	19.6624	22.3965	19.8588	22.4801	19.3437	21.38	21.1283	18.659	21.1387	20.809	20.297	21.9776	20.8929
KIAA1147	1	complement(57369059..57379716)	ENSGALG00000012874	914	846	620	767	953	658	577	886	14.2804	12.707	10.8848	12.2013	11.9352	12.3498	11.5869	13.838	37.6483	32.394	27.0588	29.9356	31.5515	30.8875	29.727	35.0872	40.711	33.7892	28.3544	32.8872	29.9562	32.2595	29.698	38.7261
WEE2	1	57382693..57393808	ENSGALG00000012875	2	0	5	12	5	1	2	2	0.0340739	0	0.0957191	0.208157	0.0682816	0.0204659	0.0437947	0.0340617	0.0898313	0	0.23795	0.510708	0.180508	0.0511865	0.112358	0.0863663	0.0890832	0	0.228665	0.514533	0.157168	0.0490266	0.102939	0.0874179
SSBP1	1	57395053..57400622	ENSGALG00000012876	759	895	674	677	1197	763	614	820	32.3559	36.6787	32.2856	29.3845	40.9024	39.073	33.6419	34.9439	85.3021	93.5053	80.2594	72.0943	108.128	97.7237	86.3103	88.6029	33.8071	35.7463	30.824	29.0282	37.6259	37.4073	31.6024	35.8413
CREB3L2	1	57408100..57480365	ENSGALG00000012877	945	787	722	622	1076	628	685	1003	17.2578	13.8168	14.8159	11.5654	15.751	13.777	16.0785	18.3105	45.498	35.2233	36.8312	28.3756	41.639	34.457	41.2503	46.4277	42.0918	31.4328	33.0192	26.6699	33.8225	30.7887	35.2567	43.8401
DGKI	1	57491613..57698081	ENSGALG00000012890	3	1	1	4	5	0	3	4	0.0278638	0.00892892	0.0104366	0.0378267	0.0372248	0	0.035813	0.0371386	0.0734594	0.0227626	0.0259444	0.0928069	0.0984065	0	0.0918806	0.0941678	0.133625	0.03994	0.0457329	0.171511	0.157168	0	0.154409	0.174836
PTN	1	57724423..57794404	ENSGALG00000040493	851	958	916	1230	1697	696	937	837	3.61301	3.91007	4.36991	5.31696	5.77516	3.54968	5.11305	3.55231	9.52524	9.96797	10.8633	13.045	15.2671	8.87796	13.1178	9.00717	37.9049	38.2625	41.8914	52.7396	53.3427	34.1225	48.2271	36.5844
CHRM2	1	complement(57864325..57865725)	ENSGALG00000012894	77	150	158	118	223	81	107	108	1.60493	3.00562	3.70048	2.50417	3.72573	2.0281	2.86647	2.25026	4.23118	7.66226	9.19911	6.14393	9.84924	5.07239	7.35412	5.70572	3.4297	5.991	7.2258	5.05957	7.00968	3.97116	5.50726	4.72057
MTPN	1	58262001..58299769	ENSGALG00000041619	8196	11015	9011	9561	12468	7825	7366	9950	62.6365	80.9261	77.3812	74.3955	76.3773	71.8373	72.3531	76.014	165.133	206.306	192.364	182.528	201.909	179.669	185.626	192.74	365.063	439.939	412.099	409.954	391.913	383.634	379.126	434.904
FAM180A	1	58388267..58415575	ENSGALG00000028459	0	3	4	3	8	2	2	5	0	0.121702	0.189668	0.128895	0.2706	0.101383	0.108474	0.210917	0	0.310255	0.471499	0.316241	0.715352	0.253565	0.278297	0.534797	0	0.11982	0.182932	0.128633	0.251468	0.0980533	0.102939	0.218545
SLC13A4	1	58420521..58447259	ENSGALG00000012908	0	0	0	0	0	0	1	0	0	0	0	0	0	0	0.0212045	0	0	0	0	0	0	0	0.0544016	0	0	0	0	0	0	0	0.0514697	0
C7orf73	1	complement(58456261..58462431)	ENSGALG00000036355	674	699	518	937	871	409	643	644	32.0549	31.9588	27.6822	45.3724	33.2043	23.3667	39.3047	30.6172	84.5084	81.4728	68.8158	111.32	87.778	58.4414	100.839	77.6323	30.021	27.9181	23.6897	40.1764	27.3786	20.0519	33.095	28.1486
SYT10	1	58696926..58729393	ENSGALG00000012911	7	11	11	14	29	17	10	4	0.0955629	0.144365	0.168741	0.194598	0.317345	0.278792	0.175465	0.0545879	0.251939	0.368032	0.419478	0.477441	0.838925	0.697275	0.450168	0.138412	0.311791	0.43934	0.503062	0.600288	0.911573	0.833453	0.514697	0.174836
PKP2	1	58878156..58920195	ENSGALG00000012913	4252	4051	2857	3744	4488	3115	3014	4233	42.061	38.5236	31.7566	37.7086	35.5862	37.0155	38.3203	41.8581	110.888	98.2086	78.9443	92.5171	94.0747	92.578	98.3132	106.135	189.391	161.797	130.659	160.534	141.074	152.718	155.13	185.02
ENSGALG00000012919	1	58962612..58965850	ENSGALG00000012919	350	403	298	422	462	302	259	325	10.7245	11.8712	10.2604	13.1656	11.3473	11.1162	10.2002	9.95492	28.2738	30.2633	25.5065	32.3015	29.9975	27.8023	26.1693	25.2415	15.5896	16.0958	13.6284	18.0944	14.5223	14.806	13.3306	14.2054
DNM1L	1	complement(58971662..59006582)	ENSGALG00000012929	2642	2914	2791	2899	3254	2081	2075	2634	25.3949	26.9267	30.1447	28.3714	25.0712	24.0285	25.635	25.309	66.9505	68.6444	74.9374	69.6086	66.2775	60.0967	65.7681	64.1731	117.679	116.385	127.641	124.303	102.285	102.024	106.8	115.129
FGD4	1	complement(59021804..59039816)	ENSGALG00000012932	515	460	431	399	548	444	417	553	7.72402	6.63244	7.26358	6.09295	6.58809	7.99944	8.03845	8.291	20.3634	16.9081	18.0567	14.9489	17.4161	20.007	20.6232	21.0225	22.9389	18.3724	19.7109	17.1082	17.2256	21.7678	21.4629	24.1711
BICD1	1	complement(59164015..59224210)	ENSGALG00000012934	53	78	41	34	47	29	45	34	0.67791	0.959114	0.589274	0.442786	0.481877	0.445589	0.739791	0.434731	1.78722	2.44508	1.46489	1.08636	1.27388	1.11444	1.89798	1.1023	2.3607	3.11532	1.87505	1.45784	1.47738	1.42177	2.31614	1.4861
ENSGALG00000045031	1	59237872..59238879	ENSGALG00000045031	1	0	0	0	0	0	0	0	0.0289696	0	0	0	0	0	0	0	0.0763744	0	0	0	0	0	0	0	0.0445416	0	0	0	0	0	0	0
ENSGALG00000044524	1	59241726..59242732	ENSGALG00000044524	0	0	2	0	0	0	0	0	0	0	0.0651689	0	0	0	0	0	0	0	0.162005	0	0	0	0	0	0	0	0.0914659	0	0	0	0	0
ENSGALG00000044624	1	59245579..59246586	ENSGALG00000044624	0	0	0	0	0	0	0	0	0	0	0	0	0	0	0	0	0	0	0	0	0	0	0	0	0	0	0	0	0	0	0	0
ENSGALG00000044959	1	59249433..59250440	ENSGALG00000044959	0	0	0	0	0	0	0	0	0	0	0	0	0	0	0	0	0	0	0	0	0	0	0	0	0	0	0	0	0	0	0	0
ENSGALG00000046239	1	59253286..59254293	ENSGALG00000046239	0	0	0	0	0	0	0	0	0	0	0	0	0	0	0	0	0	0	0	0	0	0	0	0	0	0	0	0	0	0	0	0
ENSGALG00000045433	1	59257140..59258147	ENSGALG00000045433	1	0	1	0	0	0	0	0	0.0289696	0	0.0325521	0	0	0	0	0	0.0763744	0	0.0809219	0	0	0	0	0	0.0445416	0	0.0457329	0	0	0	0	0
ENSGALG00000032522	1	complement(59339115..59339510)	ENSGALG00000032522	1	5	1	1	1	4	4	3	0.0737407	0.354451	0.0828599	0.0750802	0.0591084	0.354329	0.379112	0.221143	0.194408	0.903605	0.205983	0.184208	0.156258	0.886198	0.972635	0.560726	0.0445416	0.1997	0.0457329	0.0428777	0.0314335	0.196107	0.205879	0.131127
ENSGALG00000045168	1	complement(59380189..59387463)	ENSGALG00000045168	905	1500	1183	1199	1657	1164	968	1135	4.48907	7.15284	6.59372	6.05544	6.5883	6.93588	6.1714	5.62794	11.8349	18.2348	16.3915	14.8569	17.4166	17.347	15.8331	14.2701	40.3101	59.91	54.1021	51.4104	52.0854	57.067	49.8226	49.6097
AMN1	1	59452519..59473212	ENSGALG00000012938	200	242	161	198	224	160	133	154	6.46762	7.52331	5.85029	6.51926	5.80637	6.21548	5.52798	4.97829	17.051	19.1792	14.5434	15.9948	15.3496	15.5453	14.1824	12.6229	8.90832	9.66548	7.363	8.48979	7.04111	7.84426	6.84547	6.73118
ETFBKMT	1	complement(59476229..59483268)	ENSGALG00000027056	195	209	108	177	172	88	103	128	4.41758	4.55171	2.74923	4.08264	3.12335	2.39482	2.99907	2.89871	11.6464	11.6037	6.83436	10.0167	8.2568	5.98957	7.6943	7.34991	8.68561	8.34746	4.93916	7.58936	5.40657	4.31435	5.30138	5.59475
ENSGALG00000012944	1	59494161..59590192	ENSGALG00000012944	565	485	307	371	639	359	333	559	3.86568	3.19006	2.36023	2.58446	3.50446	2.95061	2.92834	3.82327	10.1914	8.13244	5.86733	6.34092	9.2643	7.37965	7.51285	9.69421	25.166	19.3709	14.04	15.9076	20.086	17.6006	17.1394	24.4333
ENSGALG00000045990	1	59589618..59600544	ENSGALG00000045990	427	429	274	273	511	351	226	450	9.896	9.55802	7.13542	6.44188	9.49282	9.7719	6.73194	10.4253	26.0895	24.3663	17.7381	15.805	25.095	24.4401	17.2712	26.4342	19.0193	17.1343	12.5308	11.7056	16.0625	17.2084	11.6321	19.669
SINHCAF	1	59618210..59633491	ENSGALG00000012946	636	718	627	601	1035	510	507	577	6.05544	6.57192	6.708	5.82614	7.89898	5.83309	6.20435	5.49173	15.9644	16.7538	16.6756	14.2943	20.8815	14.5889	15.9177	13.9247	28.3285	28.6769	28.6745	25.7695	32.5337	25.0036	26.0951	25.2201
ENSGALG00000030026	1	59653910..59659868	ENSGALG00000030026	7	4	7	12	15	6	6	10	0.540765	0.297064	0.607639	0.943865	0.928847	0.556803	0.595747	0.772246	1.42566	0.757307	1.51054	2.31575	2.45548	1.3926	1.52843	1.95809	0.311791	0.15976	0.320131	0.514533	0.471503	0.29416	0.308818	0.43709
ENSGALG00000012947	1	59669212..59682477	ENSGALG00000012947	52	66	48	105	114	76	52	82	1.05449	1.28666	1.09375	2.16794	1.85305	1.85137	1.35532	1.66226	2.78003	3.28008	2.71898	5.31899	4.89867	4.63038	3.47717	4.21479	2.31616	2.63604	2.19518	4.50216	3.58342	3.72603	2.67642	3.58413
IPO8	1	59686745..59727927	ENSGALG00000012953	950	843	806	738	1068	643	678	873	8.89998	7.59228	8.48473	7.03947	8.02009	7.2363	8.16385	8.1757	23.4636	19.3551	21.0924	17.2712	21.2017	18.0984	20.9449	20.7301	42.3145	33.6694	36.8607	31.6438	33.571	31.5241	34.8964	38.1579
TMTC1	1	59777130..59917023	ENSGALG00000012956	365	278	312	277	497	220	302	269	4.16998	3.05327	4.00528	3.2221	4.55135	3.01929	4.43454	3.07213	10.9936	7.78373	9.95682	7.90536	12.0318	7.55141	11.3771	7.78962	16.2577	11.1033	14.2687	11.8771	15.6225	10.7859	15.5438	11.7577
ENSGALG00000044625	1	complement(59980841..59982553)	ENSGALG00000044625	10	12	6	8	14	0	5	8	0.370105	0.426958	0.249525	0.301463	0.415332	0	0.237846	0.295979	0.975734	1.08845	0.620299	0.739632	1.09796	0	0.610208	0.750478	0.445416	0.47928	0.274398	0.343022	0.44007	0	0.257348	0.349672
ENSGALG00000012958	1	59988534..59990025	ENSGALG00000012958	466	681	321	469	459	228	322	465	9.12052	12.8133	7.05953	9.34597	7.20093	5.36054	8.10008	9.0977	24.0451	32.6649	17.5494	22.9301	19.0362	13.407	20.7813	23.068	20.7564	27.1991	14.6803	20.1096	14.428	11.1781	16.5732	20.3247
ENSGALG00000012969	1	59990319..59992246	ENSGALG00000012969	30	35	27	25	21	15	13	11	0.597164	0.66976	0.603911	0.506676	0.335069	0.358677	0.332595	0.218882	1.57434	1.70742	1.50128	1.24312	0.885779	0.897072	0.853293	0.554993	1.33625	1.3979	1.23479	1.07194	0.660104	0.7354	0.669106	0.480799
ENSGALG00000039636	1	60007870..60009501	ENSGALG00000039636	13	29	20	30	34	13	19	18	0.872683	1.8715	1.50862	2.05047	1.82951	1.04833	1.63933	1.2079	2.30071	4.77103	3.75031	5.03077	4.83644	2.62192	4.20581	3.06273	0.579041	1.15826	0.914659	1.28633	1.06874	0.637346	0.977924	0.786761
WASHC1	1	complement(60010721..60049926)	ENSGALG00000012974	599	765	569	590	1017	613	536	590	8.4746	10.4048	9.0457	8.4989	11.5334	10.4182	9.7467	8.3443	22.3422	26.525	22.4869	20.8519	30.4893	26.0565	25.0058	21.1576	26.6804	30.5541	26.022	25.2979	31.9679	30.0533	27.5877	25.7883
ENSGALG00000012975	1	60069873..60168362	ENSGALG00000012975	16	19	15	24	29	15	13	10	0.148465	0.169488	0.156399	0.226744	0.215698	0.1672	0.155042	0.0927579	0.39141	0.432076	0.388796	0.55631	0.570213	0.418177	0.39777	0.235195	0.712666	0.75886	0.685994	1.02907	0.911573	0.7354	0.669106	0.43709
ENSGALG00000044164	1	60170516..60170866	ENSGALG00000044164	0	0	0	0	0	0	0	0	0	0	0	0	0	0	0	0	0	0	0	0	0	0	0	0	0	0	0	0	0	0	0	0
ENSGALG00000019291	1	complement(60182541..60202082)	ENSGALG00000019291	0	0	0	0	0	0	0	0	0	0	0	0	0	0	0	0	0	0	0	0	0	0	0	0	0	0	0	0	0	0	0	0
SLC6A12	1	complement(60223646..60250104)	ENSGALG00000019290	18	7	3	1	7	5	0	7	0.288171	0.107734	0.053968	0.0163003	0.0898293	0.0961585	0	0.112026	0.759725	0.274648	0.13416	0.0399924	0.23747	0.240498	0	0.284052	0.801749	0.27958	0.137199	0.0428777	0.220035	0.245133	0	0.305963
SLC6A13	1	complement(60262382..60287559)	ENSGALG00000012985	1	5	2	2	4	0	1	2	0.0161155	0.0774628	0.0362169	0.0328165	0.051671	0	0.0207131	0.0322195	0.0424864	0.197476	0.0900324	0.0805146	0.136596	0	0.0531406	0.0816952	0.0445416	0.1997	0.0914659	0.0857554	0.125734	0	0.0514697	0.0874179
KDM5A	1	complement(60300831..60346518)	ENSGALG00000012986	864	864	668	717	1178	673	698	891	4.92965	4.73909	4.28268	4.16523	5.38753	4.61272	5.11867	5.08189	12.9964	12.0814	10.6464	10.2193	14.2423	11.5367	13.1323	12.8855	38.4839	34.5082	30.5496	30.7433	37.0287	32.9949	35.9258	38.9447
CCDC77	1	60351125..60361329	ENSGALG00000012987	44	74	59	51	70	38	38	34	0.890407	1.43962	1.34161	1.05081	1.13547	0.923761	0.98837	0.687797	2.34744	3.67002	3.33513	2.57814	3.0017	2.31038	2.53573	1.74396	1.95983	2.95556	2.69824	2.18676	2.20035	1.86301	1.95585	1.4861
B4GALNT3	1	60369118..60426095	ENSGALG00000012988	23	25	14	27	37	24	30	32	0.233448	0.243939	0.159672	0.279026	0.301028	0.292627	0.391367	0.324682	0.615455	0.621876	0.396931	0.684584	0.795789	0.731876	1.00408	0.823256	1.02446	0.9985	0.640261	1.1577	1.16304	1.17664	1.54409	1.39869
NINJ2	1	complement(60431752..60475878)	ENSGALG00000012989	20	18	27	35	41	23	45	28	0.334302	0.289242	0.50712	0.595656	0.549333	0.461825	0.966767	0.467856	0.881345	0.737366	1.26066	1.46143	1.4522	1.15505	2.4803	1.18629	0.890832	0.71892	1.23479	1.50072	1.28878	1.12761	2.31614	1.22385
WNK1	1	60503911..60601007	ENSGALG00000012992	2304	2452	2023	1710	3485	1861	1759	2132	9.21389	9.42671	9.09062	6.96265	11.1713	8.9402	9.04121	8.52301	24.2912	24.0316	22.5986	17.0827	29.5323	22.3599	23.1958	21.6108	102.624	97.9329	92.5177	73.3209	109.546	91.2386	90.5352	93.1875
RAD52	1	complement(60605354..60617652)	ENSGALG00000039171	55	90	55	70	85	54	40	57	0.724108	1.1391	0.813656	0.938333	0.89702	0.854033	0.676863	0.750172	1.90902	2.90392	2.02268	2.30218	2.37134	2.13598	1.73653	1.90212	2.44979	3.5946	2.51531	3.00144	2.67185	2.64744	2.05879	2.49141
ERC1	1	60628356..60904443	ENSGALG00000012994	460	248	237	205	358	184	241	325	3.96944	2.05732	2.29804	1.80113	2.47627	1.90735	2.67294	2.8035	10.4649	5.24475	5.71274	4.41902	6.54619	4.77039	6.85759	7.1085	20.4891	9.90512	10.8387	8.78993	11.2532	9.0209	12.4042	14.2054
FBXL14	1	complement(60955902..60957527)	ENSGALG00000032159	775	655	606	676	866	663	484	760	18.2214	14.8047	16.01	16.1825	16.3208	18.7255	14.626	17.8624	48.0384	37.7419	39.7995	39.7034	43.1452	46.8336	37.524	45.2915	34.5197	26.1607	27.7142	28.9853	27.2214	32.5047	24.9113	33.2188
WNT5B	1	60973501..60989342	ENSGALG00000012998	40	30	31	32	51	48	66	22	1.05515	0.760773	0.918869	0.859455	1.07837	1.52102	2.23768	0.580126	2.78177	1.93944	2.28424	2.10865	2.85075	3.80417	5.74092	1.47096	1.78166	1.1982	1.41772	1.37209	1.60311	2.35328	3.397	0.961597
ADIPOR2	1	60997447..61037837	ENSGALG00000035533	3423	3049	2792	2643	4054	2550	2398	3318	52.1691	44.6728	47.8145	41.0131	49.526	46.686	46.9738	50.5508	137.537	113.885	118.863	100.625	130.926	116.764	120.514	128.176	152.466	121.777	127.686	113.326	127.432	125.018	123.424	145.026
ENSGALG00000036964	1	complement(61042808..61105795)	ENSGALG00000036964	0	2	0	1	0	1	0	1	0	0.035784	0	0.0189495	0	0.0223573	0	0.0186048	0	0.0912243	0	0.0464922	0	0.0559169	0	0.0471739	0	0.07988	0	0.0428777	0	0.0490266	0	0.043709
CHUNK-1	1	61050761..61052686	ENSGALG00000013008	2	0	1	0	1	0	0	0	0.0303233	0	0.0170366	0	0.0121531	0	0	0	0.0799433	0	0.0423517	0	0.0321277	0	0	0	0.0890832	0	0.0457329	0	0.0314335	0	0	0
LRTM2	1	61076893..61086163	ENSGALG00000026214	53	22	7	55	30	33	41	28	1.11907	0.446562	0.166079	1.18239	0.507743	0.837017	1.11266	0.590994	2.95027	1.13842	0.41286	2.90097	1.34226	2.09343	2.85461	1.49851	2.3607	0.87868	0.320131	2.35827	0.943006	1.61788	2.11026	1.22385
ENSGALG00000013007	1	complement(61117075..61153757)	ENSGALG00000013007	0	0	0	0	0	0	0	1	0	0	0	0	0	0	0	0.0148102	0	0	0	0	0	0	0	0.0375524	0	0	0	0	0	0	0	0.043709
ENSGALG00000038402	1	complement(61212908..61216681)	ENSGALG00000038402	23	23	20	28	47	26	24	31	1.83505	1.76412	1.79303	2.27456	3.00581	2.49192	2.46112	2.47245	4.83788	4.49728	4.45734	5.58058	7.94608	6.23244	6.31415	6.2691	1.02446	0.91862	0.914659	1.20058	1.47738	1.27469	1.23527	1.35498
CACNA1C	1	61471636..61671542	ENSGALG00000013022	415	464	410	375	691	402	399	356	1.90663	2.04935	2.1166	1.75416	2.54471	2.21863	2.35609	1.63498	5.02658	5.22442	5.26171	4.30378	6.72714	5.54892	6.04469	4.14563	18.4848	18.5322	18.7505	16.0791	21.7206	19.7087	20.5364	15.5604
IL17RA	1	61679420..61699251	ENSGALG00000033887	679	689	644	668	1066	621	633	708	6.07466	5.92585	6.47404	6.08481	7.64455	6.67396	7.27873	6.33185	16.015	15.1068	16.0939	14.9289	20.2089	16.692	18.674	16.0549	30.2437	27.5187	29.452	28.6423	33.5082	30.4455	32.5803	30.9459
TMEM121B	1	complement(61705797..61706729)	ENSGALG00000027408	0	0	0	0	0	0	0	0	0	0	0	0	0	0	0	0	0	0	0	0	0	0	0	0	0	0	0	0	0	0	0	0
HDHD5	1	complement(61716796..61721741)	ENSGALG00000013026	424	318	258	358	499	265	258	439	9.01117	6.49713	6.1613	7.7467	8.50077	6.76553	7.0475	9.32664	23.7568	16.5632	15.3165	19.0064	22.4724	16.921	18.0808	23.6484	18.8856	12.7009	11.7991	15.3502	15.6853	12.9921	13.2792	19.1882
CECR1	1	complement(61727940..61744165)	ENSGALG00000013031	319	222	266	341	454	277	268	227	4.75752	3.18289	4.45768	5.178	5.42735	4.9626	5.13718	3.38424	12.5426	8.11417	11.0814	12.7041	14.3476	12.4118	13.1797	8.581	14.2088	8.86668	12.165	14.6213	14.2708	13.5804	13.7939	9.92193
CECR2	1	61754952..61846994	ENSGALG00000013034	56	61	59	48	111	46	53	85	0.34514	0.361423	0.408598	0.301208	0.548369	0.340569	0.419839	0.523686	0.909917	0.921379	1.01574	0.739007	1.44965	0.851783	1.07712	1.32785	2.49433	2.43634	2.69824	2.05813	3.48912	2.25523	2.72789	3.71526
ATP6V1E1	1	complement(61860171..61869779)	ENSGALG00000013036	1562	1706	1514	1537	1719	1205	1166	1581	22.1635	23.271	24.139	22.2049	19.5513	20.5392	21.2645	22.4251	58.4311	59.3249	60.0077	54.4792	51.6853	51.3698	54.5554	56.8606	69.574	68.1376	69.2397	65.9031	54.0343	59.0771	60.0136	69.1039
BCL2L13	1	61870544..61907992	ENSGALG00000013037	474	451	407	535	625	371	473	493	7.82001	7.15294	7.54503	8.98672	8.26516	7.35264	10.0298	8.13057	20.6164	18.235	18.7563	22.0487	21.8496	18.3894	25.732	20.6157	21.1127	18.0129	18.6133	22.9396	19.646	18.1889	24.3452	21.5485
BID	1	complement(61913394..61932331)	ENSGALG00000013039	635	700	692	740	858	626	597	686	9.95856	10.5536	12.1946	11.8161	10.7858	11.7933	12.0336	10.7545	26.2544	26.9043	30.3147	28.9904	28.5131	29.4958	30.8731	27.269	28.2839	27.958	31.6472	31.7295	26.97	30.6907	30.7274	29.9843
ENSGALG00000032764	1	complement(61939516..61957027)	ENSGALG00000032764	103	122	84	99	148	86	74	100	5.56988	6.34231	5.10417	5.45082	6.41524	5.58659	5.14328	5.40572	14.6843	16.1685	12.6886	13.3735	16.9591	13.9724	13.1954	13.7066	4.58778	4.87268	3.84157	4.24489	4.65216	4.21629	3.80876	4.3709
ENSGALG00000032607	1	complement(61962470..61964566)	ENSGALG00000032607	165	146	111	93	227	114	116	167	3.9952	3.3985	3.02006	2.29275	4.40578	3.31589	3.61005	4.04219	10.5328	8.66381	7.50762	5.6252	11.647	8.29323	9.2618	10.2493	7.34936	5.83124	5.07636	3.98763	7.13541	5.58904	5.97048	7.2994
ENSGALG00000013042	1	complement(61977760..62038931)	ENSGALG00000013042	463	370	213	219	432	278	313	506	4.32508	3.32272	2.23579	2.08294	3.23474	3.1196	3.75801	4.72508	11.4025	8.47064	5.55799	5.11043	8.55128	7.80228	9.6414	11.9808	20.6228	14.7778	9.74111	9.39022	13.5793	13.6294	16.11	22.1167
PEX26	1	62114295..62118050	ENSGALG00000019286	112	126	132	124	170	115	127	129	3.8252	4.137	5.06579	4.31197	4.65401	4.71818	5.57494	4.40424	10.0846	10.5465	12.5932	10.5793	12.3032	11.8004	14.3028	11.1673	4.98866	5.03244	6.03675	5.31684	5.3437	5.63806	6.53665	5.63846
TUBA8B	1	62121851..62125401	ENSGALG00000013045	3	11	0	7	14	10	3	5	0.0629791	0.221997	0	0.149621	0.235584	0.252183	0.0809462	0.104928	0.166036	0.565938	0	0.367091	0.622783	0.630723	0.207673	0.266053	0.133625	0.43934	0	0.300144	0.44007	0.490266	0.154409	0.218545
ENSGALG00000013056	1	62133259..62136787	ENSGALG00000013056	0	2	0	0	0	0	1	0	0	0.0415889	0	0	0	0	0.0278015	0	0	0.106023	0	0	0	0	0.0713265	0	0	0.07988	0	0	0	0	0.0514697	0
ENSGALG00000013057	1	62144164..62154171	ENSGALG00000013057	119	178	80	119	170	227	82	140	2.9905	4.30026	2.25904	3.04482	3.42442	6.85271	2.64856	3.51698	7.88405	10.9627	5.61579	7.47039	9.05272	17.139	6.79505	8.91758	5.30045	7.10932	3.65863	5.10245	5.3437	11.129	4.22051	6.11925
ENSGALG00000013058	1	62161773..62170124	ENSGALG00000013058	1	0	1	0	0	0	0	0	0.0266679	0	0.0299658	0	0	0	0	0	0.0703063	0	0.0744925	0	0	0	0	0	0.0445416	0	0.0457329	0	0	0	0	0
AKR1B10L1	1	complement(62176428..62185484)	ENSGALG00000045122	1458	2191	2503	2207	3394	3228	3544	2273	27.3095	39.4528	52.681	42.0898	50.9578	72.6323	85.3198	42.5599	71.9979	100.577	130.961	103.266	134.711	181.658	218.893	107.914	64.9417	87.5085	114.47	94.6311	106.685	158.258	182.409	99.3505
ENSGALG00000019284	1	complement(62190360..62197559)	ENSGALG00000019284	8532	9089	7860	10562	11773	11583	7753	12985	163.267	167.203	169.008	205.784	180.583	266.262	190.685	248.39	430.432	426.251	420.141	504.887	477.385	665.936	489.215	629.814	380.029	363.015	359.461	452.874	370.067	567.876	399.044	567.561
AKR1B1L	1	complement(62199783..62231384)	ENSGALG00000003466	10345	18392	13156	16575	14206	14784	9193	14455	57.1811	97.7304	81.7114	93.2811	62.9413	98.1643	65.3099	79.8702	150.75	249.145	203.128	228.863	166.39	245.515	167.557	202.517	460.783	734.577	601.662	710.698	446.545	724.81	473.161	631.813
BPGM	1	62239536..62258379	ENSGALG00000013069	454	506	542	400	595	390	476	303	3.27424	3.5082	4.39229	2.9372	3.43965	3.37878	4.41226	2.18445	8.6321	8.94348	10.9189	7.20634	9.09296	8.45051	11.3199	5.53885	20.2219	20.2096	24.7872	17.1511	18.703	19.1204	24.4996	13.2438
CALD1	1	62436030..62495064	ENSGALG00000033471	6583	14656	16414	15517	20761	9274	12873	10029	46.5792	99.6925	130.503	111.788	117.749	78.827	117.071	70.9366	122.8	254.147	324.419	274.268	311.279	197.151	300.352	179.866	293.217	585.361	750.66	665.334	652.592	454.673	662.569	438.357
AKR1B10L2	1	complement(62496373..62504516)	ENSGALG00000013072	252	335	328	347	361	187	226	172	4.94871	6.32434	7.23773	6.93808	5.68252	4.41137	5.70427	3.37649	13.0466	16.1227	17.9924	17.0224	15.0222	11.0331	14.6347	8.56135	11.2245	13.3799	15.0004	14.8786	11.3475	9.16798	11.6321	7.51794
RERG	1	complement(62659918..62765595)	ENSGALG00000028186	142	133	110	149	136	84	106	105	5.67248	5.10758	4.93759	6.06024	4.35478	4.03092	5.4424	4.19295	14.9548	13.0208	12.2745	14.8686	11.5122	10.0816	13.9628	10.6316	6.32491	5.31202	5.03062	6.38878	4.27496	4.11824	5.45579	4.58944
PTPRO	1	62813644..62962492	ENSGALG00000013085	6	7	23	8	29	17	16	12	0.03324	0.0372809	0.143177	0.045125	0.12878	0.113135	0.113928	0.0664562	0.0876328	0.0950405	0.355928	0.110713	0.34044	0.282958	0.292289	0.168505	0.26725	0.27958	1.05186	0.343022	0.911573	0.833453	0.823515	0.524507
ENSGALG00000013091	1	complement(63005065..63019412)	ENSGALG00000013091	676	637	470	650	885	599	583	801	35.761	32.3953	27.9382	35.0102	37.5274	38.0654	39.6398	42.3585	94.2793	82.5855	69.4521	85.8968	99.2065	95.2037	101.698	107.403	30.1101	25.4418	21.4945	27.8705	27.8187	29.367	30.0068	35.0109
STRAP	1	63130281..63139430	ENSGALG00000013092	1624	1906	1583	1842	2436	1475	1370	1593	23.2922	26.2801	25.5119	26.8988	28.0056	25.413	25.2549	22.8394	61.4069	66.996	63.4205	65.9955	74.0348	63.5595	64.7929	57.9112	72.3356	76.1256	72.3952	78.9808	76.5721	72.3143	70.5135	69.6284
DERA	1	63141051..63194875	ENSGALG00000013095	1561	1277	1159	1655	1318	1267	1229	1215	28.4362	22.3634	23.7241	30.6962	19.2454	27.7259	28.7754	22.1254	74.9684	57.0113	58.9762	75.3125	50.8766	69.344	73.825	56.1006	69.5294	51.0034	53.0045	70.9626	41.4294	62.1168	63.2562	53.1064
SLC15A5	1	complement(63246522..63275110)	ENSGALG00000013097	0	1	0	1	1	0	0	0	0	0.0172967	0	0.018319	0.014422	0	0	0	0	0.0440946	0	0.0449453	0.0381257	0	0	0	0	0.03994	0	0.0428777	0.0314335	0	0	0
MGST1	1	63309031..63315665	ENSGALG00000013098	4944	6813	5670	6630	6999	5235	4442	5978	129.714	171.84	167.158	177.108	147.192	164.992	149.791	156.786	341.973	438.073	415.542	434.531	389.114	412.655	384.298	397.544	220.214	272.111	259.306	284.279	220.003	256.655	228.628	261.292
LMO3	1	complement(63383606..63450107)	ENSGALG00000036358	12	11	8	8	11	11	23	12	0.225058	0.198329	0.168594	0.152764	0.165367	0.247826	0.554423	0.224978	0.593337	0.505601	0.41911	0.374804	0.43716	0.619826	1.42241	0.57045	0.534499	0.43934	0.365863	0.343022	0.345769	0.539293	1.1838	0.524507
RERGL	1	complement(63944334..63952948)	ENSGALG00000013112	473	629	599	811	968	515	547	580	5.80102	7.41605	8.25481	10.127	9.51614	7.58735	8.62244	7.11076	15.2936	18.9058	20.5208	24.8464	25.1566	18.9764	22.1214	18.0299	21.0682	25.1223	27.394	34.7738	30.4277	25.2487	28.1539	25.3512
PIK3C2G	1	64035202..64232501	ENSGALG00000013117	287	454	386	345	629	318	440	693	1.88884	2.87242	2.85455	2.3118	3.31823	2.51409	3.72191	4.55923	4.97968	7.32268	7.09618	5.67195	8.77197	6.28787	9.54879	11.5603	12.7834	18.1328	17.6529	14.7928	19.7717	15.5905	22.6467	30.2903
PLCZ1	1	complement(64235354..64278321)	ENSGALG00000013123	0	0	1	0	0	0	0	0	0	0	0.0153473	0	0	0	0	0	0	0	0.0381522	0	0	0	0	0	0	0	0.0457329	0	0	0	0	0
CAPZA3	1	64278396..64279363	ENSGALG00000013125	0	0	0	0	0	0	0	1	0	0	0	0	0	0	0	0.0301559	0	0	0	0	0	0	0	0.0764627	0	0	0	0	0	0	0	0.043709
PLEKHA5	1	64403222..64534173	ENSGALG00000013134	390	320	284	338	454	308	314	470	5.87642	4.6353	4.80844	5.18541	5.48336	5.57493	6.08104	7.07932	15.4924	11.8168	11.9534	12.7223	14.4957	13.9432	15.6013	17.9502	17.3712	12.7808	12.9882	14.4927	14.2708	15.1002	16.1615	20.5432
AEBP2	1	64608864..64635734	ENSGALG00000038026	198	189	186	191	254	159	142	174	7.24544	6.64875	7.64803	7.11625	7.45033	6.98935	6.67864	6.36493	19.1017	16.9497	19.0124	17.4596	19.6955	17.4808	17.1345	16.1388	8.81924	7.54866	8.50632	8.18964	7.98412	7.79524	7.30869	7.60536
PDE3A	1	64936305..65172126	ENSGALG00000013143	1058	820	759	685	1236	863	779	1289	10.5732	7.87798	8.52317	6.96997	9.90109	10.3603	10.006	12.8772	27.8749	20.0834	21.1879	17.1007	26.1743	25.9117	25.671	32.6511	47.125	32.7508	34.7113	29.3712	38.8519	42.31	40.0949	56.3408
SLCO1C1	1	65190416..65211651	ENSGALG00000013154	0	0	0	2	0	2	0	0	0	0	0	0.0278779	0	0.0328913	0	0	0	0	0	0.0683977	0	0.0822631	0	0	0	0	0	0.0857554	0	0.0980533	0	0
SLCO1B3	1	65220692..65238854	ENSGALG00000019277	0	0	0	0	0	0	0	0	0	0	0	0	0	0	0	0	0	0	0	0	0	0	0	0	0	0	0	0	0	0	0	0
ENSGALG00000019276	1	complement(65238465..65266821)	ENSGALG00000019276	2	3	3	6	5	1	9	3	0.0267656	0.0385965	0.0451135	0.0817555	0.0536364	0.0160764	0.154807	0.0401341	0.0705641	0.0983943	0.112148	0.200585	0.141792	0.0402079	0.397167	0.101763	0.0890832	0.11982	0.137199	0.257266	0.157168	0.0490266	0.463227	0.131127
SLCO1A2	1	complement(65283618..65301027)	ENSGALG00000031293	2	3	0	1	0	0	5	2	0.0294072	0.0424056	0	0.0149707	0	0	0.0944916	0.0293967	0.0775281	0.108105	0	0.0367302	0	0	0.242424	0.0745376	0.0890832	0.11982	0	0.0428777	0	0	0.257348	0.0874179
IAPP	1	65318628..65322354	ENSGALG00000013168	354	323	383	323	345	202	347	183	13.3212	11.6848	16.1948	12.3755	10.4064	9.13129	16.783	6.88394	35.1196	29.7882	40.2591	30.3629	27.5102	22.8379	43.0579	17.4548	15.7677	12.9006	17.5157	13.8495	10.8446	9.90338	17.86	7.99874
PYROXD1	1	65351681..65366792	ENSGALG00000013173	450	570	562	602	891	645	699	603	6.80507	8.28655	9.54979	9.26904	10.8004	11.7171	13.5862	9.11554	17.9407	21.125	23.74	22.7414	28.5517	29.3051	34.8562	23.1132	20.0437	22.7658	25.7019	25.8124	28.0073	31.6222	35.9773	26.3565
RECQL	1	complement(65371068..65390497)	ENSGALG00000013174	403	419	317	428	550	379	372	378	3.3604	3.35876	2.97018	3.63369	3.67613	3.79634	3.98684	3.15082	8.85926	8.56252	7.38363	8.91518	9.71813	9.49487	10.2285	7.98915	17.9503	16.7349	14.4973	18.3517	17.2884	18.5811	19.1467	16.522
GOLT1B	1	65390754..65401845	ENSGALG00000033855	427	528	447	514	616	336	347	435	8.06009	9.58131	9.48106	9.87855	9.32041	7.61888	8.41863	8.20817	21.2494	24.4257	23.5692	24.2368	24.6392	19.0553	21.5985	20.8125	19.0193	21.0883	20.4426	22.0391	19.3631	16.473	17.86	19.0134
BCAT1	1	65432216..65472333	ENSGALG00000013177	60	44	48	33	76	31	61	47	1.02701	0.724027	0.923213	0.575116	1.04275	0.637419	1.342	0.804204	2.70758	1.84577	2.29503	1.41103	2.75658	1.59422	3.44299	2.03912	2.6725	1.75736	2.19518	1.41496	2.38895	1.51983	3.13965	2.05432
ENSGALG00000044826	1	complement(65539547..65540590)	ENSGALG00000044826	0	0	0	0	0	0	0	0	0	0	0	0	0	0	0	0	0	0	0	0	0	0	0	0	0	0	0	0	0	0	0	0
ENSGALG00000046453	1	complement(65542751..65543794)	ENSGALG00000046453	1	0	0	0	0	0	0	0	0.0279706	0	0	0	0	0	0	0	0.0737408	0	0	0	0	0	0	0	0.0445416	0	0	0	0	0	0	0
ENSGALG00000046127	1	complement(65890900..65891943)	ENSGALG00000046127	1	0	0	0	0	0	0	0	0.0279706	0	0	0	0	0	0	0	0.0737408	0	0	0	0	0	0	0	0.0445416	0	0	0	0	0	0	0
ENSGALG00000044966	1	complement(65894110..65895153)	ENSGALG00000044966	0	0	0	0	0	0	0	0	0	0	0	0	0	0	0	0	0	0	0	0	0	0	0	0	0	0	0	0	0	0	0	0
ENSGALG00000044198	1	complement(65897320..65898363)	ENSGALG00000044198	0	0	0	0	0	0	0	0	0	0	0	0	0	0	0	0	0	0	0	0	0	0	0	0	0	0	0	0	0	0	0	0
SOX5	1	65938356..66226982	ENSGALG00000032768	38	32	36	31	71	22	33	28	0.478504	0.387374	0.509379	0.397449	0.716642	0.332785	0.534091	0.352456	1.26151	0.987536	1.26628	0.975132	1.8945	0.832315	1.37024	0.89368	1.69258	1.27808	1.64639	1.32921	2.23178	1.07859	1.6985	1.22385
ETNK1	1	complement(66507344..66533577)	ENSGALG00000013205	2023	1465	1014	908	1348	1212	1164	1730	41.5139	28.9011	23.3815	18.9715	22.1733	29.8772	30.7008	35.4886	109.446	73.6777	58.1246	46.5461	58.6167	74.7246	78.765	89.9842	90.1077	58.5121	46.3732	38.933	42.3724	59.4203	59.9107	75.6165
C2CD5	1	66556785..66622909	ENSGALG00000013210	900	1091	819	865	1301	881	822	969	8.09648	9.43534	8.27895	7.92297	9.38153	9.52072	9.50442	8.7141	21.3453	24.0536	20.5808	19.4388	24.8008	23.8119	24.3842	22.0953	40.0874	43.5745	37.4553	37.0892	40.895	43.1925	42.3081	42.354
ENSGALG00000046175	1	complement(66641208..66642216)	ENSGALG00000046175	3	0	4	1	4	0	1	4	0.102822	0	0.154049	0.0348964	0.109892	0	0.0440517	0.137046	0.271076	0	0.382955	0.0856176	0.290507	0	0.113017	0.347492	0.133625	0	0.182932	0.0428777	0.125734	0	0.0514697	0.174836
ST8SIA1	1	66641628..66757539	ENSGALG00000013211	35	29	43	16	53	22	40	25	0.836371	0.666205	1.15461	0.389287	1.01519	0.63153	1.22855	0.597195	2.20498	1.69836	2.87028	0.955106	2.68374	1.57949	3.15191	1.51424	1.55896	1.15826	1.96652	0.686043	1.66598	1.07859	2.05879	1.09272
C3AR1	1	66846831..66850139	ENSGALG00000013218	279	275	438	329	403	200	257	185	4.41581	4.18425	7.78964	5.30176	5.11274	3.80256	5.22804	2.927	11.6417	10.6669	19.3644	13.0077	13.5159	9.51042	13.4129	7.42165	12.4271	10.9835	20.031	14.1068	12.6677	9.80533	13.2277	8.08616
ENSGALG00000013226	1	66881497..66887420	ENSGALG00000013226	1	3	0	0	2	1	0	0	0.0315009	0.0908496	0	0	0.0505004	0.037841	0	0	0.0830479	0.231603	0	0	0.133502	0.0946425	0	0	0.0445416	0.11982	0	0	0.0628671	0.0490266	0	0
CMAS	1	complement(66896905..66907097)	ENSGALG00000013229	1441	1732	1559	1832	2349	1602	1574	1634	16.94	19.5739	20.5937	21.9278	22.1348	22.6232	23.7824	19.2021	44.6602	49.8999	51.1943	53.7993	58.515	56.5818	61.0152	48.6884	64.1844	69.1761	71.2976	78.552	73.8374	78.5407	81.0133	71.4204
ABCC9	1	66927420..66999781	ENSGALG00000013244	344	420	379	371	572	335	331	331	1.99786	2.34496	2.47334	2.19381	2.66284	2.33718	2.47079	1.92168	5.2671	5.97802	6.14852	5.38247	7.03942	5.84542	6.33895	4.87256	15.3223	16.7748	17.3328	15.9076	17.98	16.4239	17.0365	14.4677
KCNJ8	1	67009473..67016833	ENSGALG00000026373	458	730	596	651	926	580	442	505	3.75997	5.7613	5.49797	5.44149	6.09357	5.71988	4.66381	4.14434	9.91266	14.6873	13.6675	13.3506	16.1088	14.3057	11.9653	10.5083	20.4001	29.1562	27.2568	27.9134	29.1075	28.4355	22.7496	22.073
LDHB	1	67084337..67094047	ENSGALG00000035836	3369	3606	4084	3632	5486	2617	3509	3358	70.8274	72.8794	96.4768	77.7435	92.4482	66.0912	94.8164	70.5709	186.727	185.792	239.834	190.742	244.394	165.298	243.257	178.938	150.061	144.024	186.773	155.732	172.444	128.303	180.607	146.775
GYS2	1	67102124..67141501	ENSGALG00000013265	314	331	269	273	637	320	385	422	4.34148	4.39962	4.17925	3.84317	7.05976	5.31494	6.84178	5.83265	11.4458	11.216	10.3893	9.42912	18.663	13.293	17.553	14.7892	13.9861	13.2201	12.3022	11.7056	20.0232	15.6885	19.8158	18.4452
SPX	1	complement(67167377..67170581)	ENSGALG00000013273	0	0	0	0	0	0	0	0	0	0	0	0	0	0	0	0	0	0	0	0	0	0	0	0	0	0	0	0	0	0	0	0
LRMP	1	67203135..67215800	ENSGALG00000014011	200	202	280	260	277	183	162	171	3.79484	3.68463	5.96979	5.02291	4.21295	4.17114	3.95074	3.24343	10.0046	9.39326	14.8404	12.3236	11.1372	10.4323	10.1359	8.22399	8.90832	8.06788	12.8052	11.1482	8.70709	8.97188	8.33809	7.47423
ENSGALG00000014030	1	complement(67216258..67232162)	ENSGALG00000014030	2	12	3	2	4	0	2	2	0.0297214	0.171435	0.0500955	0.0302613	0.0476477	0	0.0382006	0.0297108	0.0783567	0.437041	0.124533	0.0742455	0.12596	0	0.0980059	0.0753342	0.0890832	0.47928	0.137199	0.0857554	0.125734	0	0.102939	0.0874179
ETFRF1	1	67235341..67242703	ENSGALG00000014031	186	218	144	187	221	168	151	200	3.60414	4.06092	3.13537	3.68934	3.4326	3.91056	3.76068	3.87404	9.50185	10.3525	7.79428	9.05172	9.07434	9.78052	9.64825	9.82294	8.28474	8.70692	6.58554	8.01813	6.94681	8.23648	7.77192	8.74179
KRAS	1	complement(67241669..67263388)	ENSGALG00000030943	713	678	462	537	761	559	504	628	16.7233	15.2877	12.1762	12.8241	14.3074	15.7502	15.1937	14.7244	44.0889	38.973	30.2691	31.4635	37.8226	39.392	38.9804	37.3349	31.7582	27.0793	21.1286	23.0253	23.9209	27.4059	25.9407	27.4492
ENSGALG00000044844	1	complement(67412869..67416674)	ENSGALG00000044844	0	0	0	0	0	0	0	0	0	0	0	0	0	0	0	0	0	0	0	0	0	0	0	0	0	0	0	0	0	0	0	0
ENSGALG00000014041	1	67608354..67618608	ENSGALG00000014041	17	19	21	21	23	16	15	32	1.41431	1.51959	1.96314	1.77882	1.53379	1.59903	1.60393	2.66128	3.72864	3.87391	4.88022	4.3643	4.05468	3.99925	4.11499	6.74789	0.757207	0.75886	0.960392	0.900432	0.722971	0.784426	0.772045	1.39869
BHLHE41	1	complement(67641436..67643827)	ENSGALG00000041414	32	28	36	29	28	23	34	21	1.09676	0.922571	1.38644	1.012	0.769242	0.946958	1.49776	0.719494	2.89147	2.35192	3.44659	2.48291	2.03355	2.3684	3.84259	1.82433	1.42533	1.11832	1.64639	1.24345	0.880139	1.12761	1.74997	0.917888
SSPN	1	67665579..67683309	ENSGALG00000014042	146	241	265	262	266	156	209	194	5.68452	9.02064	11.5938	10.3863	8.30166	7.29635	10.4589	7.55071	14.9865	22.9964	28.8212	25.4825	21.9461	18.2486	26.833	19.1454	6.50307	9.62554	12.1192	11.234	8.36132	7.64816	10.7572	8.47954
ENSGALG00000043301	1	complement(67712621..67740455)	ENSGALG00000043301	426	488	366	415	636	366	293	377	14.9877	16.5053	14.4691	14.8659	17.9359	15.4684	13.2493	13.259	39.513	42.0771	35.9691	36.4731	47.4149	38.6873	33.9918	33.6193	18.9747	19.4907	16.7383	17.7943	19.9917	17.9438	15.0806	16.4783
ENSGALG00000014071	1	complement(67751004..67983940)	ENSGALG00000014071	1935	1230	981	966	1744	921	978	1351	8.12197	4.96323	4.62686	4.12834	5.86772	4.64387	5.27617	5.66867	21.4125	12.6528	11.502	10.1288	15.5117	11.6146	13.5364	14.3734	86.188	49.1262	44.864	41.4199	54.8201	45.1535	50.3373	59.0508
INTS13	1	complement(68025368..68044088)	ENSGALG00000014083	3070	3884	3403	4223	4568	3299	2872	3673	40.4184	49.1585	50.3431	56.6083	48.2069	52.1751	48.5988	48.34	106.558	125.32	125.149	138.887	127.439	130.493	124.683	122.57	136.743	155.127	155.629	181.073	143.588	161.739	147.821	160.543
FGFR1OP2	1	68045364..68056671	ENSGALG00000014084	2075	2237	2126	2663	2563	2246	1815	2514	19.5587	20.2706	22.5176	25.557	19.3647	25.4314	21.9886	23.6882	51.5638	51.6759	55.9769	62.7036	51.1921	63.6054	56.4131	60.0632	92.4238	89.3458	97.2282	114.183	80.5642	110.114	93.4175	109.884
TM7SF3	1	complement(68062515..68077545)	ENSGALG00000014085	108	111	115	140	167	114	113	108	1.95037	1.92706	2.33361	2.57418	2.41741	2.47307	2.62283	1.94967	5.14188	4.91266	5.80116	6.31569	6.39061	6.1853	6.72904	4.94355	4.81049	4.43334	5.25929	6.00288	5.2494	5.58904	5.81607	4.72057
MED21	1	68078554..68086093	ENSGALG00000027435	411	528	424	446	719	477	382	449	7.92717	9.79015	9.18924	8.7585	11.116	11.0518	9.46978	8.65701	20.899	24.9581	22.8437	21.4888	29.3859	27.6413	24.2953	21.9505	18.3066	21.0883	19.3908	19.1235	22.6007	23.3857	19.6614	19.6253
STK38L	1	68136803..68179594	ENSGALG00000014094	484	481	491	567	816	474	589	471	8.14607	7.78264	9.28585	9.71637	11.0087	9.58344	12.7414	7.92445	21.4761	19.8403	23.0839	23.8389	29.1023	23.9687	32.6889	20.0931	21.5581	19.2111	22.4549	24.3117	25.6498	23.2386	30.3156	20.5869
ARNTL2	1	68192301..68228416	ENSGALG00000014096	600	898	839	765	1093	725	681	662	5.40098	7.771	8.48635	7.01134	7.88649	7.8397	7.87895	5.95696	14.239	19.8107	21.0964	17.2022	20.8485	19.6075	20.214	15.1043	26.725	35.8661	38.3699	32.8015	34.3569	35.5443	35.0509	28.9353
ENSGALG00000045225	1	complement(68253134..68254366)	ENSGALG00000045225	1	1	3	1	1	2	0	2	0.0236831	0.0227677	0.0798358	0.0241133	0.0189837	0.0568996	0	0.0473494	0.0624375	0.0580418	0.198465	0.0591615	0.0501849	0.142309	0	0.120058	0.0445416	0.03994	0.137199	0.0428777	0.0314335	0.0980533	0	0.0874179
PPFIBP1	1	68253314..68353004	ENSGALG00000014106	3288	4211	3812	3697	5645	3201	3632	3249	14.9322	18.3847	19.4528	17.0946	20.5493	17.4629	21.2001	14.7498	39.3667	46.8682	48.358	41.9412	54.3237	43.6758	54.3901	37.3993	146.453	168.187	174.334	158.519	177.442	156.934	186.938	142.01
CYB5R3	1	complement(68359231..68373633)	ENSGALG00000014122	2602	2688	2720	2823	4676	2337	2758	2248	23.1511	22.9917	27.1938	25.5737	33.3488	24.9783	31.5397	19.9943	61.0348	58.613	67.6016	62.7444	88.1601	62.4721	80.9172	50.697	115.897	107.359	124.394	121.044	146.983	114.575	141.953	98.2577
ENSGALG00000014126	1	68381261..68385975	ENSGALG00000014126	767	1015	850	957	971	735	742	863	25.8332	32.8646	32.1691	32.8181	26.2147	29.7379	32.1209	29.0562	68.1059	83.782	79.9699	80.5185	69.3005	74.3762	82.4081	73.6744	34.1634	40.5391	38.873	41.034	30.522	36.0346	38.1905	37.7208
ENSGALG00000019262	1	68393868..68394452	ENSGALG00000019262	27	55	32	31	35	31	35	37	1.34775	2.6393	1.79487	1.57553	1.40042	1.85887	2.24551	1.84626	3.55317	6.72838	4.46191	3.86552	3.7021	4.64913	5.76099	4.68135	1.20262	2.1967	1.46345	1.32921	1.10017	1.51983	1.80144	1.61723
A4GALT	1	complement(68397254..68409951)	ENSGALG00000014128	335	320	425	309	376	235	355	267	2.17436	1.99671	3.09965	2.04203	1.95621	1.83229	2.96152	1.73238	5.73241	5.09023	7.70548	5.01009	5.1714	4.58266	7.59796	4.39258	14.9214	12.7808	19.4365	13.2492	11.819	11.5213	18.2717	11.6703
ARFGAP3	1	complement(68427144..68530323)	ENSGALG00000014140	1838	2522	1987	2038	2482	1812	1772	1974	19.0597	25.1416	23.1529	21.5175	20.6307	22.5719	23.6175	20.4627	50.2483	64.0938	57.5562	52.7927	54.5388	56.4536	60.5921	51.8847	81.8675	100.729	90.8713	87.3848	78.018	88.8363	91.2043	86.2815
PACSIN2	1	complement(68466967..68530324)	ENSGALG00000014159	2243	2546	2245	2304	3246	1869	2299	2361	19.0126	20.7468	21.3829	19.8845	22.0548	19.031	25.0468	20.0057	50.1243	52.8899	53.1562	48.7861	58.3036	47.5977	64.2591	50.7261	99.9068	101.687	102.67	98.7903	102.033	91.6308	118.329	103.197
TTLL1	1	complement(68539740..68556230)	ENSGALG00000014163	27	81	55	74	57	63	51	78	0.51633	1.48911	1.18185	1.44083	0.873737	1.44725	1.25353	1.49109	1.36124	3.7962	2.93799	3.53505	2.30979	3.61966	3.216	3.78077	1.20262	3.23514	2.51531	3.17295	1.79171	3.08868	2.62495	3.4093
BIK	1	68563259..68575275	ENSGALG00000014164	30	47	40	33	76	21	58	42	0.849699	1.27974	1.27304	0.951647	1.72544	0.714501	2.11141	1.18915	2.24012	3.26244	3.16467	2.33484	4.56133	1.78701	5.41694	3.0152	1.33625	1.87718	1.82932	1.41496	2.38895	1.02956	2.98524	1.83578
MCAT	1	complement(68579528..68583815)	ENSGALG00000034275	252	296	220	284	432	229	228	257	9.15265	10.3352	8.97855	10.5023	12.5769	9.9913	10.6434	9.33092	24.1298	26.3475	22.32	25.7671	33.2479	24.9888	27.3064	23.6593	11.2245	11.8222	10.0612	12.1773	13.5793	11.2271	11.7351	11.2332
TSPO	1	68582342..68592207	ENSGALG00000014166	362	349	317	418	575	268	389	294	9.57507	8.87437	9.42171	11.2571	12.1911	8.51546	13.2246	7.77366	25.2434	22.6235	23.4216	27.6191	32.2281	21.2977	33.9286	19.7107	16.1241	13.9391	14.4973	17.9229	18.0743	13.1391	20.0217	12.8504
TTLL12	1	complement(68594267..68614463)	ENSGALG00000014167	1538	1482	1413	1715	2383	1332	1578	1539	19.4254	17.9946	20.0537	22.0545	24.1258	20.2097	25.6166	19.4311	51.2126	45.8737	49.8518	54.1102	63.7782	50.5455	65.721	49.2692	68.505	59.1911	64.6206	73.5353	74.9061	65.3035	81.2192	67.2681
ENSGALG00000014178	1	complement(68626421..68825405)	ENSGALG00000014178	185	123	136	121	222	102	77	132	1.7421	1.11349	1.43905	1.16012	1.6757	1.15383	0.931947	1.24257	4.59281	2.83862	3.57737	2.84634	4.42983	2.88579	2.39097	3.15063	8.2402	4.91262	6.21968	5.1882	6.97825	5.00072	3.96317	5.76958
MPPED1	1	68879643..68941425	ENSGALG00000014186	131	161	146	177	249	127	187	112	1.45562	1.71982	1.82292	2.00248	2.21778	1.6952	2.67066	1.24406	3.83755	4.38434	4.53163	4.91304	5.86287	4.23979	6.85174	3.15441	5.83495	6.43034	6.67701	7.58936	7.82695	6.22638	9.62483	4.8954
ENSGALG00000014188	1	complement(68955990..68964540)	ENSGALG00000014188	0	0	0	0	0	0	0	0	0	0	0	0	0	0	0	0	0	0	0	0	0	0	0	0	0	0	0	0	0	0	0	0
SULT4A1	1	complement(69073337..69106695)	ENSGALG00000014189	120	173	170	179	264	141	166	111	1.4625	2.02694	2.3281	2.2212	2.57906	2.06431	2.6003	1.35233	3.8557	5.16729	5.78747	5.44965	6.81794	5.16295	6.67123	3.42895	5.34499	6.90962	7.7746	7.67511	8.29845	6.91276	8.54397	4.85169
ENSGALG00000029308	1	69135540..69146688	ENSGALG00000029308	351	374	389	466	786	449	683	242	7.49792	7.68041	9.33729	10.1353	13.4586	11.5218	18.7523	5.16767	19.7673	19.5797	23.2118	24.8668	35.5787	28.8167	48.1102	13.103	15.6341	14.9376	17.7901	19.981	24.7068	22.013	35.1538	10.5776
SAMM50	1	69153070..69171235	ENSGALG00000014194	1984	2136	1790	2309	2084	1659	1648	2195	28.165	29.1507	28.5534	33.3742	23.7142	28.2914	30.0694	31.1493	74.2533	74.314	70.9816	81.8827	62.6902	70.7584	77.145	78.9815	88.3705	85.3118	81.8619	99.0046	65.5075	81.3352	84.822	95.9412
PARVB	1	69178093..69234452	ENSGALG00000014201	54	80	82	45	96	42	66	42	0.68859	0.980699	1.17495	0.584249	0.981252	0.643363	1.08171	0.535379	1.81538	2.5001	2.92082	1.43344	2.59401	1.60909	2.77519	1.3575	2.40525	3.1952	3.7501	1.9295	3.01762	2.05912	3.397	1.83578
PARVG	1	69243499..69258876	ENSGALG00000014203	85	85	92	77	136	70	76	48	2.59364	2.49338	3.15439	2.39221	3.32638	2.56583	2.9806	1.46412	6.83779	6.35639	7.84156	5.86923	8.79353	6.4173	7.64692	3.7124	3.78604	3.3949	4.20743	3.30158	4.27496	3.43187	3.9117	2.09803
SHISAL1	1	complement(69360787..69416331)	ENSGALG00000036598	83	95	118	88	130	64	58	90	2.11124	2.32307	3.37272	2.27909	2.65061	1.9556	1.89622	2.28849	5.56602	5.92223	8.3843	5.59169	7.00709	4.89107	4.86487	5.80264	3.69695	3.7943	5.39649	3.77324	4.08636	3.13771	2.98524	3.93381
PRR5	1	69763115..69848437	ENSGALG00000014213	483	522	490	548	737	415	400	431	6.42562	6.67602	7.32489	7.42278	7.85919	6.63218	6.83955	5.73179	16.9403	17.0192	18.2091	18.2116	20.7763	16.5874	17.5473	14.5334	21.5136	20.8487	22.4091	23.497	23.1665	20.3461	20.5879	18.8386
ARHGAP8	1	69904874..69982240	ENSGALG00000019261	273	472	267	367	437	309	269	396	3.55891	5.91528	3.91114	4.87123	4.56644	4.83897	4.5072	5.16053	9.3826	15.0799	9.72277	11.9515	12.0717	12.1025	11.5635	13.0849	12.1599	18.8517	12.2107	15.7361	13.7365	15.1492	13.8453	17.3087
PHF21B	1	complement(69994919..70038449)	ENSGALG00000014218	0	0	1	0	1	0	0	0	0	0	0.0187822	0	0.0133984	0	0	0	0	0	0.0466911	0	0.0354196	0	0	0	0	0	0.0457329	0	0.0314335	0	0	0
NUP50	1	70276350..70292392	ENSGALG00000014222	3684	4607	3422	3785	4509	3353	2742	4292	19.4958	23.4379	20.3488	20.3941	19.1268	21.3154	18.6504	22.7052	51.398	59.7503	50.5854	50.0365	50.5632	53.3111	47.8488	57.5709	164.091	184.004	156.498	162.292	141.734	164.386	141.13	187.599
KIAA0930	1	complement(70300882..70322771)	ENSGALG00000014226	230	250	186	225	340	192	214	248	8.74518	9.13819	7.94678	8.71048	10.3624	8.76965	10.4582	9.42623	23.0555	23.2961	19.7551	21.371	27.3939	21.9334	26.831	23.901	10.2446	9.985	8.50632	9.64749	10.6874	9.41312	11.0145	10.8398
UPK3A	1	70416011..70422094	ENSGALG00000014227	0	5	0	4	10	0	1	10	0	0.176557	0	0.149594	0.294427	0	0.0472101	0.367181	0	0.450097	0	0.367025	0.778339	0	0.121121	0.931017	0	0.1997	0	0.171511	0.314335	0	0.0514697	0.43709
SMC1B	1	complement(70455565..70491589)	ENSGALG00000014228	0	0	0	0	0	1	0	0	0	0	0	0	0	0.00939941	0	0	0	0	0	0	0	0.0235085	0	0	0	0	0	0	0	0.0490266	0	0
RIBC2	1	70491928..70505475	ENSGALG00000014232	4	3	1	7	10	3	4	6	0.102461	0.073875	0.0287829	0.182563	0.205324	0.0923121	0.131691	0.153636	0.270124	0.18833	0.071552	0.447915	0.542789	0.230878	0.337863	0.389557	0.178166	0.11982	0.0457329	0.300144	0.314335	0.14708	0.205879	0.262254
FBLN1	1	70545573..70627591	ENSGALG00000014233	3026	3959	2746	3581	4883	2665	2925	3239	23.2964	29.3011	23.7551	28.07	30.1334	24.6466	28.9431	24.9273	61.4179	74.6975	59.0533	68.869	79.6599	61.6425	74.2554	63.2052	134.783	158.122	125.583	153.545	153.49	130.656	150.549	141.573
ATXN10	1	70660407..70756330	ENSGALG00000014234	190	263	203	260	266	184	233	200	2.68031	3.5667	3.21785	3.73442	3.00785	3.1181	4.22462	2.82038	7.0663	9.09262	7.99931	9.16232	7.95147	7.79854	10.8385	7.15129	8.4629	10.5042	9.28378	11.1482	8.36132	9.0209	11.9924	8.74179
WNT7B	1	complement(70844240..70935921)	ENSGALG00000036255	2	0	0	1	0	0	0	0	0.0378255	0	0	0.0192563	0	0	0	0	0.0997221	0	0	0.0472449	0	0	0	0	0.0890832	0	0	0.0428777	0	0	0	0
CDPF1	1	complement(71252534..71391292)	ENSGALG00000028840	242	237	202	237	285	182	228	220	4.3116	4.0593	4.04401	4.29922	4.07015	3.89525	5.22105	3.91824	11.367	10.3484	10.0531	10.548	10.7597	9.74223	13.3949	9.93502	10.7791	9.46578	9.23805	10.162	8.95856	8.92285	11.7351	9.61597
PPARA	1	71331992..71363344	ENSGALG00000041470	703	805	499	638	906	676	637	1148	9.70157	10.6798	7.73792	8.96449	10.0221	11.2066	11.2986	15.837	25.5769	27.226	19.2359	21.9942	26.4941	28.0283	28.9874	40.1561	31.3127	32.1517	22.8207	27.356	28.4788	33.142	32.7862	50.1779
ENSGALG00000039133	1	complement(71396256..71396675)	ENSGALG00000039133	2	2	1	2	1	1	1	2	0.156996	0.150928	0.0882057	0.159848	0.0629219	0.0942974	0.100893	0.15694	0.4139	0.384761	0.219272	0.392184	0.166339	0.235843	0.258846	0.397935	0.0890832	0.07988	0.0457329	0.0857554	0.0314335	0.0490266	0.0514697	0.0874179
TTC38	1	71400742..71448774	ENSGALG00000014551	3546	3895	2226	3807	4949	2616	3040	4345	29.8926	31.5654	21.0856	32.6758	33.4414	26.4912	32.9381	36.615	78.8078	80.4698	52.4172	80.1692	88.4048	66.2561	84.5047	92.8404	157.945	155.566	101.802	163.235	155.565	128.254	156.468	189.915
ZC3HAV1	1	complement(71466683..71492236)	ENSGALG00000013911	1677	2142	1529	2036	2238	1827	1536	1923	12.5598	15.4222	12.8675	15.5255	13.4354	16.4372	14.7856	14.3971	33.1122	39.316	31.9876	38.0914	35.5175	41.1104	37.9335	36.5049	74.6963	85.5515	69.9257	87.299	70.3483	89.5717	79.0574	84.0523
ETV6	1	71540993..71673765	ENSGALG00000012921	1654	1712	1617	1706	2595	1614	1492	1711	8.84272	8.799	9.714	9.28641	11.1207	10.3656	10.2523	9.1442	23.3127	22.4314	24.1482	22.784	29.3983	25.9249	26.3028	23.1859	73.6718	68.3773	73.9501	73.1494	81.57	79.129	76.7928	74.786
BCL2L14	1	71724526..71731735	ENSGALG00000011544	1139	1453	1111	1420	1747	1120	806	1424	31.6765	38.847	34.7188	40.2087	38.9447	37.4172	28.8103	39.5884	83.5109	99.033	86.3081	98.651	102.953	93.5825	73.9147	100.38	50.7329	58.0328	50.8093	60.8864	54.9144	54.9098	41.4846	62.2416
LRP6	1	complement(71750243..71874216)	ENSGALG00000031503	403	327	220	239	469	288	299	379	2.24926	1.75453	1.37973	1.35816	2.09821	1.93093	2.14489	2.11455	5.92988	4.47284	3.4299	3.33221	5.54678	4.82937	5.50286	5.36162	17.9503	13.0604	10.0612	10.2478	14.7423	14.1197	15.3894	16.5657
MANSC1	1	complement(71890196..71896378)	ENSGALG00000038710	404	585	480	451	407	478	341	427	7.32753	10.2003	9.78262	8.32859	5.91716	10.4146	7.94934	7.74193	19.3181	26.0036	24.3188	20.434	15.6424	26.0476	20.3945	19.6303	17.9948	23.3649	21.9518	19.3379	12.7935	23.4347	17.5512	18.6637
BORCS5	1	71899126..71960632	ENSGALG00000040393	958	1261	982	1265	1512	960	880	1216	6.17683	7.81617	7.11457	8.30441	7.81437	7.43552	7.2926	7.83752	16.2844	19.9258	17.6863	20.3747	20.6579	18.5967	18.7096	19.8727	42.6709	50.3643	44.9097	54.2403	47.5275	47.0656	45.2933	53.1501
ENSGALG00000028155	1	complement(71965309..71994175)	ENSGALG00000028155	737	720	563	632	963	614	560	657	10.7877	10.1314	9.25987	9.41878	11.2987	10.7961	10.5353	9.61324	28.4402	25.8281	23.0193	23.1088	29.8689	27.0017	27.029	24.3752	32.8272	28.7568	25.7476	27.0987	30.2705	30.1024	28.823	28.7168
ENSGALG00000046318	1	72031798..72032382	ENSGALG00000046318	0	2	2	0	2	0	3	0	0	0.179952	0.210337	0	0.150045	0	0.360885	0	0	0.458753	0.52288	0	0.396654	0	0.925873	0	0	0.07988	0.0914659	0	0.0628671	0	0.154409	0
CREBL2	1	72050789..72060671	ENSGALG00000037030	391	616	448	670	963	575	542	480	6.82877	10.3425	8.79187	11.914	13.4814	12.0635	12.1665	8.38016	18.0032	26.3662	21.8559	29.2308	35.6391	30.1715	31.2139	21.2486	17.4158	24.603	20.4884	28.7281	30.2705	28.1903	27.8966	20.9803
GPR19	1	complement(72070708..72072923)	ENSGALG00000045619	0	0	0	0	1	0	0	0	0	0	0	0	0.0183153	0	0	0	0	0	0	0	0.0484178	0	0	0	0	0	0	0	0.0314335	0	0	0
ENSGALG00000026896	1	complement(72114118..72122785)	ENSGALG00000026896	217	241	339	279	474	310	424	387	3.99539	4.26575	7.01352	5.23024	6.99552	6.85648	10.0338	7.12287	10.5333	10.8747	17.4351	12.8323	18.4932	17.1484	25.7423	18.0606	9.66553	9.62554	15.5035	11.9629	14.8995	15.1983	21.8231	16.9154
CDKN1B	1	72191984..72195253	ENSGALG00000022980	1907	2411	2061	2340	4039	2375	2199	2188	28.6603	34.8342	34.8053	35.8066	48.657	42.8779	42.4771	32.8717	75.5591	88.8031	86.5231	87.8508	128.628	107.24	108.978	83.3488	84.9408	96.2953	94.2556	100.334	126.96	116.438	113.182	95.6352
MRPS35	1	72371014..72393128	ENSGALG00000036730	462	700	598	672	751	556	503	630	10.6564	15.5219	15.4991	15.7818	13.8852	15.4058	14.912	14.5263	28.0942	39.5702	38.5296	38.7203	36.7064	38.5307	38.2577	36.8325	20.5782	27.958	27.3483	28.8138	23.6066	27.2588	25.8892	27.5366
MANSC4	1	complement(72398826..72400355)	ENSGALG00000026372	0	2	0	0	0	0	1	0	0	0.0725388	0	0	0	0	0.048491	0	0	0.184924	0	0	0	0	0.124407	0	0	0.07988	0	0	0	0	0.0514697	0
KLHL42	1	72420206..72430748	ENSGALG00000017296	263	341	322	381	425	242	278	318	5.07933	6.33117	6.98785	7.49193	6.57933	5.61443	6.90073	6.13936	13.391	16.1401	17.3712	18.3813	17.393	14.042	17.7043	15.5668	11.7144	13.6195	14.726	16.3364	13.3593	11.8644	14.3086	13.8994
PTHLH	1	complement(72518738..72529849)	ENSGALG00000017295	32	41	30	35	47	27	30	24	0.399505	0.492079	0.420853	0.444896	0.47034	0.404926	0.481386	0.299522	1.05324	1.25446	1.04621	1.09154	1.24338	1.01274	1.23503	0.759462	1.42533	1.63754	1.37199	1.50072	1.47738	1.32372	1.54409	1.04901
CCDC91	1	72655626..72839254	ENSGALG00000031666	142	119	98	98	139	61	112	120	3.20695	2.58363	2.48695	2.25345	2.51629	1.65491	3.25104	2.70913	8.4547	6.58646	6.18236	5.52879	6.652	4.13902	8.34074	6.86922	6.32491	4.75286	4.48183	4.20202	4.36926	2.99063	5.7646	5.24507
FAR2	1	72973409..73086559	ENSGALG00000017291	1245	1097	1065	915	1535	971	1030	1380	22.007	18.6414	21.1534	16.4677	21.7492	20.6182	23.4007	24.3847	58.0187	47.5226	52.5855	40.403	57.4956	51.5674	60.036	61.8292	55.4543	43.8142	48.7056	39.2331	48.2505	47.6049	53.0138	60.3184
RAD51AP1	1	complement(73116109..73124781)	ENSGALG00000017290	182	263	241	202	365	201	235	211	3.58129	4.97512	5.32872	4.04705	5.7571	4.75121	5.94342	4.15046	9.44161	12.6831	13.2468	9.92933	15.2193	11.8831	15.2482	10.5238	8.10657	10.5042	11.0216	8.6613	11.4732	9.85436	12.0954	9.22259
C12orf4	1	73124893..73151338	ENSGALG00000017289	422	478	439	458	553	361	367	389	6.50631	7.08483	7.60544	7.18962	6.83423	6.68605	7.27258	5.99539	17.153	18.0614	18.9065	17.6396	18.0668	16.7222	18.6583	15.2018	18.7966	19.0913	20.0768	19.638	17.3827	17.6986	18.8894	17.0028
FGF6	1	73165296..73168929	ENSGALG00000017287	1	0	0	0	0	0	0	0	0.047023	0	0	0	0	0	0	0	0.12397	0	0	0	0	0	0	0	0.0445416	0	0	0	0	0	0	0
FGF23	1	73192230..73195635	ENSGALG00000027791	0	0	0	0	0	0	0	0	0	0	0	0	0	0	0	0	0	0	0	0	0	0	0	0	0	0	0	0	0	0	0	0
TIGAR	1	complement(73210025..73229458)	ENSGALG00000026776	147	250	223	276	331	304	120	158	2.20585	3.60644	3.76012	4.21684	3.98135	5.47991	2.31441	2.37007	5.81545	9.19392	9.34736	10.3459	10.525	13.7056	5.93777	6.00951	6.54762	9.985	10.1984	11.8342	10.4045	14.9041	6.17636	6.90601
CCND2	1	complement(73241231..73282113)	ENSGALG00000017283	346	408	352	293	498	354	289	326	4.39672	4.98415	5.02611	3.79086	5.07252	5.40376	4.72009	4.14109	11.5914	12.7061	12.4945	9.3008	13.4096	13.5151	12.1097	10.5001	15.4114	16.2955	16.098	12.5632	15.6539	17.3554	14.8747	14.2491
NDUFA9	1	73456333..73476274	ENSGALG00000017282	2462	2788	2407	2722	3019	1942	2195	2660	44.9054	48.8858	49.3315	50.5496	44.1384	42.5501	51.4571	48.4996	118.387	124.625	122.634	124.022	116.683	106.42	132.016	122.975	109.661	111.353	110.079	116.713	94.8979	95.2098	112.976	116.266
KCNA6	1	73505426..73507456	ENSGALG00000040681	10	1	5	2	7	5	10	7	0.184935	0.0177787	0.103903	0.037659	0.103767	0.111079	0.237695	0.129409	0.487558	0.0453233	0.258294	0.0923954	0.274317	0.277814	0.609822	0.328126	0.445416	0.03994	0.228665	0.0857554	0.220035	0.245133	0.514697	0.305963
KCNA1	1	73644812..73646287	ENSGALG00000017280	0	0	1	0	1	0	1	0	0	0	0.0222307	0	0.0158584	0	0.0254282	0	0	0	0.0552638	0	0.0419227	0	0.0652377	0	0	0	0.0457329	0	0.0314335	0	0.0514697	0
NTF3	1	73984538..74054787	ENSGALG00000027299	21	20	23	21	63	14	22	22	0.640781	0.586677	0.788598	0.652421	1.5409	0.513167	0.862806	0.671055	1.68934	1.49562	1.96039	1.6007	4.07347	1.28346	2.21358	1.70151	0.935374	0.7988	1.05186	0.900432	1.98031	0.686373	1.13233	0.961597
ANO2	1	complement(74112613..74296685)	ENSGALG00000017271	2	5	2	4	4	2	3	3	0.0186055	0.0447157	0.0209064	0.0378869	0.0298273	0.0223502	0.0358701	0.0278983	0.0490509	0.113994	0.0519715	0.0929547	0.0788506	0.0558991	0.0920269	0.0707383	0.0890832	0.1997	0.0914659	0.171511	0.125734	0.0980533	0.154409	0.131127
VWF	1	complement(74316620..74458552)	ENSGALG00000017272	3449	3202	2915	3975	5439	2809	3038	3210	11.0749	9.88434	10.5178	12.9958	13.9994	10.8353	12.5382	10.3038	29.1976	25.1982	26.1463	31.8849	37.0084	27.0996	32.1675	26.1261	153.624	127.888	133.311	170.439	170.967	137.716	156.365	140.306
CD9	1	74491375..74515119	ENSGALG00000017274	131	143	102	142	184	101	121	90	3.65365	3.83416	3.19664	4.03239	4.11354	3.3839	4.33752	2.50925	9.63237	9.77446	7.94658	9.89337	10.8744	8.46332	11.1282	6.3624	5.83495	5.71142	4.66476	6.08864	5.78377	4.95169	6.22783	3.93381
ENSGALG00000043916	1	complement(74531769..74536229)	ENSGALG00000043916	2	8	1	4	5	1	1	6	0.0664421	0.255495	0.0373294	0.135298	0.133145	0.0399074	0.0426986	0.199255	0.175166	0.651335	0.0927979	0.331951	0.351979	0.0998107	0.109546	0.505228	0.0890832	0.31952	0.0457329	0.171511	0.157168	0.0490266	0.0514697	0.262254
ENSGALG00000017276	1	complement(74544908..74556396)	ENSGALG00000017276	661	781	668	829	1025	671	558	878	11.1766	12.6952	12.6918	14.2719	13.8924	13.6293	12.1267	14.8405	29.4658	32.364	31.5508	35.0159	36.7255	34.0876	31.1119	37.6294	29.442	31.1931	30.5496	35.5456	32.2194	32.8969	28.7201	38.3765
PRMT8	1	75168825..75220639	ENSGALG00000013272	448	591	454	455	711	695	429	456	4.76756	6.04623	5.42889	4.93001	6.06499	8.88471	5.8678	4.85097	12.5691	15.4137	13.4958	12.0957	16.0333	22.2212	15.0542	12.3	19.9546	23.6045	20.7628	19.5094	22.3492	34.0735	22.0805	19.9313
ENSGALG00000040332	1	75333290..75335460	ENSGALG00000040332	0	0	0	0	0	0	0	0	0	0	0	0	0	0	0	0	0	0	0	0	0	0	0	0	0	0	0	0	0	0	0	0
ENSGALG00000014347	1	complement(75349718..75362957)	ENSGALG00000014347	546	828	729	771	1028	713	651	726	7.81181	11.3886	11.7199	11.2314	11.7895	12.2543	11.9713	10.3834	20.5948	29.0329	29.1348	27.5559	31.1664	30.6487	30.713	26.328	24.3197	33.0703	33.3393	33.0587	32.3137	34.956	33.5068	31.7327
TSPAN9	1	complement(75380490..75521578)	ENSGALG00000014346	346	346	267	256	438	238	222	297	6.81758	6.55404	5.91157	5.13585	6.91784	5.63341	5.62221	5.85	17.9737	16.7083	14.6957	12.6007	18.2878	14.0895	14.4241	14.8331	15.4114	13.8192	12.2107	10.9767	13.7679	11.6683	11.4263	12.9816
TEAD4	1	complement(75541939..75609141)	ENSGALG00000014342	257	288	262	262	417	257	247	263	3.94363	4.24849	4.51754	4.09339	5.12911	4.73736	4.87148	4.03427	10.3969	10.8307	11.2302	10.043	13.5592	11.8484	12.4981	10.2292	11.4472	11.5027	11.982	11.234	13.1078	12.5998	12.713	11.4955
ENSGALG00000040734	1	complement(75614332..75616362)	ENSGALG00000040734	63	87	0	0	185	0	0	0	0.905801	1.20252	0	0	2.13209	0	0	0	2.38803	3.06558	0	0	5.63635	0	0	0	2.80612	3.47478	0	0	5.8152	0	0	0
TULP3	1	complement(75620435..75637015)	ENSGALG00000013424	250	243	198	184	258	169	159	196	4.94602	4.62169	4.40168	3.7064	4.09146	4.01645	4.04309	3.8763	13.0395	11.7821	10.9422	9.09356	10.8161	10.0454	10.3728	9.82867	11.1354	9.70542	9.05512	7.8895	8.10985	8.2855	8.18368	8.56696
RHNO1	1	complement(75650184..75654385)	ENSGALG00000013422	13	25	24	27	32	8	17	17	0.335055	0.619429	0.695058	0.708524	0.661096	0.247687	0.563146	0.437992	0.883328	1.57911	1.72786	1.73835	1.74766	0.619478	1.44479	1.11056	0.579041	0.9985	1.09759	1.1577	1.00587	0.392213	0.874985	0.743052
FOXM1	1	75654527..75664722	ENSGALG00000013420	333	557	559	660	489	347	376	445	2.58824	4.16194	4.88214	5.22304	3.04658	3.23989	3.7562	3.45753	6.82357	10.6101	12.1366	12.8146	8.05385	8.10316	9.63677	8.76685	14.8324	22.2466	25.5647	28.2993	15.371	17.0122	19.3526	19.4505
ITFG2	1	complement(75703446..75717203)	ENSGALG00000014335	353	420	396	413	632	340	298	362	7.45341	8.52528	9.39534	8.87868	10.6964	8.62381	8.08717	7.64071	19.6499	21.7336	23.3561	21.7836	28.2768	21.5686	20.7481	19.3736	15.7232	16.7748	18.1102	17.7085	19.866	16.6691	15.338	15.8226
FKBP4	1	complement(75721961..75736104)	ENSGALG00000014331	3277	4513	2980	4488	4103	2955	2915	3746	38.5081	50.9824	39.3486	53.6966	38.6474	41.7132	44.0265	44.0037	101.522	129.97	97.8175	131.743	102.167	104.327	112.953	111.575	145.963	180.249	136.284	192.435	128.972	144.874	150.034	163.734
NECAP1	1	complement(75771764..75777768)	ENSGALG00000037656	1562	1516	1412	1401	1964	1123	1162	1640	32.2577	30.0975	32.7661	29.4584	32.5115	27.8595	30.8432	33.8565	85.0433	76.7279	81.4539	72.2755	85.9465	69.6781	79.1301	85.8459	69.574	60.549	64.5749	60.0717	61.7355	55.0569	59.8078	71.6827
FOXJ2	1	complement(75799694..75827289)	ENSGALG00000014329	566	535	541	472	866	540	475	576	9.24899	8.40447	9.93373	7.85304	11.3433	10.6001	9.97634	9.40904	24.3837	21.4256	24.6945	19.2673	29.9868	26.5116	25.5949	23.8574	25.2105	21.3679	24.7415	20.2383	27.2214	26.4744	24.4481	25.1764
SLC2A14	1	75871016..75879214	ENSGALG00000014324	247	190	245	238	338	183	161	164	4.23034	3.12832	4.715	4.15024	4.6402	3.76504	3.54408	2.80781	11.1527	7.97504	11.7211	10.1825	12.2667	9.41657	9.09257	7.11942	11.0018	7.5886	11.2046	10.2049	10.6245	8.97188	8.28662	7.16827
NANOG	1	complement(75915831..75918614)	ENSGALG00000027772	0	0	0	0	0	0	0	0	0	0	0	0	0	0	0	0	0	0	0	0	0	0	0	0	0	0	0	0	0	0	0	0
AICDA	1	complement(75956434..75960413)	ENSGALG00000014280	12	12	14	10	12	8	6	2	0.430486	0.413845	0.564343	0.365255	0.345065	0.344753	0.276649	0.0717221	1.13492	1.05502	1.40291	0.896145	0.912206	0.862247	0.70976	0.181857	0.534499	0.47928	0.640261	0.428777	0.377202	0.392213	0.308818	0.0874179
MFAP5	1	complement(75972581..75982809)	ENSGALG00000027471	117	85	51	89	105	34	197	66	7.49244	5.23282	3.66982	5.80291	5.38976	2.61551	16.2145	4.225	19.7528	13.3401	9.12288	14.2373	14.2482	6.54154	41.5993	10.7128	5.21137	3.3949	2.33238	3.81612	3.30052	1.66691	10.1395	2.88479
RIMKLB	1	76007742..76041101	ENSGALG00000040184	36	72	51	63	98	64	78	74	0.878235	1.68857	1.39803	1.56483	1.91636	1.87555	2.4457	1.80462	2.31535	4.30469	3.47538	3.83927	5.06603	4.69085	6.27459	4.57575	1.6035	2.87568	2.33238	2.7013	3.08049	3.13771	4.01463	3.23446
A2ML1	1	76082957..76112683	ENSGALG00000036447	21	49	31	41	48	41	18	26	0.13991	0.313838	0.232076	0.27812	0.256339	0.328137	0.154136	0.173161	0.368856	0.80007	0.576922	0.682362	0.677651	0.820689	0.395445	0.439063	0.935374	1.95706	1.41772	1.75799	1.50881	2.01009	0.926454	1.13643
ENSGALG00000014252	1	76146376..76177348	ENSGALG00000014252	5	14	15	14	17	3	16	11	0.0358915	0.0966114	0.12099	0.102322	0.0978166	0.0258692	0.147619	0.0789331	0.0946232	0.246292	0.300772	0.251044	0.258585	0.0647003	0.378725	0.200141	0.222708	0.55916	0.685994	0.600288	0.53437	0.14708	0.823515	0.480799
PHC1	1	76188197..76207347	ENSGALG00000014263	1021	1176	912	1012	1516	773	906	1167	7.32364	8.10938	7.35078	7.39095	8.71651	6.66071	8.35275	8.36791	19.3078	20.6733	18.2735	18.1335	23.0427	16.6588	21.4295	21.2175	45.477	46.9694	41.7084	43.3922	47.6532	37.8976	46.6315	51.0084
M6PR	1	complement(76208717..76214124)	ENSGALG00000031681	4267	4979	4402	5049	5959	4428	3668	4322	48.9788	54.9422	56.777	59.0077	54.8278	61.0566	54.1146	49.5924	129.126	140.065	141.143	144.774	144.941	152.706	138.834	125.746	190.059	198.861	201.316	216.49	187.312	217.09	188.791	188.91
ENSGALG00000039764	1	76230134..76257737	ENSGALG00000039764	382	495	22	357	138	1077	25	126	2.61852	3.26195	0.169454	2.49161	0.758253	8.86847	0.220259	0.863393	6.90339	8.31571	0.42125	6.1131	2.0045	22.1805	0.565087	2.1892	17.0149	19.7703	1.00612	15.3073	4.33783	52.8017	1.28674	5.50733
ENSGALG00000035614	1	complement(76263942..76266014)	ENSGALG00000035614	12	34	1	20	7	2	4	10	0.548381	1.49369	0.0513498	0.930571	0.256414	0.109792	0.234942	0.456822	1.44574	3.80787	0.127652	2.28314	0.67785	0.274597	0.602759	1.15831	0.534499	1.35796	0.0457329	0.857554	0.220035	0.0980533	0.205879	0.43709
ENSGALG00000031659	1	complement(76270315..76327369)	ENSGALG00000031659	1	0	0	0	3	2	0	0	0.00819341	0	0	0	0.0197028	0.019685	0	0	0.0216009	0	0	0	0.0520858	0.0492332	0	0	0.0445416	0	0	0	0.0943006	0.0980533	0	0
ENSGALG00000033736	1	76283034..76285106	ENSGALG00000033736	28	33	4	26	7	127	4	11	1.27956	1.44975	0.205399	1.20974	0.256414	6.97181	0.234942	0.502504	3.37338	3.69587	0.510606	2.96808	0.67785	17.4369	0.602759	1.27414	1.24716	1.31802	0.182932	1.11482	0.220035	6.22638	0.205879	0.480799
OVST	1	complement(76345584..76430119)	ENSGALG00000011930	21	27	17	19	43	18	16	13	0.066045	0.0816325	0.0600768	0.0608404	0.1084	0.0680038	0.0646756	0.0408704	0.174119	0.208106	0.149346	0.149271	0.286565	0.170081	0.165929	0.10363	0.935374	1.07838	0.77746	0.814677	1.35164	0.88248	0.823515	0.568216
ENSGALG00000014361	1	complement(76480754..76505020)	ENSGALG00000014361	373	346	266	339	399	288	246	373	15.4498	13.7774	12.3803	14.2965	13.2473	14.33	13.0963	15.4443	40.7313	35.1229	30.7765	35.0763	35.0203	35.8401	33.5994	39.1602	16.614	13.8192	12.165	14.5355	12.542	14.1197	12.6615	16.3034
ENSGALG00000041564	1	complement(76519123..76614559)	ENSGALG00000041564	553	528	408	449	633	413	392	606	12.7857	11.7358	10.5998	10.5697	11.7313	11.4707	11.6489	14.0061	33.7078	29.9181	26.3502	25.9326	31.0125	28.6888	29.886	35.5136	24.6315	21.0883	18.659	19.2521	19.8974	20.248	20.1761	26.4876
CD86	1	76641354..76652029	ENSGALG00000014362	28	11	17	11	24	19	4	4	0.560793	0.211795	0.382588	0.224314	0.385299	0.457129	0.102969	0.0800848	1.47846	0.539932	0.951083	0.550348	1.01857	1.1433	0.264172	0.203061	1.24716	0.43934	0.77746	0.471655	0.754405	0.931506	0.205879	0.174836
CASR	1	76721272..76762823	ENSGALG00000038405	173	169	137	107	284	124	160	148	1.58563	1.48909	1.41096	0.998524	2.08649	1.36527	1.88485	1.35601	4.18031	3.79616	3.50753	2.44986	5.5158	3.41462	4.8357	3.43828	7.7057	6.74986	6.26541	4.58792	8.92713	6.0793	8.23515	6.46893
CSTB	1	76767140..76771720	ENSGALG00000014410	1342	1486	1371	1822	1638	1347	1109	1378	31.2256	33.2396	35.8454	43.1644	30.5503	37.6501	33.1658	32.0518	82.3223	84.7381	89.1088	105.903	80.7619	94.1651	85.0889	81.27	59.7748	59.3508	62.6998	78.1232	51.4881	66.0389	57.0799	60.2309
CSTA	1	complement(76773166..76778171)	ENSGALG00000014412	387	413	258	448	271	207	235	392	26.7794	27.4738	20.0607	31.5636	15.0315	17.2068	20.9006	27.1157	70.6004	70.0392	49.8694	77.4405	39.7368	43.0352	53.6217	68.7541	17.2376	16.4952	11.7991	19.2092	8.51849	10.1485	12.0954	17.1339
CCDC58	1	complement(76787499..76796808)	ENSGALG00000014413	238	310	272	288	342	237	214	296	8.65493	10.8375	11.1146	10.6634	9.96908	10.3532	10.0023	10.7603	22.8176	27.628	27.63	26.1625	26.354	25.894	25.6616	27.2836	10.6009	12.3814	12.4394	12.3488	10.7503	11.6193	11.0145	12.9379
FAM162A	1	76796937..76805651	ENSGALG00000007378	866	993	770	726	1007	622	463	710	15.6197	17.218	15.6057	13.3325	14.5589	13.4768	10.7334	12.8014	41.1794	43.8941	38.7945	32.7109	38.4874	33.7062	27.5372	32.4591	38.573	39.6604	35.2144	31.1292	31.6536	30.4946	23.8305	31.0334
KPNA1	1	complement(76808272..76859608)	ENSGALG00000014426	1824	1706	1509	1440	2095	1296	1253	1568	11.7501	10.5651	10.923	9.4449	10.8179	10.0291	10.3745	10.0974	30.9776	26.9338	27.1538	23.1728	28.5979	25.0833	26.6165	25.6027	81.2439	68.1376	69.011	61.7439	65.8533	63.5385	64.4915	68.5356
FBXO40	1	76868927..76870807	ENSGALG00000013999	47	40	38	61	72	38	43	32	0.729645	0.59697	0.662879	0.964188	0.89596	0.708659	0.85799	0.496602	1.92361	1.52186	1.64786	2.36561	2.36854	1.7724	2.20123	1.25917	2.09346	1.5976	1.73785	2.61554	2.26321	1.86301	2.2132	1.39869
TAPBPL	1	76879713..76888332	ENSGALG00000014428	660	774	664	725	882	764	475	569	5.08519	5.73302	5.74868	5.68747	5.44721	7.07126	4.70389	4.38249	13.4064	14.6152	14.2908	13.9541	14.4001	17.6856	12.0681	11.1121	29.3975	30.9136	30.3667	31.0863	27.7244	37.4564	24.4481	24.8704
SCNN1A	1	76898999..76910211	ENSGALG00000040424	166	179	204	271	224	139	133	127	1.40627	1.45778	1.94191	2.33748	1.52108	1.41454	1.44815	1.0755	3.70745	3.71634	4.82743	5.73496	4.02108	3.53785	3.71531	2.72701	7.39391	7.14926	9.32952	11.6199	7.04111	6.8147	6.84547	5.55104
VAMP1	1	complement(76915077..76917933)	ENSGALG00000022955	49	38	43	46	82	42	58	43	1.63527	1.21915	1.6125	1.56304	2.19356	1.68377	2.48784	1.43452	4.31118	3.10799	4.00855	3.83489	5.79885	4.21121	6.38271	3.63735	2.18254	1.51772	1.96652	1.97237	2.57755	2.05912	2.98524	1.87949
MRPL51	1	complement(76919241..76920800)	ENSGALG00000014435	1110	1205	1212	1318	1539	921	1076	1160	22.8264	23.8221	28.0062	27.5961	25.3685	22.7517	28.4398	23.8461	60.1788	60.7299	69.6211	67.7064	67.0635	56.9033	72.964	60.4637	49.4412	48.1277	55.4283	56.5128	48.3762	45.1535	55.3814	50.7024
NCAPD2	1	76920908..76944751	ENSGALG00000039448	647	755	688	710	985	579	535	637	3.87633	4.34853	4.63172	4.33105	4.73037	4.16712	4.11975	3.81506	10.2194	11.0857	11.5141	10.6261	12.5051	10.4222	10.5695	9.67339	28.8184	30.1547	31.4643	30.4432	30.962	28.3864	27.5363	27.8426
CNP1	1	76949287..76951004	ENSGALG00000028638	2	15	4	3	22	12	3	2	0.150522	1.08528	0.338273	0.229885	1.3272	1.08491	0.290196	0.150469	0.396832	2.76671	0.840921	0.564017	3.50855	2.71341	0.744517	0.381525	0.0890832	0.5991	0.182932	0.128633	0.691538	0.58832	0.154409	0.0874179
GAPDH	1	76950864..76956805	ENSGALG00000014442	56507	54426	49690	62385	63151	47011	41030	59036	1033.24	956.716	1020.95	1161.44	925.593	1032.61	964.271	1079.09	2723.99	2438.96	2538	2849.56	2446.87	2582.62	2473.9	2736.13	2516.91	2173.77	2272.47	2674.93	1985.06	2304.79	2111.8	2580.4
IFFO1	1	complement(76967047..76970228)	ENSGALG00000014443	131	195	173	159	277	177	143	146	2.766	3.95816	4.10453	3.41818	4.68816	4.48945	3.88075	3.08161	7.29219	10.0906	10.2035	8.38644	12.3935	11.2284	9.95632	7.81368	5.83495	7.7883	7.9118	6.81756	8.70709	8.67772	7.36016	6.38151
NOP2	1	complement(76983184..76988376)	ENSGALG00000037807	911	941	760	939	1137	787	568	825	11.4963	11.4158	10.7768	12.0649	11.5012	11.9304	9.21271	10.4073	30.3084	29.1025	26.7903	29.6009	30.4042	29.8385	23.6358	26.3885	40.5774	37.5835	34.757	40.2622	35.7399	38.584	29.2348	36.0599
ENSGALG00000013565	1	complement(76988085..77010194)	ENSGALG00000013565	4437	4929	3746	4524	6414	3912	3647	4609	18.3626	19.6102	17.42	19.0627	21.2772	19.4483	19.399	19.0676	48.4105	49.9924	43.3048	46.7699	56.2479	48.6414	49.7694	48.3474	197.631	196.864	171.316	193.979	201.615	191.792	187.71	201.455
LPAR5	1	complement(77027981..77029234)	ENSGALG00000014455	1045	963	586	905	1237	884	500	769	28.8153	25.5277	18.1569	25.4082	27.3413	29.2819	17.7205	21.1972	75.9677	65.078	45.1366	62.3383	72.2786	73.2356	45.4631	53.7471	46.546	38.4622	26.7995	38.8043	38.8833	43.3396	25.7348	33.6122
ING4	1	complement(77069090..77083835)	ENSGALG00000014457	485	693	631	690	902	619	581	649	8.89613	12.22	13.0055	12.8863	13.262	13.6392	13.6973	11.9001	23.4535	31.1526	32.3306	31.6161	35.059	34.1125	35.1413	30.1736	21.6027	27.6784	28.8575	29.5856	28.3531	30.3475	29.9039	28.3671
ZNF384	1	complement(77089837..77115522)	ENSGALG00000032599	907	995	801	869	1366	856	792	957	4.529	4.77636	4.49433	4.41807	5.46749	5.13463	5.083	4.77697	11.9401	12.1764	11.1725	10.8396	14.4537	12.842	13.0408	12.1124	40.3992	39.7403	36.6321	37.2607	42.9382	41.9668	40.764	41.8295
PIANP	1	complement(77137687..77139302)	ENSGALG00000014466	8	3	8	6	16	6	6	3	0.272273	0.0981556	0.305944	0.207914	0.436493	0.245305	0.262462	0.102066	0.717813	0.250229	0.760553	0.510113	1.1539	0.613522	0.673362	0.258797	0.356333	0.11982	0.365863	0.257266	0.502937	0.29416	0.308818	0.131127
COPS7A	1	77151417..77154549	ENSGALG00000014467	3740	4008	3523	3673	4883	3565	3115	3784	72.8572	75.0598	77.1171	72.8517	76.2482	83.4258	77.9936	73.688	192.078	191.351	191.707	178.74	201.568	208.653	200.097	186.842	166.586	160.08	161.117	157.49	153.49	174.78	160.328	165.395
MLF2	1	complement(77165655..77172827)	ENSGALG00000014468	3623	3794	3381	3803	4688	3345	2979	3501	51.0847	51.4279	53.5679	54.5968	52.9849	56.6576	53.9874	49.3469	134.678	131.105	133.166	133.952	140.07	141.704	138.508	125.123	161.374	151.532	154.623	163.064	147.36	163.994	153.328	153.025
ENSGALG00000044449	1	77197103..77198831	ENSGALG00000044449	24	13	42	11	33	11	9	5	0.68709	0.357787	1.3511	0.320637	0.757283	0.378299	0.331165	0.143093	1.81142	0.912109	3.35874	0.786675	2.00193	0.946147	0.849625	0.362823	1.069	0.51922	1.92078	0.471655	1.03731	0.539293	0.463227	0.218545
CD4	1	77208503..77219967	ENSGALG00000014477	102	85	161	84	156	84	79	62	1.50128	1.2027	2.66271	1.2588	1.84047	1.48518	1.49447	0.912216	3.95792	3.06606	6.61928	3.08845	4.86541	3.71453	3.83416	2.313	4.54324	3.3949	7.363	3.60173	4.90363	4.11824	4.0661	2.70996
GPR162	1	77229605..77233181	ENSGALG00000022926	139	190	220	208	213	158	163	173	1.98192	2.60438	3.52478	3.01963	2.43441	2.70626	2.98717	2.46583	5.22509	6.63938	8.76233	7.4086	6.43555	6.76851	7.66377	6.25232	6.19128	7.5886	10.0612	8.91857	6.69534	7.74621	8.38956	7.56165
ENSGALG00000014490	1	77239261..77244825	ENSGALG00000014490	107	170	113	146	197	124	112	120	2.43534	3.71966	2.88996	3.38335	3.59405	3.39029	3.27638	2.73025	6.42045	9.48257	7.1842	8.30097	9.50114	8.47932	8.40575	6.92276	4.76595	6.7898	5.16782	6.26015	6.19241	6.0793	5.7646	5.24507
GNB3	1	77251364..77255432	ENSGALG00000034438	22	12	10	5	29	4	13	15	0.626149	0.328334	0.31981	0.144892	0.6616	0.136759	0.475552	0.426768	1.65076	0.837023	0.795023	0.355488	1.74899	0.342041	1.22006	1.0821	0.979915	0.47928	0.457329	0.214389	0.911573	0.196107	0.669106	0.655634
CDCA3	1	complement(77256837..77258980)	ENSGALG00000014513	125	192	182	218	250	120	116	159	3.31532	4.89548	5.42405	5.88694	5.31493	3.82328	3.95433	4.21558	8.7404	12.4801	13.4838	14.4435	14.0504	9.56225	10.1451	10.6889	5.5677	7.66848	8.32339	9.34734	7.85838	5.8832	5.97048	6.94972
USP5	1	77259347..77274052	ENSGALG00000014525	1939	2000	1565	2030	2827	2067	2121	1795	22.0488	21.8633	19.9967	23.5029	25.7677	28.235	30.999	20.4041	58.1288	55.7364	49.7103	57.6638	68.1188	70.6174	79.5299	51.7362	86.3662	79.88	71.572	87.0418	88.8626	101.338	109.167	78.4576
TPI1	1	77274752..77277757	ENSGALG00000014526	6935	8442	7028	8142	8493	6347	5377	6756	138.801	162.432	158.058	165.919	136.254	152.6	138.321	135.17	365.931	414.089	392.919	407.079	360.199	381.662	354.87	342.736	308.896	337.173	321.411	349.11	266.965	311.172	276.752	295.298
LRRC23	1	77279563..77286852	ENSGALG00000043468	21	17	21	16	23	10	15	28	0.786189	0.611837	0.883414	0.609882	0.690205	0.449726	0.72177	1.04788	2.07268	1.55976	2.1961	1.49633	1.82461	1.12479	1.85175	2.65698	0.935374	0.67898	0.960392	0.686043	0.722971	0.490266	0.772045	1.22385
ENO2	1	77287666..77296900	ENSGALG00000014528	90	172	327	145	247	152	56	139	1.15725	2.12614	4.72466	1.89833	2.5458	2.34784	0.925493	1.78667	3.05094	5.42019	11.7451	4.65751	6.73001	5.87209	2.37441	4.53025	4.00874	6.86968	14.9547	6.21727	7.76408	7.45205	2.8823	6.07554
ATN1	1	77317847..77325309	ENSGALG00000014554	411	493	387	361	802	381	475	375	3.35244	3.86585	3.54705	2.99809	5.24368	3.73323	4.97981	3.05771	8.83827	9.85525	8.81769	7.35575	13.862	9.33701	12.776	7.75306	18.3066	19.6904	17.6986	15.4789	25.2097	18.6792	24.4481	16.3909
C1H12ORF57	1	77325963..77327101	ENSGALG00000014555	1935	1789	1812	1804	2315	2142	1564	1899	57.3068	50.9348	60.3005	54.3977	54.9565	76.2053	59.5336	56.2206	151.082	129.849	149.902	133.463	145.281	190.594	152.737	142.552	86.188	71.4527	82.8681	77.3514	72.7686	105.015	80.4986	83.0033
PTPN6	1	77339324..77348760	ENSGALG00000014561	3710	4114	3547	3663	5988	3460	2925	3388	40.2889	42.9492	43.2823	40.5011	52.1238	45.1365	40.8261	36.779	106.216	109.491	107.596	99.3685	137.793	112.889	104.742	93.2562	165.249	164.313	162.215	157.061	188.224	169.632	150.549	148.086
PHB2	1	complement(77348875..77354569)	ENSGALG00000014567	5256	5627	4964	5680	6635	4790	3762	5414	100.644	103.583	106.807	110.739	101.839	110.181	92.5873	103.632	265.335	264.065	265.515	271.695	269.22	275.57	237.538	262.768	234.111	224.742	227.018	243.545	208.562	234.838	193.629	236.64
EMG1	1	77354660..77356911	ENSGALG00000014568	201	173	145	182	187	120	112	150	6.21765	5.14465	5.04006	5.73218	4.63676	4.45915	4.45296	4.63838	16.392	13.1153	12.5292	14.0638	12.2576	11.1526	11.4243	11.761	8.95286	6.90962	6.63127	7.80374	5.87807	5.8832	5.7646	6.55634
LPCAT3	1	complement(77357092..77372767)	ENSGALG00000014570	4144	4070	2664	3656	3725	3021	2166	3124	60.9623	57.5593	44.0366	54.7604	43.9249	53.3866	40.9544	45.9407	160.719	146.736	109.471	134.353	116.119	133.523	105.071	116.486	184.58	162.556	121.833	156.761	117.09	148.11	111.483	136.547
C1S	1	77379603..77388708	ENSGALG00000014603	1031	923	1215	971	1023	642	748	568	11.361	9.77771	15.0442	10.8942	9.03596	8.49829	10.594	6.25677	29.9517	24.9264	37.3988	26.7286	23.8872	21.2547	27.1794	15.8645	45.9224	36.8646	55.5655	41.6343	32.1565	31.4751	38.4993	24.8267
ENSGALG00000014659	1	complement(77392527..77399415)	ENSGALG00000014659	410	382	507	377	517	362	356	256	5.59726	5.01342	7.77744	5.24024	5.6575	5.93663	6.24657	3.49363	14.7564	12.7807	19.3341	12.8568	14.956	14.8479	16.026	8.85838	18.2621	15.2571	23.1866	16.1649	16.2511	17.7476	18.3232	11.1895
RBP5	1	complement(77404113..77405744)	ENSGALG00000014662	671	729	671	572	934	536	469	484	26.4071	27.5807	29.6728	22.9199	29.4637	25.3398	23.7231	19.041	69.6189	70.3116	73.7642	56.2335	77.8895	63.3763	60.8631	48.2799	29.8874	29.1163	30.6868	24.5261	29.3589	26.2783	24.1393	21.1551
CLSTN3	1	77405765..77420676	ENSGALG00000014674	265	307	279	266	412	171	259	225	2.48741	2.77025	2.94269	2.54216	3.09986	1.92814	3.12465	2.1112	6.55774	7.06223	7.31528	6.23712	8.1947	4.82239	8.0165	5.35313	11.8035	12.2616	12.7595	11.4055	12.9506	8.38356	13.3306	9.83451
ENSGALG00000014680	1	complement(77422388..77430336)	ENSGALG00000014680	51	66	43	46	110	47	47	52	1.31445	1.63529	1.24531	1.20711	2.27252	1.45516	1.55693	1.33974	3.46536	4.16886	3.09575	2.96163	6.00757	3.63943	3.99441	3.39702	2.27162	2.63604	1.96652	1.97237	3.45769	2.30425	2.41907	2.27287
PEX5	1	77434366..77444965	ENSGALG00000014683	1166	1375	1152	1379	1954	1125	1034	1253	11.8595	13.4447	13.1662	14.2808	15.9307	13.7455	13.5173	12.7399	31.2661	34.2747	32.73	35.0375	42.1141	34.3784	34.6795	32.303	51.9355	54.9175	52.6843	59.1284	61.4211	55.155	53.2196	54.7673
ENSGALG00000014685	1	77485688..77486689	ENSGALG00000014685	0	1	0	0	0	1	0	0	0	0.0280165	0	0	0	0.0350086	0	0	0	0.0714226	0	0	0	0.0875585	0	0	0	0.03994	0	0	0	0.0490266	0	0
EPHA1	1	77496575..77530024	ENSGALG00000014687	2836	3582	2464	2693	4706	3196	2176	3329	21.2237	25.7703	20.7202	20.5196	28.2299	28.7317	20.9302	24.9043	55.9535	65.6965	51.5087	50.3445	74.6278	71.8597	53.6978	63.1468	126.32	143.065	112.686	115.47	147.926	156.689	111.998	145.507
ZYX	1	complement(77535094..77546510)	ENSGALG00000014688	4209	5404	3997	3936	5853	4026	3586	4073	45.4039	56.0413	48.4491	43.2302	50.6098	52.1709	49.7192	43.9211	119.701	142.867	120.441	106.064	133.791	130.482	127.558	111.366	187.476	215.836	182.795	168.767	183.981	197.381	184.57	178.027
FAM131B	1	77586269..77592786	ENSGALG00000014689	57	36	32	37	51	36	28	36	0.960458	0.583157	0.605886	0.634781	0.688837	0.728696	0.606404	0.606389	2.53212	1.48665	1.50618	1.55742	1.82099	1.82251	1.55577	1.53755	2.53887	1.43784	1.46345	1.58648	1.60311	1.76496	1.44115	1.57352
CLCN1	1	complement(77610132..77667963)	ENSGALG00000014695	176	193	33	37	122	19	21	102	1.78825	1.88518	0.376762	0.382768	0.993614	0.231905	0.274243	1.036	4.71449	4.80589	0.9366	0.939112	2.62669	0.580006	0.703586	2.62687	7.83932	7.70842	1.50919	1.58648	3.83489	0.931506	1.08086	4.45831
CASP2	1	complement(77671018..77697005)	ENSGALG00000014698	989	1071	885	960	1218	762	713	808	6.16701	6.42017	6.20096	6.09492	6.0879	5.70786	5.71436	5.03657	16.2585	16.367	15.4151	14.9537	16.0938	14.2757	14.6606	12.7706	44.0516	42.7757	40.4736	41.1626	38.2861	37.3583	36.6979	35.3168
RAP1GAP1	1	77714268..77753043	ENSGALG00000014701	107	150	167	141	216	150	139	103	1.20128	1.61895	2.10676	1.61176	1.94383	2.02299	2.00575	1.15596	3.16703	4.12719	5.23725	3.95441	5.13866	5.05961	5.14588	2.93104	4.76595	5.991	7.6374	6.04576	6.78964	7.354	7.15429	4.50202
GSTK1	1	complement(77760262..77770624)	ENSGALG00000014708	2600	3267	2499	2616	3326	2084	1895	2632	42.5818	51.4374	45.9891	43.6221	43.6632	41.0005	39.8896	43.0906	112.261	131.13	114.325	107.026	115.427	102.544	102.339	109.26	115.808	130.484	114.287	112.168	104.548	102.172	97.535	115.042
ENSGALG00000030506	1	complement(77815472..77816407)	ENSGALG00000030506	0	0	0	0	0	0	0	0	0	0	0	0	0	0	0	0	0	0	0	0	0	0	0	0	0	0	0	0	0	0	0	0
KEL	1	77862437..77876315	ENSGALG00000014736	1	0	3	3	22	0	11	13	0.0116433	0	0.0392494	0.0355643	0.205324	0	0.164614	0.151308	0.0306959	0	0.097571	0.0872562	0.542789	0	0.422328	0.383655	0.0445416	0	0.137199	0.128633	0.691538	0	0.566166	0.568216
ENSGALG00000014746	1	77904803..77933908	ENSGALG00000014746	0	0	0	0	0	0	0	0	0	0	0	0	0	0	0	0	0	0	0	0	0	0	0	0	0	0	0	0	0	0	0	0
EPHB6	1	complement(77978178..78032477)	ENSGALG00000014749	112	152	140	126	196	91	111	94	0.883931	1.15325	1.24155	1.01249	1.23994	0.862744	1.12596	0.741607	2.33037	2.93999	3.08641	2.48411	3.27786	2.15777	2.88872	1.8804	4.98866	6.07088	6.40261	5.40259	6.16097	4.46143	5.71313	4.10864
ENSGALG00000014750	1	78071368..78073633	ENSGALG00000014750	125	92	159	86	150	104	88	55	2.12342	1.50243	3.03502	1.48745	2.04249	2.12227	1.92136	0.933973	5.59813	3.83015	7.54481	3.64943	5.39947	5.30791	4.92937	2.36816	5.5677	3.67448	7.27154	3.68748	4.71503	5.09877	4.52933	2.40399
ENSGALG00000014754	1	complement(78077450..78225862)	ENSGALG00000014754	300	225	343	228	447	243	195	130	3.98562	2.87367	5.12043	3.0841	4.76019	3.87812	3.32973	1.72649	10.5076	7.32586	12.729	7.56676	12.5839	9.69939	8.54263	4.37765	13.3625	8.9865	15.6864	9.77612	14.0508	11.9135	10.0366	5.68216
PRSS2	1	complement(78102283..78137310)	ENSGALG00000032796	2	0	0	1	2	0	8	0	0.0236066	0	0	0.0120177	0.0189223	0	0.121365	0	0.0622356	0	0	0.0294851	0.0500226	0	0.311369	0	0.0890832	0	0	0.0428777	0.0628671	0	0.411757	0
ENSGALG00000027291	1	78146304..78159531	ENSGALG00000027291	0	0	1	0	0	0	1	0	0	0	0.0335164	0	0	0	0.0383371	0	0	0	0.083319	0	0	0	0.0983563	0	0	0	0.0457329	0	0	0	0.0514697	0
ENSGALG00000030650	1	78168762..78171942	ENSGALG00000030650	0	0	1	0	0	0	1	0	0	0	0.0479715	0	0	0	0.0548714	0	0	0	0.119253	0	0	0	0.140776	0	0	0	0.0457329	0	0	0	0.0514697	0
ENSGALG00000034771	1	78183774..78186301	ENSGALG00000034771	0	0	0	0	0	0	0	0	0	0	0	0	0	0	0	0	0	0	0	0	0	0	0	0	0	0	0	0	0	0	0	0
ENSGALG00000040609	1	78216893..78220222	ENSGALG00000040609	0	3	0	2	2	6	0	0	0	0.112741	0	0.0796031	0.0626692	0.281756	0	0	0	0.287412	0	0.195304	0.165671	0.704688	0	0	0	0.11982	0	0.0857554	0.0628671	0.29416	0	0
YBX3	1	78318610..78343166	ENSGALG00000031890	3332	4220	4966	3410	5142	3574	3397	3364	65.8759	80.2072	110.323	68.6427	81.4885	84.8822	86.3212	66.4849	173.673	204.473	274.254	168.413	215.421	212.295	221.462	168.578	148.413	168.547	227.11	146.213	161.631	175.221	174.842	147.037
SYCE3	1	complement(78348231..78351850)	ENSGALG00000042936	49	32	31	49	59	51	46	46	1.29373	0.812225	0.9197	1.31723	1.24865	1.61755	1.56101	1.21409	3.41075	2.07061	2.2863	3.23179	3.3009	4.04558	4.00486	3.07842	2.18254	1.27808	1.41772	2.10101	1.85458	2.50036	2.36761	2.01061
STYK1	1	78365923..78371775	ENSGALG00000014759	2421	2887	2298	2581	3358	2626	2001	2877	57.6642	66.1055	61.5034	62.5919	64.1113	75.1358	61.2575	68.501	152.024	168.523	152.893	153.568	169.483	187.919	157.16	173.69	107.835	115.307	105.094	110.667	105.554	128.744	102.991	125.751
GABARAPL1	1	complement(78391093..78400942)	ENSGALG00000014723	1891	1875	1551	1743	2124	1471	1418	1869	46.836	44.6446	43.1656	43.9546	42.1682	43.7664	45.1403	46.2746	123.477	113.813	107.306	107.842	111.475	109.462	115.81	117.333	84.2282	74.8875	70.9318	74.7359	66.7648	72.1182	72.984	81.692
TMEM52B	1	complement(78408167..78412651)	ENSGALG00000034698	0	0	0	0	0	0	0	0	0	0	0	0	0	0	0	0	0	0	0	0	0	0	0	0	0	0	0	0	0	0	0	0
KLRD1	1	complement(78423927..78430724)	ENSGALG00000014722	2	0	0	1	0	0	0	2	0.0643201	0	0	0.0327442	0	0	0	0.0642971	0.169571	0	0	0.0803372	0	0	0	0.163031	0.0890832	0	0	0.0428777	0	0	0	0.0874179
HSD3B1	1	complement(78465927..78476335)	ENSGALG00000037951	2	3	4	5	2	0	6	5	0.0214637	0.030951	0.048236	0.0546339	0.0172047	0	0.0827609	0.05364	0.0565861	0.0789035	0.119911	0.134043	0.0454818	0	0.212328	0.136009	0.0890832	0.11982	0.182932	0.214389	0.0628671	0	0.308818	0.218545
HAO2	1	complement(78483489..78493943)	ENSGALG00000014766	11	5	9	1	5	4	1	9	0.287826	0.125773	0.264617	0.0266414	0.10487	0.12573	0.0336309	0.23541	0.758817	0.320634	0.657817	0.065364	0.277231	0.314457	0.0862821	0.596902	0.489958	0.1997	0.411596	0.0428777	0.157168	0.196107	0.0514697	0.393381
WARS2	1	78585938..78637352	ENSGALG00000014772	106	72	66	69	105	66	67	76	2.52681	1.64998	1.76786	1.67469	2.00631	1.88995	2.05277	1.81103	6.6616	4.2063	4.39475	4.10881	5.30383	4.72687	5.26652	4.59201	4.72141	2.87568	3.01837	2.95856	3.30052	3.23576	3.44847	3.32188
ENSGALG00000037173	1	78660153..78714130	ENSGALG00000037173	0	0	0	0	0	0	1	0	0	0	0	0	0	0	0.089362	0	0	0	0	0	0	0	0.229264	0	0	0	0	0	0	0	0.0514697	0
TBX15	1	78721445..78734784	ENSGALG00000014776	0	0	0	0	0	0	2	0	0	0	0	0	0	0	0.111206	0	0	0	0	0	0	0	0.285306	0	0	0	0	0	0	0	0.102939	0
ENSGALG00000035228	1	78962706..79001440	ENSGALG00000035228	6	4	6	1	7	11	0	0	0.0627535	0.0402185	0.070514	0.0106489	0.058685	0.138204	0	0	0.165441	0.102529	0.175292	0.0261269	0.155138	0.345655	0	0	0.26725	0.15976	0.274398	0.0428777	0.220035	0.539293	0	0
ENSGALG00000043190	1	79034542..79047592	ENSGALG00000043190	1	6	4	7	12	12	4	0	0.0235875	0.136054	0.106018	0.168112	0.226885	0.340019	0.121267	0	0.0621853	0.346844	0.263552	0.412458	0.599787	0.850407	0.311117	0	0.0445416	0.23964	0.182932	0.300144	0.377202	0.58832	0.205879	0
WDR3	1	complement(79048613..79119285)	ENSGALG00000014791	701	720	649	700	959	687	533	680	5.08827	5.02416	5.29339	5.17331	5.57973	5.99031	4.97255	4.93408	13.4146	12.8081	13.159	12.6926	14.7504	14.9821	12.7574	12.5108	31.2237	28.7568	29.6807	30.0144	30.1448	33.6813	27.4333	29.7221
GDAP2	1	79119339..79141165	ENSGALG00000014794	590	729	546	643	773	505	543	494	7.36902	8.75315	7.6628	8.17687	7.73891	7.57686	8.71681	6.1678	19.4275	22.3145	19.0491	20.0618	20.4584	18.9502	22.3635	15.6389	26.2795	29.1163	24.9702	27.5704	24.2981	24.7585	27.948	21.5922
FAM46C	1	complement(79165447..79170009)	ENSGALG00000014453	164	120	248	127	193	69	71	68	2.3568	1.65783	4.00468	1.85823	2.2232	1.19115	1.31141	0.976861	6.21339	4.22631	9.95531	4.55914	5.87719	2.97914	3.36449	2.47691	7.30482	4.7928	11.3418	5.44547	6.06667	3.38284	3.65435	2.97221
DUSP12	1	79177407..79181322	ENSGALG00000007084	230	267	244	234	265	200	171	190	5.2024	5.80586	6.20159	5.38903	4.80468	5.43433	4.97133	4.2961	13.7155	14.8009	15.4167	13.2218	12.7015	13.5916	12.7542	10.8931	10.2446	10.664	11.1588	10.0334	8.32989	9.80533	8.80131	8.3047
ATP6V1A	1	complement(79181779..79210181)	ENSGALG00000014800	2778	2968	2833	3065	3493	2509	2299	2920	19.4956	20.0238	22.3403	21.9005	19.6492	21.1517	20.7369	20.4848	51.3976	51.0469	55.5361	53.7323	51.9442	52.9016	53.2018	51.941	123.737	118.542	129.561	131.42	109.797	123.008	118.329	127.63
NAA50	1	79210234..79230427	ENSGALG00000033889	2548	2672	2478	2783	3257	2064	2116	2644	20.0229	20.1856	21.8809	22.2668	20.5157	19.4839	21.3719	20.7698	52.7876	51.4594	54.3942	54.6311	54.2348	48.7304	54.8308	52.6636	113.492	106.72	113.326	119.329	102.379	101.191	108.91	115.566
USF3	1	79232533..79256355	ENSGALG00000031560	976	654	507	510	778	493	528	863	4.17896	2.692	2.43929	2.22334	2.67018	2.53574	2.90571	3.6938	11.0173	6.86273	6.06388	5.45492	7.05881	6.34203	7.45477	9.36594	43.4726	26.1208	23.1866	21.8676	24.4553	24.1701	27.176	37.7208
SIDT1	1	complement(79266799..79305988)	ENSGALG00000014812	445	371	486	459	798	309	364	374	5.30175	4.24925	6.50628	5.56788	7.62086	4.4224	5.57392	4.45426	13.9774	10.8326	16.1741	13.6607	20.1463	11.0607	14.3002	11.2941	19.821	14.8177	22.2262	19.6809	25.084	15.1492	18.735	16.3471
SPICE1	1	79311286..79342286	ENSGALG00000045606	414	576	536	505	783	451	419	487	4.54316	6.07658	6.60936	5.64244	6.8875	5.9453	5.90978	5.34234	11.9774	15.4911	16.4303	13.8436	18.2076	14.8695	15.1619	13.5459	18.4402	23.0054	24.5129	21.6532	24.6125	22.111	21.5658	21.2863
TRIM45	1	79344205..79362567	ENSGALG00000014818	37	33	57	42	62	41	37	42	0.759809	0.651472	1.31527	0.878153	1.02056	1.01141	0.976572	0.862179	2.00314	1.6608	3.26966	2.15453	2.69791	2.52959	2.50546	2.18612	1.64804	1.31802	2.60678	1.80086	1.94888	2.01009	1.90438	1.83578
ENSGALG00000014820	1	79368582..79376086	ENSGALG00000014820	0	0	0	0	1	1	0	0	0	0	0	0	0.0276678	0.0414641	0	0	0	0	0	0	0.0731418	0.103704	0	0	0	0	0	0	0.0314335	0.0490266	0	0
CTC1	1	complement(79378276..79392110)	ENSGALG00000032036	156	189	158	203	304	168	148	138	1.29784	1.5116	1.47703	1.71953	2.02727	1.67898	1.58255	1.14768	3.42158	3.85353	3.67178	4.21883	5.35923	4.19922	4.06013	2.91003	6.94849	7.54866	7.2258	8.70418	9.5558	8.23648	7.61751	6.03184
TNFRSF1A	1	79396754..79409687	ENSGALG00000039461	2276	2302	2024	2339	3370	1935	1679	2505	24.5248	23.8461	24.5065	25.6615	29.1075	25.0469	23.2533	26.9827	64.6564	60.791	60.9211	62.9598	76.9479	62.6437	59.6577	68.4169	101.377	91.9419	92.5635	100.291	105.931	94.8666	86.4176	109.491
METTL16	1	79411367..79422324	ENSGALG00000014901	650	754	658	692	988	649	590	734	8.40604	9.37408	9.56184	9.11177	10.2418	10.0824	9.80687	9.48898	22.1614	23.8974	23.77	22.3555	27.075	25.2166	25.1601	24.0601	28.952	30.1148	30.0923	29.6714	31.0563	31.8183	30.3671	32.0824
POLQ	1	79422423..79478850	ENSGALG00000014924	182	234	192	196	295	128	124	152	0.677715	0.837665	0.803367	0.743104	0.880521	0.572566	0.593468	0.565802	1.78671	2.13547	1.99711	1.82319	2.32772	1.43202	1.52258	1.43464	8.10657	9.34596	8.78072	8.40403	9.27289	6.27541	6.38224	6.64376
STXBP5L	1	complement(79487334..79673494)	ENSGALG00000032361	29	32	29	17	54	22	30	23	0.232456	0.246588	0.261203	0.138743	0.34696	0.211839	0.309075	0.184296	0.61284	0.628629	0.64933	0.340402	0.917214	0.529821	0.792952	0.467298	1.29171	1.27808	1.32625	0.728921	1.69741	1.07859	1.54409	1.00531
GTF2E1	1	complement(79717852..79762511)	ENSGALG00000042320	356	388	336	334	459	336	308	317	7.83987	8.21428	8.31449	7.48899	8.1024	8.8887	8.71785	6.97852	20.6688	20.9407	20.6691	18.3741	21.4193	22.2311	22.3662	17.6946	15.8568	15.4967	15.3663	14.3212	14.428	16.473	15.8527	13.8557
RABL3	1	79769736..79782706	ENSGALG00000014949	698	1002	795	922	1106	760	602	778	4.8004	6.62474	6.14365	6.45612	6.09705	6.27879	5.32131	5.34869	12.6556	16.8885	15.2726	15.8399	16.118	15.7036	13.6522	13.562	31.09	40.0199	36.3577	39.5333	34.7655	37.2603	30.9847	34.0056
HGD	1	79795007..79813272	ENSGALG00000014966	1	2	1	0	2	0	1	2	0.0173302	0.0333205	0.0194733	0	0.0277827	0	0.0222742	0.034648	0.0456887	0.0849442	0.0484091	0	0.0734457	0	0.0571459	0.0878527	0.0445416	0.07988	0.0457329	0	0.0628671	0	0.0514697	0.0874179
NDUFB4	1	complement(79815948..79819439)	ENSGALG00000027688	2093	2305	1958	2285	2675	1866	1676	2062	52.3273	55.4	55.0059	58.1653	53.6075	56.0417	53.8559	51.5339	137.954	141.232	136.74	142.707	141.715	140.163	138.171	130.668	93.2256	92.0617	89.5451	97.9756	84.0847	91.4837	86.2632	90.1279
FSTL1	1	79864143..79907705	ENSGALG00000014970	5814	6449	5256	6242	7894	4323	5800	4716	40.8018	43.5087	41.4474	44.6012	44.4062	36.4443	52.3158	33.0844	107.569	110.917	103.035	109.428	117.391	91.1493	134.219	83.8882	258.965	257.573	240.372	267.643	248.136	211.942	298.524	206.131
LRRC58	1	79909273..79920291	ENSGALG00000033186	1022	796	519	768	956	818	610	977	26.8862	20.1313	15.3421	20.5712	20.1595	25.8507	20.6257	25.6933	70.8821	51.3208	38.1392	50.4709	53.2931	64.6541	52.9166	65.1473	45.5215	31.7922	23.7354	32.9301	30.0505	40.1038	31.3965	42.7036
ENSGALG00000014973	1	79937492..79945119	ENSGALG00000014973	155	143	102	107	105	147	147	94	1.97478	1.75147	1.46024	1.388	1.07231	2.24981	2.40716	1.19718	5.20626	4.46504	3.63005	3.40543	2.83472	5.62689	6.17572	3.03556	6.90395	5.71142	4.66476	4.58792	3.30052	7.20692	7.56604	4.10864
GSK3B	1	80014156..80099885	ENSGALG00000014977	1159	1184	1020	1004	1440	1009	964	1236	26.6281	26.151	26.3326	23.486	26.5193	27.8476	28.4665	28.3871	70.2015	66.6668	65.4608	57.6223	70.1057	69.6485	73.0325	71.9777	51.6237	47.289	46.6476	43.0492	45.2643	49.4679	49.6168	54.0243
MAATS1	1	complement(80119877..80140301)	ENSGALG00000014980	6	10	10	8	20	11	9	9	0.110611	0.177225	0.20715	0.15016	0.295542	0.243602	0.21325	0.165857	0.291612	0.451802	0.514958	0.368415	0.781288	0.609261	0.547107	0.420545	0.26725	0.3994	0.457329	0.343022	0.628671	0.539293	0.463227	0.393381
COX17	1	80152053..80153980	ENSGALG00000014981	1103	1346	1251	1263	1552	1130	888	1190	61.5852	72.2478	78.4865	71.7996	69.46	75.7913	63.7256	66.4191	162.361	184.182	195.111	176.159	183.623	189.558	163.492	168.411	49.1294	53.7592	57.2119	54.1546	48.7849	55.4001	45.7051	52.0137
POPDC2	1	80157753..80167519	ENSGALG00000014988	404	522	567	540	640	376	393	424	5.96729	7.41217	9.41057	8.12097	7.57736	6.6715	7.46085	6.26047	15.732	18.8959	23.3939	19.9246	20.0313	16.6858	19.1413	15.8739	17.9948	20.8487	25.9306	23.154	20.1175	18.434	20.2276	18.5326
PLA1A	1	complement(80169358..80186176)	ENSGALG00000014997	13	8	12	10	22	19	12	10	0.276891	0.163808	0.287199	0.216862	0.375604	0.486137	0.328508	0.212917	0.729986	0.417596	0.713955	0.532066	0.992936	1.21586	0.842808	0.539868	0.579041	0.31952	0.548795	0.428777	0.691538	0.931506	0.617636	0.43709
ATP1A1	1	complement(80243655..80267671)	ENSGALG00000032247	87014	87081	69209	90316	93526	83061	65802	95632	681.578	655.736	609.153	720.293	587.22	781.562	662.469	748.816	1796.89	1671.67	1514.31	1767.22	1552.36	1954.73	1699.61	1898.68	3875.74	3478.02	3165.13	3872.54	2939.85	4072.2	3386.81	4179.97
MAB21L3	1	complement(80302817..80325374)	ENSGALG00000015006	46	30	37	50	81	42	33	34	1.35683	0.850682	1.22633	1.5016	1.91511	1.48818	1.25107	1.00252	3.5771	2.16865	3.04855	3.68415	5.06274	3.72203	3.20969	2.54196	2.04891	1.1982	1.69212	2.14389	2.54612	2.05912	1.6985	1.4861
SLC22A15	1	complement(80343674..80374483)	ENSGALG00000015016	201	133	148	94	252	123	114	208	3.57676	2.27523	2.95933	1.7031	3.59448	2.62929	2.60735	3.7	9.42966	5.80025	7.35665	4.17851	9.50229	6.57601	6.68931	9.38166	8.95286	5.31202	6.76847	4.03051	7.92125	6.03028	5.86754	9.09146
CASQ2	1	80446094..80476861	ENSGALG00000015018	0	0	0	0	0	0	1	0	0	0	0	0	0	0	0.0179579	0	0	0	0	0	0	0	0.0460722	0	0	0	0	0	0	0	0.0514697	0
VANGL1	1	complement(80489951..80519172)	ENSGALG00000015025	261	294	264	208	375	212	175	254	4.85758	5.26024	5.52104	3.9415	5.59439	4.73975	4.18618	4.72561	12.8064	13.41	13.7249	9.67037	14.7892	11.8544	10.7399	11.9822	11.6254	11.7424	12.0735	8.91857	11.7876	10.3936	9.00719	11.1021
CHD1L	1	complement(80531090..80538489)	ENSGALG00000015038	211	312	250	236	323	276	219	225	3.87027	5.50165	5.15272	4.40747	4.74902	6.08147	5.16301	4.1256	10.2035	14.0254	12.8093	10.8136	12.5544	15.2101	13.246	10.4608	9.39828	12.4613	11.4332	10.1191	10.153	13.5314	11.2719	9.83451
ENSGALG00000015059	1	80553123..80569333	ENSGALG00000015059	632	725	640	481	898	726	519	674	9.62212	10.6114	10.9489	7.45619	10.959	13.2779	10.156	10.2579	25.3675	27.0516	27.2181	18.2936	28.971	33.2089	26.0558	26.0098	28.1503	28.9565	29.2691	20.6242	28.2273	35.5933	26.7128	29.4598
TMEM39A	1	complement(80571770..80596941)	ENSGALG00000015073	1314	1346	1130	1016	1573	1077	998	1179	20.1209	19.8142	19.4432	15.8403	19.3074	19.811	19.6418	18.0472	53.0461	50.5124	48.3342	38.8638	51.0404	49.5486	50.3924	45.7602	58.5277	53.7592	51.6782	43.5638	49.445	52.8017	51.3667	51.5329
B4GALT4	1	80596007..80621096	ENSGALG00000015069	1281	1342	1265	1387	1599	1073	900	1288	17.0496	17.1711	18.9188	18.7958	17.0591	17.1556	15.396	17.1367	44.9491	43.7743	47.0306	46.115	45.097	42.9071	39.4994	43.4514	57.0578	53.5995	57.8522	59.4714	50.2622	52.6056	46.3227	56.2971
ENSGALG00000022891	1	complement(80621913..80636463)	ENSGALG00000022891	200	201	154	206	258	156	169	144	2.91867	2.81988	2.5253	3.06084	3.01799	2.73476	3.16987	2.10069	7.6947	7.18874	6.2777	7.5097	7.97827	6.8398	8.13251	5.32648	8.90832	8.02794	7.04287	8.83281	8.10985	7.64816	8.69838	6.29409
B3GAT1L	1	complement(80638660..80648642)	ENSGALG00000015075	28	39	59	53	108	52	65	56	0.195326	0.261545	0.462479	0.376441	0.603906	0.435759	0.582796	0.390514	0.514953	0.666759	1.14969	0.92359	1.59647	1.08986	1.4952	0.990179	1.24716	1.55766	2.69824	2.27252	3.39482	2.54939	3.34553	2.4477
ARHGAP31	1	80711561..80764144	ENSGALG00000015077	340	278	228	250	394	207	278	276	2.22411	1.74824	1.67591	1.66509	2.06594	1.62663	2.33735	1.80481	5.86359	4.45681	4.16617	4.08525	5.46145	4.06829	5.99661	4.57625	15.1441	11.1033	10.4271	10.7194	12.3848	10.1485	14.3086	12.0637
UPK1B	1	complement(80776274..80787066)	ENSGALG00000015079	6	1	0	3	2	2	0	0	0.134259	0.0215115	0	0.0683489	0.0358727	0.0537603	0	0	0.353956	0.0548394	0	0.167692	0.0948322	0.134458	0	0	0.26725	0.03994	0	0.128633	0.0628671	0.0980533	0	0
ENSGALG00000019240	1	complement(80801522..80803077)	ENSGALG00000019240	0	0	0	0	0	0	0	0	0	0	0	0	0	0	0	0	0	0	0	0	0	0	0	0	0	0	0	0	0	0	0	0
IGSF11	1	80838584..80925257	ENSGALG00000015084	4	11	6	5	15	12	7	5	0.0553842	0.146419	0.09335	0.0704878	0.166479	0.199594	0.124573	0.0692056	0.146013	0.373267	0.232061	0.17294	0.440099	0.499195	0.3196	0.175476	0.178166	0.43934	0.274398	0.214389	0.471503	0.58832	0.360288	0.218545
LSAMP	1	81944958..82236106	ENSGALG00000040620	37	55	49	52	117	37	43	48	0.485595	0.693927	0.722613	0.694855	1.23084	0.58333	0.725339	0.629736	1.28021	1.76903	1.79636	1.70481	3.25381	1.45894	1.8609	1.59675	1.64804	2.1967	2.24091	2.22964	3.67772	1.81399	2.2132	2.09803
GAP43	1	complement(82260425..82313641)	ENSGALG00000015089	30	51	54	58	102	40	41	37	0.872549	1.42599	1.76482	1.71757	2.378	1.39755	1.53268	1.07576	2.30036	3.6353	4.38719	4.21402	6.28641	3.49536	3.9322	2.72768	1.33625	2.03694	2.46958	2.48691	3.20622	1.96107	2.11026	1.61723
ZBTB20	1	82904583..82931844	ENSGALG00000015094	220	45	52	53	78	48	46	135	2.88602	0.567504	0.76651	0.707899	0.820189	0.756412	0.775595	1.77034	7.60862	1.44674	1.90548	1.73681	2.16823	1.89183	1.98984	4.48883	9.79915	1.7973	2.37811	2.27252	2.45182	2.35328	2.36761	5.90071
DRD3	1	82979190..82989119	ENSGALG00000015117	8	8	5	8	10	2	6	3	0.146098	0.14045	0.102603	0.148752	0.146385	0.0438757	0.140833	0.0547672	0.385168	0.358051	0.255064	0.364959	0.386979	0.109736	0.361316	0.138867	0.356333	0.31952	0.228665	0.343022	0.314335	0.0980533	0.308818	0.131127
QTRT2	1	complement(83004266..83022158)	ENSGALG00000037485	699	854	807	920	1118	769	595	712	7.86882	9.24207	10.2081	10.5448	10.0883	10.3992	8.60893	8.01231	20.7451	23.5609	25.3764	25.8714	26.6691	26.0089	22.0868	20.3158	31.1346	34.1088	36.9065	39.4475	35.1427	37.7015	30.6245	31.1208
ZDHHC23	1	complement(83045334..83052578)	ENSGALG00000015123	1911	2030	1567	1832	2491	1628	1409	1871	9.74057	9.94715	8.9749	9.50752	10.1775	9.96823	9.2307	9.53328	25.6797	25.3583	22.3109	23.3265	26.9049	24.9311	23.6819	24.1724	85.119	81.0782	71.6635	78.552	78.3009	79.8154	72.5208	81.7795
GRAMD1C	1	complement(83053390..83104742)	ENSGALG00000035629	1776	1887	1749	2102	2345	1608	1384	2017	22.5583	23.0417	24.9626	27.1841	23.8753	24.5352	22.5943	25.6103	59.472	58.7403	62.0551	66.6955	63.1161	61.3639	57.9672	64.9369	79.1059	75.3668	79.9869	90.129	73.7117	78.8349	71.234	88.161
ENSGALG00000046548	1	83108718..83116269	ENSGALG00000046548	3	5	0	8	6	2	2	1	0.126962	0.203424	0	0.344716	0.203539	0.101677	0.108789	0.0423057	0.334719	0.51859	0	0.845753	0.538069	0.2543	0.279104	0.107269	0.133625	0.1997	0	0.343022	0.188601	0.0980533	0.102939	0.043709
ENSGALG00000019233	1	complement(83118686..83141202)	ENSGALG00000019233	357	416	574	502	642	344	312	387	8.26059	9.2537	14.9242	11.8267	11.9075	9.56184	9.27892	8.95157	21.778	23.5905	37.1005	29.0166	31.4783	23.9147	23.8057	22.6974	15.9014	16.615	26.2507	21.5246	20.1803	16.8652	16.0585	16.9154
CLDND1	1	complement(83174245..83183465)	ENSGALG00000039538	1432	1692	1609	1642	2155	1397	1450	1446	18.1415	20.6068	22.9047	21.1798	21.8837	21.2602	23.6102	18.3124	47.8278	52.5331	56.9393	51.9643	57.8512	53.173	60.5734	46.4325	63.7836	67.5785	73.5843	70.4052	67.7393	68.4902	74.631	63.2031
ENSGALG00000015133	1	83190347..83191432	ENSGALG00000015133	50	50	85	51	92	47	20	39	1.34444	1.29247	2.5682	1.39624	1.98291	1.51814	0.691198	1.04829	3.54445	3.29491	6.38434	3.42565	5.24197	3.79694	1.77331	2.65803	2.22708	1.997	3.8873	2.18676	2.89189	2.30425	1.02939	1.70465
APOV1	1	complement(83204422..83207367)	ENSGALG00000015134	0	0	0	0	3	0	0	0	0	0	0	0	0.102214	0	0	0	0	0	0	0	0.27021	0	0	0	0	0	0	0	0.0943006	0	0	0
ILDR1	1	complement(83212638..83226401)	ENSGALG00000015136	636	601	483	619	936	627	462	750	11.1745	10.1514	9.53577	11.0734	13.1822	13.2336	10.4331	13.1728	29.4601	25.879	23.7052	27.1683	34.8482	33.0981	26.7668	33.4007	28.3285	24.0039	22.089	26.5413	29.4218	30.7397	23.779	32.7817
CFAP44	1	83251977..83271788	ENSGALG00000042577	43	53	45	75	77	39	54	46	0.402454	0.476873	0.473258	0.714706	0.577671	0.438483	0.649593	0.430379	1.06102	1.2157	1.17648	1.75351	1.52712	1.09667	1.66657	1.09126	1.91529	2.11682	2.05798	3.21583	2.42038	1.91204	2.77936	2.01061
ENSGALG00000035338	1	83255170..83428864	ENSGALG00000035338	27	12	5	4	13	9	8	10	0.281283	0.120182	0.0585311	0.0424285	0.108559	0.112632	0.10712	0.104142	0.741565	0.306381	0.145504	0.104097	0.286983	0.281699	0.274822	0.264059	1.20262	0.47928	0.228665	0.171511	0.408636	0.44124	0.411757	0.43709
BOC	1	complement(83273631..83292347)	ENSGALG00000015152	518	785	581	610	1058	537	576	562	4.55885	6.64163	5.74565	5.46606	7.4637	5.67728	6.51551	4.94433	12.0188	16.9316	14.2832	13.4108	19.7308	14.1992	16.7159	12.5367	23.0725	31.3529	26.5708	26.1554	33.2567	26.3273	29.6465	24.5644
ENSGALG00000043905	1	complement(83377413..83381837)	ENSGALG00000043905	1	0	1	1	0	2	0	0	0.0529009	0	0.059443	0.0538619	0	0.127096	0	0	0.139466	0	0.14777	0.132149	0	0.317875	0	0	0.0445416	0	0.0457329	0.0428777	0	0.0980533	0	0
ENSGALG00000015172	1	complement(83382155..83390596)	ENSGALG00000015172	2	1	0	1	0	1	1	0	0.0483465	0.0232388	0	0.0246124	0	0.0290386	0.0310696	0	0.127459	0.0592429	0	0.0603859	0	0.0726272	0.079711	0	0.0890832	0.03994	0	0.0428777	0	0.0490266	0.0514697	0
NEPRO	1	83391805..83397209	ENSGALG00000015182	271	323	219	249	336	171	167	236	5.01175	5.74251	4.55095	4.68854	4.98083	3.79889	3.96951	4.36292	13.2128	14.6394	11.3133	11.5032	13.1672	9.50123	10.184	11.0625	12.0708	12.9006	10.0155	10.6766	10.5617	8.38356	8.59544	10.3153
TAF13	1	complement(83397226..83400500)	ENSGALG00000015185	1040	1300	1050	1145	1406	1011	828	1069	16.7232	20.096	18.972	18.7461	18.1223	19.5289	17.1126	17.1834	44.0886	51.2308	47.1629	45.9931	47.9077	48.8429	43.9035	43.5699	46.3233	51.922	48.0196	49.095	44.1956	49.5659	42.6169	46.7249
GTPBP8	1	complement(83402391..83406149)	ENSGALG00000015190	338	345	294	385	464	325	251	300	6.3229	6.20437	6.17994	7.33294	6.9576	7.30336	6.03494	5.61004	16.6695	15.8168	15.3628	17.9912	18.3929	18.2661	15.483	14.2247	15.0551	13.7793	13.4455	16.5079	14.5852	15.9337	12.9189	13.1127
ENSGALG00000015191	1	83409648..83412396	ENSGALG00000015191	14	48	13	10	11	6	10	19	0.530244	1.74771	0.553259	0.385626	0.333951	0.272985	0.486797	0.719361	1.39792	4.45544	1.37536	0.946124	0.882825	0.682752	1.24891	1.824	0.623582	1.91712	0.594528	0.428777	0.345769	0.29416	0.514697	0.83047
CD200R1	1	83437067..83457590	ENSGALG00000019231	240	154	156	224	342	221	151	134	7.76114	4.78756	5.66861	7.37532	8.86509	8.58513	6.27612	4.33176	20.4612	12.205	14.0917	18.0952	23.4355	21.4719	16.1018	10.9835	10.69	6.15076	7.13434	9.60461	10.7503	10.8349	7.77192	5.857
CCDC80	1	83535298..83558902	ENSGALG00000015193	1498	1897	1510	1801	2833	1563	2259	1258	7.78494	9.47741	8.81774	9.52961	11.8014	9.75759	15.089	6.53535	20.524	24.1608	21.9202	23.3807	31.1978	24.4043	38.7117	16.5709	66.7233	75.7662	69.0567	77.2228	89.0512	76.6287	116.27	54.9859
ENSGALG00000035304	1	complement(83535604..83537535)	ENSGALG00000035304	0	2	0	0	0	0	0	1	0	0.155958	0	0	0	0	0	0.0810858	0	0.397586	0	0	0	0	0	0.2056	0	0.07988	0	0	0	0	0	0.043709
ENSGALG00000015197	1	complement(83565683..83566741)	ENSGALG00000015197	179	270	172	231	289	187	168	224	5.29588	7.67941	5.71809	6.9585	6.8537	6.6461	6.38843	6.62489	13.9619	19.5772	14.2147	17.0725	18.1183	16.6223	16.3899	16.7979	7.97295	10.7838	7.86606	9.90475	9.08429	9.16798	8.64691	9.79081
ENSGALG00000030754	1	complement(83570845..83574766)	ENSGALG00000030754	59	67	44	54	71	45	45	68	1.40528	1.53414	1.17761	1.30956	1.35554	1.28755	1.3776	1.61907	3.70485	3.911	2.92745	3.21296	3.58347	3.22024	3.53433	4.10529	2.62795	2.67598	2.01225	2.3154	2.23178	2.2062	2.31614	2.97221
ATG3	1	83574965..83598582	ENSGALG00000015204	775	956	891	939	1104	721	823	814	13.1729	15.6213	17.0174	16.2504	15.0415	14.7216	17.9796	13.8308	34.7286	39.8234	42.304	39.8699	39.7633	36.8195	46.1277	35.0692	34.5197	38.1826	40.748	40.2622	34.7026	35.3482	42.3595	35.5791
F5	1	83605465..83640498	ENSGALG00000029298	283	202	119	196	264	133	181	239	1.28422	0.88122	0.606789	0.905583	0.960285	0.725013	1.05568	1.08417	3.38568	2.2465	1.50843	2.22183	2.53858	1.8133	2.70841	2.749	12.6053	8.06788	5.44222	8.40403	8.29845	6.52054	9.31601	10.4464
SLC19A2	1	83652332..83662208	ENSGALG00000015218	17	34	3	7	11	10	7	34	0.371018	0.713352	0.0735707	0.155547	0.192434	0.262172	0.196356	0.741772	0.978141	1.81855	0.182891	0.381632	0.508713	0.655707	0.503764	1.88082	0.757207	1.35796	0.137199	0.300144	0.345769	0.490266	0.360288	1.4861
CCDC181	1	83669942..83676311	ENSGALG00000015221	3	8	6	6	5	3	10	6	0.0536789	0.13761	0.120634	0.109308	0.0717124	0.0644828	0.229976	0.107319	0.141517	0.350811	0.299887	0.268185	0.189577	0.161275	0.590017	0.272117	0.133625	0.31952	0.274398	0.257266	0.157168	0.14708	0.514697	0.262254
BLZF1	1	complement(83677123..83683799)	ENSGALG00000015225	763	949	861	951	1110	777	723	797	8.99499	10.7553	11.4056	11.415	10.4892	11.0037	10.9551	9.39247	23.7141	27.4185	28.3533	28.0064	27.7289	27.5208	28.1059	23.8154	33.9852	37.9031	39.3761	40.7767	34.8912	38.0937	37.2126	34.836
NME7	1	83683837..83773394	ENSGALG00000015230	226	270	255	323	372	180	240	199	4.63773	5.32648	5.87997	6.74867	6.11903	4.43721	6.33007	4.08221	12.2268	13.5788	14.6171	16.5577	16.1761	11.0977	16.2402	10.3508	10.0664	10.7838	11.6619	13.8495	11.6933	8.8248	12.3527	8.69808
ATP1B1	1	complement(83773214..83787119)	ENSGALG00000015233	35971	41298	39815	35611	52362	38873	29317	38810	483.832	534.011	601.764	487.691	564.548	628.103	506.83	521.833	1275.56	1361.36	1495.94	1196.54	1492.43	1570.92	1300.3	1323.15	1602.21	1649.44	1820.86	1526.92	1645.92	1905.81	1508.94	1696.34
DPT	1	83908116..83934219	ENSGALG00000039376	1543	2451	2414	1797	2816	1713	1831	1759	54.6153	83.4009	96.0114	64.7612	79.8957	72.836	83.2984	62.2385	143.986	212.615	238.677	158.89	211.21	182.167	213.707	157.811	68.7277	97.8929	110.399	77.0513	88.5168	83.9826	94.241	76.8841
XCL1	1	83995536..83999551	ENSGALG00000015235	481	374	370	394	608	399	276	360	15.5892	11.6527	13.4746	13.0015	15.7951	15.5343	11.4971	11.6634	41.0988	29.7064	33.4968	31.8988	41.7556	38.8521	29.4964	29.5735	21.4245	14.9376	16.9212	16.8938	19.1116	19.5616	14.2056	15.7352
TBX19	1	complement(84082887..84097141)	ENSGALG00000015244	68	62	43	95	68	21	53	42	1.16258	1.01903	0.826076	1.6537	0.931892	0.431294	1.16464	0.717809	3.06499	2.59781	2.05356	4.05731	2.46353	1.07869	2.98795	1.82006	3.02883	2.47628	1.96652	4.07338	2.13748	1.02956	2.72789	1.83578
SFT2D2	1	complement(84106232..84112786)	ENSGALG00000019228	878	708	704	704	844	471	660	919	21.6361	16.7724	19.4937	17.6634	16.6713	13.9426	20.9039	22.6383	57.0407	42.7581	48.4597	43.3368	44.0717	34.8713	53.6303	57.4013	39.1075	28.2775	32.196	30.1859	26.5299	23.0916	33.97	40.1685
TIPRL	1	complement(84114102..84122596)	ENSGALG00000015246	1184	1122	1169	1496	1723	1099	1008	1308	17.9235	16.3283	19.8848	23.0579	20.9073	19.9852	19.6124	19.7935	47.2529	41.626	49.4321	56.5721	55.27	49.984	50.3168	50.1881	52.7373	44.8127	53.4618	64.1451	54.16	53.8803	51.8814	57.1713
ENSGALG00000046343	1	complement(84122767..84123930)	ENSGALG00000046343	1	6	3	5	5	1	8	2	0.025087	0.144704	0.0845684	0.127714	0.100545	0.0301363	0.257952	0.0501562	0.0661387	0.368894	0.21023	0.313343	0.265799	0.0753725	0.661793	0.127175	0.0445416	0.23964	0.137199	0.214389	0.157168	0.0490266	0.411757	0.0874179
GPR161	1	84123865..84132371	ENSGALG00000015247	83	137	97	99	142	91	87	81	1.49889	2.37844	1.96835	1.82031	2.05553	1.97412	2.01935	1.46225	3.95163	6.06337	4.89315	4.46609	5.43394	4.93739	5.18077	3.70766	3.69695	5.47178	4.43609	4.24489	4.46356	4.46143	4.47786	3.54043
TTF2	1	84135950..84154902	ENSGALG00000015249	283	341	377	348	546	265	287	310	2.33643	2.70645	3.4974	2.92526	3.61329	2.62817	3.04543	2.55843	6.15971	6.89958	8.69427	7.17706	9.55199	6.5732	7.81325	6.48711	12.6053	13.6195	17.2413	14.9214	17.1627	12.9921	14.7718	13.5498
CPOX	1	complement(84160973..84169419)	ENSGALG00000015240	1586	2139	1310	1566	2098	1634	1086	1890	29.4053	38.1252	27.2917	29.5619	31.1795	36.3927	25.8792	35.0291	77.5231	97.1927	67.845	72.5294	82.4254	91.0201	66.3948	88.8191	70.643	85.4317	59.9101	67.1465	65.9476	80.1095	55.8961	82.6099
ST3GAL6	1	84210321..84252641	ENSGALG00000015252	242	246	265	285	428	249	280	235	2.768	2.70499	3.40592	3.31906	3.92408	3.4213	4.11632	2.68698	7.29748	6.89585	8.46685	8.14323	10.3736	8.55686	10.5607	6.81306	10.7791	9.82524	12.1192	12.2201	13.4536	12.2076	14.4115	10.2716
COL8A1	1	complement(84257313..84344008)	ENSGALG00000015253	68	137	109	168	229	53	130	102	0.479403	0.928521	0.863487	1.20592	1.29411	0.448857	1.17797	0.718849	1.26388	2.36709	2.14656	2.95871	3.42107	1.12262	3.02217	1.8227	3.02883	5.47178	4.98489	7.20346	7.19828	2.59841	6.69106	4.45831
DCBLD2	1	84531130..84573579	ENSGALG00000015258	1144	1380	1212	1222	1721	1063	1177	1108	6.66792	7.73255	7.93788	7.25194	8.04059	7.44283	8.81741	6.45579	17.5791	19.7126	19.7329	17.7925	21.2559	18.6149	22.6216	16.3692	50.9556	55.1172	55.4283	52.3966	54.0971	52.1153	60.5798	48.4295
ENSGALG00000015263	1	complement(84584803..84592547)	ENSGALG00000015263	661	558	559	654	699	415	412	644	17.5314	14.2275	16.6596	17.6608	14.8605	13.2222	14.0447	17.0744	46.2192	36.2702	41.4144	43.3304	39.2849	33.0694	36.0325	43.2936	29.442	22.2865	25.5647	28.042	21.972	20.3461	21.2055	28.1486
CMSS1	1	complement(84593673..84663511)	ENSGALG00000015267	83	150	115	140	160	94	115	93	2.05923	3.57764	3.20598	3.53649	3.18191	2.80152	3.66711	2.3065	5.42888	9.12049	7.96981	8.67669	8.41162	7.00676	9.40819	5.84832	3.69695	5.991	5.25929	6.00288	5.02937	4.6085	5.91901	4.06493
ENSGALG00000015271	1	84737375..84814326	ENSGALG00000015271	1732	3254	2271	2962	4727	3014	2555	2377	14.179	25.6092	20.8907	24.6889	31.019	29.6403	26.8838	19.4524	37.3812	65.2857	51.9327	60.5738	82.0009	74.1321	68.972	49.3232	77.1461	129.965	103.859	127.004	148.586	147.766	131.505	103.896
TBC1D23	1	84819684..84850825	ENSGALG00000015273	1785	2297	1761	2142	2680	1764	1705	2043	12.3752	15.3093	13.7186	15.12	14.8933	14.691	15.1928	14.1588	32.6256	39.028	34.1034	37.0966	39.3716	36.7431	38.9781	35.9009	79.5068	91.7422	80.5357	91.8441	84.2419	86.483	87.7558	89.2974
NIT2	1	84851126..84858913	ENSGALG00000015275	813	1129	753	1057	1400	741	677	1126	15.6808	20.9339	16.3196	20.7572	21.6445	17.1686	16.7828	21.71	41.3403	53.3669	40.5692	50.9274	57.2187	42.9396	43.0574	55.0475	36.2123	45.0923	34.4369	45.3217	44.007	36.3287	34.845	49.2163
TOMM70	1	complement(84863238..84884366)	ENSGALG00000015285	1234	1396	1009	1223	1442	971	843	1485	20.1535	21.9179	18.5167	20.3367	18.8774	19.05	17.6955	24.2441	53.132	55.8755	46.031	49.8955	49.9038	47.645	45.3989	61.4729	54.9643	55.7562	46.1445	52.4394	45.3272	47.6049	43.3889	64.9078
LNP1	1	84887143..84895943	ENSGALG00000015287	8	9	7	6	3	0	1	4	0.405574	0.438633	0.398763	0.309706	0.121911	0	0.0651598	0.202715	1.06924	1.11821	0.991294	0.759856	0.322281	0	0.167172	0.513999	0.356333	0.35946	0.320131	0.257266	0.0943006	0	0.0514697	0.174836
TMEM45A	1	84910507..84928051	ENSGALG00000015293	55	88	41	37	61	59	41	62	1.33395	2.05181	1.11737	0.913684	1.1859	1.71897	1.27808	1.50319	3.51678	5.2307	2.77769	2.2417	3.13501	4.29924	3.27901	3.81145	2.44979	3.51472	1.87505	1.58648	1.91745	2.89257	2.11026	2.70996
ADGRG7	1	84937803..84959755	ENSGALG00000015294	917	1419	971	1573	1294	883	801	1239	11.385	16.9366	13.5463	19.8844	12.8778	13.1694	12.782	15.3773	30.0152	43.1766	33.6751	48.7859	34.0434	32.9374	32.7929	38.9905	40.8446	56.6749	44.4067	67.4466	40.675	43.2905	41.2272	54.1554
TFG	1	84962541..84981080	ENSGALG00000015299	2359	2772	1932	2232	3054	2251	1795	2546	37.581	42.4534	34.5847	36.2036	38.9988	43.078	36.754	40.5456	99.0773	108.227	85.9749	88.8248	103.096	107.741	94.2946	102.807	105.074	110.714	88.356	95.7031	95.998	110.359	92.3881	111.283
ABI3BP	1	complement(84985337..85117095)	ENSGALG00000015307	620	879	583	670	926	674	773	518	4.12222	5.61834	4.35558	4.53558	4.93507	5.38319	6.60571	3.44282	10.8677	14.3229	10.8276	11.1279	13.0462	13.4637	16.9474	8.72956	27.6158	35.1073	26.6623	28.7281	29.1075	33.044	39.7861	22.6412
IMPG2	1	complement(85206272..85256440)	ENSGALG00000015322	82	166	182	327	408	111	168	219	0.487779	0.949285	1.21652	1.9805	1.94541	0.793181	1.28445	1.30226	1.28597	2.42002	3.02416	4.85912	5.14284	1.98379	3.29535	3.30199	3.65241	6.63004	8.32339	14.021	12.8249	5.44196	8.64691	9.57226
SENP7	1	complement(85260937..85295806)	ENSGALG00000044642	312	391	322	297	509	319	351	327	2.89232	3.48456	3.35417	2.80328	3.78226	3.55241	4.18214	3.03029	7.62522	8.88321	8.3382	6.87778	9.9987	8.88477	10.7295	7.68355	13.897	15.6165	14.726	12.7347	15.9997	15.6395	18.0659	14.2928
ENSGALG00000015324	1	85302361..85303125	ENSGALG00000015324	1	3	1	4	4	4	2	1	0.0381716	0.110088	0.0428922	0.15546	0.122389	0.183418	0.098123	0.038158	0.100635	0.280649	0.106627	0.381418	0.323545	0.458738	0.251741	0.0967528	0.0445416	0.11982	0.0457329	0.171511	0.125734	0.196107	0.102939	0.043709
TXNL4B	1	complement(85304025..85310280)	ENSGALG00000015327	273	244	249	245	339	243	224	250	3.43175	2.94864	3.51714	3.13572	3.41582	3.66944	3.6191	3.14151	9.04736	7.51699	8.74333	7.69342	9.02998	9.17747	9.28504	7.96555	12.1599	9.74536	11.3875	10.505	10.656	11.9135	11.5292	10.9272
TRMT10C	1	85306272..85309277	ENSGALG00000015328	492	714	492	677	731	462	468	537	9.29304	12.9649	10.4423	13.0197	11.0676	10.4827	11.3616	10.1394	24.4999	33.0516	25.9587	31.9434	29.258	26.2179	29.1488	25.7093	21.9145	28.5172	22.5006	29.0282	22.9779	22.6503	24.0878	23.4717
PCNP	1	85310442..85319996	ENSGALG00000015330	1511	2078	1628	1869	2336	1480	1502	1555	20.9214	27.6599	25.329	26.3483	25.9263	24.6166	26.7298	21.5229	55.1565	70.5135	62.9658	64.6451	68.5382	61.5674	68.577	54.5731	67.3024	82.9953	74.4532	80.1385	73.4287	72.5594	77.3075	67.9674
ZBTB11	1	complement(85325461..85337113)	ENSGALG00000015334	561	540	433	470	757	440	436	541	5.98755	5.54063	5.19292	5.10743	6.47626	5.6413	5.98099	5.77203	15.7854	14.1248	12.9092	12.531	17.1205	14.1092	15.3446	14.6354	24.9878	21.5676	19.8024	20.1525	23.7952	21.5717	22.4408	23.6465
RPL24	1	complement(85342917..85347383)	ENSGALG00000015339	9036	9087	8917	9599	12052	8011	7564	8952	266.528	257.672	295.545	288.278	284.95	283.853	286.76	263.957	702.667	656.884	734.701	707.283	753.286	709.933	735.701	669.283	402.478	362.935	407.801	411.583	378.837	392.752	389.317	391.283
CEP97	1	85347660..85359894	ENSGALG00000015342	122	126	120	119	217	117	127	146	1.47701	1.46647	1.63246	1.46687	2.10585	1.70157	1.97619	1.76695	3.89396	3.7385	4.05817	3.59892	5.56697	4.25573	5.07004	4.48023	5.43408	5.03244	5.48795	5.10245	6.82108	5.73612	6.53665	6.38151
NXPE3	1	85369265..85387136	ENSGALG00000015344	902	841	692	966	1439	981	795	1208	7.74693	6.94382	6.67831	8.44732	9.90664	10.1212	8.77588	10.3714	20.4238	17.7019	16.6018	20.7253	26.1889	25.3137	22.5151	26.2974	40.1765	33.5895	31.6472	41.4199	45.2329	48.0951	40.9184	52.8004
NFKBIZ	1	85395266..85411616	ENSGALG00000015346	1531	2275	2131	1874	2144	1474	1750	1483	13.227	18.895	20.6874	16.4844	14.8475	15.2976	19.4323	12.8077	34.8712	48.1691	51.4273	40.4441	39.2504	38.2602	49.8547	32.475	68.1932	90.8635	97.4569	80.3528	67.3935	72.2653	90.0719	64.8204
ZPLD1	1	85567535..85586457	ENSGALG00000015347	13	3	12	8	14	2	5	12	0.30639	0.0679722	0.317797	0.191973	0.264485	0.0566241	0.151461	0.282721	0.807757	0.173282	0.790018	0.471	0.699186	0.14162	0.388583	0.716861	0.579041	0.11982	0.548795	0.343022	0.44007	0.0980533	0.257348	0.524507
ALCAM	1	86503359..86619306	ENSGALG00000015348	777	1046	966	953	1370	850	978	925	6.78106	8.77581	9.47307	8.46813	9.58383	8.91118	10.9702	8.06981	17.8774	22.3722	23.5493	20.7764	25.3356	22.2874	28.1448	20.4617	34.6088	41.7772	44.178	40.8625	43.0639	41.6727	50.3373	40.4308
CBLB	1	complement(86647126..86769237)	ENSGALG00000015351	614	540	528	533	822	457	431	642	6.4333	5.43924	6.21637	5.68605	6.90366	5.75204	5.8042	6.72428	16.9606	13.8663	15.4534	13.9506	18.2503	14.3862	14.891	17.0499	27.3485	21.5676	24.147	22.8538	25.8384	22.4052	22.1834	28.0611
BBX	1	87305099..87349328	ENSGALG00000015353	297	240	212	209	324	201	236	393	3.68271	2.86089	2.95382	2.63861	3.22032	2.99397	3.76117	4.87135	9.70899	7.2933	7.34297	6.47378	8.51315	7.48809	9.64953	12.3517	13.2289	9.5856	9.69538	8.96144	10.1845	9.85436	12.1468	17.1776
CD47	1	complement(87434456..87455171)	ENSGALG00000015355	4558	5514	6555	5717	8654	4349	3876	4680	37.5457	43.6648	60.6731	47.9482	57.1407	43.0344	41.0365	38.5369	98.9844	111.315	150.828	117.64	151.056	107.631	105.282	97.7135	203.021	220.229	299.779	245.132	272.026	213.217	199.496	204.558
IFT57	1	complement(87472298..87488760)	ENSGALG00000015356	236	970	330	329	410	717	287	233	5.32163	21.0273	8.36149	7.55347	7.41069	19.4219	8.31791	5.25211	14.0298	53.605	20.786	18.5323	19.5907	48.5753	21.3401	13.3171	10.5118	38.7418	15.0919	14.1068	12.8878	35.1521	14.7718	10.1842
ENSGALG00000022871	1	87491686..87496064	ENSGALG00000022871	2183	2843	1958	2305	2789	2735	1505	2366	56.9673	71.3228	57.4146	61.2437	58.3396	85.7373	50.4788	61.7209	150.187	181.824	142.728	150.26	154.225	214.434	129.506	156.498	97.2343	113.549	89.5451	98.8331	87.6681	134.088	77.4619	103.415
MYH15	1	complement(87501152..87544931)	ENSGALG00000015358	31	44	34	29	33	25	26	34	0.149528	0.204029	0.184279	0.142422	0.12759	0.144857	0.161188	0.16394	0.39421	0.520132	0.458103	0.349428	0.337293	0.362296	0.413538	0.415682	1.38079	1.75736	1.55492	1.24345	1.03731	1.22567	1.33821	1.4861
KIAA1524	1	complement(87568051..87602011)	ENSGALG00000015360	147	190	159	173	207	153	113	129	1.03486	1.28587	1.25776	1.24002	1.16809	1.29388	1.02245	0.907817	2.72827	3.27807	3.12669	3.04236	3.08793	3.23608	2.62316	2.30184	6.54762	7.5886	7.27154	7.41785	6.50674	7.50108	5.81607	5.63846
SH2D1B	1	complement(87603283..87613437)	ENSGALG00000028448	38	46	50	29	108	43	46	26	2.1217	2.46909	3.13695	1.64861	4.83356	2.88409	3.3011	1.45117	5.59359	6.29448	7.79821	4.04482	12.7779	7.21328	8.46917	3.67957	1.69258	1.83724	2.28665	1.24345	3.39482	2.10815	2.36761	1.13643
TRAT1	1	87665838..87671223	ENSGALG00000015362	29	19	30	26	35	10	15	15	1.65076	1.03972	1.91886	1.50687	1.59696	0.683794	1.09743	0.853535	4.352	2.65057	4.77014	3.69708	4.22169	1.71021	2.81552	2.16421	1.29171	0.75886	1.37199	1.11482	1.10017	0.490266	0.772045	0.655634
HJURP	1	complement(87675054..87689414)	ENSGALG00000015363	135	172	183	168	206	121	128	119	1.34683	1.64963	2.05148	1.7065	1.64736	1.45012	1.64131	1.18678	3.55075	4.20542	5.09982	4.18687	4.35492	3.62684	4.21087	3.00919	6.01312	6.86968	8.36913	7.20346	6.47531	5.93222	6.58812	5.20137
GUCA1C	1	complement(87707512..87728548)	ENSGALG00000015364	0	0	0	0	0	0	0	0	0	0	0	0	0	0	0	0	0	0	0	0	0	0	0	0	0	0	0	0	0	0	0	0
NECTIN3	1	88234002..88277290	ENSGALG00000015367	599	577	591	820	929	557	631	705	9.57394	8.86581	10.6142	13.3443	11.9021	10.6945	12.9626	11.2641	25.2404	22.6017	26.3861	32.7399	31.464	26.7475	33.2564	28.5611	26.6804	23.0454	27.0282	35.1597	29.2018	27.3078	32.4774	30.8148
ENSGALG00000044180	1	88384642..88396202	ENSGALG00000044180	0	0	0	0	0	1	0	0	0	0	0	0	0	0.101677	0	0	0	0	0	0	0	0.2543	0	0	0	0	0	0	0	0.0490266	0	0
PLCXD2	1	88425958..88430283	ENSGALG00000015375	27	57	49	26	46	64	31	44	0.839654	1.70408	1.71226	0.823244	1.14667	2.39087	1.23908	1.36784	2.21364	4.34423	4.25655	2.01981	3.0313	5.97971	3.17893	3.46826	1.20262	2.27658	2.24091	1.11482	1.44594	3.13771	1.59556	1.92319
PHLDB2	1	88509484..88552963	ENSGALG00000015377	475	633	607	638	928	482	544	476	6.43947	8.24972	9.24661	8.80634	10.0843	7.84953	9.47885	6.45073	16.9768	21.0311	22.9863	21.6062	26.6587	19.6321	24.3186	16.3563	21.1573	25.282	27.7599	27.356	29.1703	23.6308	27.9995	20.8055
ABHD10	1	88560955..88564092	ENSGALG00000015378	54	48	72	61	72	47	43	47	1.893	1.61762	2.83614	2.17724	2.02317	1.97923	1.93743	1.64703	4.99065	4.12382	7.05041	5.3418	5.3484	4.95016	4.9706	4.17617	2.40525	1.91712	3.29277	2.61554	2.26321	2.30425	2.2132	2.05432
TAGLN3	1	88573241..88584467	ENSGALG00000015379	35	42	45	38	60	43	24	19	0.511279	0.589818	0.738651	0.565186	0.70256	0.754568	0.45061	0.277452	1.34792	1.50363	1.83623	1.38667	1.85727	1.88722	1.15607	0.703503	1.55896	1.67748	2.05798	1.62935	1.88601	2.10815	1.23527	0.83047
TMPRSS7	1	88606497..88632094	ENSGALG00000015389	341	307	158	222	224	230	161	262	4.00871	3.46951	2.08711	2.65719	2.11077	3.24802	2.43263	3.07891	10.5685	8.84485	5.18839	6.51935	5.57998	8.12348	6.24107	7.80683	15.1887	12.2616	7.2258	9.51885	7.04111	11.2761	8.28662	11.4517
ENSGALG00000019221	1	88638528..88655946	ENSGALG00000019221	18	48	4	27	24	10	3	42	0.286756	0.735123	0.071604	0.437947	0.306474	0.191373	0.0614273	0.668859	0.755995	1.87406	0.178002	1.07449	0.810186	0.478634	0.157595	1.69594	0.801749	1.91712	0.182932	1.1577	0.754405	0.490266	0.154409	1.83578
ENSGALG00000026299	1	88660356..88667176	ENSGALG00000026299	250	291	204	257	321	221	214	263	9.1828	10.2756	8.41982	9.6114	9.4511	9.75141	10.103	9.65686	24.2093	26.1957	20.931	23.5813	24.9847	24.3888	25.9198	24.4858	11.1354	11.6225	9.32952	11.0196	10.0902	10.8349	11.0145	11.4955
ENSGALG00000045596	1	88691478..88699579	ENSGALG00000045596	2	1	8	1	3	2	1	0	0.0522385	0.0251096	0.234794	0.0265937	0.0628093	0.0627524	0.0335707	0	0.13772	0.0640121	0.58368	0.065247	0.166041	0.156947	0.0861278	0	0.0890832	0.03994	0.365863	0.0428777	0.0943006	0.0980533	0.0514697	0
CD200L	1	88706603..88713873	ENSGALG00000015395	92	199	163	222	223	97	179	124	1.9624	4.08067	3.90682	4.82137	3.81282	2.48548	4.90741	2.64403	5.1736	10.4029	9.71205	11.8291	10.0795	6.21633	12.5903	6.70414	4.09783	7.94806	7.45447	9.51885	7.00968	4.75558	9.21307	5.41991
CD200	1	88719957..88732879	ENSGALG00000015396	280	424	373	418	667	338	442	318	2.4598	3.58085	3.68203	3.73883	4.69688	3.56696	4.99072	2.79263	6.48493	9.12869	9.15324	9.17314	12.4165	8.92117	12.804	7.08094	12.4716	16.9346	17.0584	17.9229	20.9662	16.571	22.7496	13.8994
ENSGALG00000015398	1	complement(88756399..88767807)	ENSGALG00000015398	63	43	80	73	83	43	33	36	3.17734	2.08483	4.53368	3.74856	3.3554	2.60515	2.13913	1.81498	8.37665	5.31488	11.2704	9.19702	8.87025	6.51562	5.48808	4.60202	2.80612	1.71742	3.65863	3.13007	2.60898	2.10815	1.6985	1.57352
CGGBP1	1	complement(88778331..88781892)	ENSGALG00000015400	219	288	251	305	380	229	252	284	3.67112	4.64115	4.72787	5.20562	5.10599	4.61137	5.42944	4.75902	9.67842	11.8317	11.7531	12.7719	13.4981	11.5333	13.9296	12.0669	9.75461	11.5027	11.479	13.0777	11.9447	11.2271	12.9704	12.4133
ZNF654	1	88782414..88815955	ENSGALG00000022866	399	360	308	300	423	304	271	414	3.56637	3.09339	3.09344	2.73019	3.03065	3.26413	3.11331	3.69912	9.40226	7.886	7.69004	6.69846	8.01175	8.16376	7.98739	9.37942	17.7721	14.3784	14.0857	12.8633	13.2964	14.9041	13.9483	18.0955
C3orf38	1	88820570..88827636	ENSGALG00000015402	559	771	623	699	947	663	533	583	9.3491	12.3963	11.708	11.9029	12.6955	13.3202	11.4574	9.74702	24.6477	31.6019	29.1052	29.2035	33.5615	33.3147	29.3946	24.7144	24.8988	30.7937	28.4916	29.9715	29.7676	32.5047	27.4333	25.4823
EPHA3	1	89165149..89382603	ENSGALG00000015403	181	207	175	182	268	120	195	196	1.63131	1.79352	1.77228	1.67012	1.93613	1.29921	2.25887	1.76587	4.30073	4.57224	4.40575	4.09759	5.1183	3.24939	5.79528	4.4775	8.06203	8.26758	8.00326	7.80374	8.42419	5.8832	10.0366	8.56696
ENSGALG00000044332	1	89540456..89541604	ENSGALG00000044332	3	5	1	2	3	1	1	1	0.0762436	0.122161	0.0285575	0.0517524	0.0611147	0.0305297	0.032665	0.0254055	0.201006	0.311425	0.0709916	0.126973	0.161561	0.0763565	0.083804	0.0644176	0.133625	0.1997	0.0457329	0.0857554	0.0943006	0.0490266	0.0514697	0.043709
PROS1	1	complement(89665016..89695407)	ENSGALG00000015409	1973	1562	2073	1607	2418	1344	1272	1302	28.8359	21.9466	34.0442	23.9134	28.3273	23.5964	23.8943	19.0223	76.0222	55.9486	84.6312	58.6709	74.8854	59.016	61.3023	48.2326	87.8806	62.3863	94.8044	68.9045	76.0063	65.8918	65.4694	56.9091
ARL13B	1	89700493..89743259	ENSGALG00000015412	96	107	119	113	176	134	118	90	2.01388	2.15787	2.80509	2.41357	2.9595	3.37682	3.1816	1.88734	5.30934	5.50108	6.97324	5.92164	7.82365	8.44562	8.16258	4.78551	4.27599	4.27358	5.44222	4.84518	5.5323	6.56957	6.07342	3.93381
STX19	1	complement(89710738..89711613)	ENSGALG00000015413	7	1	4	2	11	5	8	6	0.233344	0.0320463	0.149829	0.0678807	0.293923	0.20022	0.342758	0.199938	0.61518	0.0816958	0.372463	0.166544	0.777007	0.500763	0.879368	0.506958	0.311791	0.03994	0.182932	0.0857554	0.345769	0.245133	0.411757	0.262254
NSUN3	1	89747329..89765411	ENSGALG00000015414	165	145	126	135	168	126	127	147	3.16156	2.67094	2.71285	2.63372	2.58029	2.9002	3.12767	2.81566	8.33504	6.80905	6.74392	6.46177	6.82119	7.25357	8.02424	7.13933	7.34936	5.7913	5.76235	5.78849	5.28083	6.17736	6.53665	6.42522
ENSGALG00000040949	1	90715399..90844210	ENSGALG00000040949	0	0	0	0	0	0	0	0	0	0	0	0	0	0	0	0	0	0	0	0	0	0	0	0	0	0	0	0	0	0	0	0
EPHA6	1	90966178..91198887	ENSGALG00000015418	0	0	0	0	0	0	0	1	0	0	0	0	0	0	0	0.0127974	0	0	0	0	0	0	0	0.0324489	0	0	0	0	0	0	0	0.043709
ARL6	1	91211079..91229743	ENSGALG00000019215	83	123	138	157	165	135	115	119	1.70684	2.43163	3.18882	3.28724	2.71982	3.33494	3.03957	2.44628	4.49985	6.19898	7.92716	8.06518	7.19005	8.34087	7.7982	6.20274	3.69695	4.91262	6.31114	6.7318	5.18653	6.6186	5.91901	5.20137
ENSGALG00000046617	1	91266901..91280783	ENSGALG00000046617	45	14	13	6	19	7	21	25	2.54663	0.761657	0.826672	0.345718	0.861884	0.475873	1.52747	1.41429	6.71385	1.9417	2.05504	0.848212	2.27845	1.19018	3.91881	3.58604	2.00437	0.55916	0.594528	0.257266	0.597237	0.343187	1.08086	1.09272
ENSGALG00000024077	1	91283928..91330740	ENSGALG00000024077	357	387	356	351	505	265	400	291	3.29068	3.42931	3.68727	3.29414	3.73122	2.93429	4.7389	2.68136	8.67544	8.74237	9.16625	8.08211	9.86376	7.33883	12.1579	6.79881	15.9014	15.4568	16.2809	15.0501	15.8739	12.9921	20.5879	12.7193
MINA	1	complement(91331236..91345606)	ENSGALG00000039302	494	869	666	870	887	648	774	653	4.34371	7.34568	6.58029	7.78881	6.25172	6.84461	8.74731	5.73973	11.4516	18.7264	16.3581	19.1097	16.5269	17.1188	22.4418	14.5536	22.0036	34.7079	30.4581	37.3036	27.8815	31.7693	39.8375	28.5419
GABRR3	1	complement(91349792..91382664)	ENSGALG00000035787	4	1	0	0	0	1	5	3	0.0855716	0.0205659	0	0	0	0.0256986	0.13748	0.0641558	0.225598	0.0524289	0	0	0	0.0642737	0.352714	0.162672	0.178166	0.03994	0	0	0	0.0490266	0.257348	0.131127
DCAF6	1	complement(91417916..91498347)	ENSGALG00000015435	2480	2740	2528	2826	3418	2246	2212	2510	23.9958	25.4866	27.4851	27.8403	26.5093	26.1056	27.5086	24.2774	63.2617	64.9733	68.3258	68.3055	70.0792	65.2915	70.575	61.5573	110.463	109.436	115.613	121.172	107.44	110.114	113.851	109.709
MPC2	1	91498485..91505336	ENSGALG00000015437	2315	2492	1994	2743	2417	2145	1773	2404	87.7935	90.8529	84.9716	105.915	73.4735	97.719	86.4212	91.1363	231.456	231.612	211.233	259.859	194.233	244.401	221.719	231.083	103.114	99.5305	91.1915	117.614	75.9749	105.162	91.2557	105.076
MPZL1	1	complement(91524199..91543808)	ENSGALG00000015438	189	360	157	184	170	202	182	170	3.61431	6.61827	3.37365	3.58261	2.60588	4.64039	4.47337	3.24981	9.52865	16.872	8.38663	8.78985	6.88884	11.6059	11.4767	8.24014	8.41836	14.3784	7.18007	7.8895	5.3437	9.90338	9.36748	7.43052
RCSD1	1	complement(91546899..91582033)	ENSGALG00000040275	810	1090	1180	1085	1564	904	895	840	7.04379	9.11228	11.5303	9.6066	10.9019	9.44344	10.0033	7.30207	18.57	23.23	28.6634	23.5696	28.8199	23.6186	25.6642	18.515	36.0787	43.5346	53.9649	46.5223	49.1621	44.3201	46.0654	36.7155
CREG1	1	91590570..91595426	ENSGALG00000040426	1599	1937	2065	1895	5170	1897	1847	1743	20.9385	24.3841	30.3847	25.2653	54.2663	29.8404	31.086	22.816	55.2017	62.1625	75.5339	61.9879	143.457	74.6326	79.753	57.8519	71.222	77.3638	94.4385	81.2533	162.511	93.0036	95.0645	76.1847
CD247	1	91604244..91650623	ENSGALG00000015441	783	676	843	740	1044	638	458	466	14.3172	11.8829	17.3206	13.7768	15.3017	14.0139	10.7637	8.51782	37.7455	30.2932	43.0576	33.801	40.4512	35.0495	27.615	21.5976	34.8761	26.9994	38.5529	31.7295	32.8166	31.279	23.5731	20.3684
POU2F1	1	complement(91662967..91748448)	ENSGALG00000015446	116	58	68	56	79	51	65	113	1.36918	0.658127	0.90188	0.67299	0.747433	0.723124	0.986089	1.3333	3.60967	1.67777	2.242	1.65117	1.97589	1.80857	2.52987	3.38068	5.16683	2.31652	3.10984	2.40115	2.48325	2.50036	3.34553	4.93911
DUSP27	1	complement(91795813..91804632)	ENSGALG00000015453	16	27	18	16	28	27	20	22	0.134607	0.218369	0.17016	0.137052	0.18882	0.272867	0.216261	0.185019	0.354874	0.556689	0.423004	0.336254	0.49916	0.682457	0.55483	0.46913	0.712666	1.07838	0.823193	0.686043	0.880139	1.32372	1.02939	0.961597
GPA33	1	91812952..91819105	ENSGALG00000044138	4482	4777	3745	4247	4951	4126	3068	5421	147.887	151.528	138.851	142.679	130.947	163.542	130.111	178.807	389.886	386.292	345.172	350.059	346.167	409.027	333.808	453.379	199.635	190.793	171.27	182.102	155.627	202.284	157.909	236.946
MAEL	1	complement(91823350..91832861)	ENSGALG00000019211	5	7	7	11	15	7	8	10	0.118704	0.159762	0.186738	0.265894	0.285451	0.199634	0.244111	0.237324	0.312949	0.407283	0.464216	0.652364	0.754609	0.499297	0.626282	0.601755	0.222708	0.27958	0.320131	0.471655	0.471503	0.343187	0.411757	0.43709
ILDR2	1	91842335..91873904	ENSGALG00000015458	101	92	105	106	155	73	83	90	1.53133	1.34095	1.78884	1.63633	1.88374	1.32956	1.61742	1.36406	4.03714	3.4185	4.44693	4.01469	4.9798	3.32531	4.1496	3.45869	4.4987	3.67448	4.80196	4.54504	4.8722	3.57895	4.27198	3.93381
ZFP92	1	complement(91883040..91887840)	ENSGALG00000015459	851	849	740	897	1205	710	655	771	11.9588	11.4695	11.6849	12.8342	13.5733	11.9855	11.8304	10.8307	31.5277	29.2392	29.0478	31.4883	35.8821	29.9764	30.3515	27.4621	37.9049	33.9091	33.8424	38.4613	37.8774	34.8089	33.7126	33.6996
ENSGALG00000015461	1	91922427..91932287	ENSGALG00000015461	337	124	145	181	174	180	102	164	8.43983	2.98541	4.08046	4.61531	3.49297	5.41522	3.28325	4.10575	22.2505	7.61074	10.1437	11.3236	9.23394	13.5438	8.42338	10.4105	15.0105	4.95256	6.63127	7.76087	5.46944	8.8248	5.24991	7.16827
PTGFRN	1	91994160..92037790	ENSGALG00000015464	1362	1512	1224	918	2322	815	975	1625	19.048	20.3284	19.2349	13.0717	26.0301	13.6921	17.5257	22.718	50.2175	51.8233	47.8165	32.0712	68.8126	34.2447	44.9634	57.6034	60.6657	60.3893	55.9771	39.3617	72.9887	39.9567	50.1829	71.0271
ENSGALG00000036738	1	92066707..92234273	ENSGALG00000036738	3194	3070	2918	2503	4553	2519	2397	3162	23.5825	21.7908	24.2091	18.8163	26.9461	22.3421	22.747	23.338	62.1723	55.5515	60.1819	46.1654	71.234	55.8789	58.3588	59.1753	142.266	122.616	133.449	107.323	143.117	123.498	123.373	138.208
ADPRH	1	complement(92237349..92247857)	ENSGALG00000015473	1052	1206	1063	1161	1285	989	1004	902	11.5142	12.6895	13.0734	12.938	11.2736	13.0033	14.1238	9.86889	30.3556	32.3493	32.4993	31.7431	29.8025	32.5219	36.2354	25.0234	46.8578	48.1676	48.6141	49.781	40.3921	48.4874	51.6756	39.4255
CD80	1	92260427..92282945	ENSGALG00000015474	795	743	694	665	990	731	618	650	6.04086	5.4275	5.92555	5.14484	6.02989	6.67251	6.0356	4.93731	15.926	13.8364	14.7304	12.6227	15.9405	16.6883	15.4847	12.5189	35.4106	29.6754	31.7387	28.5137	31.1192	35.8385	31.8083	28.4108
TIMMDC1	1	complement(92284074..92290511)	ENSGALG00000024480	1016	1211	1063	1270	1699	1144	1059	1138	17.0509	19.5378	20.0458	21.7008	22.8554	23.0632	22.8428	19.0915	44.9524	49.8079	49.8323	53.2423	60.4199	57.6823	58.6046	48.4081	45.2543	48.3673	48.6141	54.4547	53.4056	56.0865	54.5064	49.7408
POGLUT1	1	complement(92291341..92306928)	ENSGALG00000015480	684	767	556	781	860	804	629	606	6.01799	6.48738	5.49676	6.99623	6.06507	8.4975	7.11288	5.32982	15.8656	16.5383	13.6645	17.1651	16.0335	21.2527	18.2485	13.5142	30.4665	30.634	25.4275	33.4875	27.0328	39.4174	32.3744	26.4876
BCL9	1	92375565..92389300	ENSGALG00000037655	747	937	707	847	1308	761	722	897	4.73792	5.71328	5.03876	5.46977	6.64993	5.79818	5.88578	5.68728	12.4909	14.5649	12.526	13.4199	17.5796	14.5016	15.1003	14.4206	33.2726	37.4238	32.3332	36.3174	41.1151	37.3093	37.1611	39.2069
ENSGALG00000029710	1	complement(92390152..92390319)	ENSGALG00000029710	0	1	2	2	2	1	0	4	0	0.167098	0.390625	0.353949	0.278654	0.208801	0	0.695021	0	0.425985	0.971063	0.868407	0.736643	0.522224	0	1.76228	0	0.03994	0.0914659	0.0857554	0.0628671	0.0490266	0	0.174836
ACP6	1	complement(92396608..92403912)	ENSGALG00000015485	2917	3620	2563	3207	3732	2777	2220	3466	36.3242	43.3358	35.8629	40.6609	37.2515	41.5409	35.5314	43.1453	95.764	110.476	89.1523	99.7605	98.477	103.896	91.1581	109.398	129.928	144.583	117.213	137.509	117.31	136.147	114.263	151.495
ENSGALG00000042735	1	complement(92419270..92420377)	ENSGALG00000042735	0	0	0	0	0	0	0	0	0	0	0	0	0	0	0	0	0	0	0	0	0	0	0	0	0	0	0	0	0	0	0	0
GJA5	1	complement(92426541..92445689)	ENSGALG00000039452	128	170	162	185	234	155	173	162	1.24385	1.58813	1.76893	1.83041	1.8227	1.80938	2.16075	1.57369	3.27925	4.04863	4.39741	4.49086	4.81845	4.52536	5.54353	3.99021	5.70132	6.7898	7.40873	7.93238	7.35545	7.59913	8.90425	7.08085
GJA8	1	92484844..92486046	ENSGALG00000015488	7	2	4	0	4	1	1	5	0.169916	0.0466708	0.109102	0	0.0778286	0.0291593	0.0311987	0.121325	0.447962	0.118978	0.27122	0	0.205746	0.072929	0.0800423	0.30763	0.311791	0.07988	0.182932	0	0.125734	0.0490266	0.0514697	0.218545
GPR89B	1	92495006..92518092	ENSGALG00000015491	7891	9357	7138	9517	9595	6313	4933	8812	45.0494	51.3538	45.79	55.3191	43.908	43.2945	36.1966	50.2894	118.767	130.917	113.83	135.724	116.074	108.282	92.8646	127.513	351.478	373.719	326.442	408.067	301.605	309.505	253.9	385.163
PDZK1	1	complement(92516395..92522811)	ENSGALG00000015492	11502	11145	8509	12058	11616	7263	7350	13416	214.479	199.788	178.29	228.931	173.624	162.692	176.156	250.08	565.445	509.321	443.214	561.676	458.988	406.902	451.94	634.098	512.317	445.131	389.142	517.02	365.132	356.081	378.302	586.399
HTR1F	1	complement(92577663..92578763)	ENSGALG00000015494	0	1	0	1	4	0	0	1	0	0.0254973	0	0.0270043	0.0850388	0	0	0.0265131	0	0.0650004	0	0.0662545	0.224806	0	0	0.067226	0	0.03994	0	0.0428777	0.125734	0	0	0.043709
POU1F1	1	92852810..92868421	ENSGALG00000015495	0	2	1	2	5	20	2	16	0	0.0163212	0.00953852	0.0172859	0.0340217	0.203945	0.021821	0.135772	0	0.0416078	0.023712	0.0424106	0.0899389	0.510079	0.055983	0.34426	0	0.07988	0.0457329	0.0857554	0.157168	0.980533	0.102939	0.699343
CHMP2B	1	complement(92870771..92882303)	ENSGALG00000015496	2745	3569	2929	3762	4488	3389	2827	3894	32.9189	41.1461	39.4694	45.9347	43.1418	48.8219	43.5742	46.6815	86.7865	104.894	98.1177	112.7	114.049	122.106	111.792	118.365	122.267	142.546	133.952	161.306	141.074	166.151	145.505	170.203
VGLL3	1	92953376..92971050	ENSGALG00000015497	47	54	49	49	70	43	45	36	1.61087	1.77924	1.88711	1.70993	1.92311	1.7704	1.98233	1.23342	4.24685	4.53584	4.69119	4.19526	5.08387	4.42787	5.08578	3.12743	2.09346	2.15676	2.24091	2.10101	2.20035	2.10815	2.31614	1.57352
CADM2	1	complement(93328062..93520050)	ENSGALG00000043393	17	9	12	16	8	5	10	8	0.397774	0.202446	0.315505	0.381176	0.150045	0.140539	0.300738	0.187121	1.04868	0.516097	0.78432	0.935208	0.396654	0.351497	0.771561	0.474461	0.757207	0.35946	0.548795	0.686043	0.251468	0.245133	0.514697	0.349672
GBE1	1	95109133..95290333	ENSGALG00000042771	347	583	578	711	713	444	592	489	3.59449	5.8057	6.72779	7.49886	5.92024	5.52498	7.88186	5.06362	9.47639	14.8005	16.7247	18.3983	15.6506	13.8183	20.2214	12.8392	15.4559	23.285	26.4336	30.4861	22.4121	21.7678	30.47	21.3737
ENSGALG00000036054	1	95844140..95844454	ENSGALG00000036054	0	0	0	1	0	0	0	0	0	0	0	0.0943865	0	0	0	0	0	0	0	0.231575	0	0	0	0	0	0	0	0.0428777	0	0	0	0
ENSGALG00000042104	1	96339614..96341066	ENSGALG00000042104	2	4	4	0	0	1	3	2	0.0932949	0.179377	0.209665	0	0	0.0560361	0.179866	0.0932617	0.24596	0.457287	0.52121	0	0	0.14015	0.461458	0.236472	0.0890832	0.15976	0.182932	0	0	0.0490266	0.154409	0.0874179
ENSGALG00000015511	1	96489993..96603886	ENSGALG00000015511	59	74	48	57	123	47	43	57	0.369875	0.445978	0.338128	0.363828	0.618088	0.353949	0.346475	0.357209	0.975127	1.13694	0.84056	0.892643	1.63396	0.885247	0.888902	0.905733	2.62795	2.95556	2.19518	2.44403	3.86633	2.30425	2.2132	2.49141
ROBO2	1	complement(96895939..97053385)	ENSGALG00000015519	151	164	114	89	165	75	106	109	0.988876	1.03249	0.838894	0.593435	0.866146	0.590019	0.892217	0.71357	2.60704	2.63215	2.08542	1.45598	2.28972	1.47567	2.28904	1.80931	6.72578	6.55016	5.21355	3.81612	5.18653	3.677	5.45579	4.76428
ENSGALG00000028863	1	complement(97304380..97306013)	ENSGALG00000028863	7	4	5	2	5	0	3	3	0.549487	0.301855	0.441029	0.159848	0.314609	0	0.302678	0.23541	1.44865	0.769521	1.09636	0.392184	0.831693	0	0.776539	0.596902	0.311791	0.15976	0.228665	0.0857554	0.157168	0	0.154409	0.131127
ENSGALG00000044721	1	complement(97943057..97963303)	ENSGALG00000044721	0	0	0	0	0	0	0	0	0	0	0	0	0	0	0	0	0	0	0	0	0	0	0	0	0	0	0	0	0	0	0	0
LIPI	1	complement(98014809..98030786)	ENSGALG00000015662	1087	1143	917	1183	1298	905	882	1276	22.803	23.0509	21.6157	25.2677	21.8263	22.8061	23.7811	26.7583	60.1172	58.7639	53.735	61.9938	57.6994	57.0394	61.0119	67.8479	48.4167	45.6514	41.9371	50.7243	40.8007	44.3691	45.3963	55.7726
ENSGALG00000019202	1	98038778..98038975	ENSGALG00000019202	19	38	25	34	36	20	21	33	2.80215	5.38765	4.143	5.10545	4.25581	3.54329	3.98067	4.86515	7.38749	13.7348	10.2992	12.5261	11.2505	8.86198	10.2127	12.336	0.84629	1.51772	1.14332	1.45784	1.13161	0.980533	1.08086	1.4424
ENSGALG00000044391	1	98039636..98043068	ENSGALG00000044391	227	353	207	342	426	227	198	300	2.97651	4.44975	3.04993	4.5659	4.47748	3.57559	3.33693	3.93232	7.84719	11.3438	7.58188	11.2023	11.8366	8.94276	8.56111	9.97071	10.1109	14.0988	9.46672	14.6642	13.3907	11.129	10.191	13.1127
ENSGALG00000015675	1	98044140..98077756	ENSGALG00000015675	757	853	857	808	1269	739	785	805	4.63134	5.01694	5.89154	5.03316	6.22322	5.4312	6.17278	4.92325	12.2099	12.7897	14.6459	12.3487	16.4515	13.5837	15.8366	12.4833	33.718	34.0688	39.1931	34.6452	39.8892	36.2307	40.4037	35.1857
HSPA13	1	complement(98081909..98089517)	ENSGALG00000019201	417	467	504	452	569	399	350	471	2.90342	3.12586	3.94314	3.20428	3.17562	3.33724	3.13215	3.27823	7.65449	7.96878	9.80232	7.86163	8.39499	8.34662	8.03572	8.31223	18.5738	18.652	23.0494	19.3807	17.8857	19.5616	18.0144	20.5869
SAMSN1	1	complement(98116750..98151387)	ENSGALG00000040926	393	356	394	321	416	306	307	266	5.06895	4.41423	5.71031	4.2155	4.30092	4.74119	5.08937	3.42967	13.3636	11.2532	14.1954	10.3426	11.3698	11.858	13.0571	8.69621	17.5048	14.2186	18.0188	13.7637	13.0764	15.0022	15.8012	11.6266
ENSGALG00000028720	1	98196541..98198044	ENSGALG00000028720	1	1	1	0	5	1	2	0	0.0267411	0.0257074	0.0300481	0	0.107175	0.0321233	0.06874	0	0.0704995	0.0655362	0.0746972	0	0.283324	0.0803421	0.176357	0	0.0445416	0.03994	0.0457329	0	0.157168	0.0490266	0.102939	0
NRIP1	1	complement(98322194..98325661)	ENSGALG00000015681	1585	1143	929	927	1495	1064	1071	1443	13.346	9.25227	8.78974	7.94733	10.0904	10.7623	11.5908	12.146	35.1851	23.5869	21.8506	19.4986	26.6746	26.9171	29.7369	30.7973	70.5984	45.6514	42.4859	39.7476	46.9931	52.1644	55.124	63.072
USP25	1	98606481..98697826	ENSGALG00000015693	1065	1377	1212	1359	1606	1066	1119	958	5.03145	6.25398	6.43404	6.53704	6.08179	6.0498	6.79475	4.52433	13.2648	15.9433	15.9945	16.0385	16.0777	15.1309	17.4324	11.4718	47.4368	54.9974	55.4283	58.2708	50.4823	52.2624	57.5946	41.8732
ENSGALG00000019198	1	98870218..98957333	ENSGALG00000019198	1	0	0	0	2	0	1	4	0.0817964	0	0	0	0.131131	0	0.105132	0.327069	0.215645	0	0	0	0.346655	0	0.269722	0.82931	0.0445416	0	0	0	0.0628671	0	0.0514697	0.174836
ENSGALG00000015701	1	99317066..99348561	ENSGALG00000015701	5071	5459	3622	5155	5410	4262	3970	5844	79.3568	82.1264	63.6908	82.1368	67.8626	80.1206	79.8512	91.421	209.214	209.365	158.33	201.521	179.4	200.386	204.863	231.805	225.87	218.032	165.645	221.035	170.055	208.952	204.335	255.435
C1H21ORF91	1	complement(99381867..99398599)	ENSGALG00000028290	215	283	291	266	390	273	229	225	3.42514	4.33416	5.20919	4.31459	4.9802	5.22447	4.68895	3.58317	9.02993	11.0491	12.9496	10.5858	13.1655	13.0667	12.0298	9.08542	9.57644	11.303	13.3083	11.4055	12.2591	13.3843	11.7866	9.83451
CHODL	1	99543952..99573128	ENSGALG00000015720	1	10	7	0	0	0	1	6	0.0194416	0.186901	0.152921	0	0	0	0.0249881	0.116608	0.0512553	0.476468	0.38015	0	0	0	0.0641084	0.295669	0.0445416	0.3994	0.320131	0	0	0	0.0514697	0.262254
TMPRSS15	1	complement(99575737..99632199)	ENSGALG00000015730	186	961	636	200	255	145	521	496	1.61698	8.03146	6.21279	1.77027	1.77695	1.51426	5.82143	4.31042	4.26296	20.4747	15.4445	4.34333	4.69749	3.78725	14.9353	10.9294	8.28474	38.3823	29.0861	8.57554	8.01555	7.10886	26.8157	21.6796
NCAM2	1	100721520..100975548	ENSGALG00000015737	6	11	5	8	11	4	8	6	0.0286287	0.0504571	0.0268076	0.038865	0.0420713	0.0229272	0.0490615	0.0286185	0.0754759	0.128631	0.0666416	0.0953545	0.111219	0.0573422	0.12587	0.0725646	0.26725	0.43934	0.228665	0.343022	0.345769	0.196107	0.411757	0.262254
ENSGALG00000045979	1	complement(101040149..101040594)	ENSGALG00000045979	29702	6679	12843	11047	6176	2824	9141	19196	2110.31	456.195	1025.33	799.14	351.731	241.027	834.746	1363.38	5563.56	1162.98	2548.89	1960.67	929.826	602.822	2141.59	3456.96	1322.97	266.759	587.348	473.67	194.134	138.451	470.484	839.037
ENSGALG00000038169	1	complement(101040919..101041077)	ENSGALG00000038169	3015	549	1115	1067	580	302	917	1790	553.723	96.9296	230.1	199.521	85.3838	66.6273	216.458	328.627	1459.82	247.103	572.011	489.519	225.718	166.639	555.338	833.261	134.293	21.9271	50.9922	45.7505	18.2315	14.806	47.1977	78.239
ENSGALG00000039711	1	101041201..101041500	ENSGALG00000039711	29044	6712	11778	11064	6061	2777	9578	18291	2827.08	628.076	1288.22	1096.51	472.898	324.711	1198.27	1779.77	7453.22	1601.16	3202.41	2690.26	1250.14	812.121	3074.25	4512.75	1293.67	268.077	538.642	474.399	190.519	136.147	492.977	799.48
ENSGALG00000032731	1	complement(101072266..101072676)	ENSGALG00000032731	13639	4912	6823	7531	5236	2324	6160	11277	969.043	335.504	544.72	544.793	298.196	198.352	562.524	800.939	2554.76	855.303	1354.13	1336.64	788.304	496.09	1443.19	2030.84	607.503	196.185	312.036	322.912	164.586	113.938	317.053	492.906
MRPL39	1	complement(102491710..102501217)	ENSGALG00000015742	565	640	617	646	815	538	436	570	11.2389	12.2387	13.7911	13.0836	12.995	12.8558	11.1471	11.3343	29.63	31.2002	34.2836	32.1003	34.3532	32.1531	28.5986	28.7391	25.166	25.5616	28.2172	27.699	25.6183	26.3763	22.4408	24.9141
JAM2	1	102510328..102543990	ENSGALG00000015746	279	310	317	333	505	293	358	235	4.63697	4.95303	5.92007	5.63499	6.72766	5.84976	7.6474	3.9043	12.2248	12.6268	14.7168	13.8253	17.7851	14.6306	19.6199	9.89968	12.4271	12.3814	14.4973	14.2783	15.8739	14.3648	18.4261	10.2716
ATP5PF	1	complement(102543808..102548326)	ENSGALG00000015751	2297	2528	2539	2617	2722	2005	1943	2480	51.9159	54.9283	64.4822	60.2229	49.314	54.437	56.4433	56.0321	136.87	140.029	160.298	147.756	130.365	136.15	144.809	142.074	102.312	100.968	116.116	112.211	85.5621	98.2984	100.006	108.398
GABPA	1	102548449..102578189	ENSGALG00000015763	1671	1803	1844	1903	2695	1545	1519	1543	11.4867	11.915	14.2435	13.3191	14.8497	12.7581	13.4207	10.603	30.2831	30.3749	35.4081	32.6781	39.2564	31.9088	34.4317	26.8848	74.429	72.0118	84.3315	81.5963	84.7134	75.7462	78.1824	67.4429
APP	1	complement(102609866..102809834)	ENSGALG00000015770	15447	18194	15156	17740	26497	19077	14343	17420	139.565	158.03	153.87	163.193	191.898	207.053	166.56	157.335	367.944	402.866	382.508	400.392	507.296	517.851	427.32	398.935	688.034	726.668	693.128	760.651	832.894	935.281	738.23	761.41
CYYR1	1	complement(102882363..102939069)	ENSGALG00000015774	58	53	36	47	95	39	47	42	0.646441	0.567879	0.450859	0.533356	0.848725	0.522163	0.673285	0.467946	1.70426	1.4477	1.1208	1.30858	2.24367	1.30596	1.72735	1.18651	2.58341	2.11682	1.64639	2.01525	2.98619	1.91204	2.41907	1.83578
ADAMTS1	1	complement(103028117..103033674)	ENSGALG00000040342	263	323	182	185	468	256	187	215	2.76755	3.26754	2.15203	1.98212	3.94755	3.23608	2.52919	2.26164	7.29628	8.32996	5.34977	4.86308	10.4356	8.09362	6.48879	5.73456	11.7144	12.9006	8.32339	7.93238	14.7109	12.5508	9.62483	9.39743
ENSGALG00000015793	1	103054571..103056485	ENSGALG00000015793	0	0	1	0	1	0	0	0	0	0	0.122893	0	0.0876665	0	0	0	0	0	0.305503	0	0.231753	0	0	0	0	0	0.0457329	0	0.0314335	0	0	0
ADAMTS5	1	complement(103067330..103106355)	ENSGALG00000015795	31	21	22	15	25	18	31	19	0.461387	0.30047	0.367928	0.227307	0.298254	0.321822	0.593014	0.282685	1.21639	0.765991	0.914641	0.557693	0.788455	0.804895	1.52141	0.716769	1.38079	0.83874	1.00612	0.643166	0.785838	0.88248	1.59556	0.83047
N6AMT1	1	103950360..103953450	ENSGALG00000015802	99	272	214	334	265	246	233	186	2.67184	7.05705	6.48972	9.17783	5.73275	7.97536	8.08223	5.01803	7.04395	17.9906	16.1329	22.5176	15.155	19.9468	20.7355	12.7236	4.40962	10.8637	9.78685	14.3212	8.32989	12.0606	11.9924	8.12987
LTN1	1	complement(103956431..103984023)	ENSGALG00000015804	1618	1830	1586	1738	2408	1526	1418	1766	7.43941	8.08892	8.19409	8.13632	8.87481	8.42859	8.37985	8.11701	19.613	20.6211	20.3699	19.9623	23.4612	21.0804	21.499	20.5813	72.0683	73.0902	72.5324	74.5215	75.692	74.8147	72.984	77.19
RWDD2B	1	complement(103984364..103987705)	ENSGALG00000015807	394	692	430	593	591	406	381	419	4.88964	8.25592	5.99634	7.49296	5.87909	6.05266	6.07723	5.19804	12.8909	21.0469	14.9064	18.3838	15.5418	15.1381	15.5915	13.18	17.5494	27.6385	19.6652	25.4265	18.5772	19.9048	19.6099	18.3141
USP16	1	103990536..104008446	ENSGALG00000015813	958	1350	944	1236	1484	1022	848	1101	11.2124	15.1895	12.4148	14.7288	13.9222	14.3689	12.7564	12.8814	29.5599	38.7228	30.8623	36.1369	36.8044	35.9374	32.7273	32.6619	42.6709	53.919	43.1719	52.9969	46.6474	50.1052	43.6463	48.1236
CCT8	1	complement(104009937..104020977)	ENSGALG00000015821	2651	3357	2881	3519	3358	2552	2470	2792	34.4516	41.9401	42.0707	46.5626	34.9802	39.8401	41.2569	36.271	90.8271	106.918	104.584	114.24	92.4727	99.6423	105.847	91.9681	118.08	134.079	131.757	150.887	105.554	125.116	127.13	122.035
MAP3K7CL	1	104036135..104064217	ENSGALG00000015822	97	90	61	120	166	168	79	134	5.18778	4.62734	3.66587	6.53445	7.1164	10.7934	5.43046	7.16407	13.6769	11.7965	9.11306	16.0321	18.8127	26.995	13.9322	18.1651	4.32054	3.5946	2.78971	5.14533	5.21797	8.23648	4.0661	5.857
BACH1	1	104102312..104115468	ENSGALG00000015828	1409	1302	945	1218	1653	1080	1051	1398	17.9045	15.9053	13.4934	15.7586	16.8371	16.486	17.1654	17.7584	47.203	40.5475	33.5435	38.6634	44.5101	41.2325	44.039	45.0279	62.7591	52.0019	43.2176	52.2251	51.9596	52.9488	54.0946	61.1051
GRIK1	1	complement(104161063..104236516)	ENSGALG00000015835	91	113	84	163	222	170	232	94	0.873256	1.04246	0.905768	1.5926	1.70764	1.9597	2.86146	0.901724	2.30223	2.65754	2.25167	3.9074	4.51427	4.90132	7.34127	2.28639	4.05329	4.51322	3.84157	6.98907	6.97825	8.33453	11.941	4.10864
CLDN17	1	complement(104396470..104397405)	ENSGALG00000044073	0	0	0	0	0	0	0	0	0	0	0	0	0	0	0	0	0	0	0	0	0	0	0	0	0	0	0	0	0	0	0	0
CLDN8	1	complement(104409441..104410115)	ENSGALG00000015841	0	0	0	0	0	0	0	0	0	0	0	0	0	0	0	0	0	0	0	0	0	0	0	0	0	0	0	0	0	0	0	0
TIAM1	1	complement(104463378..104576084)	ENSGALG00000015842	267	178	273	132	320	145	118	113	1.55935	0.999382	1.79156	0.784918	1.49804	1.01728	0.885756	0.659714	4.11102	2.54773	4.45368	1.92578	3.96019	2.54427	2.27246	1.67276	11.8926	7.10932	12.4851	5.65986	10.0587	7.10886	6.07342	4.93911
SOD1	1	104652929..104660240	ENSGALG00000015844	6724	8409	6251	8093	9472	7079	5910	7915	100.951	121.369	105.456	123.712	113.99	127.672	114.043	118.79	266.144	309.406	262.154	303.524	301.341	319.314	292.586	301.201	299.498	335.855	285.877	347.009	297.738	347.06	304.186	345.956
SCAF4	1	complement(104661130..104704725)	ENSGALG00000033965	1012	1067	874	911	1583	964	795	1097	8.52864	8.64455	8.27652	7.81692	10.6936	9.75925	8.61125	9.24168	22.4846	22.0376	20.5748	19.1786	28.2692	24.4084	22.0927	23.433	45.0761	42.616	39.9706	39.0616	49.7593	47.2617	40.9184	47.9487
HUNK	1	104732138..104786820	ENSGALG00000015879	68	50	53	45	109	64	75	55	0.925729	0.654371	0.810752	0.623743	1.18944	1.04663	1.31231	0.748485	2.44056	1.66819	2.01547	1.53034	3.14438	2.61769	3.36681	1.89784	3.02883	1.997	2.42385	1.9295	3.42626	3.13771	3.86023	2.40399
MIS18A	1	complement(104878056..104881365)	ENSGALG00000015884	121	219	160	185	268	146	147	139	2.3874	4.15397	3.5473	3.71647	4.23855	3.46046	3.72785	2.74158	6.29408	10.5898	8.8183	9.11827	11.2049	8.6548	9.56402	6.95149	5.38953	8.74686	7.31727	7.93238	8.42419	7.15789	7.56604	6.07554
URB1	1	complement(104901269..104945059)	ENSGALG00000015887	440	547	437	485	668	355	412	409	1.88506	2.25289	2.10374	2.1156	2.29399	1.82701	2.26866	1.75163	4.96972	5.7433	5.22972	5.19057	6.06433	4.56946	5.8204	4.44139	19.5983	21.8472	19.9853	20.7957	20.9976	17.4045	21.2055	17.877
ENSGALG00000032882	1	104968387..104988771	ENSGALG00000032882	37	77	58	48	78	65	70	48	1.08806	2.17682	1.91654	1.43718	1.83861	2.29618	2.64576	1.41104	2.86854	5.54939	4.76437	3.5261	4.86051	5.74288	6.78787	3.57781	1.64804	3.07538	2.65251	2.05813	2.45182	3.18673	3.60288	2.09803
C1H21ORF59	1	complement(104998580..105005906)	ENSGALG00000037962	183	261	291	269	349	345	245	222	4.32	5.92314	7.71903	6.46552	6.6039	9.78345	7.43359	5.23879	11.3891	15.0999	19.1889	15.863	17.4579	24.469	19.0713	13.2834	8.15111	10.4243	13.3083	11.5341	10.9703	16.9142	12.6101	9.70339
SYNJ1	1	complement(105010118..105068573)	ENSGALG00000034317	722	588	540	486	892	560	478	721	4.45454	3.48756	3.74366	3.05295	4.41137	4.15044	3.79048	4.44679	11.7438	8.89087	9.30645	7.49035	11.6618	10.3805	9.7247	11.2752	32.159	23.4847	24.6958	20.8386	28.0387	27.4549	24.6025	31.5142
PAXBP1	1	complement(105074236..105098431)	ENSGALG00000036833	1034	1464	1093	1359	1656	1157	1113	1201	11.0845	15.0874	13.166	14.8331	14.2298	14.8994	15.3352	12.8701	29.2228	38.4625	32.7295	36.3928	37.6174	37.2642	39.3435	32.6333	46.056	58.4722	49.9861	58.2708	52.0539	56.7238	57.2858	52.4945
C21orf62	1	complement(105102339..105103016)	ENSGALG00000040059	0	1	1	1	2	7	0	1	0	0.0414049	0.0483961	0.0438522	0.069047	0.362169	0	0.0430544	0	0.105554	0.120309	0.10759	0.182531	0.905804	0	0.109168	0	0.03994	0.0457329	0.0428777	0.0628671	0.343187	0	0.043709
OLIG2	1	105180397..105182189	ENSGALG00000031010	0	0	0	0	0	1	0	0	0	0	0	0	0	0.0225296	0	0	0	0	0	0	0	0.0563479	0	0	0	0	0	0	0	0.0490266	0	0
IFNAR2	1	105237837..105249123	ENSGALG00000041867	925	988	1038	1026	1363	926	881	1022	14.3068	14.6905	18.0399	16.1572	16.8981	17.2049	17.5136	15.8014	37.718	37.4506	44.8458	39.6413	44.6714	43.0304	44.9323	40.0658	41.201	39.4607	47.4708	43.9925	42.8439	45.3987	45.3448	44.6706
IL10RB	1	105251516..105262183	ENSGALG00000037989	1392	1534	1040	1487	1734	1295	1222	1229	20.2532	21.4565	17.003	22.0285	20.223	22.6342	22.8521	17.8752	53.395	54.6993	42.2681	54.0463	53.4611	56.6094	58.6285	45.3241	62.0019	61.268	47.5622	63.7592	54.5058	63.4895	62.8959	53.7183
IFNAR1	1	105271218..105289300	ENSGALG00000030363	486	622	487	491	756	472	474	458	5.8523	7.20046	6.58957	6.01991	7.29717	6.82767	7.33616	5.51317	15.4288	18.3562	16.3811	14.7697	19.2906	17.0764	18.8214	13.9791	21.6472	24.8427	22.2719	21.053	23.7638	23.1406	24.3966	20.0187
IFNGR2	1	105302731..105311192	ENSGALG00000032660	3296	3602	3200	3563	4662	3374	2983	3287	43.8685	46.0881	47.8578	48.2836	49.7371	53.945	51.0292	43.7331	115.654	117.493	118.971	118.463	131.484	134.919	130.919	110.889	146.809	143.864	146.345	152.773	146.543	165.416	153.534	143.671
TMEM50B	1	complement(105312337..105323532)	ENSGALG00000034396	2241	2452	2280	2463	3259	2183	1896	2239	31.1917	32.8093	35.659	34.9043	36.36	36.4998	33.9184	31.1527	82.2328	83.6409	88.6454	85.637	96.1203	91.2881	87.0197	78.9903	99.8177	97.9329	104.271	105.608	102.442	107.025	97.5865	97.8644
DNAJC28	1	complement(105324804..105326122)	ENSGALG00000037414	216	247	188	248	277	161	201	212	5.63671	6.19652	5.51274	6.58934	5.79421	5.04706	6.74168	5.53036	14.8605	15.7968	13.7042	16.1668	15.3174	12.623	17.2962	14.0227	9.62099	9.86518	8.59779	10.6337	8.70709	7.89329	10.3454	9.2663
ENSGALG00000033199	1	105330816..105350209	ENSGALG00000033199	3	6	5	1	1	3	4	3	0.0281052	0.0540376	0.0526348	0.00953858	0.00750945	0.0337619	0.0481643	0.0280952	0.0740957	0.137758	0.130846	0.0234027	0.0198518	0.0844404	0.123569	0.0712376	0.133625	0.23964	0.228665	0.0428777	0.0314335	0.14708	0.205879	0.131127
GART	1	complement(105352798..105389904)	ENSGALG00000037076	406	582	454	548	592	393	528	393	3.0635	4.22176	3.84932	4.21008	3.5806	3.56225	5.12065	2.96435	8.07651	10.7626	9.56911	10.3293	9.46557	8.90938	13.1374	7.51634	18.0839	23.2451	20.7628	23.497	18.6087	19.2675	27.176	17.1776
ENSGALG00000045818	1	105394214..105399695	ENSGALG00000045818	130	36	44	39	48	38	49	111	4.58475	1.22054	1.74366	1.40041	1.35692	1.60989	2.2211	3.91327	12.0871	3.11154	4.3346	3.43587	3.58713	4.02642	5.69837	9.92242	5.79041	1.43784	2.01225	1.67223	1.50881	1.86301	2.52201	4.85169
ENSGALG00000035096	1	105406560..105430638	ENSGALG00000035096	3804	4646	3720	4601	6344	4114	3299	3745	40.2033	47.2041	44.1776	49.5099	53.7436	52.2307	44.813	39.5657	105.991	120.338	109.822	121.471	142.075	130.632	114.97	100.322	169.436	185.561	170.126	197.28	199.414	201.696	169.798	163.69
DONSON	1	complement(105433842..105439140)	ENSGALG00000038649	112	97	81	95	120	80	77	93	1.94675	1.62085	1.58203	1.68126	1.67192	1.67041	1.72022	1.61592	5.13236	4.13205	3.93281	4.12493	4.41986	4.17779	4.41333	4.09731	4.98866	3.87418	3.70437	4.07338	3.77202	3.92213	3.96317	4.06493
CRYZL1	1	complement(105440356..105461262)	ENSGALG00000029670	903	880	749	922	1092	714	677	761	15.0164	14.0682	13.9958	15.6109	14.556	14.2632	14.4699	12.6505	39.5888	35.8643	34.7924	38.3009	38.4799	35.673	37.1235	32.0764	40.2211	35.1472	34.254	39.5333	34.3254	35.005	34.845	33.2625
ITSN1	1	105492244..105575073	ENSGALG00000036677	1782	1582	1588	1654	2024	1429	1564	2034	10.0573	8.58344	10.0708	9.50451	9.15648	9.68832	11.3452	11.4755	26.5149	21.8818	25.0352	23.3191	24.2058	24.231	29.1069	29.0971	79.3731	63.1851	72.6239	70.9197	63.6215	70.0591	80.4986	88.904
ENSGALG00000041812	1	complement(105581785..105585111)	ENSGALG00000041812	6035	5825	5711	6331	6937	5659	4747	5119	188.683	175.078	200.634	201.533	173.848	212.537	190.754	159.987	497.438	446.326	498.761	494.456	459.58	531.568	489.392	405.661	268.809	232.651	261.181	271.459	218.054	277.442	244.327	223.746
MRPS6	1	105648428..105695763	ENSGALG00000027579	754	722	1035	700	1426	1487	1075	830	11.4855	10.573	17.7157	10.8567	17.4117	27.2102	21.0469	12.6387	30.2801	26.9537	44.0398	26.6366	46.0292	68.0542	53.9972	32.0465	33.5844	28.8367	47.3336	30.0144	44.8242	72.9026	55.3299	36.2784
KCNE2	1	105836791..105837168	ENSGALG00000030793	37	36	81	43	142	90	56	49	2.85833	2.67357	7.03125	3.38218	8.79308	8.35205	5.5603	3.78401	7.53561	6.81576	17.4791	8.29811	23.2452	20.889	14.2653	9.59465	1.64804	1.43784	3.70437	1.84374	4.46356	4.4124	2.8823	2.14174
ENSGALG00000034083	1	105847674..105847844	ENSGALG00000034083	31	41	47	41	40	39	36	14	5.2938	6.73084	9.01865	7.12867	5.47531	8.00039	7.90148	2.3899	13.9564	17.159	22.4196	17.49	14.4744	20.0094	20.2718	6.05978	1.38079	1.63754	2.14945	1.75799	1.25734	1.91204	1.85291	0.611925
ENSGALG00000016011	1	complement(105858207..105858968)	ENSGALG00000016011	1	0	0	0	1	0	0	0	0.0383219	0	0	0	0.0307178	0	0	0	0.101031	0	0	0	0.0812047	0	0	0	0.0445416	0	0	0	0.0314335	0	0	0
ENSGALG00000038184	1	complement(105865206..105865619)	ENSGALG00000038184	0	1	2	0	1	0	2	1	0	0.067808	0.158515	0	0.0565385	0	0.181314	0.0705094	0	0.172863	0.394055	0	0.149464	0	0.465173	0.178782	0	0.03994	0.0914659	0	0.0314335	0	0.102939	0.043709
ENSGALG00000016012	1	complement(105882338..105883133)	ENSGALG00000016012	0	0	2	0	0	1	1	0	0	0	0.16572	0	0	0.0885824	0.0947779	0	0	0	0.411966	0	0	0.22155	0.243159	0	0	0	0.0914659	0	0	0.0490266	0.0514697	0
RCAN1	1	complement(105909217..105918527)	ENSGALG00000016014	900	1311	1061	1193	1512	838	890	996	7.72976	10.8244	10.2394	10.4323	10.4092	8.64585	9.82457	8.55122	20.3785	27.5948	25.4544	25.5955	27.5175	21.6238	25.2055	21.6823	40.0874	52.3613	48.5226	51.1531	47.5275	41.0843	45.808	43.5341
ENSGALG00000043342	1	complement(105961857..105963482)	ENSGALG00000043342	60	36	38	37	76	28	29	25	1.07754	0.621532	0.766836	0.676553	1.09405	0.60406	0.669391	0.448815	2.84079	1.58448	1.90629	1.65991	2.89221	1.51079	1.71736	1.13801	2.6725	1.43784	1.73785	1.58648	2.38895	1.37275	1.49262	1.09272
CLIC6	1	105984248..105989738	ENSGALG00000016020	9	14	23	18	37	13	33	12	0.372783	0.557468	1.07048	0.759109	1.22845	0.64684	1.75682	0.496866	0.982793	1.42116	2.66113	1.86246	3.2475	1.61778	4.50723	1.25984	0.400874	0.55916	1.05186	0.771799	1.16304	0.637346	1.6985	0.524507
RUNX1	1	complement(106016234..106164482)	ENSGALG00000016022	91	39	62	50	80	43	44	35	1.43717	0.592119	1.10026	0.803996	1.01274	0.815782	0.893137	0.552559	3.7889	1.50949	2.73515	1.97258	2.67725	2.04032	2.2914	1.40106	4.05329	1.55766	2.83544	2.14389	2.51468	2.10815	2.26467	1.52981
SETD4	1	complement(106560582..106570024)	ENSGALG00000016024	514	621	391	536	871	522	510	494	5.99899	6.96764	5.12778	6.36939	8.14846	7.31856	7.65042	5.76351	15.8156	17.7627	12.7472	15.6272	21.5411	18.3041	19.6276	14.6138	22.8944	24.8027	17.8816	22.9825	27.3786	25.5919	26.2495	21.5922
CBR1	1	106570974..106577329	ENSGALG00000016027	7818	9485	9932	10728	12331	9197	6273	9035	126.48	147.517	180.551	176.71	159.906	178.736	130.437	146.116	333.447	376.066	448.835	433.555	422.724	447.028	334.644	370.489	348.226	378.831	454.219	459.992	387.607	450.898	322.869	394.91
DOPEY2	1	106583143..106626008	ENSGALG00000016036	1442	1351	1630	1457	1951	1358	1276	1303	6.11506	5.50769	7.76712	6.2909	6.63185	6.91791	6.95482	5.52363	16.1216	14.0408	19.3084	15.4346	17.5318	17.3021	17.843	14.0056	64.229	53.9589	74.5447	62.4728	61.3268	66.5782	65.6753	56.9528
MORC3	1	106632094..106659882	ENSGALG00000036556	1498	2071	1860	2110	2901	1768	1848	1900	8.66896	11.5216	12.095	12.4324	13.4569	12.2907	13.7454	10.9914	22.8546	29.3722	30.0672	30.5027	35.5743	30.7398	35.2647	27.8696	66.7233	82.7157	85.0632	90.472	91.1887	86.6791	95.116	83.047
CHAF1B	1	106660194..106677742	ENSGALG00000016042	343	394	372	336	509	299	285	299	3.81709	4.21516	4.65178	3.80712	4.54045	3.99714	4.07646	3.32625	10.0633	10.7457	11.5639	9.34067	12.003	9.99708	10.4584	8.43397	15.2778	15.7364	17.0126	14.4069	15.9997	14.659	14.6689	13.069
CLDN14	1	complement(106700853..106701560)	ENSGALG00000016043	0	0	0	0	0	1	0	0	0	0	0	0	0	0.0495461	0	0	0	0	0	0	0	0.123918	0	0	0	0	0	0	0	0.0490266	0	0
SIM2	1	106801831..106857046	ENSGALG00000016044	5	2	0	0	0	1	1	3	0.0633709	0.0243685	0	0	0	0.0152251	0.01629	0.038009	0.167069	0.0621228	0	0	0	0.0380788	0.0417929	0.0963748	0.222708	0.07988	0	0	0	0.0490266	0.0514697	0.131127
HLCS	1	complement(106864786..106977050)	ENSGALG00000016047	509	459	360	392	517	284	333	483	5.38531	4.66858	4.27989	4.22277	4.38456	3.60954	4.52832	5.10841	14.1977	11.9017	10.6395	10.3605	11.5909	9.02766	11.6177	12.9528	22.6717	18.3325	16.4639	16.8081	16.2511	13.9236	17.1394	21.1114
ENSGALG00000029218	1	106987622..106989105	ENSGALG00000029218	0	1	0	0	0	0	2	0	0	0.114116	0	0	0	0	0.305139	0	0	0.290917	0	0	0	0	0.782852	0	0	0.03994	0	0	0	0	0.102939	0
PIGP	1	complement(106997553..107001534)	ENSGALG00000038098	125	348	163	161	268	234	136	208	3.26199	8.73033	4.77966	4.27776	5.60595	7.33547	4.56154	5.42601	8.5998	22.2563	11.8819	10.4954	14.8197	18.3464	11.7029	13.7581	5.5677	13.8991	7.45447	6.90331	8.42419	11.4722	6.99988	9.09146
ENSGALG00000016050	1	107001974..107060482	ENSGALG00000016050	1990	2447	1847	2058	2785	1813	1791	2070	9.62096	11.3731	10.0339	10.1305	10.7928	10.5294	11.1291	10.0042	25.3644	28.9935	24.9435	24.8548	28.5315	26.3346	28.5525	25.3664	88.6378	97.7332	84.4687	88.2423	87.5424	88.8853	92.1822	90.4775
VPS26C	1	complement(107063968..107080263)	ENSGALG00000016052	852	862	857	928	1140	696	729	774	16.7652	16.3063	18.949	18.5924	17.9811	16.452	18.4372	15.2249	44.1992	41.5697	47.1057	45.6159	47.5343	41.1473	47.3019	38.604	37.9494	34.4283	39.1931	39.7905	35.8342	34.1225	37.5214	33.8307
DYRK1A	1	107160884..107182204	ENSGALG00000016053	657	628	508	525	938	508	489	644	8.37053	7.69177	7.27258	6.81028	9.57928	7.77484	8.00749	8.20198	22.0678	19.6087	18.0791	16.7089	25.3235	19.4453	20.5437	20.7968	29.2638	25.0823	23.2323	22.5108	29.4847	24.9055	25.1687	28.1486
KCNJ6	1	complement(107227585..107265433)	ENSGALG00000016054	0	0	0	0	0	0	0	0	0	0	0	0	0	0	0	0	0	0	0	0	0	0	0	0	0	0	0	0	0	0	0	0
KCNJ15	1	107539724..107541289	ENSGALG00000016055	672	834	1122	1256	1777	1144	1053	1100	16.1908	19.3172	30.3759	30.8111	34.3186	33.1105	32.6083	26.4934	42.685	49.2456	75.5122	75.5944	90.7237	82.8113	83.6586	67.1761	29.932	33.31	51.3123	53.8544	55.8574	56.0865	54.1976	48.0799
ERG	1	complement(107579587..107693888)	ENSGALG00000016058	87	105	110	84	212	105	97	112	1.62437	1.88466	2.30779	1.59685	3.17281	2.35502	2.32776	2.0904	4.28244	4.80459	5.73697	3.91783	8.38755	5.89004	5.972	5.30037	3.87512	4.1937	5.03062	3.60173	6.66391	5.1478	4.99256	4.8954
ETS2	1	107802243..107815381	ENSGALG00000016059	1483	1529	1424	1467	2353	1417	1208	1399	22.6021	22.4023	24.3868	22.7643	28.7456	25.9428	23.6632	21.3142	59.5874	57.1104	60.6235	55.8518	75.9911	64.8844	60.7095	54.044	66.0552	61.0683	65.1237	62.9016	73.9631	69.4708	62.1754	61.1488
PSMG1	1	complement(107931746..107940716)	ENSGALG00000016062	454	556	502	533	687	420	421	447	5.40456	6.36295	6.715	6.46026	6.55547	6.00612	6.4415	5.31934	14.2484	16.2211	16.6929	15.8501	17.3299	15.0217	16.5261	13.4876	20.2219	22.2066	22.9579	22.8538	21.5948	20.5912	21.6687	19.5379
BRWD1	1	complement(107943223..107993948)	ENSGALG00000016065	1866	2151	1906	1898	3102	1730	1808	2067	7.7976	8.6411	8.94972	8.0754	10.3904	8.68432	9.71064	8.63446	20.5574	22.0288	22.2483	19.8128	27.4679	21.72	24.9133	21.8934	83.1146	85.9109	87.167	81.3819	97.5068	84.8161	93.0572	90.3464
HMGN1	1	complement(107997368..108003836)	ENSGALG00000016067	2509	3435	2912	3649	3882	2297	2394	2756	50.95	67.0578	66.4465	75.4459	63.189	56.0331	62.4838	55.9458	134.323	170.951	165.181	185.105	167.045	140.142	160.306	141.855	111.755	137.194	133.174	156.461	122.025	112.614	123.218	120.462
WRB	1	108004023..108010489	ENSGALG00000016070	360	532	485	535	660	336	318	403	5.56215	7.90189	8.42014	8.41613	8.17385	6.2362	6.31492	6.2243	14.6639	20.1444	20.9318	20.6488	21.6082	15.5971	16.2013	15.7822	16.035	21.2481	22.1805	22.9396	20.7461	16.473	16.3674	17.6147
LCA5L	1	complement(108011974..108023208)	ENSGALG00000016125	12	36	39	45	48	22	16	47	0.213929	0.616978	0.781251	0.816807	0.685918	0.471141	0.366613	0.83759	0.563996	1.57287	1.94213	2.00402	1.81327	1.17835	0.94057	2.12378	0.534499	1.43784	1.78358	1.9295	1.50881	1.07859	0.823515	2.05432
SH3BGR	1	108027675..108053510	ENSGALG00000016127	14	13	38	48	29	16	26	38	0.310181	0.276891	0.946036	1.0828	0.515024	0.425841	0.74039	0.841619	0.817751	0.705881	2.35177	2.65661	1.3615	1.06505	1.89952	2.13399	0.623582	0.51922	1.73785	2.05813	0.911573	0.784426	1.33821	1.66094
B3GALT5	1	108079422..108081075	ENSGALG00000016128	192	181	249	237	344	136	136	229	4.89664	4.43766	7.13565	6.15408	7.0323	4.16654	4.45796	5.83818	12.9093	11.313	17.7387	15.0989	18.5904	10.4208	11.4372	14.8032	8.55199	7.22914	11.3875	10.162	10.8131	6.66762	6.99988	10.0094
ENSGALG00000016132	1	108105290..108111733	ENSGALG00000016132	751	603	711	834	1443	542	423	923	27.0743	20.8984	28.8021	30.6127	41.699	23.4724	19.6001	33.2632	71.3779	53.2765	71.5997	75.1076	110.234	58.7057	50.2852	84.3415	33.4507	24.0838	32.5161	35.76	45.3586	26.5724	21.7717	40.3434
PCP4	1	108164030..108196164	ENSGALG00000022819	468	775	855	691	863	524	769	513	33.4137	53.1936	68.5934	50.2314	49.3892	44.9418	70.5676	36.6135	88.0909	135.607	170.518	123.242	130.564	112.402	181.046	92.8365	20.8455	30.9535	39.1017	29.6285	27.1271	25.69	39.5802	22.4227
DSCAM	1	complement(108236302..108412621)	ENSGALG00000016138	6	2	1	5	5	3	0	3	0.0306898	0.00983448	0.00574751	0.0260394	0.0205	0.0184333	0	0.0153394	0.0809096	0.0250711	0.0142878	0.063887	0.0541934	0.0461028	0	0.0388943	0.26725	0.07988	0.0457329	0.214389	0.157168	0.14708	0	0.131127
ENSGALG00000036516	1	complement(108608380..108614937)	ENSGALG00000036516	0	0	0	0	0	0	0	0	0	0	0	0	0	0	0	0	0	0	0	0	0	0	0	0	0	0	0	0	0	0	0	0
BACE2	1	108844363..108894770	ENSGALG00000034932	330	391	330	259	513	202	361	350	5.06647	5.77095	5.69302	4.04865	6.31323	3.72549	7.12359	5.37162	13.3571	14.7119	14.1524	9.93326	16.6895	9.31766	18.276	13.6202	14.6987	15.6165	15.0919	11.1053	16.1254	9.90338	18.5806	15.2981
FAM3B	1	108910671..108917505	ENSGALG00000016140	308	322	378	269	377	279	211	202	13.0917	13.1577	18.0541	11.6417	12.8449	14.2459	11.5273	8.58306	34.5146	33.5431	44.8809	28.5626	33.9563	35.6298	29.574	21.763	13.7188	12.8607	17.287	11.5341	11.8504	13.6784	10.8601	8.82921
MX1	1	108921073..108942022	ENSGALG00000016142	572	509	413	626	386	1046	137	472	6.25352	5.34965	5.07359	6.96821	3.38266	13.7373	1.92508	5.15841	16.4866	13.6379	12.6126	17.0963	8.94231	34.3577	4.93892	13.0796	25.4778	20.3295	18.8877	26.8415	12.1333	51.2819	7.05135	20.6306
TMPRSS2	1	complement(108944327..108958350)	ENSGALG00000016144	4769	5127	4562	6143	7770	5106	3793	6148	82.8935	85.6713	89.1016	108.716	108.257	106.614	84.7375	106.825	218.538	218.403	221.5	266.731	286.186	266.647	217.399	270.863	212.419	204.772	208.634	263.398	244.239	250.33	195.224	268.723
RIPK4	1	complement(109023686..109043492)	ENSGALG00000040189	845	898	646	905	1432	831	585	744	10.3851	10.6099	8.92125	11.3246	14.1072	12.2687	9.24085	9.14059	27.3791	27.0479	22.1775	27.7846	37.2935	30.6846	23.708	23.1767	37.6377	35.8661	29.5435	38.8043	45.0128	40.7411	30.1098	32.5195
PRDM15	1	complement(109072306..109103187)	ENSGALG00000019178	485	489	394	435	629	402	354	457	3.43004	3.32465	3.13106	3.13231	3.56575	3.41526	3.21781	3.23087	9.04285	8.47554	7.78356	7.68506	9.42631	8.54176	8.2555	8.19212	21.6027	19.5307	18.0188	18.6518	19.7717	19.7087	18.2203	19.975
C2CD2	1	complement(109107584..109141826)	ENSGALG00000016148	278	355	280	323	467	179	274	322	3.81125	4.67875	4.31338	4.50862	5.13194	2.94792	4.82807	4.4129	10.0479	11.9276	10.7227	11.0618	13.5667	7.37292	12.3867	11.1893	12.3826	14.1787	12.8052	13.8495	14.6795	8.77577	14.1027	14.0743
ZBTB21	1	complement(109155882..109161762)	ENSGALG00000016147	512	342	336	315	478	302	272	475	4.74939	3.04981	3.50223	2.97506	3.55417	3.36523	3.24292	4.4046	12.5211	7.7749	8.70625	7.29925	9.3957	8.41663	8.31992	11.1682	22.8053	13.6595	15.3663	13.5065	15.0252	14.806	13.9998	20.7618
UMODL1	1	109193368..109234694	ENSGALG00000016157	2	2	1	1	2	1	1	0	0.0157377	0.0151294	0.00884196	0.00801179	0.0126149	0.0094526	0.0101137	0	0.0414904	0.0385694	0.0219804	0.0196567	0.0333484	0.0236415	0.0259474	0	0.0890832	0.07988	0.0457329	0.0428777	0.0628671	0.0490266	0.0514697	0
ABCG1	1	109319985..109372658	ENSGALG00000016164	46	38	45	26	71	25	20	27	0.639952	0.508221	0.70346	0.368283	0.791755	0.417802	0.357618	0.37549	1.68715	1.29561	1.74875	0.903574	2.09306	1.04495	0.917492	0.952086	2.04891	1.51772	2.05798	1.11482	2.23178	1.22567	1.02939	1.18014
ENSGALG00000016165	1	complement(109383706..109388083)	ENSGALG00000016165	21	54	22	121	176	190	17	45	0.923535	2.28301	1.08716	5.41799	6.20425	10.0376	0.960911	1.9783	2.43478	5.82008	2.7026	13.2929	16.4014	25.1045	2.46528	5.01614	0.935374	2.15676	1.00612	5.1882	5.5323	9.31506	0.874985	1.9669
TMPRSS3	1	complement(109411574..109424647)	ENSGALG00000016169	2	0	2	1	0	0	1	0	0.0376548	0	0.0423114	0.0191694	0	0	0.0241986	0	0.099272	0	0.105183	0.0470317	0	0	0.0620831	0	0.0890832	0	0.0914659	0.0428777	0	0	0.0514697	0
UBASH3A	1	109426133..109450584	ENSGALG00000016173	176	165	222	143	290	145	159	122	0.589452	0.53125	0.83546	0.487629	0.778531	0.58337	0.684436	0.408452	1.55401	1.35432	2.07689	1.19639	2.0581	1.45904	1.75596	1.03566	7.83932	6.5901	10.1527	6.13151	9.11573	7.10886	8.18368	5.33249
RSPH1	1	complement(109456397..109462667)	ENSGALG00000043976	0	0	2	0	1	0	0	0	0	0	0.0789712	0	0.0281672	0	0	0	0	0	0.196316	0	0.0744621	0	0	0	0	0	0.0914659	0	0.0314335	0	0	0
SLC37A1	1	109473644..109505549	ENSGALG00000016185	1654	1561	1385	1180	1662	1060	1244	1616	26.5525	24.0908	24.9837	19.2872	21.3867	20.4416	25.6679	25.9332	70.0022	61.4149	62.1075	47.3208	56.5372	51.1257	65.8526	65.7557	73.6718	62.3463	63.3401	50.5957	52.2425	51.9682	64.0283	70.6337
PDE9A	1	109541318..109564484	ENSGALG00000016186	3045	3559	2746	3259	4540	3155	1957	2869	42.6261	47.8955	43.1942	46.4505	50.9432	53.0551	35.211	40.148	112.378	122.1	107.377	113.965	134.672	132.694	90.3361	101.798	135.629	142.146	125.583	139.738	142.708	154.679	100.726	125.401
WDR4	1	complement(109577831..109599269)	ENSGALG00000016187	815	918	699	1023	1046	671	624	870	7.0915	7.67895	6.83431	9.06305	7.29549	7.01363	6.97855	7.56737	18.6958	19.576	16.9896	22.236	19.2862	17.5415	17.9039	19.1877	36.3014	36.6649	31.9673	43.8639	32.8795	32.8969	32.1171	38.0268
NDUFV3	1	109599316..109606438	ENSGALG00000022813	796	1014	859	982	1153	773	834	971	15.7162	19.2465	19.0574	19.7408	18.2476	18.3339	21.1641	19.1645	41.4337	49.0652	47.3753	48.4335	48.2389	45.854	54.2979	48.5932	35.4551	40.4992	39.2846	42.1059	36.2429	37.8976	42.9257	42.4414
PKNOX1	1	109623483..109660483	ENSGALG00000016191	280	287	232	258	317	256	234	242	3.68305	3.62919	3.42906	3.45531	3.34234	4.0451	3.95608	3.18207	9.70988	9.25193	8.52436	8.47753	8.83573	10.117	10.1496	8.0684	12.4716	11.4628	10.61	11.0625	9.96443	12.5508	12.0439	10.5776
ENSGALG00000030952	1	complement(109672729..109674225)	ENSGALG00000030952	1	4	2	0	2	4	0	0	0.0274707	0.105635	0.0617357	0	0.0440394	0.131999	0	0	0.0724228	0.269296	0.15347	0	0.116421	0.330136	0	0	0.0445416	0.15976	0.0914659	0	0.0628671	0.196107	0	0
ENSGALG00000019175	1	complement(109677903..109696768)	ENSGALG00000019175	510	470	25	177	92	80	33	595	9.31374	8.25146	0.513016	3.29113	1.34674	1.75503	0.774583	10.8622	24.5545	21.0355	1.27532	8.07472	3.56021	4.38942	1.98724	27.5419	22.7162	18.7718	1.14332	7.58936	2.89189	3.92213	1.6985	26.0068
ENSGALG00000016196	1	complement(109708831..109726598)	ENSGALG00000016196	2	3	2	4	4	3	4	10	0.0331268	0.0477695	0.0372235	0.0674572	0.0531071	0.0596913	0.085155	0.165575	0.0873346	0.121779	0.0925347	0.165505	0.140392	0.149291	0.21847	0.419829	0.0890832	0.11982	0.0914659	0.171511	0.125734	0.14708	0.205879	0.43709
U2AF1	1	complement(109739113..109754964)	ENSGALG00000016198	2576	2947	2635	2909	3516	2456	2203	2561	19.9741	21.9675	22.9583	22.9659	21.8531	22.8765	21.9552	19.8507	52.6592	56.002	57.0725	56.3464	57.7703	57.2155	56.3273	50.3332	114.739	117.703	120.506	124.731	110.52	120.409	113.388	111.939
CRYAA	1	109772354..109775958	ENSGALG00000016199	0	0	1	0	1	1	0	0	0	0	0.0198383	0	0.0141517	0.0212084	0	0	0	0	0.0493164	0	0.0374111	0.0530433	0	0	0	0	0.0457329	0	0.0314335	0.0490266	0	0
SIK1	1	complement(109907383..109920133)	ENSGALG00000041988	1383	1401	999	1296	1557	945	1163	1426	7.96871	7.76038	6.46798	7.60307	7.19112	6.5409	8.61282	8.21354	21.0085	19.7836	16.0789	18.654	19.0103	16.3592	22.0967	20.8261	61.601	55.9559	45.6872	55.5695	48.942	46.3302	59.8592	62.329
ENSGALG00000016201	1	complement(109925075..109926219)	ENSGALG00000016201	1	0	0	0	0	0	0	0	0.108153	0	0	0	0	0	0	0	0.285131	0	0	0	0	0	0	0	0.0445416	0	0	0	0	0	0	0
HSF2BP	1	complement(109998577..110032898)	ENSGALG00000016202	41	23	44	56	33	30	40	30	0.77342	0.417098	0.932656	1.07557	0.498985	0.679818	0.96982	0.565715	2.03902	1.06331	2.31851	2.63888	1.3191	1.70026	2.48814	1.43442	1.82621	0.91862	2.01225	2.40115	1.03731	1.4708	2.05879	1.31127
RRP1B	1	110033196..110055218	ENSGALG00000035696	1246	1470	1464	1304	1767	1129	1087	1356	7.05132	7.9974	9.3096	7.51361	8.01552	7.67515	7.90646	7.6711	18.5899	20.3878	23.1429	18.4345	21.1896	19.196	20.2845	19.4507	55.4988	58.7118	66.953	55.9125	55.5431	55.3511	55.9475	59.2693
PDXK	1	110069292..110113597	ENSGALG00000016205	14882	12174	11705	15490	15421	10924	9323	12839	59.727	46.9701	52.7859	63.2964	49.6095	52.6661	48.0912	51.5093	157.463	119.741	131.222	155.296	131.146	131.721	123.381	130.606	662.868	486.23	535.304	664.176	484.737	535.567	479.852	561.179
AGPAT3	1	110164243..110252690	ENSGALG00000031932	855	745	692	814	886	611	490	557	19.2499	16.1249	17.5068	18.6597	15.9896	16.5251	14.1794	12.5361	50.7498	41.1074	43.5204	45.7812	42.2698	41.3302	36.3782	31.7863	38.0831	29.7553	31.6472	34.9025	27.8501	29.9553	25.2201	24.3459
ENSGALG00000022804	1	110273694..110314009	ENSGALG00000022804	1790	1461	1285	1529	1887	1230	1106	1655	13.7409	10.7818	11.0841	11.9505	11.6112	11.3425	10.9123	12.7	36.2261	27.4861	27.5543	29.3204	30.695	28.3681	27.9962	32.202	79.7295	58.3523	58.7668	65.56	59.3151	60.3028	56.9255	72.3383
ENSGALG00000045726	1	110323165..110332874	ENSGALG00000045726	496	542	366	585	645	423	314	527	7.22386	7.58868	5.98972	8.67485	7.52991	7.40063	5.87784	7.67262	19.0448	19.3459	14.89	21.2836	19.9059	18.5094	15.08	19.4545	22.0926	21.6475	16.7383	25.0835	20.2746	20.7383	16.1615	23.0346
C1H21ORF33	1	110334367..110341333	ENSGALG00000019171	3596	3118	2524	2952	4056	2619	2739	4141	57.3814	47.8307	45.2562	47.9607	51.879	50.2027	56.175	66.0544	151.278	121.935	112.503	117.671	137.146	125.56	144.121	167.486	160.172	124.533	115.43	126.575	127.494	128.401	140.975	180.999
ENSGALG00000045925	1	complement(110346977..110376641)	ENSGALG00000045925	651	923	848	882	1160	819	613	858	8.87905	12.1023	12.9963	12.2482	12.6819	13.4187	10.746	11.6982	23.4085	30.8524	32.3077	30.0507	33.5257	33.5609	27.5695	29.6617	28.9966	36.8646	38.7815	37.8181	36.4629	40.1528	31.5509	37.5023
ICOSLG	1	complement(110383415..110393891)	ENSGALG00000031637	589	512	514	503	773	427	474	606	13.261	11.0818	13.0036	11.5305	13.9503	11.5486	13.7164	13.6389	34.961	28.251	32.3259	28.2898	36.8787	28.8838	35.1903	34.5826	26.235	20.4493	23.5067	21.5675	24.2981	20.9344	24.3966	26.4876
CXorf36	1	110801925..110817459	ENSGALG00000016215	81	141	116	116	208	125	118	104	1.16805	1.95468	1.87963	1.70315	2.40427	2.16535	2.18705	1.49919	3.07942	4.98308	4.67261	4.17865	6.35586	5.41565	5.61102	3.80131	3.60787	5.63154	5.30502	4.97382	6.53818	6.12833	6.07342	4.54573
ENSGALG00000016217	1	complement(110833548..110980821)	ENSGALG00000016217	2194	2300	1820	1920	3146	1908	1780	2460	14.4264	14.5388	13.4471	12.8541	16.5815	15.0709	15.0432	16.1697	38.0333	37.0639	33.4285	31.5372	43.8343	37.6932	38.5944	40.9996	97.7243	91.862	83.2339	82.3252	98.8899	93.5428	91.616	107.524
FUNDC1	1	111018604..111035154	ENSGALG00000028187	495	630	551	659	727	492	429	569	4.22774	5.17277	5.28801	5.73069	4.97714	5.04787	4.70935	4.85804	11.1459	13.187	13.1456	14.0601	13.1574	12.625	12.0821	12.3179	22.0481	25.1622	25.1988	28.2564	22.8522	24.1211	22.0805	24.8704
EFHC2	1	111056475..111115975	ENSGALG00000016221	17	13	14	34	12	14	13	43	0.196447	0.144417	0.181787	0.400032	0.111153	0.194341	0.193081	0.496719	0.517908	0.368164	0.451908	0.981468	0.293841	0.486059	0.495362	1.25947	0.757207	0.51922	0.640261	1.45784	0.377202	0.686373	0.669106	1.87949
NDP	1	111184729..111204533	ENSGALG00000016222	15	32	57	50	64	47	44	30	0.244977	0.502416	1.04604	0.831425	0.837832	0.922089	0.923608	0.48978	0.645851	1.28081	2.60036	2.03988	2.21487	2.3062	2.36957	1.24188	0.668124	1.27808	2.60678	2.14389	2.01175	2.30425	2.26467	1.31127
MAOB	1	111228641..111277522	ENSGALG00000032836	539	502	270	220	400	191	241	354	10.0508	8.99898	5.65733	4.17688	5.97878	4.27843	5.77601	6.59871	26.4975	22.9412	14.0637	10.2479	15.8054	10.7006	14.8187	16.7316	24.0079	20.0499	12.3479	9.4331	12.5734	9.36409	12.4042	15.473
MAOA	1	complement(111259525..111332024)	ENSGALG00000016224	22358	23854	18496	21702	23081	17494	13226	25031	198.928	204.035	184.918	196.599	164.612	186.979	151.249	222.632	524.449	520.147	459.691	482.352	435.163	467.645	388.039	564.501	995.861	952.729	845.876	930.532	725.518	857.672	680.738	1094.08
ENSGALG00000022787	1	111368342..111373507	ENSGALG00000022787	1	0	0	0	0	1	0	0	0.0135946	0	0	0	0	0.0163308	0	0	0.0358405	0	0	0	0	0.0408443	0	0	0.0445416	0	0	0	0	0.0490266	0	0
CASK	1	111777485..111982403	ENSGALG00000042400	2027	2234	1940	2370	2805	1822	1829	2292	20.5026	21.7229	22.0493	24.4074	22.7421	22.1383	23.7777	23.1748	54.0525	55.3783	54.8128	59.8831	60.1204	55.3691	61.0031	58.7615	90.2858	89.226	88.7219	101.62	88.1711	89.3266	94.138	100.181
GPR82	1	complement(111881414..111882448)	ENSGALG00000044763	169	167	221	252	296	178	89	139	4.76814	4.52958	7.00635	7.23904	6.69416	6.03284	3.22739	3.92032	12.5706	11.5473	17.4172	17.7608	17.6965	15.0885	8.28008	9.9403	7.52753	6.66998	10.107	10.8052	9.30433	8.72674	4.5808	6.07554
GPR34	1	complement(111894570..111895715)	ENSGALG00000016227	354	319	366	373	556	271	222	199	9.0203	7.81425	10.4794	9.67709	11.3562	8.29521	7.27061	5.06893	23.7808	19.9209	26.0509	23.7425	30.0211	20.7468	18.6532	12.8527	15.7677	12.7409	16.7383	15.9934	17.477	13.2862	11.4263	8.69808
NYX	1	complement(111996403..112002409)	ENSGALG00000016228	39	39	29	21	31	17	17	34	0.710893	0.683413	0.593984	0.389742	0.452943	0.372245	0.39828	0.619532	1.87418	1.74223	1.4766	0.956223	1.19739	0.931006	1.02181	1.57087	1.73712	1.55766	1.32625	0.900432	0.97444	0.833453	0.874985	1.4861
DDX3X	1	complement(112021560..112038987)	ENSGALG00000016231	23422	31705	25914	28683	39586	24515	20824	24578	151.619	197.304	188.496	189.048	205.406	190.635	173.258	159.045	399.724	502.989	468.585	463.825	543.006	476.788	444.505	403.272	1043.25	1266.3	1185.12	1229.86	1244.33	1201.89	1071.8	1074.28
RPL8	1	112065359..112069618	ENSGALG00000016232	23166	22356	24931	28699	30733	21196	21040	25234	294.761	273.459	356.448	371.796	313.449	323.977	344.085	320.96	777.1	697.132	886.102	912.193	828.626	810.284	882.771	813.82	1031.85	892.899	1140.17	1230.55	966.047	1039.17	1082.92	1102.95
ENSGALG00000016236	1	complement(112079778..112151195)	ENSGALG00000016236	7940	6856	5521	6516	7994	5471	5302	7259	29.6191	24.5868	23.1423	24.7486	23.9033	24.5165	25.4209	27.0691	78.0869	62.6792	57.5299	60.7202	63.1902	61.3171	65.219	68.6358	353.66	273.829	252.492	279.391	251.28	268.225	272.892	317.283
MED14	1	112228091..112262154	ENSGALG00000016238	1142	1343	916	1087	1638	982	888	1171	7.68208	8.68495	6.92381	7.44493	8.8322	7.93531	7.6776	7.87435	20.2528	22.1406	17.212	18.266	23.3486	19.8467	19.6974	19.966	50.8665	53.6394	41.8914	46.6081	51.4881	48.1442	45.7051	51.1832
ATP6AP2	1	complement(112273190..112282375)	ENSGALG00000016241	2155	2800	2507	2680	3512	2340	2043	2519	31.7022	39.5985	41.4413	40.1416	41.4132	41.3521	38.6287	37.0438	83.5787	100.949	103.02	98.4865	109.479	103.424	99.1044	93.9275	95.9872	111.832	114.652	114.912	110.395	114.722	105.153	110.103
ENSGALG00000016245	1	112393549..112409925	ENSGALG00000016245	729	595	624	563	1097	597	552	809	4.63583	3.63744	4.45884	3.64525	5.59177	4.56053	4.51169	5.14273	12.2218	9.27297	11.0843	8.94353	14.7823	11.4061	11.575	13.0398	32.4708	23.7643	28.5373	24.1402	34.4826	29.2689	28.4113	35.3605
ENSGALG00000043274	1	112419085..112421481	ENSGALG00000043274	78	94	90	96	155	75	68	93	3.74007	4.33303	4.84914	4.68678	5.95743	4.32003	4.19077	4.45772	9.8602	11.0462	12.0546	11.4989	15.7489	10.8046	10.7517	11.3029	3.47424	3.75436	4.11596	4.11626	4.8722	3.677	3.49994	4.06493
MID1IP1	1	complement(112738605..112739753)	ENSGALG00000041078	8540	9575	9746	6183	7195	6500	6337	8868	217.04	233.938	278.321	159.993	146.573	198.443	206.998	225.296	572.198	596.379	691.884	392.538	387.478	496.317	531.066	571.256	380.385	382.426	445.713	265.113	226.164	318.673	326.163	387.611
ENSGALG00000016251	1	complement(112766328..112855804)	ENSGALG00000016251	465	613	476	481	1167	629	633	589	7.2964	9.24688	8.39267	7.68457	14.6781	11.8562	12.7661	9.23882	19.236	23.5732	20.8635	18.8539	38.8026	29.6531	32.7523	23.4258	20.7118	24.4832	21.7689	20.6242	36.6829	30.8378	32.5803	25.7446
OTC	1	complement(112898627..112924531)	ENSGALG00000016254	0	0	0	0	2	0	3	0	0	0	0	0	0.0364878	0	0.0877601	0	0	0	0	0	0.0964583	0	0.225154	0	0	0	0	0	0.0628671	0	0.154409	0
RPGR	1	112926210..112983863	ENSGALG00000036284	71	122	93	109	160	101	94	83	0.931398	1.53857	1.37087	1.45587	1.68244	1.59162	1.58491	1.08843	2.45551	3.92228	3.40788	3.57194	4.44765	3.98073	4.06619	2.7598	3.16245	4.87268	4.25316	4.67367	5.02937	4.95169	4.83815	3.62784
SRPX	1	112995140..113035746	ENSGALG00000043100	203	232	228	155	256	185	280	175	3.32652	3.65478	4.19824	2.5861	3.36261	3.64172	5.89729	2.86667	8.76995	9.31717	10.4365	6.34493	8.88932	9.10815	15.1299	7.26867	9.04195	9.26608	10.4271	6.64605	8.04699	9.06993	14.4115	7.64907
ENSGALG00000016258	1	complement(113045418..113063987)	ENSGALG00000016258	131	149	123	81	151	98	95	139	2.8719	3.14024	3.02999	1.80801	2.65349	2.58086	2.67684	3.0462	7.57139	8.00545	7.5323	4.43592	7.0147	6.45487	6.86759	7.72388	5.83495	5.95106	5.62515	3.4731	4.74646	4.80461	4.88962	6.07554
ENSGALG00000044139	1	complement(113065907..113089597)	ENSGALG00000044139	105	71	77	59	104	60	55	89	3.06921	1.99514	2.52909	1.75593	2.43676	2.10682	2.06633	2.60059	8.09156	5.08624	6.28712	4.30813	6.44175	5.26929	5.3013	6.59401	4.67687	2.83574	3.52144	2.52979	3.26909	2.9416	2.83083	3.8901
DYNLT3	1	113133105..113139987	ENSGALG00000016259	2017	2158	2200	2592	2862	1680	1829	2252	24.0208	24.7066	29.4403	31.4293	27.3208	24.0343	27.996	26.8099	63.3277	62.9846	73.1862	77.1111	72.2246	60.1111	71.8254	67.9787	89.8404	86.1905	100.612	111.139	89.9628	82.3648	94.138	98.4326
CYBB	1	complement(113150989..113183645)	ENSGALG00000016261	152	151	211	92	174	79	85	102	1.81167	1.73018	2.82589	1.11646	1.66237	1.13111	1.30213	1.21529	4.77624	4.41077	7.02495	2.7392	4.3946	2.82896	3.3407	3.08148	6.77032	6.03094	9.64965	3.94475	5.46944	3.87311	4.37492	4.45831
XK	1	complement(113199118..113214148)	ENSGALG00000016262	2	1	1	1	2	1	3	2	0.0280917	0.0135029	0.0157828	0.014301	0.0225175	0.0168728	0.0541588	0.0280817	0.0740601	0.034423	0.0392349	0.0350872	0.0595267	0.0421999	0.138948	0.0712033	0.0890832	0.03994	0.0457329	0.0428777	0.0628671	0.0490266	0.154409	0.0874179
LANCL3	1	complement(113222082..113251614)	ENSGALG00000016265	16	19	20	15	15	6	9	11	0.337587	0.385389	0.474169	0.322237	0.253688	0.152075	0.244067	0.232009	0.890005	0.982474	1.17875	0.790602	0.670643	0.380348	0.626169	0.588276	0.712666	0.75886	0.914659	0.643166	0.471503	0.29416	0.463227	0.480799
PRRG1	1	complement(113283937..113314035)	ENSGALG00000016266	496	730	602	632	616	528	432	550	3.07709	4.35372	4.19655	3.99203	3.06324	3.93489	3.44462	3.41088	8.11234	11.099	10.4323	9.79435	8.0979	9.84137	8.8374	8.64855	22.0926	29.1562	27.5312	27.0987	19.3631	25.8861	22.2349	24.0399
ENSGALG00000040488	1	113326215..113331457	ENSGALG00000040488	0	0	0	0	0	0	0	0	0	0	0	0	0	0	0	0	0	0	0	0	0	0	0	0	0	0	0	0	0	0	0	0
ENSGALG00000033911	1	113343166..113348383	ENSGALG00000033911	0	0	0	0	0	0	0	0	0	0	0	0	0	0	0	0	0	0	0	0	0	0	0	0	0	0	0	0	0	0	0	0
ENSGALG00000032406	1	113358812..113364043	ENSGALG00000032406	0	0	0	2	0	0	0	0	0	0	0	0.0279303	0	0	0	0	0	0	0	0.0685262	0	0	0	0	0	0	0	0.0857554	0	0	0	0
ENSGALG00000045985	1	113366191..113369659	ENSGALG00000045985	1	1	0	1	1	0	0	4	0.0274965	0.0264336	0	0.027996	0.0220404	0	0	0.109947	0.072491	0.0673875	0	0.0686876	0.0582655	0	0	0.278779	0.0445416	0.03994	0	0.0428777	0.0314335	0	0	0.174836
ENSGALG00000016268	1	113403070..113433885	ENSGALG00000016268	0	0	0	1	0	0	1	0	0	0	0	0.0105544	0	0	0.0133234	0	0	0	0	0.025895	0	0	0.034182	0	0	0	0	0.0428777	0	0	0.0514697	0
ENSGALG00000045430	1	113452551..113458229	ENSGALG00000045430	0	0	0	0	0	0	0	1	0	0	0	0	0	0	0	0.0635967	0	0	0	0	0	0	0	0.161255	0	0	0	0	0	0	0	0.043709
ENSGALG00000042515	1	113494211..113499362	ENSGALG00000042515	0	0	0	0	0	0	0	0	0	0	0	0	0	0	0	0	0	0	0	0	0	0	0	0	0	0	0	0	0	0	0	0
ENSGALG00000033692	1	113630516..113665856	ENSGALG00000033692	0	0	0	0	1	0	0	0	0	0	0	0	0.0211445	0	0	0	0	0	0	0	0.055897	0	0	0	0	0	0	0	0.0314335	0	0	0
ENSGALG00000044750	1	complement(113815854..113821731)	ENSGALG00000044750	0	0	0	0	0	0	1	0	0	0	0	0	0	0	0.0146495	0	0	0	0	0	0	0	0.0375842	0	0	0	0	0	0	0	0.0514697	0
TMEM47	1	113937248..113961367	ENSGALG00000027198	229	292	240	277	459	242	290	263	3.92897	4.8162	4.62691	4.83883	6.31245	4.98768	6.395	4.5107	10.3582	12.278	11.5021	11.872	16.6874	12.4745	16.4068	11.4372	10.2	11.6625	10.9759	11.8771	14.428	11.8644	14.9262	11.4955
ENSGALG00000045937	1	complement(113991509..113995521)	ENSGALG00000045937	0	0	0	0	0	0	2	0	0	0	0	0	0	0	0.0541588	0	0	0	0	0	0	0	0.138948	0	0	0	0	0	0	0	0.102939	0
ENSGALG00000046613	1	complement(114253125..114257139)	ENSGALG00000046613	0	2	0	0	0	0	0	0	0	0.0405087	0	0	0	0	0	0	0	0.103269	0	0	0	0	0	0	0	0.07988	0	0	0	0	0	0
DMD	1	114486908..115483002	ENSGALG00000016281	2213	2374	2460	2418	3215	1540	2196	2222	4.74363	4.89203	5.92519	5.27721	5.52399	3.96543	6.05009	4.76123	12.506	12.4713	14.7295	12.9475	14.6031	9.91777	15.5219	12.0725	98.5706	94.8176	112.503	103.678	101.059	75.501	113.027	97.1213
TAB3	1	115685927..115698891	ENSGALG00000016284	926	899	781	797	1173	712	647	999	13.8882	12.9621	13.1621	12.1706	14.1019	12.8279	12.4721	14.9778	36.6145	33.0444	32.7199	29.8604	37.2793	32.0834	31.998	37.9773	41.2455	35.9061	35.7174	34.1735	36.8715	34.907	33.3009	43.6652
ENSGALG00000016285	1	complement(115734786..115768467)	ENSGALG00000016285	4287	4792	2992	4411	4107	3702	2495	5695	52.5109	56.4276	41.1808	55.0112	40.324	54.4719	39.2796	69.7325	138.438	143.851	102.372	134.969	106.599	136.237	100.774	176.812	190.95	191.392	136.833	189.134	129.098	181.497	128.417	248.922
CXorf21	1	115794507..115795376	ENSGALG00000016286	6	3	4	3	8	5	7	1	0.201388	0.0968018	0.150862	0.102523	0.215236	0.201601	0.301982	0.0335528	0.530934	0.246778	0.375031	0.251539	0.568993	0.504216	0.774754	0.0850757	0.26725	0.11982	0.182932	0.128633	0.251468	0.245133	0.360288	0.043709
ENSGALG00000044858	1	complement(115843688..115847698)	ENSGALG00000044858	0	0	0	0	0	0	0	0	0	0	0	0	0	0	0	0	0	0	0	0	0	0	0	0	0	0	0	0	0	0	0	0
NR0B1	1	115909469..115911505	ENSGALG00000016287	56	57	56	91	191	137	142	58	1.451	1.41982	1.63044	2.4007	3.96693	4.26422	4.72897	1.50228	3.82536	3.61955	4.05313	5.89006	10.4869	10.665	12.1325	3.80916	2.49433	2.27658	2.56104	3.90187	6.00381	6.71665	7.30869	2.53512
ENSGALG00000045272	1	116001946..116005949	ENSGALG00000045272	0	0	0	0	0	0	0	0	0	0	0	0	0	0	0	0	0	0	0	0	0	0	0	0	0	0	0	0	0	0	0	0
IL1RAPL1	1	complement(116055337..116671490)	ENSGALG00000016288	0	1	0	0	2	0	0	0	0	0.0130146	0	0	0.0217032	0	0	0	0	0.0331782	0	0	0.0573741	0	0	0	0	0.03994	0	0	0.0628671	0	0	0
ENSGALG00000044129	1	complement(117435791..117441378)	ENSGALG00000044129	2	3	2	0	5	4	0	1	0.032231	0.0464777	0.0362169	0	0.0645887	0.0774362	0	0.0161098	0.0849729	0.118486	0.0900324	0	0.170745	0.193672	0	0.0408476	0.0890832	0.11982	0.0914659	0	0.157168	0.196107	0	0.043709
ARX	1	117839213..117843292	ENSGALG00000042604	37	12	18	24	21	24	13	20	0.703417	0.219317	0.384522	0.464559	0.320017	0.548103	0.317654	0.38009	1.85447	0.559105	0.95589	1.13978	0.845988	1.37084	0.814961	0.963748	1.64804	0.47928	0.823193	1.02907	0.660104	1.17664	0.669106	0.874179
POLA1	1	complement(117847142..118037119)	ENSGALG00000016312	617	581	483	434	894	319	601	518	4.01185	3.63174	3.52894	2.87321	4.6595	2.49167	5.02266	3.36693	10.5767	9.25842	8.77265	7.04935	12.3177	6.2318	12.8859	8.53712	27.4822	23.2051	22.089	18.6089	28.1016	15.6395	30.9333	22.6412
PCYT1B	1	118051229..118071937	ENSGALG00000016318	0	3	0	1	2	0	2	3	0	0.175453	0	0.0619412	0.0975289	0	0.156384	0.182443	0	0.447284	0	0.151971	0.257825	0	0.401212	0.462599	0	0.11982	0	0.0428777	0.0628671	0	0.102939	0.131127
ENSGALG00000042121	1	118079947..118080147	ENSGALG00000042121	0	0	0	0	0	0	1	0	0	0	0	0	0	0	0.186727	0	0	0	0	0	0	0	0.479059	0	0	0	0	0	0	0	0.0514697	0
PDK3	1	complement(118089639..118139548)	ENSGALG00000016323	1614	1598	1350	1651	2299	1556	1576	1868	19.8697	18.9123	18.6749	20.6944	22.6866	23.0111	24.937	22.9885	52.3839	48.2132	46.4244	50.7733	59.9736	57.5521	63.9774	58.2891	71.8901	63.8241	61.7395	70.7911	72.2657	76.2855	81.1162	81.6483
ENSGALG00000016326	1	complement(118163053..118171318)	ENSGALG00000016326	213	162	275	192	536	142	133	130	6.20746	4.53867	9.00543	5.6971	12.5211	4.97122	4.9818	3.78724	16.3652	11.5705	22.3868	13.9777	33.1004	12.4333	12.7811	9.60286	9.48736	6.47028	12.5766	8.23252	16.8484	6.96178	6.84547	5.68216
ENSGALG00000016327	1	complement(118189388..118203784)	ENSGALG00000016327	770	907	779	816	1292	845	741	797	9.31828	10.5519	10.593	10.0543	12.5329	12.2841	11.5256	9.64159	24.5664	26.9001	26.3334	24.6681	33.1315	30.7231	29.5696	24.447	34.297	36.2256	35.626	34.9882	40.6121	41.4275	38.139	34.836
EIF2S3	1	complement(118225012..118238163)	ENSGALG00000016340	4951	5952	5931	6984	8902	5670	5275	5791	75.1433	86.8439	101.149	107.924	108.3	103.376	102.901	87.861	198.105	221.392	251.449	264.79	286.298	258.55	263.999	222.779	220.525	237.723	271.242	299.458	279.821	277.981	271.503	253.119
KLHL15	1	118238433..118307972	ENSGALG00000016345	1818	1977	1645	1894	2554	1801	1521	1845	7.26138	7.59121	7.38293	7.70236	8.1769	8.64131	7.80827	7.3666	19.1437	19.3523	18.3534	18.8976	21.6162	21.6124	20.0326	18.6786	80.9766	78.9614	75.2307	81.2104	80.2813	88.297	78.2854	80.643
SAT1	1	complement(118319065..118321891)	ENSGALG00000016348	22316	28418	16041	27616	33488	25076	18643	21744	568.636	696.13	459.289	716.468	683.989	767.567	610.567	553.863	1499.13	1774.65	1141.76	1757.84	1808.18	1919.73	1566.45	1404.36	993.99	1135.01	733.602	1184.11	1052.65	1229.39	959.549	950.408
ACOT9	1	118326154..118347013	ENSGALG00000016351	2095	4162	2483	2543	3898	2974	2848	2341	16.8763	32.2311	22.4754	20.8573	25.1697	28.779	29.4873	18.8513	44.4923	82.167	55.8722	51.173	66.538	71.9779	75.6514	47.7989	93.3147	166.23	113.555	109.038	122.528	145.805	146.586	102.323
PRDX4	1	complement(118350789..118359176)	ENSGALG00000016357	1111	1427	1336	1306	1186	948	1191	886	29.7912	36.7856	40.2548	35.6563	25.4919	30.5368	41.0475	23.7494	78.5407	93.7777	100.07	87.4818	67.3896	76.3742	105.31	60.2186	49.4857	56.9944	61.0992	55.9983	37.2802	46.4773	61.3004	38.7261
PTCHD1	1	complement(118434845..118464479)	ENSGALG00000016358	113	163	126	113	143	75	110	99	1.03021	1.4286	1.29078	1.04892	1.04502	0.821385	1.28896	0.902248	2.716	3.64195	3.20878	2.5735	2.76258	2.05433	3.3069	2.28772	5.0332	6.51022	5.76235	4.84518	4.495	3.677	5.66166	4.32719
PHEX	1	complement(118890050..118981624)	ENSGALG00000016375	3	0	3	3	11	10	3	2	0.0407271	0	0.0457636	0.0414669	0.119701	0.163081	0.052346	0.0271417	0.107372	0	0.113765	0.101738	0.316438	0.407874	0.134297	0.06882	0.133625	0	0.137199	0.128633	0.345769	0.490266	0.154409	0.0874179
SMS	1	complement(118998074..119041245)	ENSGALG00000016379	908	1096	848	1011	1360	971	729	759	10.6785	12.3913	11.2062	12.1058	12.8206	13.7178	11.0193	8.92303	28.1526	31.5891	27.8577	29.7014	33.8921	34.309	28.2706	22.6251	40.4438	43.7742	38.7815	43.3494	42.7496	47.6049	37.5214	33.1751
MBTPS2	1	complement(119066345..119095570)	ENSGALG00000016382	147	131	120	138	158	89	116	131	2.89063	2.47643	2.65152	2.76295	2.49044	2.10235	2.9318	2.57509	7.62078	6.31318	6.59146	6.77884	6.58365	5.25811	7.52171	6.52935	6.54762	5.23214	5.48795	5.91712	4.9665	4.36337	5.97048	5.72587
SMPX	1	119106720..119149445	ENSGALG00000019157	153	182	236	251	311	109	186	172	6.1119	6.98933	10.5934	10.2089	9.95836	5.2306	9.54988	6.86845	16.1132	17.8179	26.3343	25.0472	26.3257	13.082	24.5008	17.4155	6.81486	7.26908	10.793	10.7623	9.77583	5.3439	9.57336	7.51794
KLHL34	1	119167856..119169643	ENSGALG00000016388	4	1	0	0	0	0	0	2	0.0653273	0.0157005	0	0	0	0	0	0.032652	0.172227	0.0400254	0	0	0	0	0	0.0827918	0.178166	0.03994	0	0	0	0	0	0.0874179
ENSGALG00000033942	1	complement(119173093..119176632)	ENSGALG00000033942	0	1	1	1	2	0	2	0	0	0.067808	0.0792573	0.0718158	0.113077	0	0.181314	0	0	0.172863	0.197027	0.176199	0.298927	0	0.465173	0	0	0.03994	0.0457329	0.0428777	0.0628671	0	0.102939	0
ENSGALG00000016391	1	complement(119187223..119376750)	ENSGALG00000016391	17	17	19	18	30	15	14	10	0.18184	0.174811	0.228366	0.196034	0.257219	0.19274	0.192472	0.106926	0.479397	0.445646	0.567699	0.480964	0.679978	0.482053	0.493799	0.27112	0.757207	0.67898	0.868926	0.771799	0.943006	0.7354	0.720575	0.43709
RPS6KA3	1	119730475..119820379	ENSGALG00000016406	1324	1346	1351	1265	1724	975	1232	1421	13.5801	13.2721	15.5707	13.2106	14.1741	12.0132	16.2415	14.5698	35.8022	33.8346	38.7075	32.412	37.4702	30.0458	41.6685	36.9429	58.9731	53.7592	61.7852	54.2403	54.1914	47.801	63.4106	62.1104
EIF1AY	1	119802142..119834931	ENSGALG00000016410	2702	3087	2620	2953	3345	2460	2455	2932	37.2355	40.8966	40.5705	41.4336	36.9496	40.7236	43.4833	40.3906	98.1664	104.258	100.855	101.656	97.679	101.852	111.559	102.414	120.351	123.295	119.82	126.618	105.145	120.606	126.358	128.155
MAP7D2	1	119900726..119932095	ENSGALG00000016415	1539	1868	1396	1795	2339	1499	1423	1709	22.9056	26.7276	23.3467	27.2011	27.9046	26.8006	27.2213	25.4267	60.3877	68.1368	58.0381	66.7372	73.7679	67.0299	69.8378	64.4715	68.5495	74.6079	63.8432	76.9655	73.523	73.4909	73.2414	74.6986
BCLAF3	1	119952518..119973810	ENSGALG00000016418	386	475	455	444	626	452	430	483	4.37566	5.17641	5.79569	5.12457	5.68818	6.1551	6.26506	5.47329	11.5359	13.1963	14.4076	12.573	15.0371	15.3943	16.0734	13.878	17.1931	18.9715	20.8085	19.0377	19.6774	22.16	22.132	21.1114
SH3KBP1	1	119981518..120203381	ENSGALG00000016420	1067	1231	1167	1021	1521	991	1000	853	10.2056	11.3191	12.5425	9.94305	11.6613	11.3865	12.2935	8.15586	26.9058	28.8559	31.1796	24.395	30.8275	28.4782	31.5397	20.6798	47.5259	49.1661	53.3703	43.7781	47.8104	48.5854	51.4697	37.2837
MAP3K15	1	120215624..120287272	ENSGALG00000016426	2170	2352	1727	1978	2767	1925	1708	2078	16.0139	16.686	14.3208	14.8621	16.3677	17.065	16.2003	15.3295	42.2185	42.5378	35.6003	36.4639	43.2692	42.6806	41.563	38.8691	96.6553	93.9389	78.9808	84.8121	86.9766	94.3763	87.9102	90.8272
PDHA1	1	complement(120288369..120300358)	ENSGALG00000016430	1553	1896	1691	1883	2577	1508	1472	1758	29.2201	34.2948	35.7513	36.0727	38.8658	34.0841	35.5974	33.0655	77.035	87.4279	88.8748	88.5037	102.745	85.2463	91.3274	83.8401	69.1731	75.7262	77.3344	80.7387	81.0042	73.9322	75.7634	76.8403
ADGRG2	1	120395079..120415594	ENSGALG00000016511	48	38	58	51	125	47	60	20	0.472577	0.359661	0.641647	0.511234	0.986469	0.555865	0.759246	0.196837	1.24589	0.916887	1.59508	1.2543	2.6078	1.39025	1.94789	0.499096	2.138	1.51772	2.65251	2.18676	3.92919	2.30425	3.08818	0.874179
PHKA2	1	120418832..120455800	ENSGALG00000016518	403	313	357	465	690	428	439	286	3.21007	2.39681	3.19533	3.77121	4.40556	4.09538	4.49443	2.2773	8.46294	6.1102	7.94333	9.25259	11.6464	10.2428	11.5307	5.77429	17.9503	12.5012	16.3267	19.9381	21.6891	20.9834	22.5952	12.5008
PPEF1	1	complement(120458892..120488125)	ENSGALG00000016522	4	15	16	13	17	10	11	5	0.0481671	0.173644	0.216495	0.159387	0.16409	0.144654	0.170248	0.0601874	0.126986	0.442673	0.538189	0.391052	0.433784	0.361788	0.436783	0.15261	0.178166	0.5991	0.731727	0.55741	0.53437	0.490266	0.566166	0.218545
RS1	1	120497468..120509403	ENSGALG00000016523	0	0	0	0	0	0	0	0	0	0	0	0	0	0	0	0	0	0	0	0	0	0	0	0	0	0	0	0	0	0	0	0
CDKL5	1	complement(120520180..120619365)	ENSGALG00000016529	41	27	20	32	50	17	29	31	0.344236	0.217929	0.188686	0.273553	0.3365	0.17146	0.312947	0.260183	0.907534	0.555569	0.469059	0.671155	0.889563	0.42883	0.802885	0.659716	1.82621	1.07838	0.914659	1.37209	1.57168	0.833453	1.49262	1.35498
SCML2	1	120694801..120730607	ENSGALG00000016537	41	36	33	26	31	25	32	32	0.655311	0.553153	0.592673	0.423112	0.397162	0.480003	0.657376	0.51128	1.72764	1.41016	1.47334	1.0381	1.04993	1.20051	1.68654	1.29639	1.82621	1.43784	1.50919	1.11482	0.97444	1.22567	1.64703	1.39869
RAI2	1	complement(120743006..120744652)	ENSGALG00000016538	950	1157	941	1000	1345	834	954	983	16.8435	19.7206	18.7472	18.0521	19.115	17.7629	21.7399	17.4224	44.4057	50.274	46.604	44.2903	50.5318	44.4261	55.775	44.1758	42.3145	46.2106	43.0347	42.8777	42.2781	40.8882	49.1021	42.9659
ENSGALG00000016541	1	complement(120913925..120925784)	ENSGALG00000016541	33	30	28	25	58	31	23	45	0.696777	0.608948	0.664317	0.53745	0.981636	0.786289	0.624177	0.949812	1.83696	1.5524	1.65144	1.31862	2.59503	1.96655	1.60137	2.40833	1.46987	1.1982	1.28052	1.07194	1.82315	1.51983	1.1838	1.9669
NHS	1	complement(120947280..120971835)	ENSGALG00000016543	363	488	374	316	725	471	396	406	2.40528	3.10855	2.78463	2.13189	3.8507	3.74904	3.37252	2.68925	6.34121	7.92466	6.92238	5.23054	10.1796	9.37657	8.65241	6.8188	16.1686	19.4907	17.1041	13.5494	22.7893	23.0916	20.382	17.7458
REPS2	1	complement(121281606..121375643)	ENSGALG00000016545	487	596	610	647	973	478	673	427	2.60793	3.06826	3.67057	3.52768	4.17659	3.07493	4.63214	2.28581	6.87546	7.82194	9.12475	8.65509	11.0411	7.69057	11.8841	5.79585	21.6918	23.8042	27.8971	27.7419	30.5848	23.4347	34.6391	18.6637
RBBP7	1	121402901..121411162	ENSGALG00000016546	224	273	280	207	303	192	203	201	3.57828	4.19245	5.02599	3.36678	3.87982	3.68441	4.16795	3.20972	9.43366	10.6878	12.4942	8.26032	10.2566	9.21491	10.6931	8.13851	9.97732	10.9036	12.8052	8.87569	9.52436	9.41312	10.4483	8.7855
TXLNG	1	complement(121415179..121422972)	ENSGALG00000016547	290	350	225	371	438	300	238	237	7.90698	9.17402	6.89339	10.2992	9.57259	9.82594	8.34046	6.45961	20.8457	23.3874	17.1364	25.2689	25.3058	24.5752	21.398	16.3789	12.9171	13.979	10.2899	15.9076	13.7679	14.708	12.2498	10.359
SYAP1	1	complement(121439282..121469678)	ENSGALG00000016548	1218	1487	1491	1739	2452	1372	1293	1657	16.3452	19.1837	22.4832	23.7608	26.3758	22.1176	22.3019	22.2285	43.092	48.9053	55.8915	58.2966	69.7265	55.3173	57.2169	56.3623	54.2517	59.3908	68.1878	74.5644	77.075	67.2646	66.5503	72.4257
CTPS2	1	121458301..121526563	ENSGALG00000016549	225	222	305	291	543	203	217	359	2.27582	2.15868	3.46651	2.99686	4.40248	2.46656	2.82108	3.6299	5.9999	5.50313	8.61747	7.35273	11.6383	6.16901	7.23765	9.20391	10.0219	8.86668	13.9485	12.4774	17.0684	9.95241	11.1689	15.6915
ENSGALG00000026840	1	complement(121635626..121646562)	ENSGALG00000026840	0	0	0	0	0	0	0	1	0	0	0	0	0	0	0	0.00727046	0	0	0	0	0	0	0	0.0184348	0	0	0	0	0	0	0	0.043709
GRPR	1	complement(121714896..121737453)	ENSGALG00000027960	6	9	16	3	13	5	8	2	0.076711	0.110618	0.22986	0.0390522	0.133227	0.0767921	0.131461	0.0255612	0.202238	0.282001	0.571414	0.0958137	0.352195	0.192061	0.337271	0.0648125	0.26725	0.35946	0.731727	0.128633	0.408636	0.245133	0.411757	0.0874179
AP1S2	1	121850197..121884181	ENSGALG00000016551	1654	1907	1833	1766	2726	1725	1527	1639	11.3484	12.5785	14.1319	12.337	14.9923	14.2177	13.466	11.2415	29.9187	32.0666	35.1308	30.2686	39.6333	35.5593	34.548	28.5038	73.6718	76.1656	83.8285	75.722	85.6878	84.571	78.5942	71.639
ZRSR2	1	complement(121888751..121904959)	ENSGALG00000016552	567	775	645	776	915	599	550	611	9.39679	12.3474	12.0114	13.0941	12.1551	11.9251	11.7155	10.1224	24.7734	31.4774	29.8594	32.1261	32.133	29.8254	30.0567	25.6661	25.2551	30.9535	29.4977	33.2731	28.7617	29.367	28.3083	26.7062
CLTRN	1	121910925..121929473	ENSGALG00000029168	10	7	8	7	10	10	7	11	0.283508	0.190784	0.254855	0.20206	0.227252	0.340569	0.255072	0.311747	0.747431	0.486367	0.633548	0.495751	0.600757	0.851783	0.654404	0.790461	0.445416	0.27958	0.365863	0.300144	0.314335	0.490266	0.360288	0.480799
ACE2	1	121938421..121960170	ENSGALG00000016554	43724	45093	36821	32884	49480	41678	30934	41913	526.081	521.58	497.812	402.843	477.205	602.392	478.375	504.111	1386.94	1329.67	1237.52	988.365	1261.53	1506.62	1227.3	1278.21	1947.54	1801.01	1683.93	1409.99	1555.33	2043.33	1592.16	1831.97
BMX	1	complement(121963490..121989828)	ENSGALG00000016557	167	148	318	293	211	118	96	299	2.57613	2.19479	5.51209	4.6019	2.60901	2.18662	1.90337	4.61071	6.79164	5.59519	13.7026	11.2907	6.89712	5.46887	4.88321	11.6908	7.43845	5.91112	14.5431	12.5632	6.63248	5.78514	4.94109	13.069
VEGFD	1	122045082..122076797	ENSGALG00000016558	462	742	678	733	964	693	661	531	5.69481	8.79266	9.39084	9.1994	9.52482	10.2615	10.4722	6.543	15.0136	22.4152	23.3449	22.5705	25.1796	25.6646	26.8671	16.5903	20.5782	29.6355	31.0069	31.4294	30.3019	33.9755	34.0215	23.2095
PIGA	1	122087633..122096924	ENSGALG00000016559	294	373	299	317	431	297	238	333	1.94852	2.37654	2.22672	2.13912	2.28969	2.36458	2.02738	2.20621	5.13702	6.05854	5.53546	5.24828	6.05298	5.91395	5.20137	5.59403	13.0952	14.8976	13.6741	13.5922	13.5479	14.5609	12.2498	14.5551
ASB11	1	122100794..122112588	ENSGALG00000016562	1	1	0	0	0	0	0	0	0.0301355	0.0289706	0	0	0	0	0	0	0.0794483	0.073855	0	0	0	0	0	0	0.0445416	0.03994	0	0	0	0	0	0
ASB9	1	122126014..122139309	ENSGALG00000016563	33	11	27	36	32	19	21	23	0.285017	0.0913332	0.262034	0.316576	0.221539	0.197129	0.233118	0.198578	0.751411	0.232837	0.651396	0.776712	0.585654	0.493031	0.59808	0.503509	1.46987	0.43934	1.23479	1.5436	1.00587	0.931506	1.08086	1.00531
MOSPD2	1	complement(122310136..122344651)	ENSGALG00000016568	566	710	683	718	1018	634	666	708	4.55441	5.49228	6.17552	5.88245	6.56607	6.12837	6.88794	5.695	12.0071	14.0015	15.3518	14.4325	17.3579	15.3274	17.6714	14.4401	25.2105	28.3574	31.2356	30.7862	31.9993	31.0829	34.2788	30.9459
FANCB	1	122344605..122359048	ENSGALG00000016569	36	42	63	39	45	28	25	22	0.347635	0.389896	0.683594	0.383445	0.348318	0.324802	0.310285	0.212368	0.916493	0.993965	1.69936	0.940774	0.920803	0.812348	0.796055	0.538475	1.6035	1.67748	2.88117	1.67223	1.41451	1.37275	1.28674	0.961597
GLRA2	1	complement(122392119..122516386)	ENSGALG00000016571	0	0	1	0	0	0	0	0	0	0	0.0234208	0	0	0	0	0	0	0	0.0582222	0	0	0	0	0	0	0	0.0457329	0	0	0	0	0
ENSGALG00000028703	1	complement(122721554..122724376)	ENSGALG00000028703	0	0	0	0	0	0	0	0	0	0	0	0	0	0	0	0	0	0	0	0	0	0	0	0	0	0	0	0	0	0	0	0
GEMIN8	1	122783325..122810787	ENSGALG00000016574	241	279	281	305	370	252	264	239	3.44976	3.83933	4.51976	4.44519	4.24538	4.33324	4.85709	3.41991	9.09485	9.78763	11.2358	10.9062	11.223	10.8377	12.4612	8.67147	10.7345	11.1433	12.851	13.0777	11.6304	12.3547	13.588	10.4464
GPM6B	1	122827173..122931852	ENSGALG00000016575	70	99	54	80	133	44	71	56	0.568593	0.773068	0.492872	0.661625	0.865959	0.429335	0.741245	0.454712	1.49902	1.97079	1.22524	1.62328	2.28923	1.07379	1.90171	1.15296	3.11791	3.95406	2.46958	3.43022	4.18066	2.15717	3.65435	2.4477
OFD1	1	complement(122934649..122963767)	ENSGALG00000016576	395	743	560	699	719	588	443	496	3.04662	5.50921	4.85341	5.4893	4.44522	5.44803	4.39163	3.82427	8.03203	14.0447	12.0652	13.4679	11.7513	13.6258	11.267	9.69674	17.5939	29.6754	25.6104	29.9715	22.6007	28.8277	22.8011	21.6796
TRAPPC2	1	122963819..122969710	ENSGALG00000016578	1342	1942	1539	1969	1667	1468	972	1236	19.8925	27.6735	25.6337	29.7167	19.8068	26.1398	18.5184	18.3147	52.4439	70.5483	63.7234	72.9092	52.3607	65.3771	47.51	46.4384	59.7748	77.5635	70.383	84.4262	52.3997	71.9711	50.0285	54.0243
RAB9A	1	complement(122970659..122978786)	ENSGALG00000016579	1304	1452	1247	1387	1682	1178	1083	1174	16.7304	17.9092	17.9777	18.1186	17.2981	18.1558	17.8591	15.0572	44.1077	45.656	44.6911	44.4536	45.7288	45.4087	45.8185	38.1787	58.0822	57.9929	57.029	59.4714	52.8712	57.7534	55.7417	51.3143
TCEANC	1	complement(122983591..122993513)	ENSGALG00000016581	345	493	370	489	499	377	325	361	5.5415	7.61262	6.67802	7.99716	6.42468	7.27428	6.70953	5.79643	14.6094	19.4069	16.601	19.6208	16.9841	18.1934	17.2137	14.6973	15.3669	19.6904	16.9212	20.9672	15.6853	18.483	16.7276	15.7789
ENSGALG00000045698	1	123009518..123013685	ENSGALG00000045698	0	1	4	1	1	4	0	3	0	0.0188028	0.0879103	0.0199141	0.0156778	0.0939816	0	0.0586555	0	0.047934	0.218538	0.0488588	0.0414454	0.235053	0	0.148726	0	0.03994	0.182932	0.0428777	0.0314335	0.196107	0	0.131127
EGFL6	1	complement(123018708..123059075)	ENSGALG00000016584	10	15	26	20	19	22	19	20	0.112226	0.161832	0.327873	0.22853	0.170919	0.296591	0.274062	0.224373	0.29587	0.41256	0.815066	0.560693	0.451838	0.741791	0.703123	0.568915	0.445416	0.5991	1.18906	0.857554	0.597237	1.07859	0.977924	0.874179
ENSGALG00000026383	1	complement(123358484..123360112)	ENSGALG00000026383	27634	20125	24155	18258	33133	19062	21325	19729	1016.31	711.536	998.22	683.681	976.753	842.152	1008.02	725.324	2679.36	1813.92	2481.49	1677.39	2582.12	2106.27	2586.15	1839.12	1230.86	803.793	1104.68	782.861	1041.49	934.546	1097.59	862.334
TLR7	1	complement(123406951..123414379)	ENSGALG00000016590	210	139	198	91	276	96	119	90	1.43077	0.910425	1.51584	0.631262	1.50731	0.785709	1.04207	0.612968	3.77204	2.32095	3.76825	1.54879	3.98468	1.9651	2.6735	1.55423	9.35374	5.55166	9.05512	3.90187	8.67566	4.70656	6.12489	3.93381
PRPS2	1	complement(123420158..123444697)	ENSGALG00000016592	16	19	39	10	22	14	16	13	0.28265	0.322673	0.774161	0.179865	0.311526	0.297097	0.363287	0.229572	0.745171	0.822592	1.9245	0.441296	0.823542	0.743055	0.932035	0.582097	0.712666	0.75886	1.78358	0.428777	0.691538	0.686373	0.823515	0.568216
ENSGALG00000044773	1	complement(123447907..123449388)	ENSGALG00000044773	0	0	0	0	0	0	0	0	0	0	0	0	0	0	0	0	0	0	0	0	0	0	0	0	0	0	0	0	0	0	0	0
FRMPD4	1	complement(123533142..123555601)	ENSGALG00000033541	11	26	7	6	25	7	16	7	0.0899005	0.204278	0.0642843	0.0499274	0.163777	0.0687238	0.16807	0.057189	0.237011	0.520768	0.159806	0.122496	0.432955	0.171882	0.431193	0.145007	0.489958	1.03844	0.320131	0.257266	0.785838	0.343187	0.823515	0.305963
MSL3	1	complement(123965939..123988233)	ENSGALG00000041433	588	829	775	734	1080	696	672	658	6.96849	9.44485	10.3205	8.85678	10.2595	9.90857	10.236	7.7953	18.3715	24.0778	25.6559	21.7299	27.1218	24.7819	26.2611	19.7656	26.1905	33.1103	35.443	31.4722	33.9482	34.1225	34.5876	28.7605
ENSGALG00000040526	1	complement(124018216..124018503)	ENSGALG00000040526	114	163	118	163	243	132	131	149	12.194	16.7612	14.1827	17.7519	20.8348	16.9611	18.0099	15.932	32.1478	42.7296	35.2571	43.554	55.0782	42.4206	46.2055	40.3969	5.07774	6.51022	5.39649	6.98907	7.63835	6.47152	6.74253	6.51263
ARHGAP6	1	124175179..124319202	ENSGALG00000016602	104	115	104	92	165	85	97	88	2.21998	2.3599	2.49452	1.9995	2.82321	2.17959	2.66126	1.87778	5.85269	6.0161	6.20118	4.90574	7.46335	5.45128	6.82764	4.76126	4.63233	4.5931	4.75622	3.94475	5.18653	4.16727	4.99256	3.84639
[truncated: 14,061 more rows]

## Sheet: TS3_DeSeq2_output
ID	genes	Log2FC	P-val	FDR P-val
[truncated: 15,569 more rows]

[truncated: 4 more sheets: TS4_Upstream Regulators, TS5_Diseases and Functions, TS6_IPA_Toxicology, FS2_Disease heatmap]
